# Supplementary material for: TDP-43 Controls HIV-1 Viral Production and Virus Infectiveness
Source: MDPI journal article supplement (doi:10.3390/ijms24087658), 2023-04-21
Supplement: s1 [file s1]

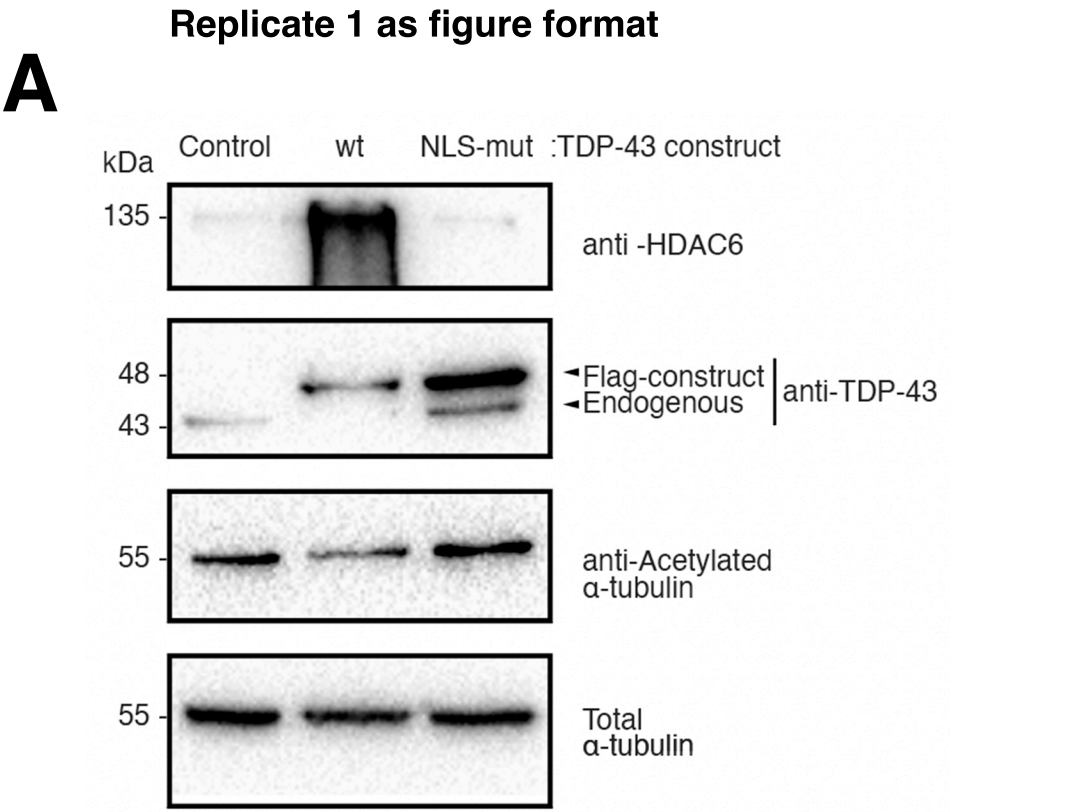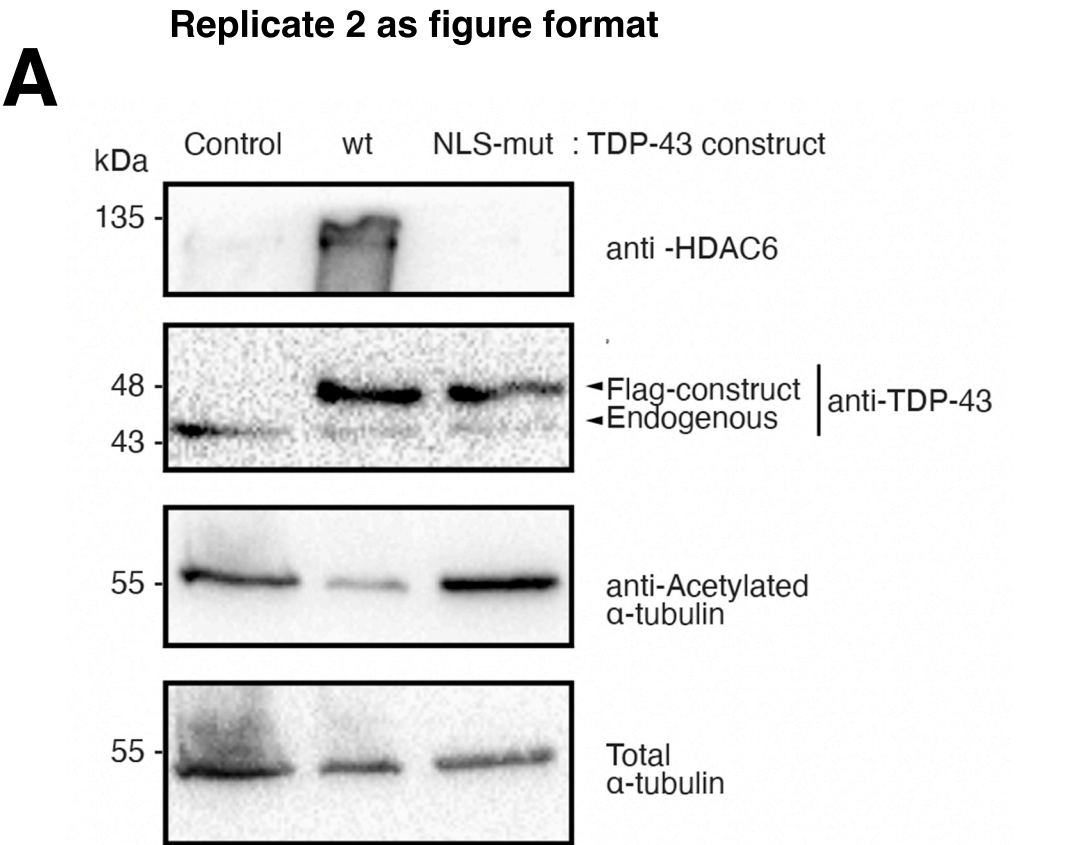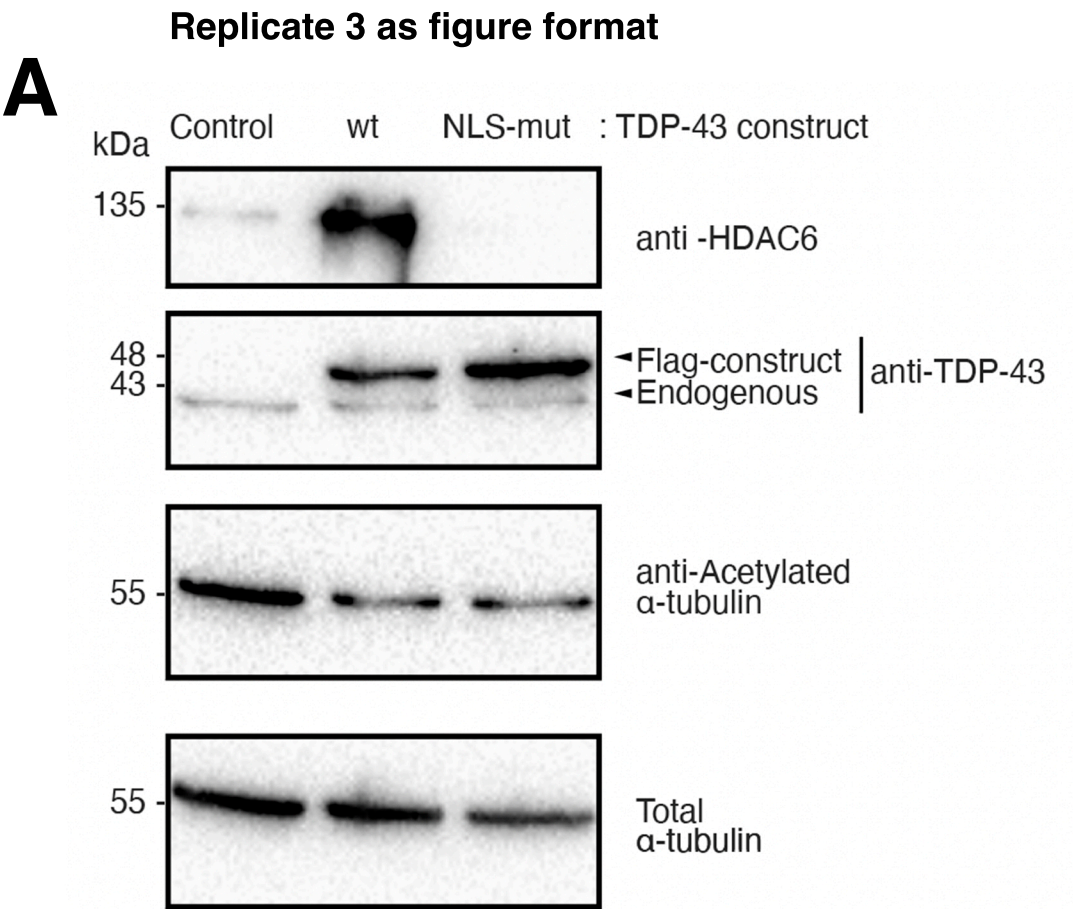



**Figure S1.** Replicate 1 HDAC6 complete gel Western-blot associated with Figure 1A  
Cabrera-Rodríguez, R., *et al.*

Control    wt    NLS-mut    : TDP-43 construct

135kDa-

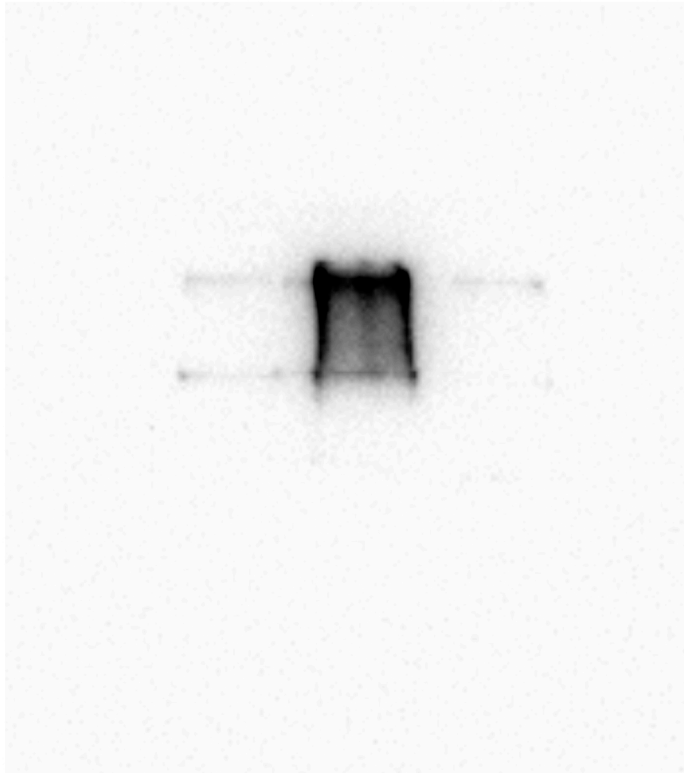

► Specific HDAC6 band



**Figure S1.** Replicate 1 TDP-43 complete gel Western-blot associated with Figure 1A  
Cabrera-Rodríguez, R., *et al.*

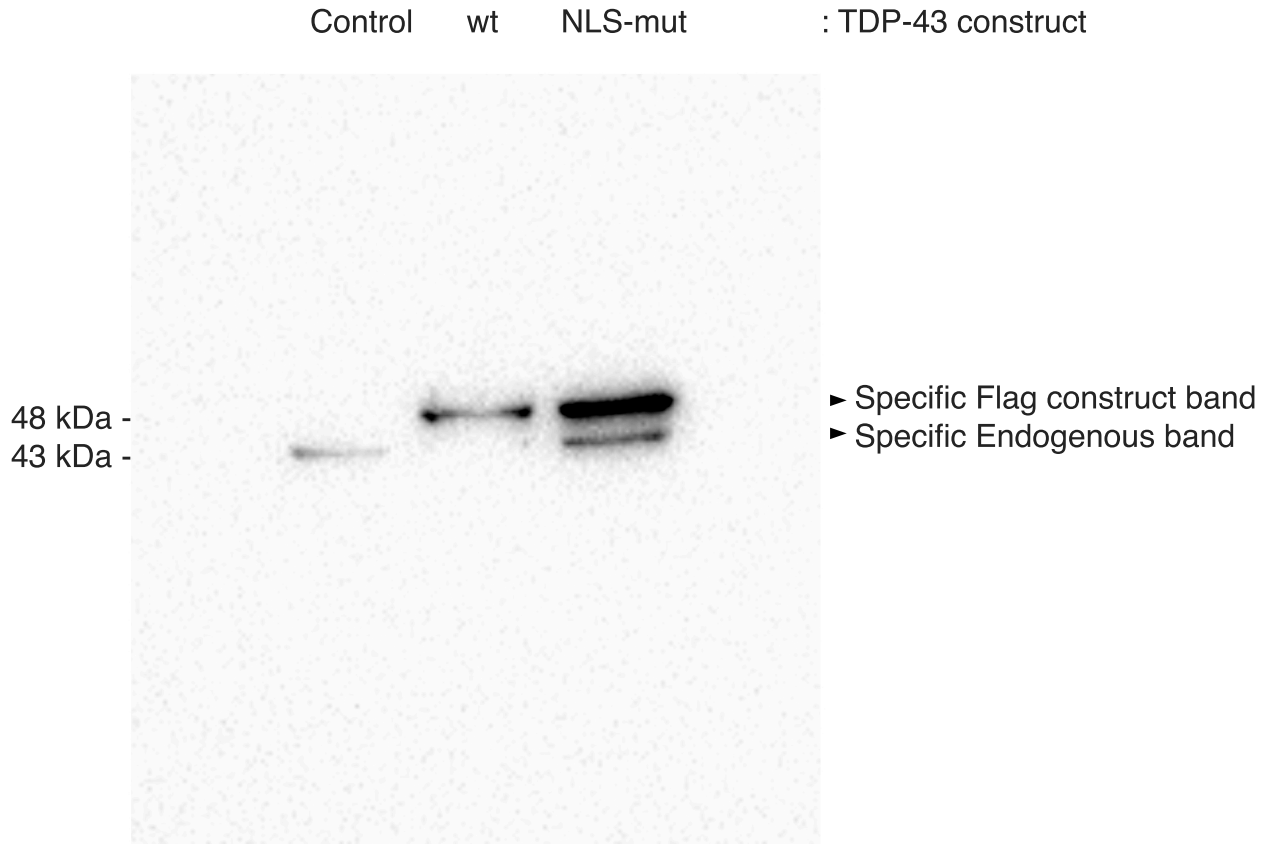



**Figure S1.** Replicate 1 Acetylated  $\alpha$ -tubulin complete gel Western-blot associated with Figure 1A  
Cabrera-Rodríguez, R., *et al.*

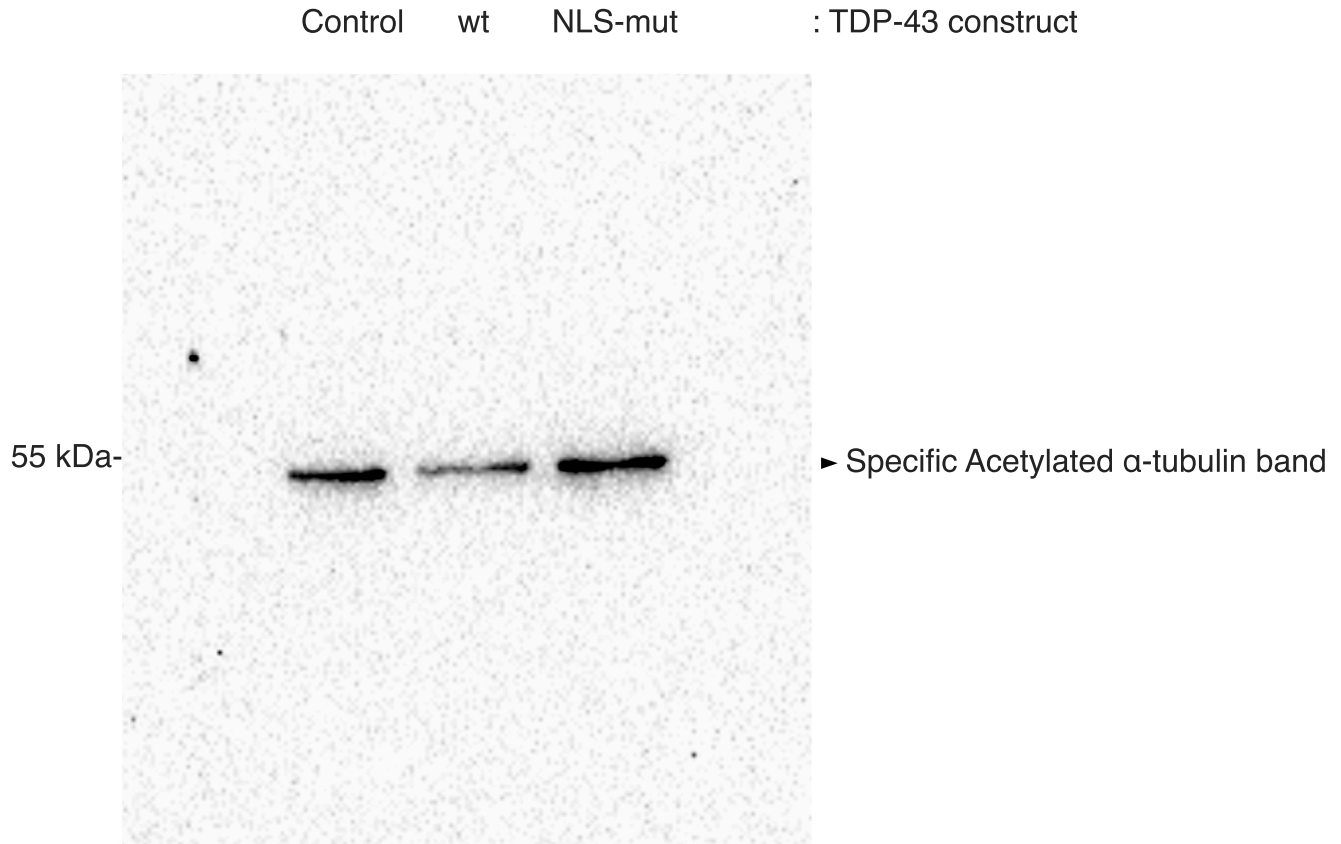



**Figure S1.** Replicate 1 Total  $\alpha$ -tubulin complete gel Western-blot associated with Figure 1A  
Cabrera-Rodríguez, R., *et al.*

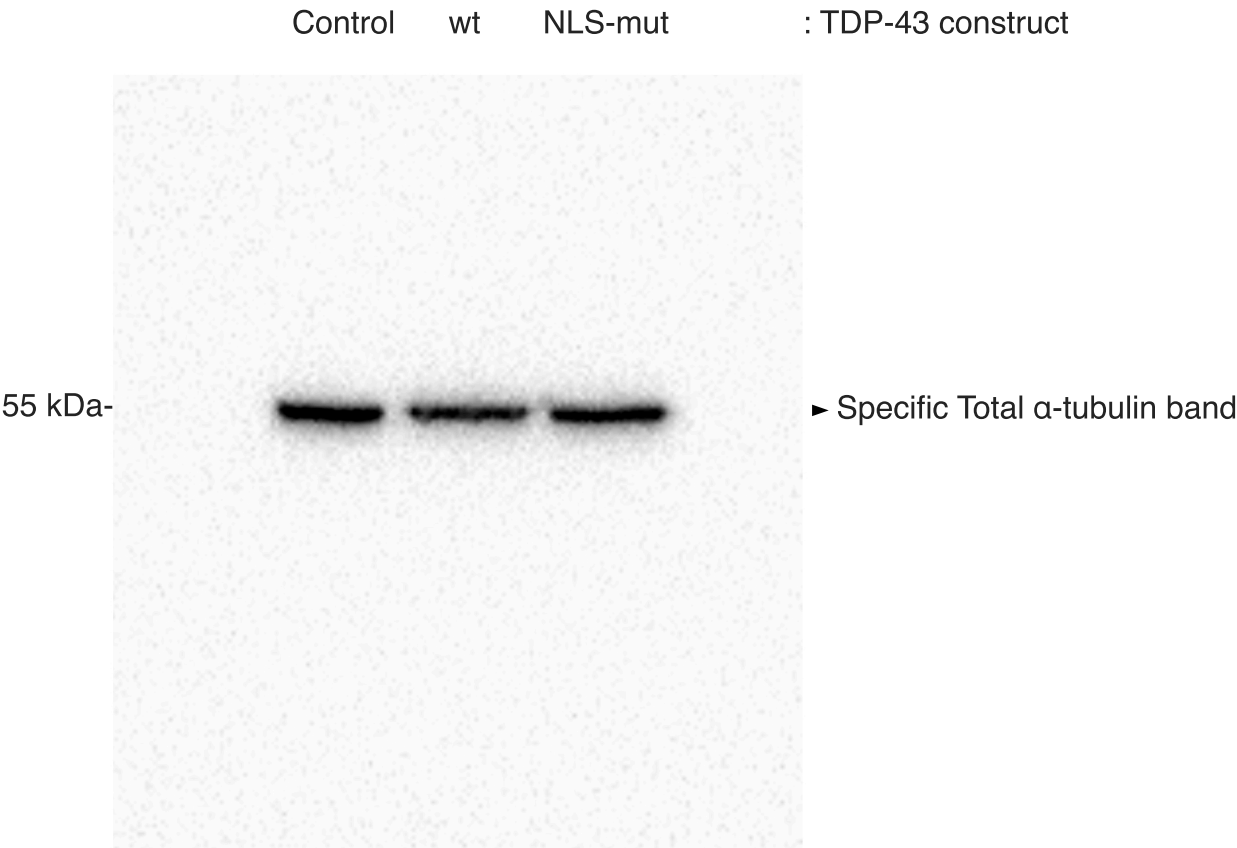



**Figure S1.** Replicate 2 HDAC6 complete gel Western-blot associated with Figure 1A  
Cabrera-Rodríguez, R., *et al.*

Control    wt    NLS-mut    : TDP-43 construct

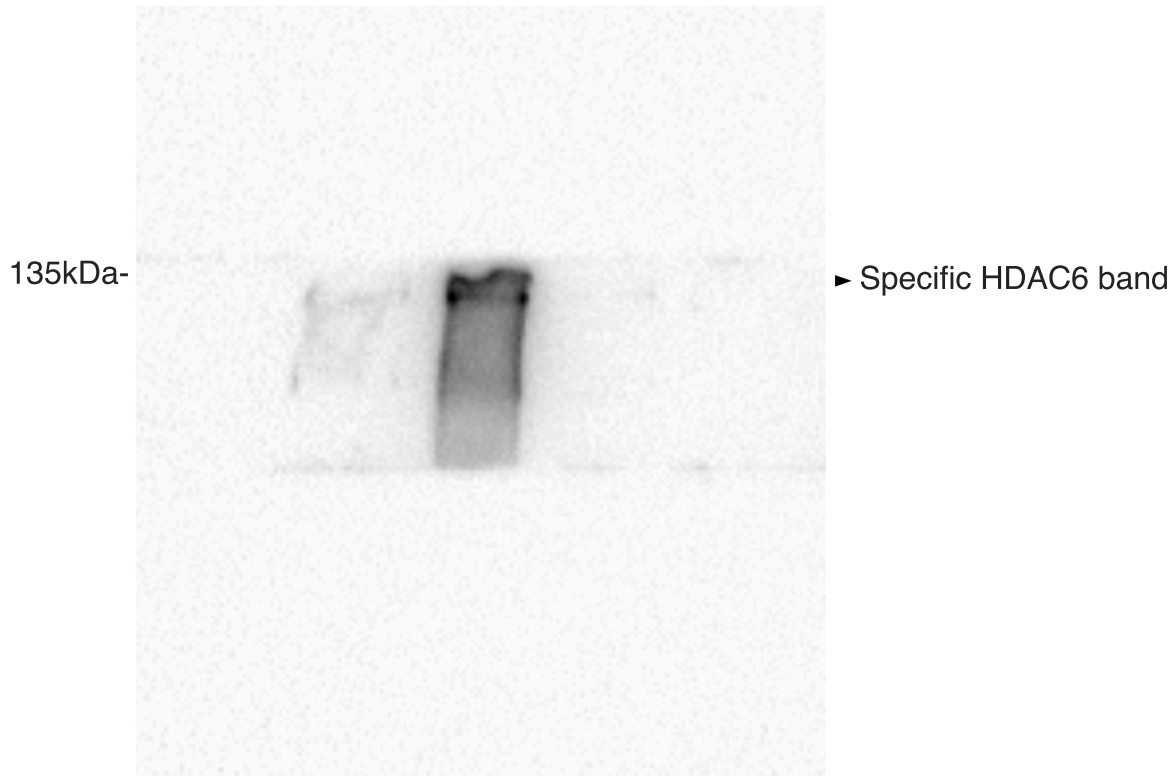

**Figure S1.** Replicate 2 TDP-43 complete gel Western-blot associated with Figure 1A  
Cabrera-Rodríguez, R., *et al.*

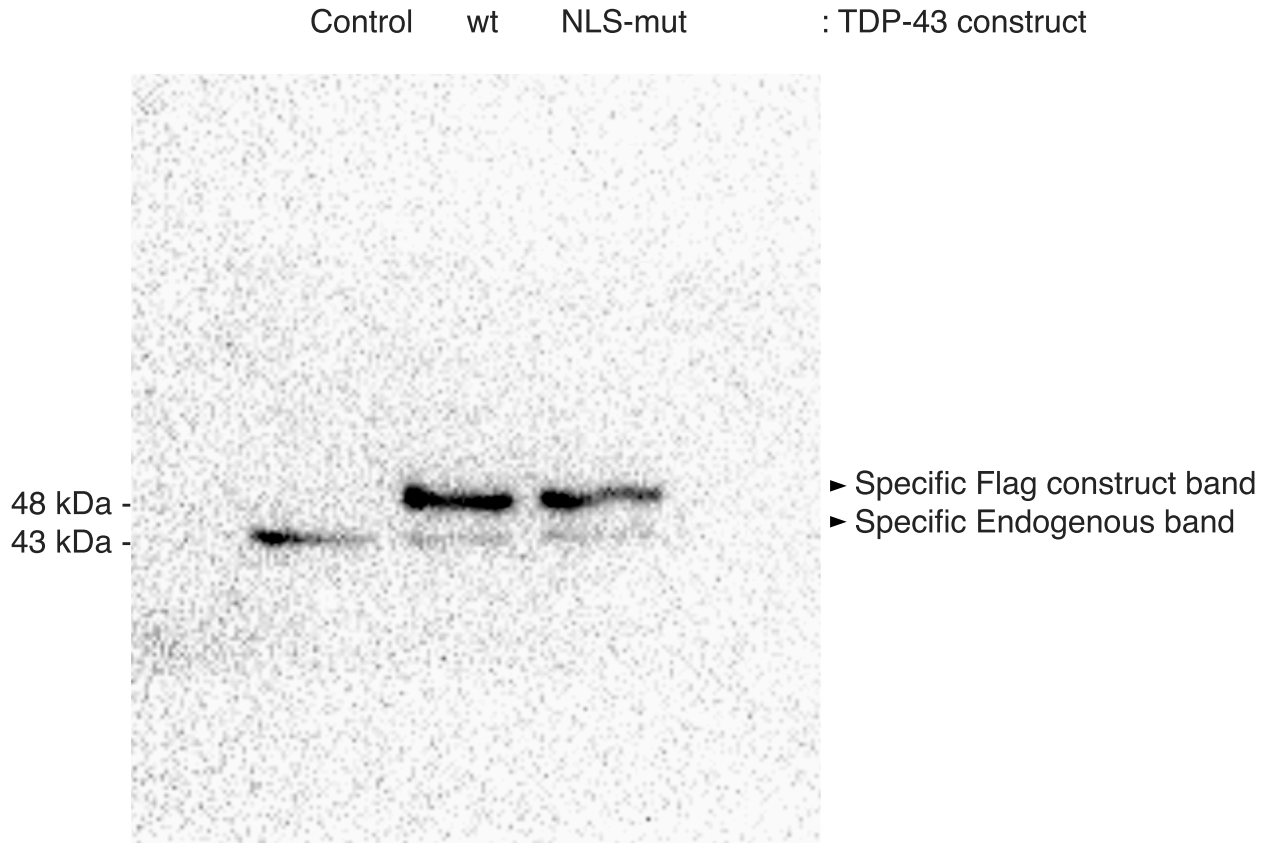

**Figure S1.** Replicate 2 Acetylated  $\alpha$ -tubulin complete gel Western-blot associated with Figure 1A  
Cabrera-Rodríguez, R., *et al.*

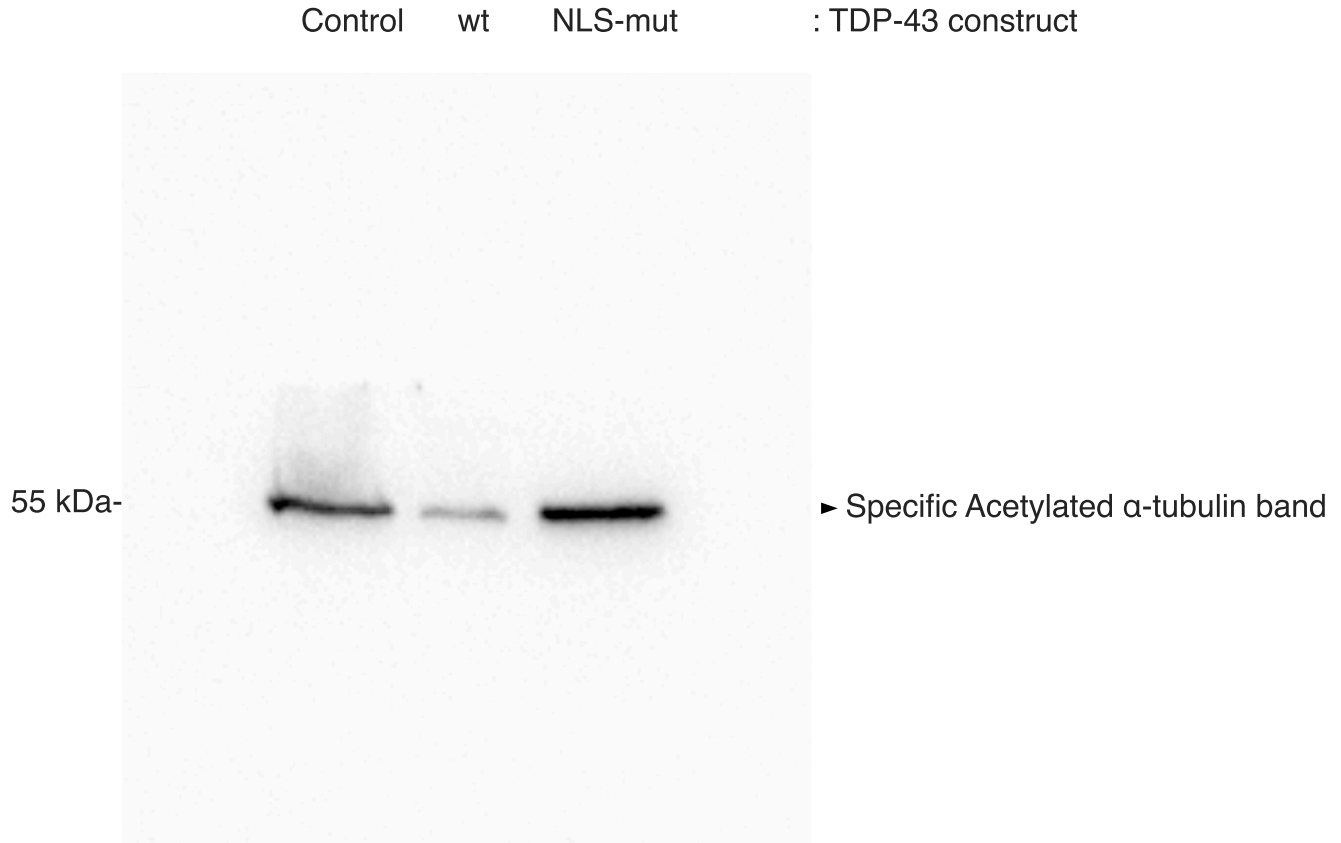

**Figure S1.** Replicate 2 Total  $\alpha$ -tubulin complete gel Western-blot associated with Figure 1A  
Cabrera-Rodríguez, R., *et al.*

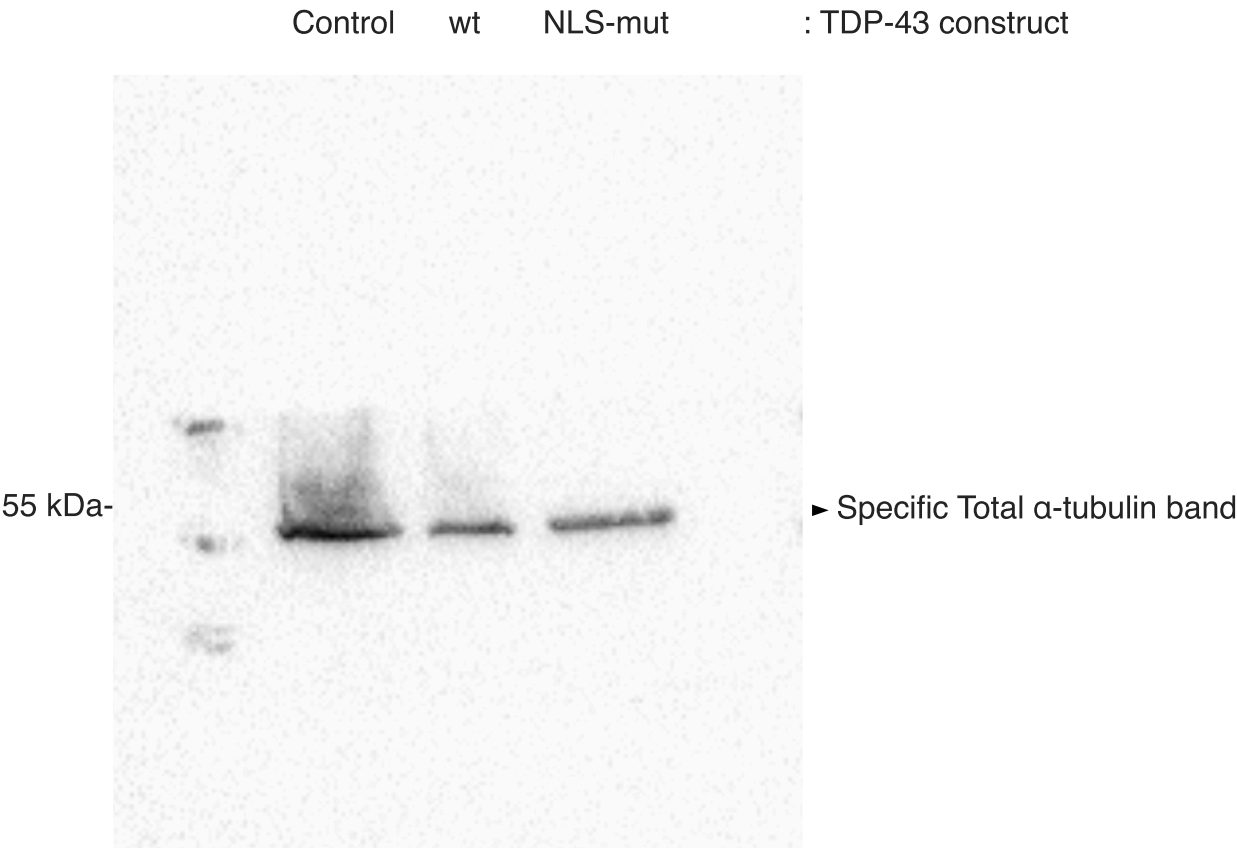

**Figure S1.** Replicate 3 HDAC6 complete gel Western-blot associated with Figure 1A  
Cabrera-Rodríguez, R., *et al.*

Control    wt    NLS-mut    : TDP-43 construct

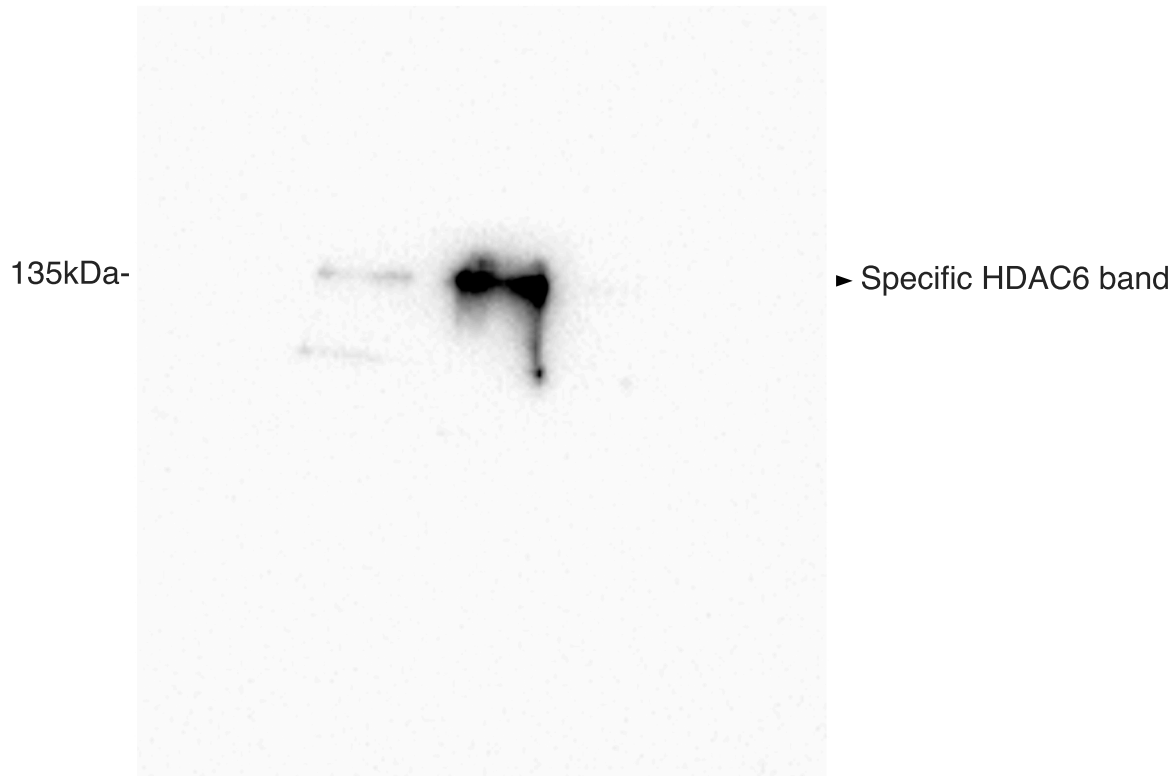

**Figure S1.** Replicate 3 TDP-43 complete gel Western-blot associated with Figure 1A  
Cabrera-Rodríguez, R., *et al.*

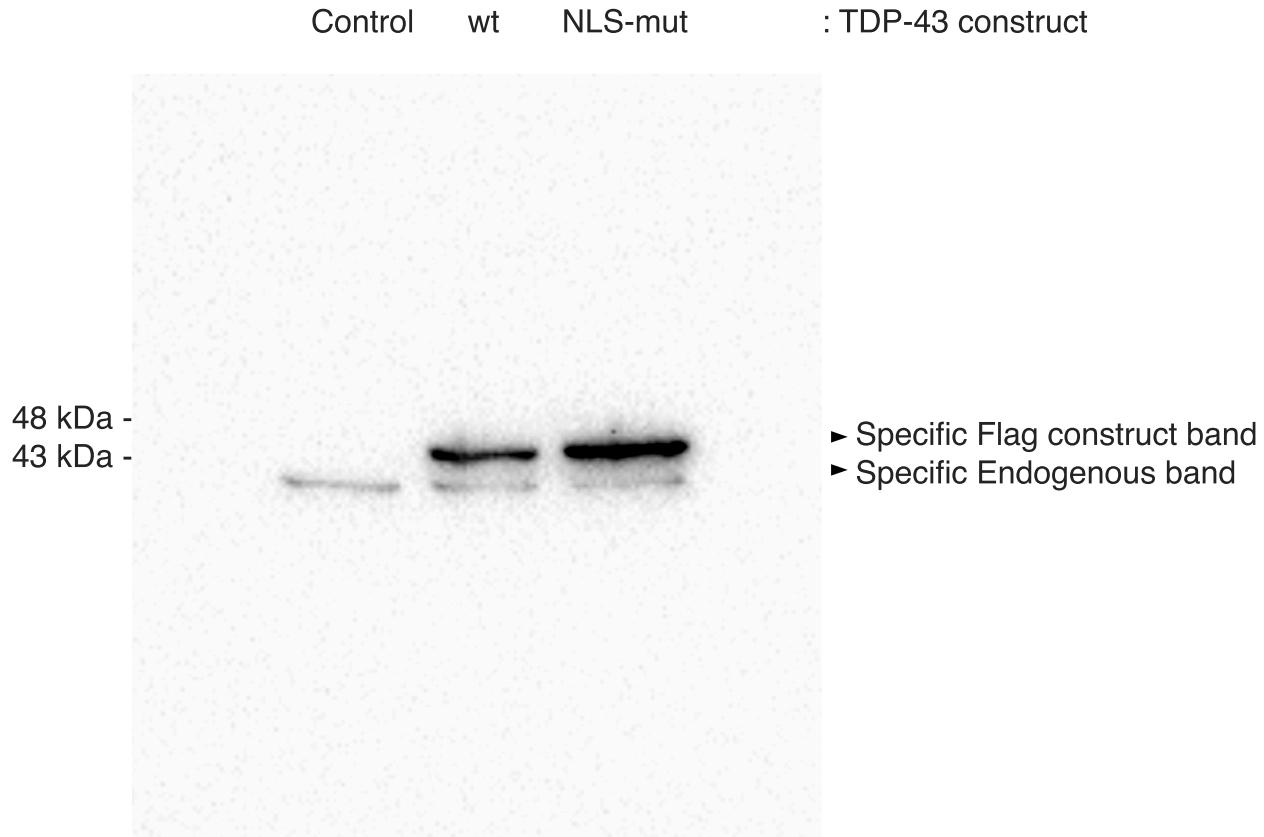



**Figure S1.** Replicate 3 Acetylated  $\alpha$ -tubulin complete gel Western-blot associated with Figure 1A  
Cabrera-Rodríguez, R., *et al.*

Control    wt    NLS-mut    : TDP-43 construct

55 kDa-

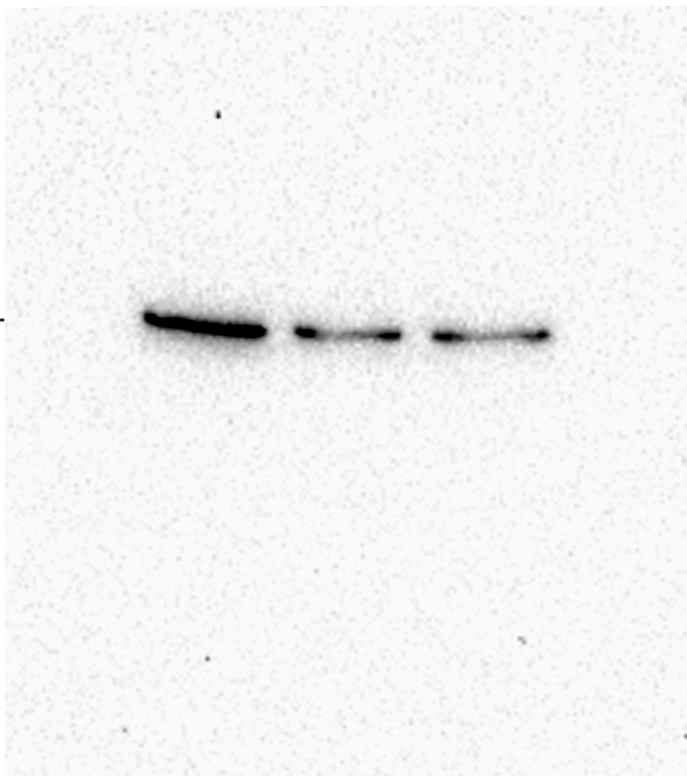

► Specific Acetylated  $\alpha$ -tubulin band

**Figure S1.** Replicate 3 Total  $\alpha$ -tubulin complete gel Western-blot associated with Figure 1A  
Cabrera-Rodríguez, R., *et al.*

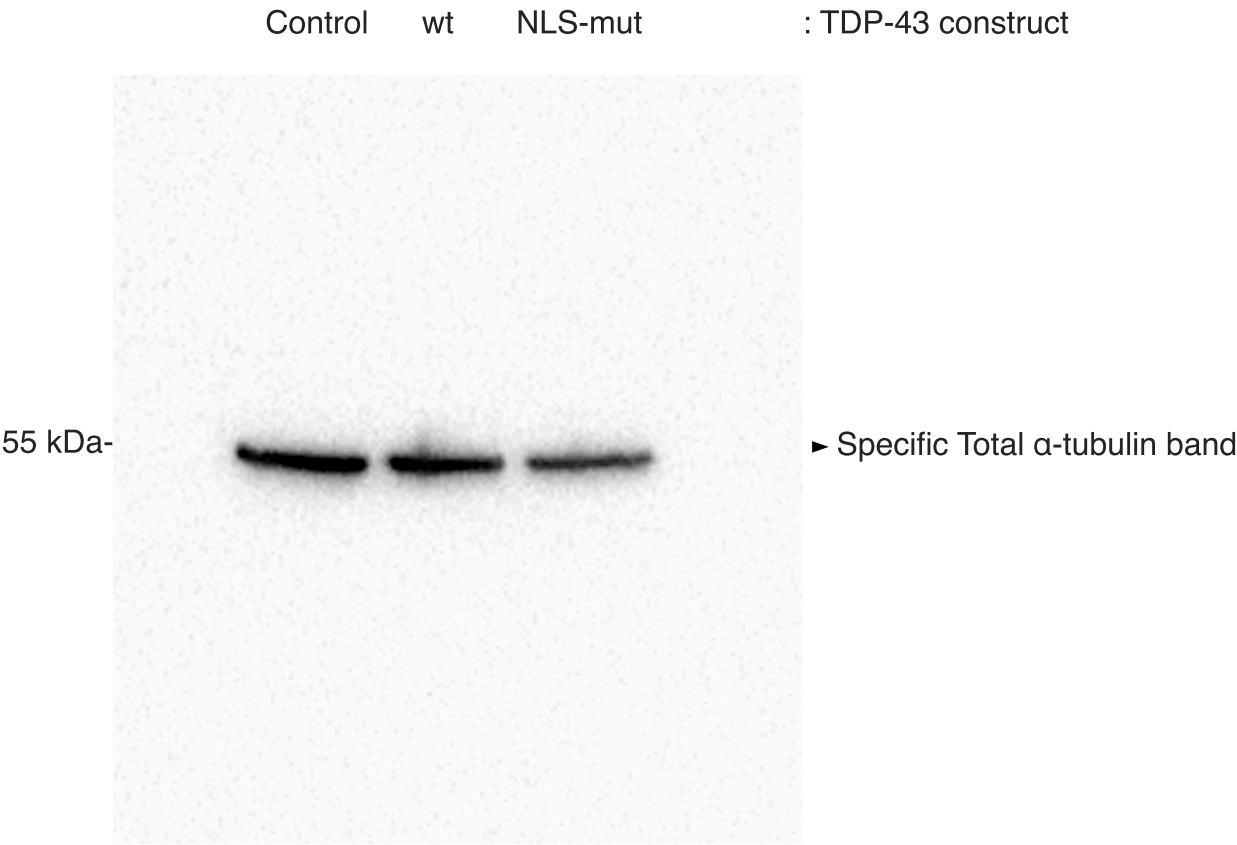

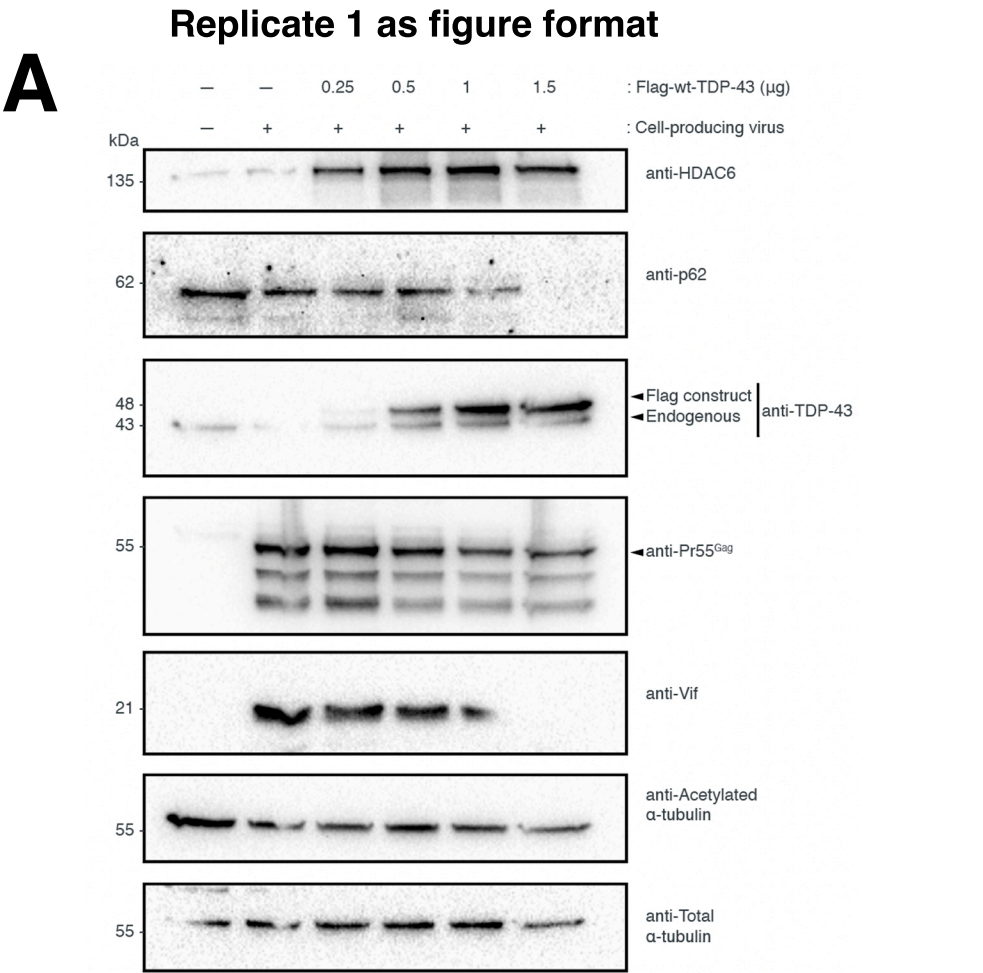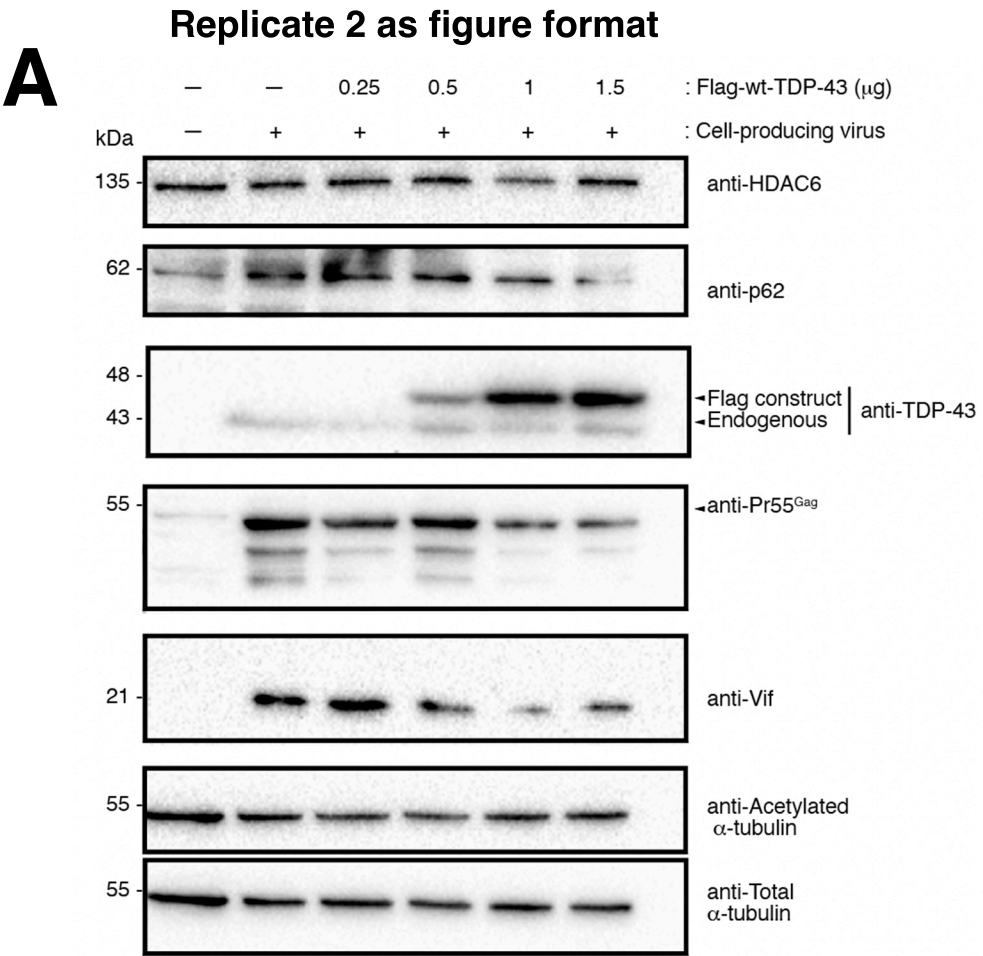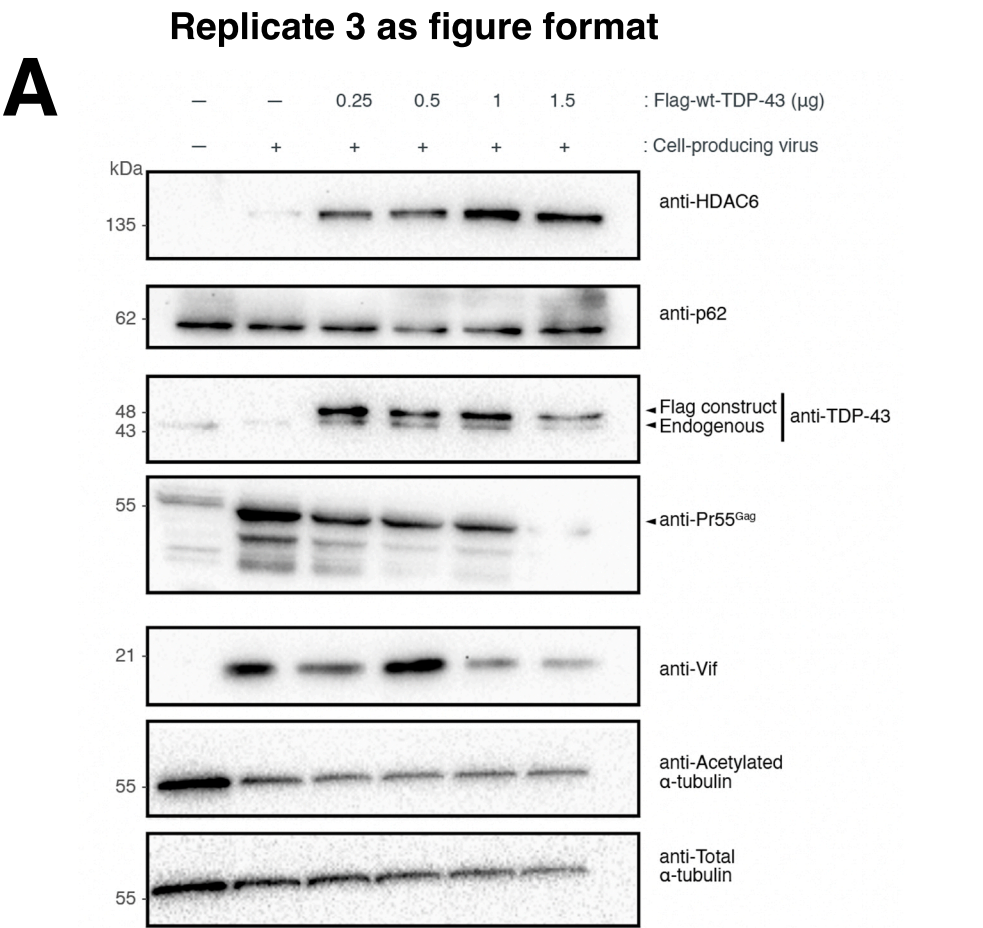

**Figure S2A.** Replicate 1 HDAC6 complete gel Western-blot associated with Figure 2A  
Cabrera-Rodríguez, R., *et al.*

|   |   |      |     |   |     |                        |
|---|---|------|-----|---|-----|------------------------|
| — | — | 0.25 | 0.5 | 1 | 1.5 | : Flag-wt-TDP-43 (μg)  |
| — | + | +    | +   | + | +   | : Cell-producing virus |

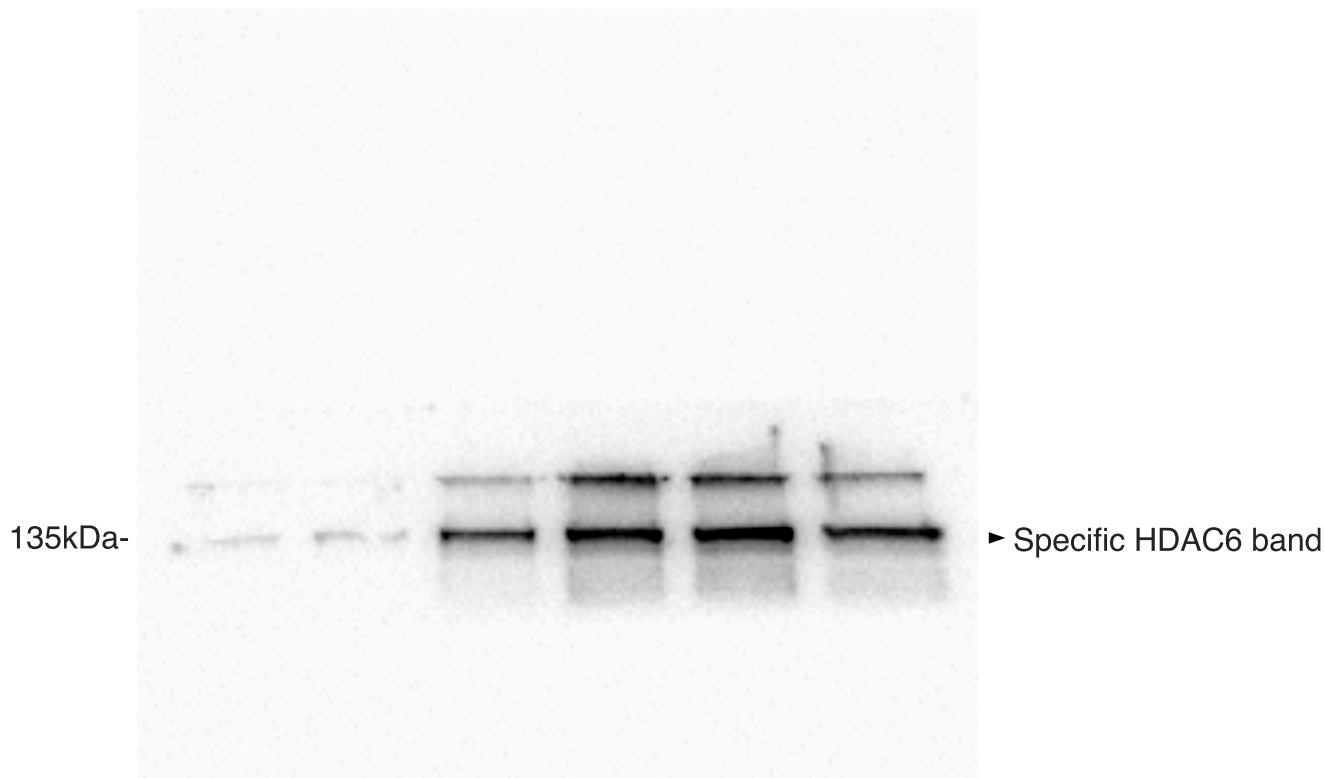

**Figure S2A.** Replicate 1 p62 complete gel Western-blot associated with Figure 2A  
Cabrera-Rodríguez, R., *et al.*

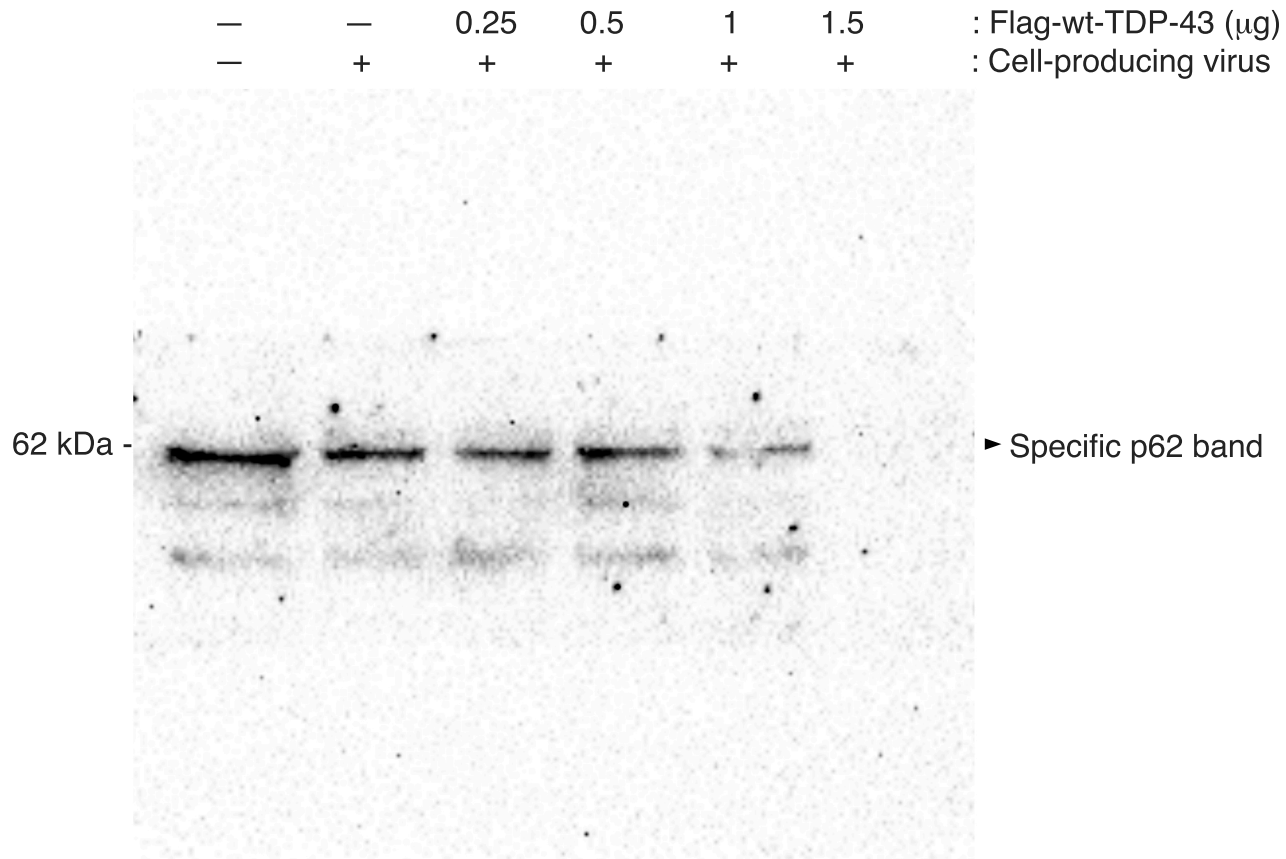

**Figure S2A.** Replicate 1 TDP-43 complete gel Western-blot associated with Figure 2A  
Cabrera-Rodríguez, R., *et al.*

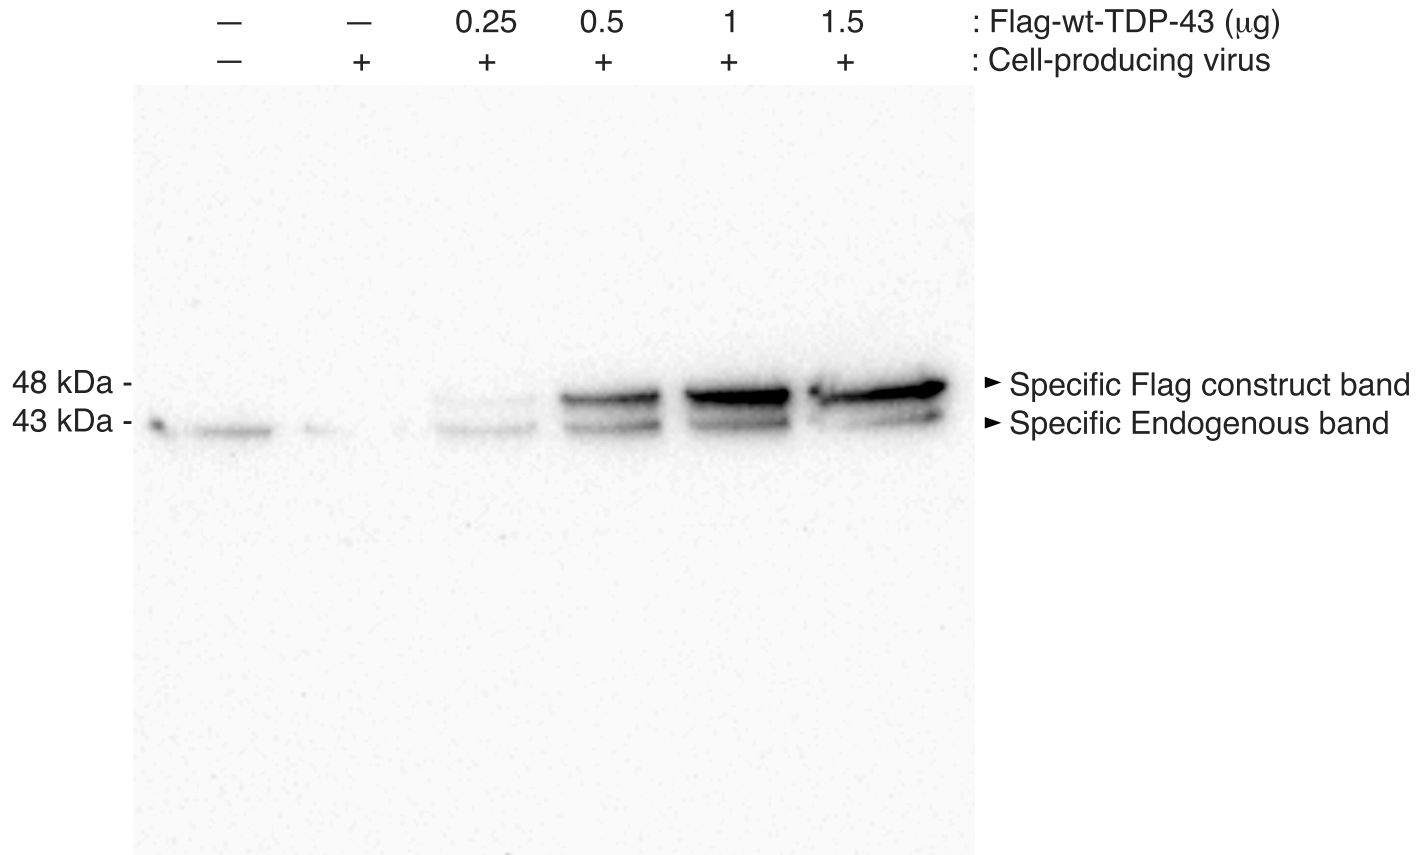



**Figure S2A.** Replicate 1 Pr55<sup>Gag</sup> complete gel Western-blot associated with Figure 2A  
Cabrera-Rodríguez, R., *et al.*

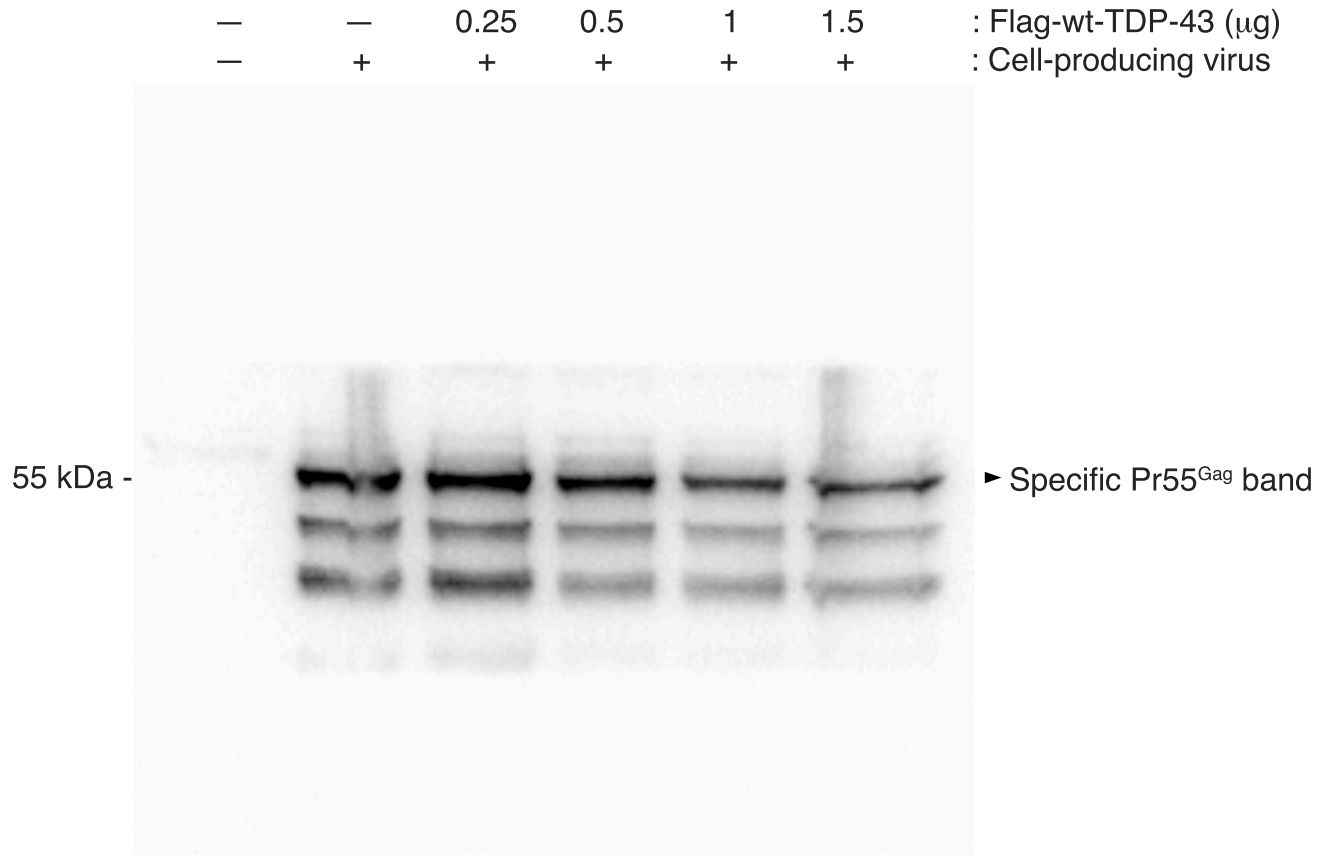

**Figure S2A.** Replicate 1 Vif complete gel Western-blot associated with Figure 2A  
Cabrera-Rodríguez, R., *et al.*

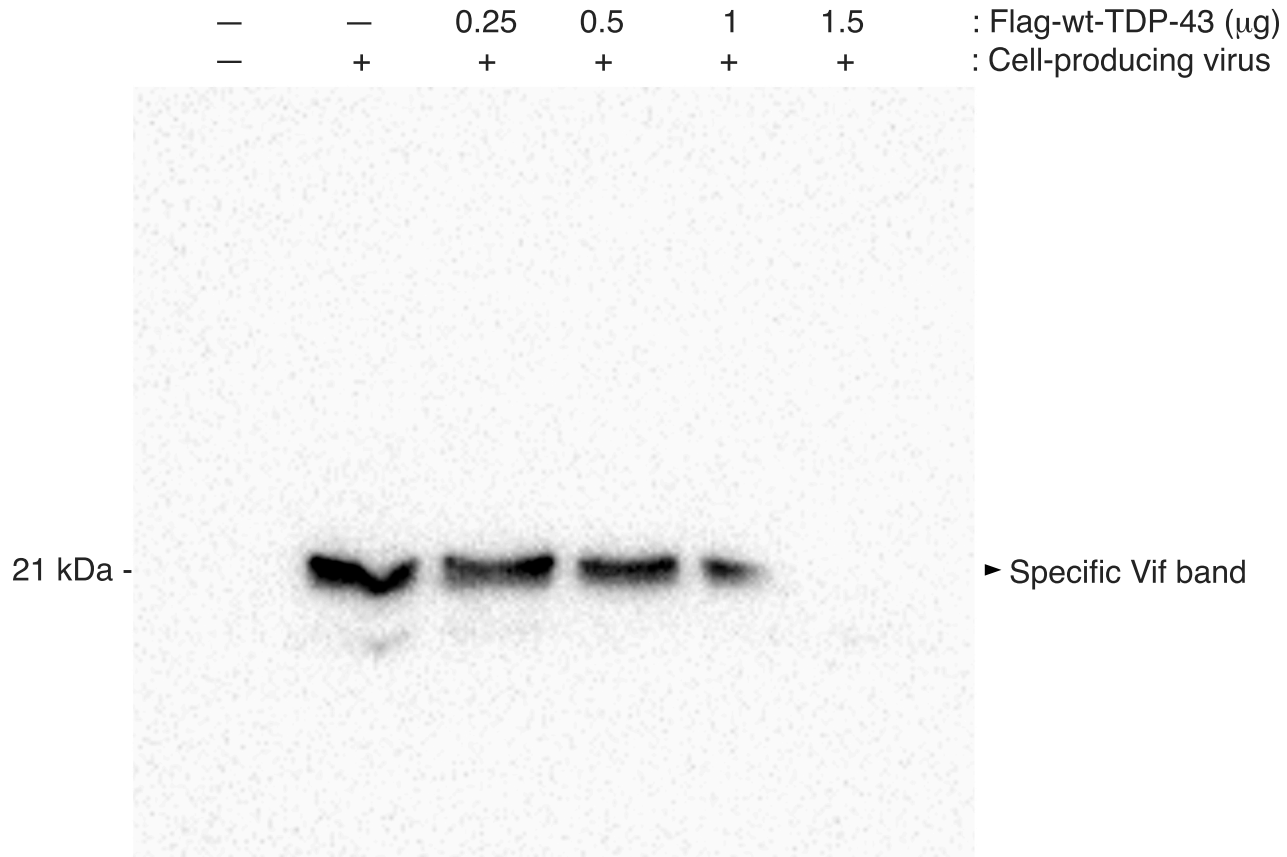

**Figure S2A.** Replicate 1 Acetylated  $\alpha$ -tubulin complete gel Western-blot associated with Figure 2A  
Cabrera-Rodríguez, R., *et al.*

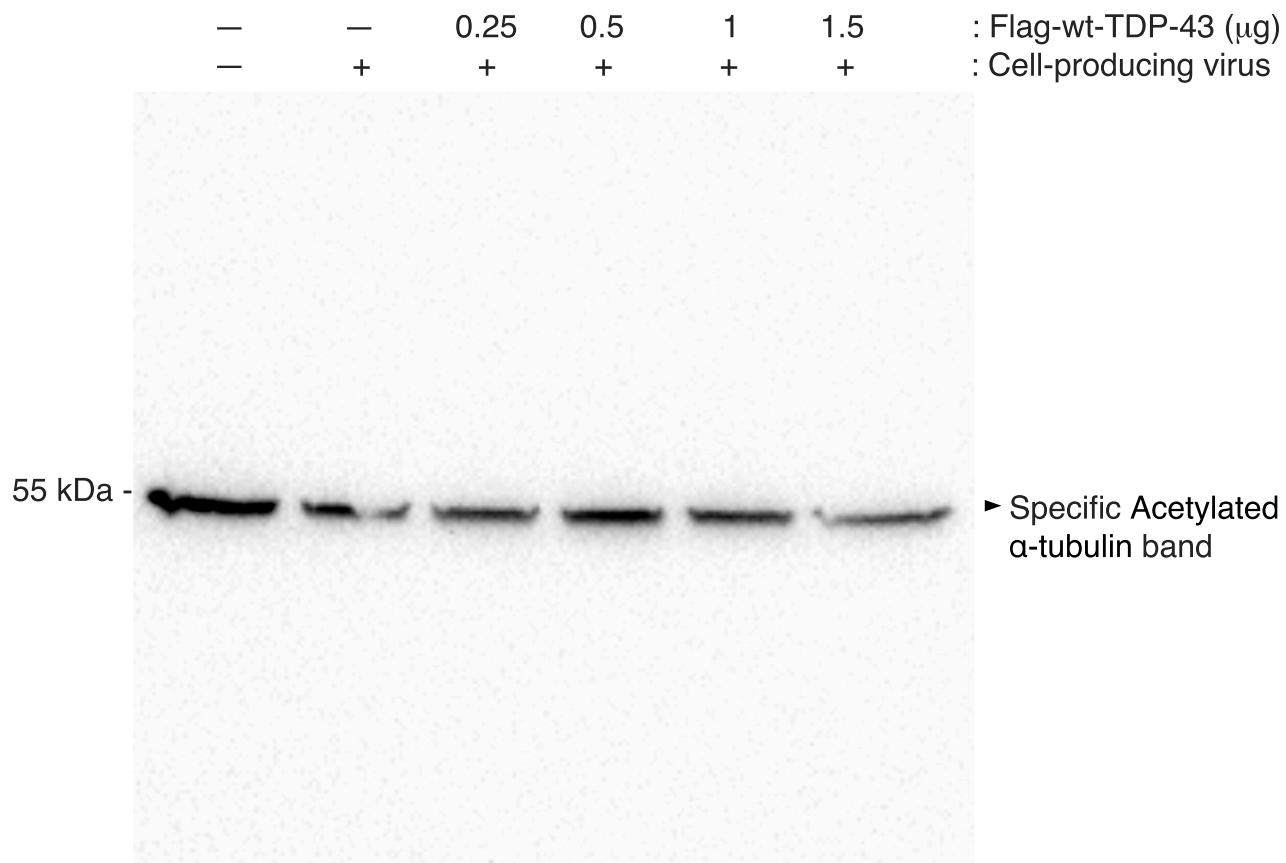

**Figure S2A.** Replicate 1 Total  $\alpha$ -tubulin complete gel Western-blot associated with Figure 2A  
Cabrera-Rodríguez, R., *et al.*

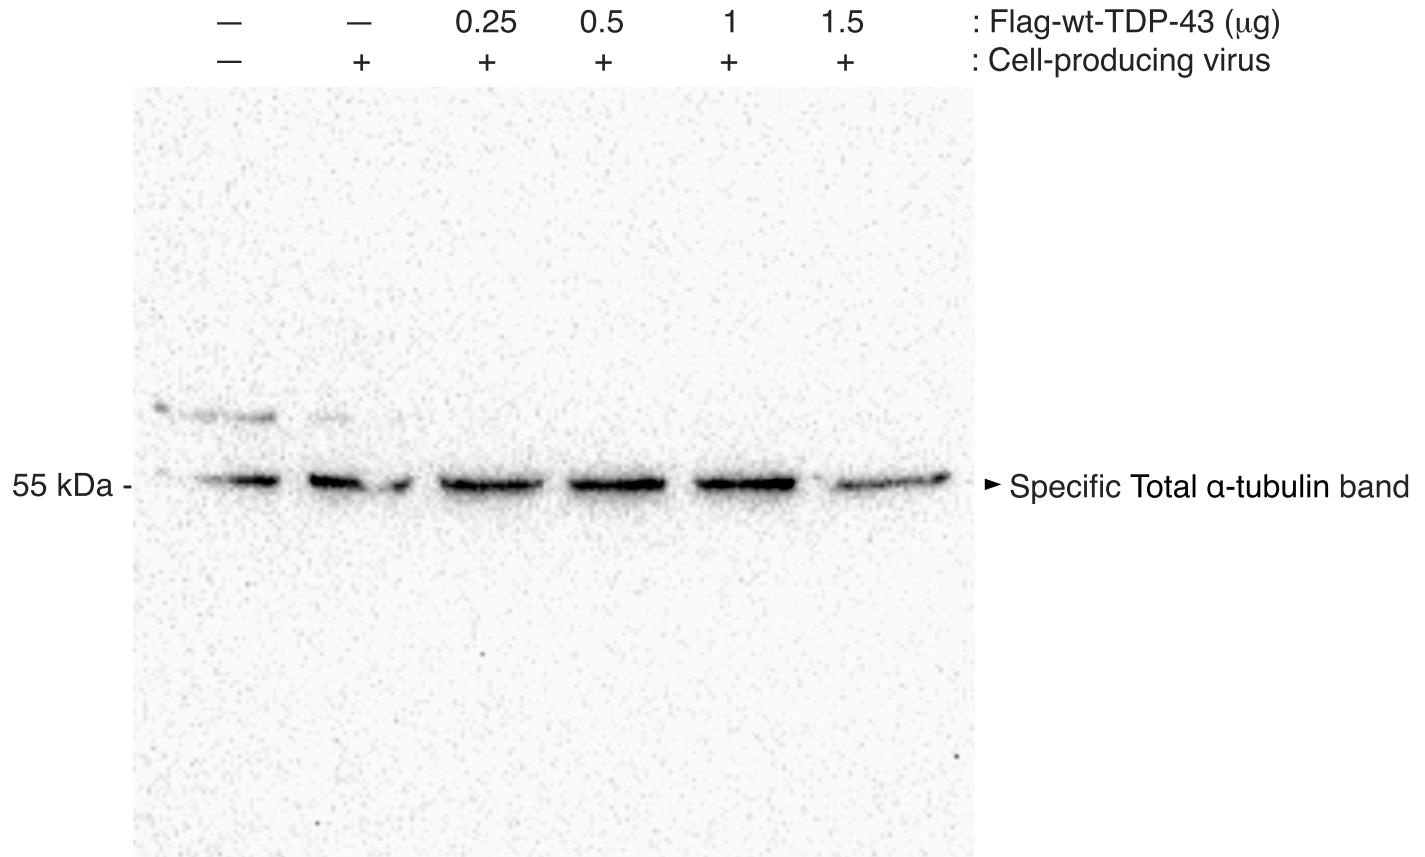

**Figure S2A.** Replicate 2 HDAC6 complete gel Western-blot associated with Figure 2A  
Cabrera-Rodríguez, R., *et al.*

|   |   |      |     |   |     |                        |
|---|---|------|-----|---|-----|------------------------|
| — | — | 0.25 | 0.5 | 1 | 1.5 | : Flag-wt-TDP-43 (μg)  |
| — | + | +    | +   | + | +   | : Cell-producing virus |

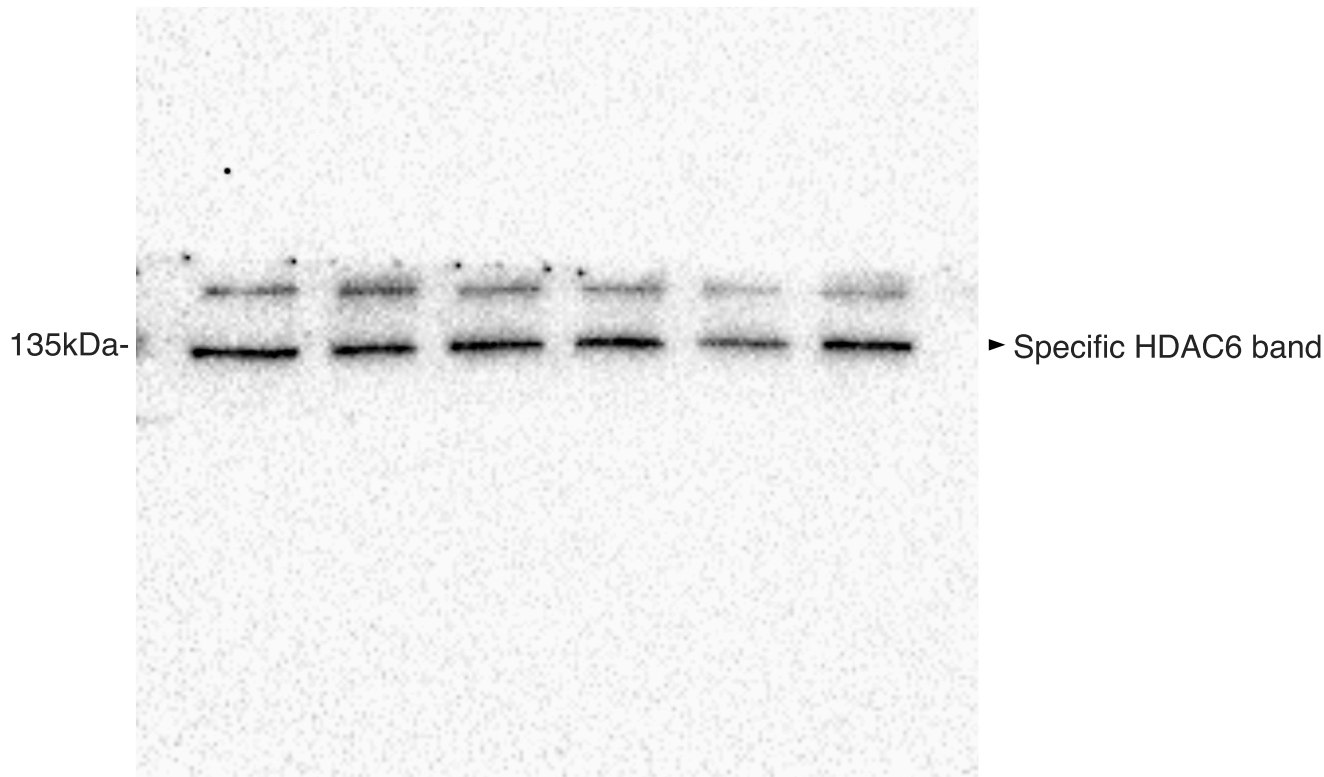

**Figure S2A.** Replicate 2 p62 complete gel Western-blot associated with Figure 2A  
Cabrera-Rodríguez, R., *et al.*

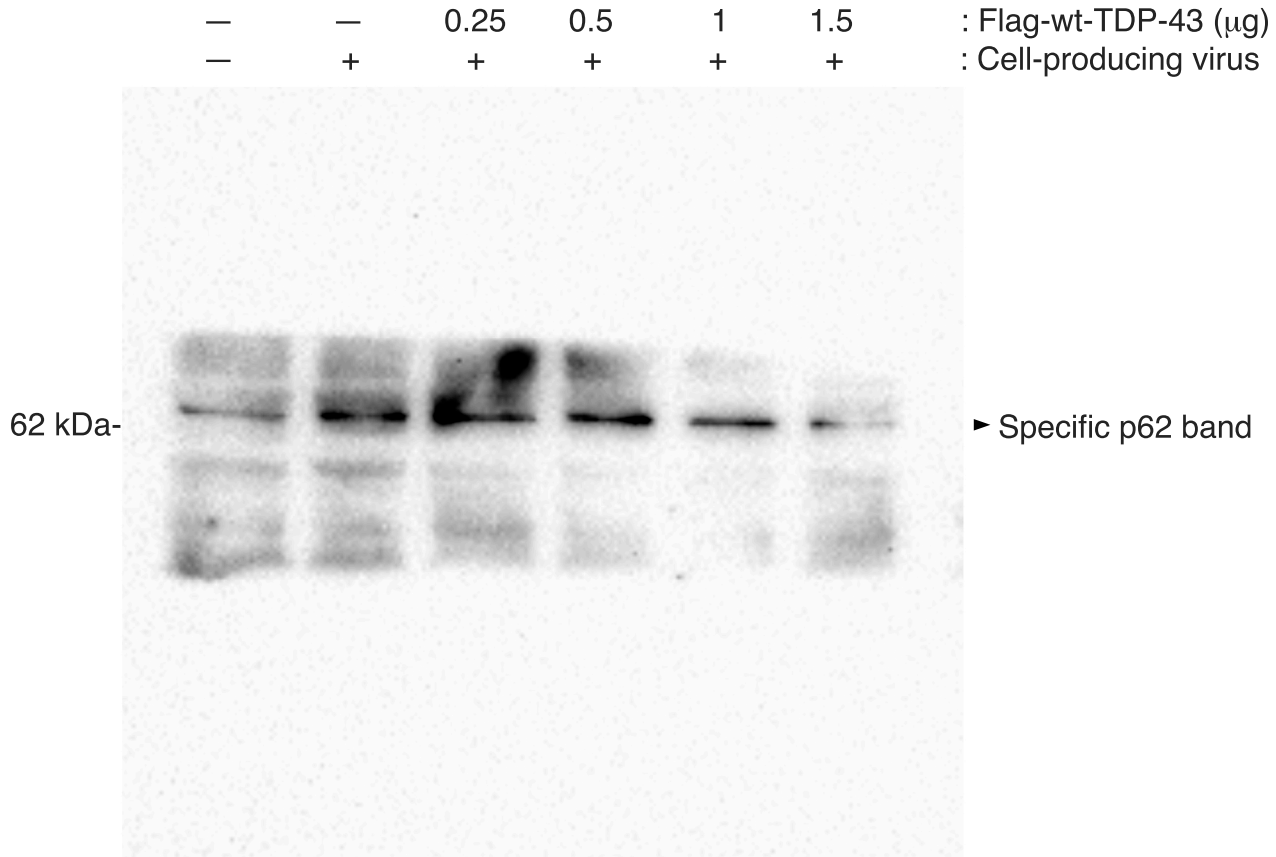

**Figure S2A.** Replicate 2 TDP-43 complete gel Western-blot associated with Figure 2A  
Cabrera-Rodríguez, R., *et al.*

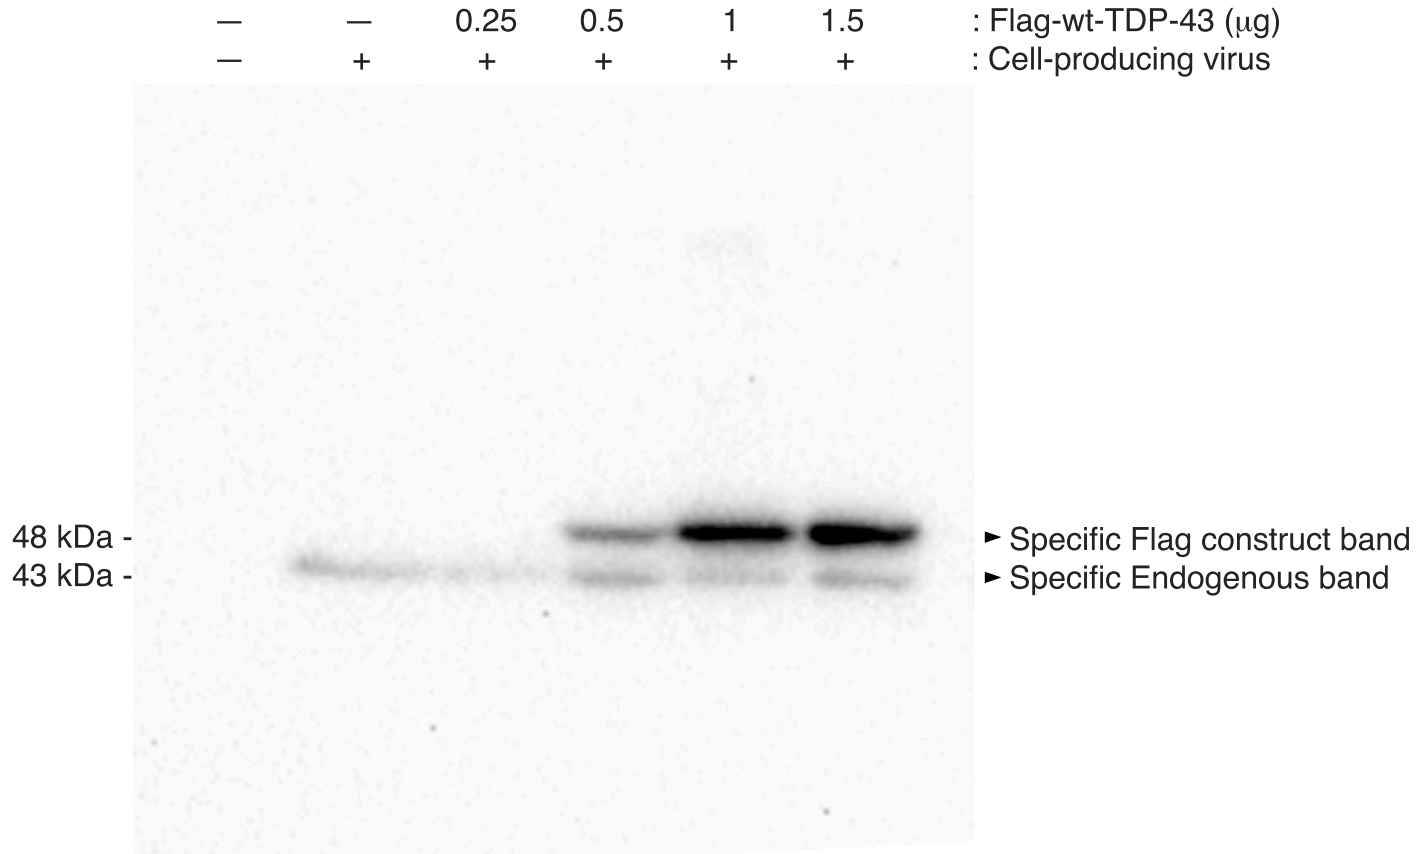



**Figure S2A.** Replicate 2 Pr55<sup>Gag</sup> complete gel Western-blot associated with Figure 2A  
Cabrera-Rodríguez, R., *et al.*

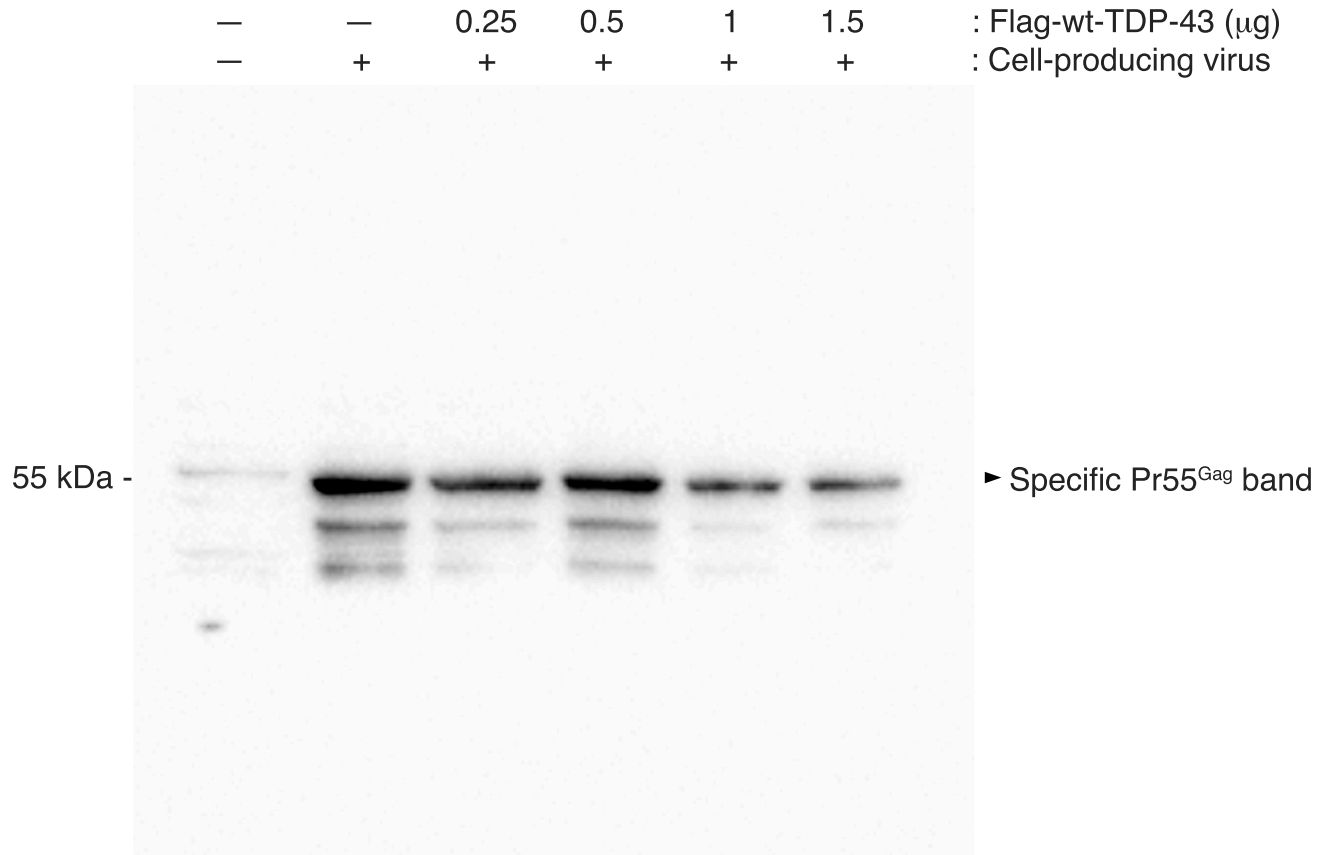

**Figure S2A.** Replicate 2 Vif complete gel Western-blot associated with Figure 2A  
Cabrera-Rodríguez, R., *et al.*

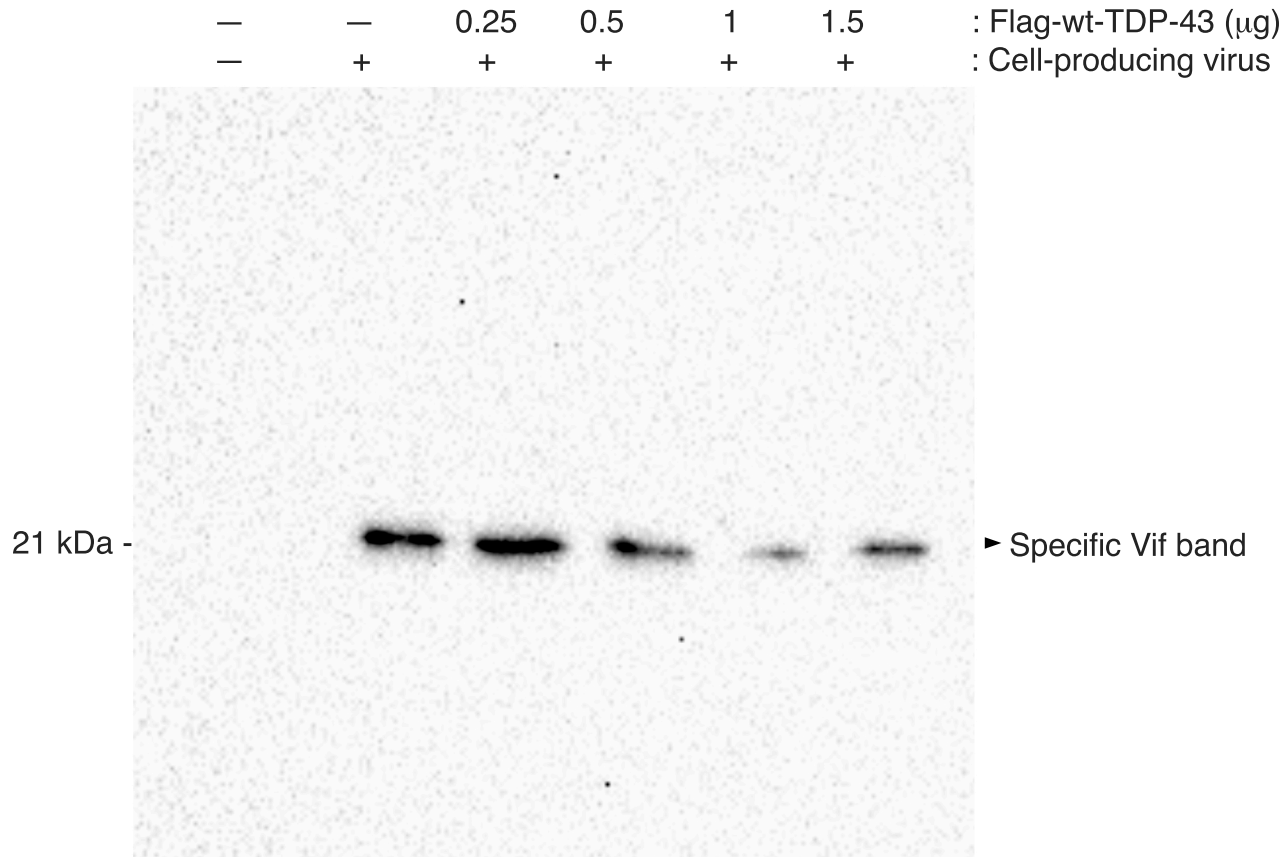

**Figure S2A.** Replicate 2 Acetylated  $\alpha$ -tubulin complete gel Western-blot associated with Figure 2A  
Cabrera-Rodríguez, R., *et al.*

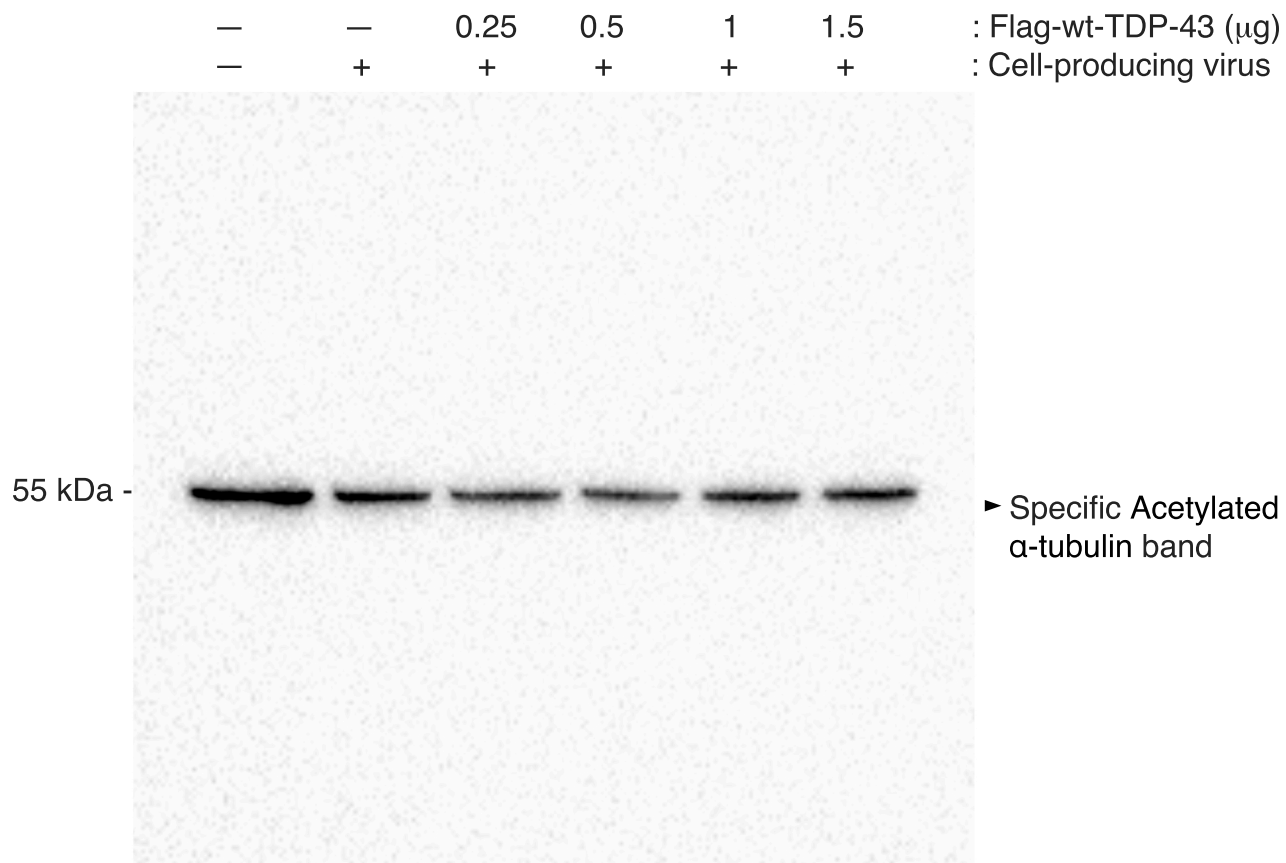

**Figure S2A.** Replicate 2 Total  $\alpha$ -tubulin complete gel Western-blot associated with Figure 2A  
Cabrera-Rodríguez, R., *et al.*

|   |   |      |     |   |     |                             |
|---|---|------|-----|---|-----|-----------------------------|
| — | — | 0.25 | 0.5 | 1 | 1.5 | : Flag-wt-TDP-43 ( $\mu$ g) |
| — | + | +    | +   | + | +   | : Cell-producing virus      |

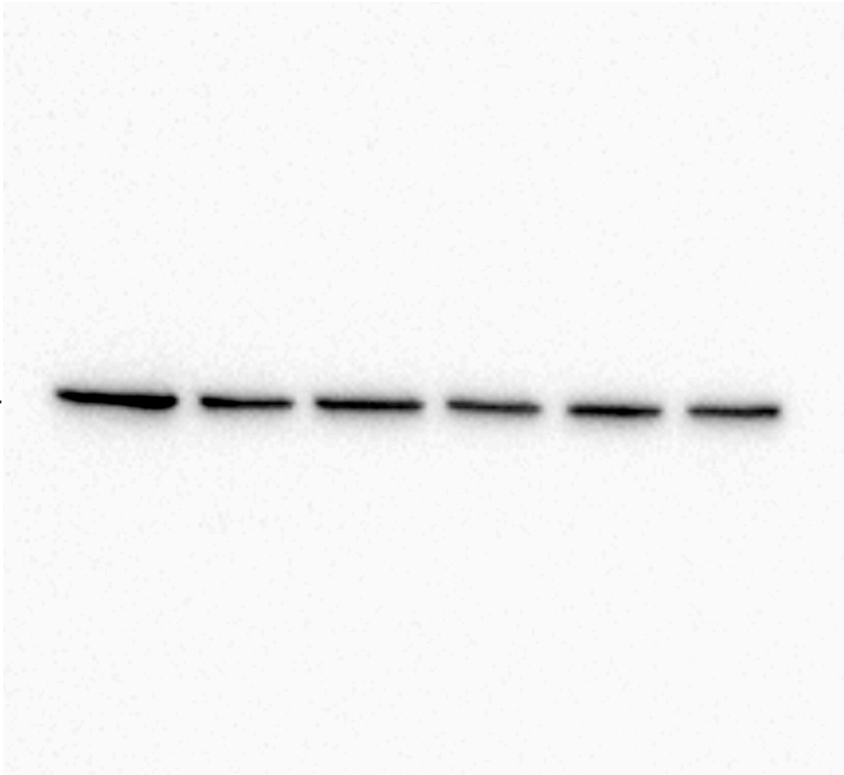

55 kDa -

► Specific Total  $\alpha$ -tubulin band

**Figure S2A.** Replicate 3 HDAC6 complete gel Western-blot associated with Figure 2A  
Cabrera-Rodríguez, R., *et al.*

|   |   |      |     |   |     |                        |
|---|---|------|-----|---|-----|------------------------|
| — | — | 0.25 | 0.5 | 1 | 1.5 | : Flag-wt-TDP-43 (μg)  |
| — | + | +    | +   | + | +   | : Cell-producing virus |

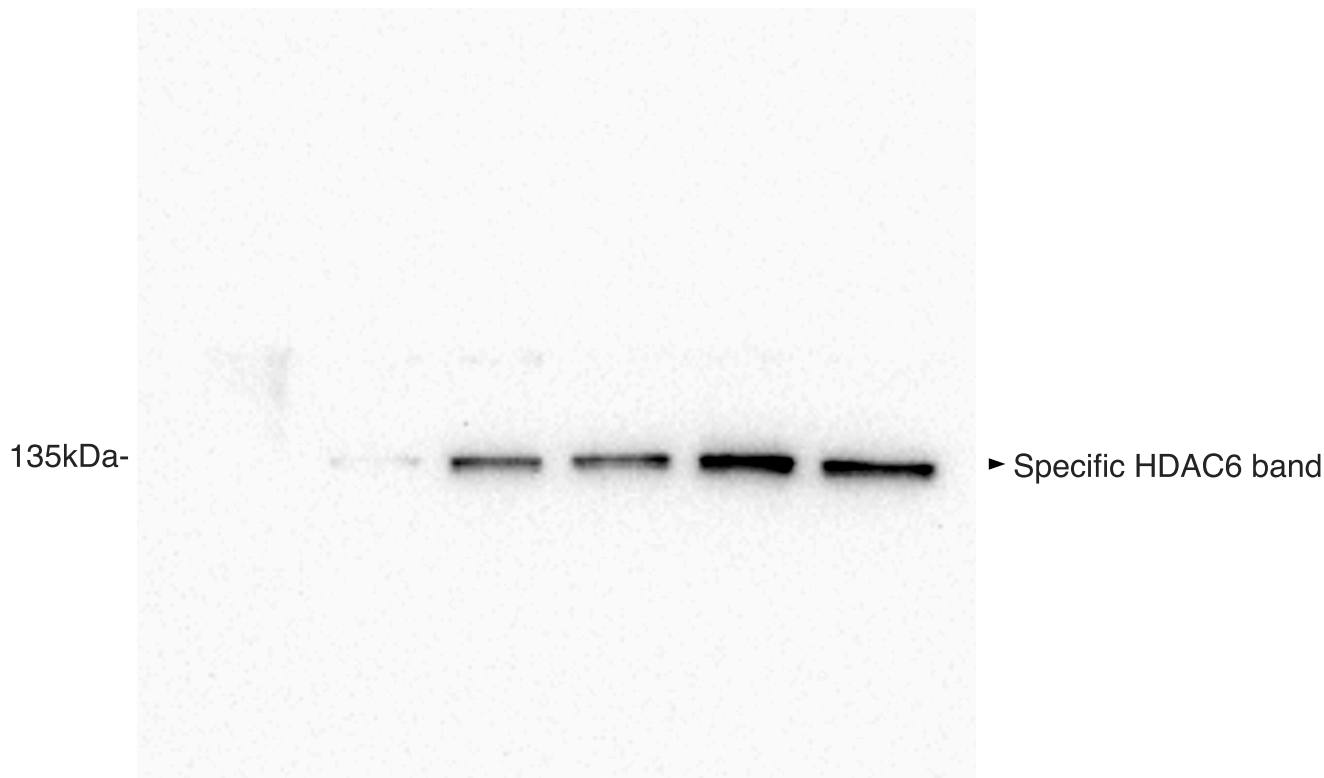

**Figure S2A.** Replicate 3 p62 complete gel Western-blot associated with Figure 2A  
Cabrera-Rodríguez, R., *et al.*

|   |   |      |     |   |     |                        |
|---|---|------|-----|---|-----|------------------------|
| — | — | 0.25 | 0.5 | 1 | 1.5 | : Flag-wt-TDP-43 (μg)  |
| — | + | +    | +   | + | +   | : Cell-producing virus |

62 kDa -

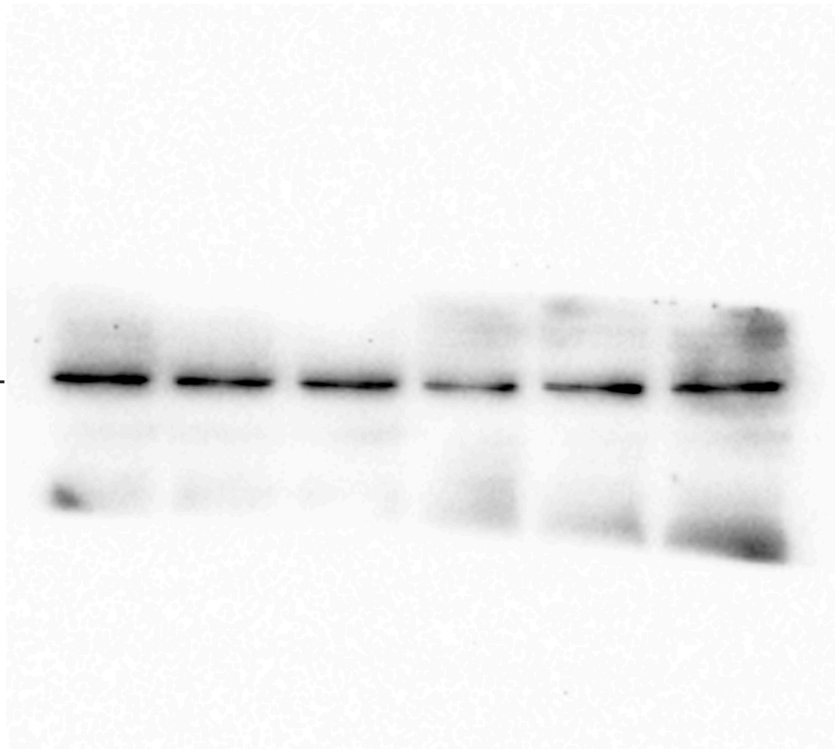

► Specific p62 band

**Figure S2A.** Replicate 3 TDP-43 complete gel Western-blot associated with Figure 2A  
Cabrera-Rodríguez, R., *et al.*

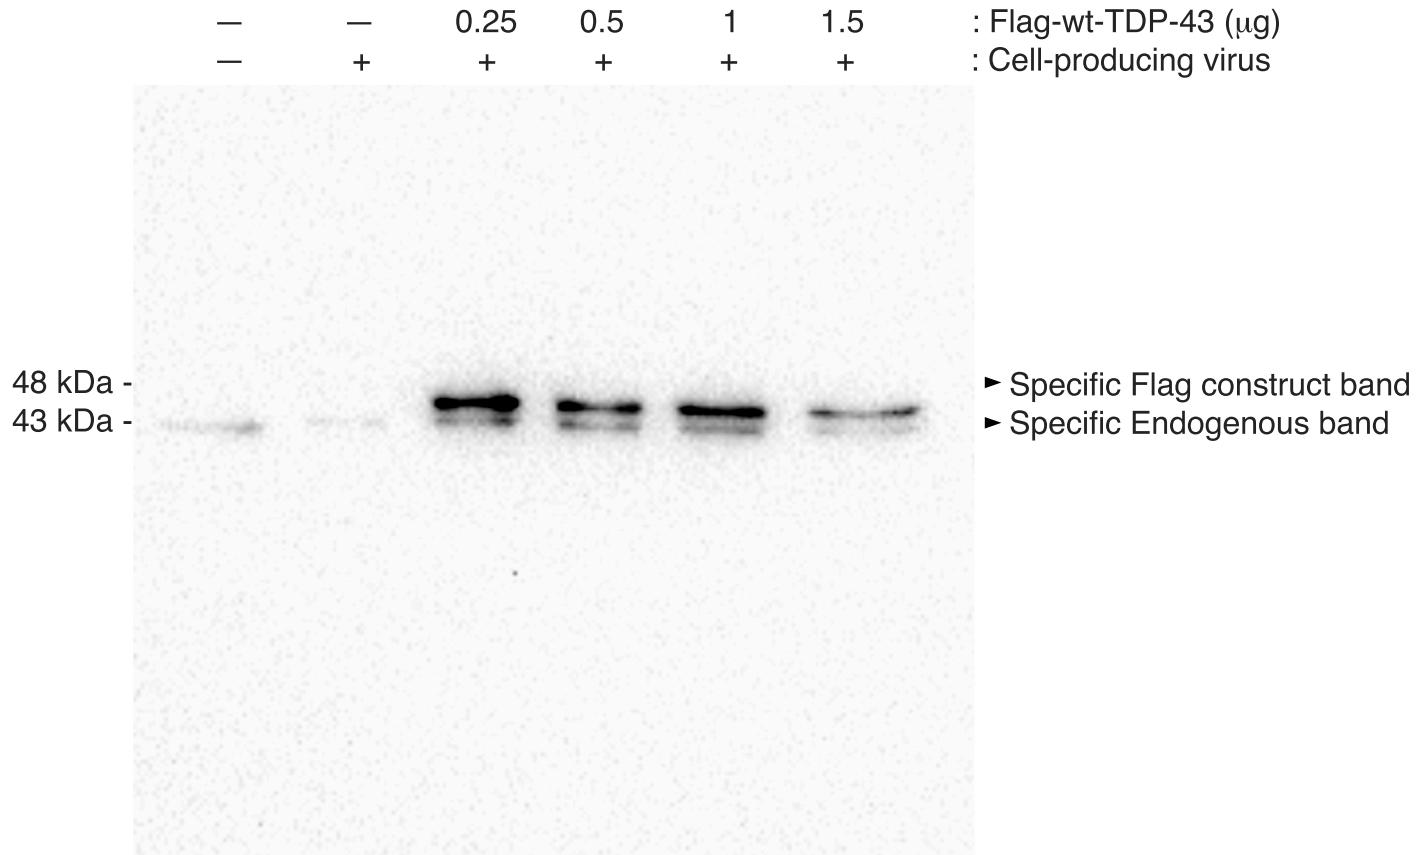



**Figure S2A.** Replicate 3 Pr55<sup>Gag</sup> complete gel Western-blot associated with Figure 2A  
Cabrera-Rodríguez, R., *et al.*

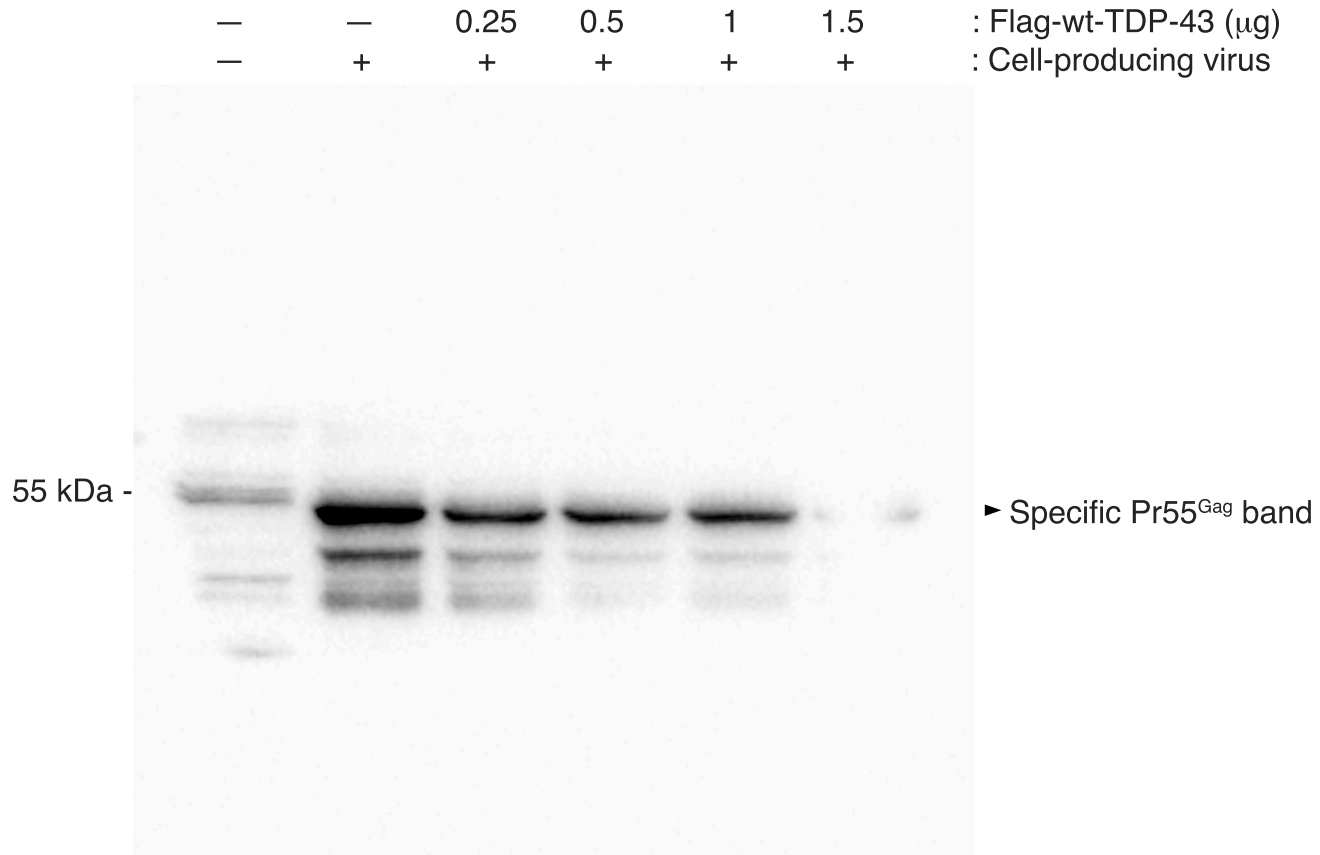

**Figure S2A.** Replicate 3 Vif complete gel      Western-blot associated with Figure 2A  
Cabrera-Rodríguez, R., *et al.*

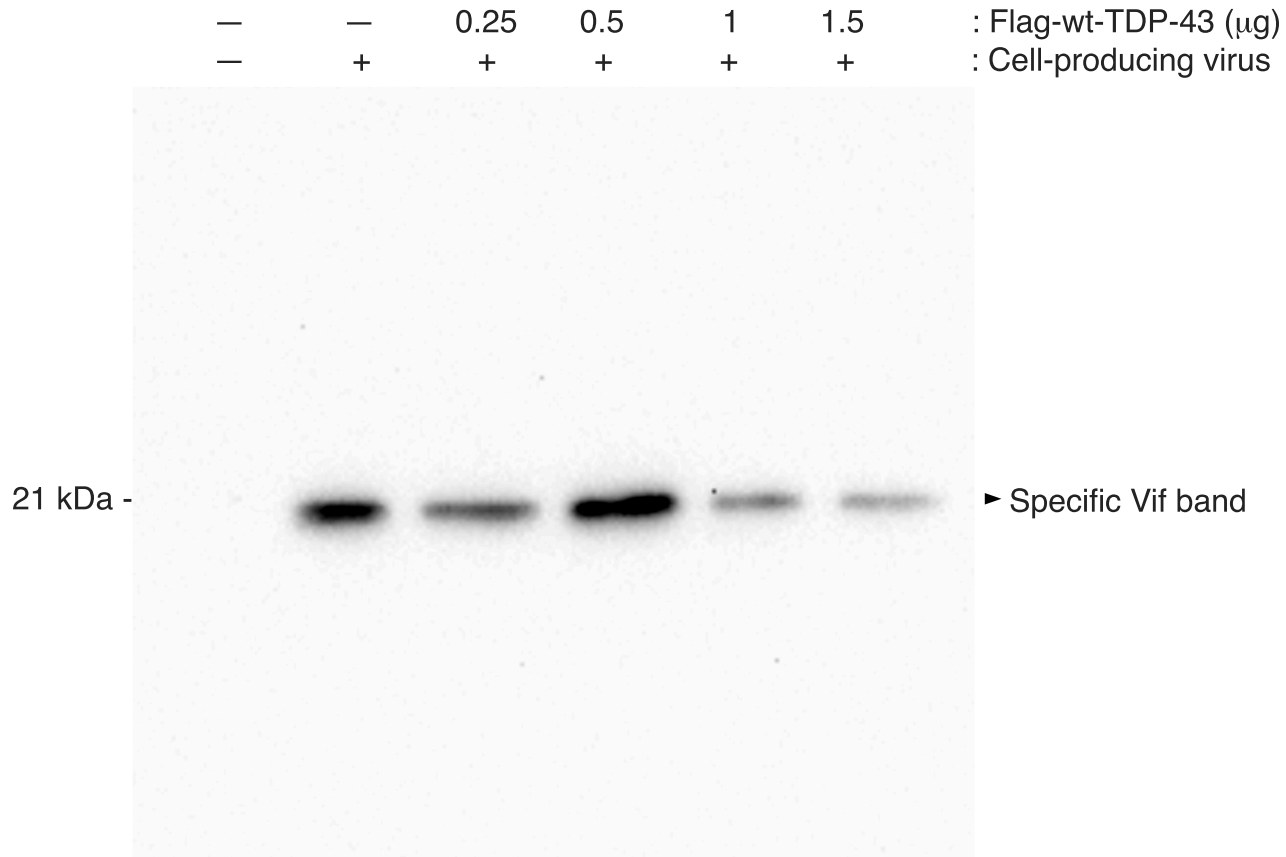

**Figure S2A.** Replicate 3 Acetylated  $\alpha$ -tubulin complete gel Western-blot associated with Figure 2A  
Cabrera-Rodríguez, R., *et al.*

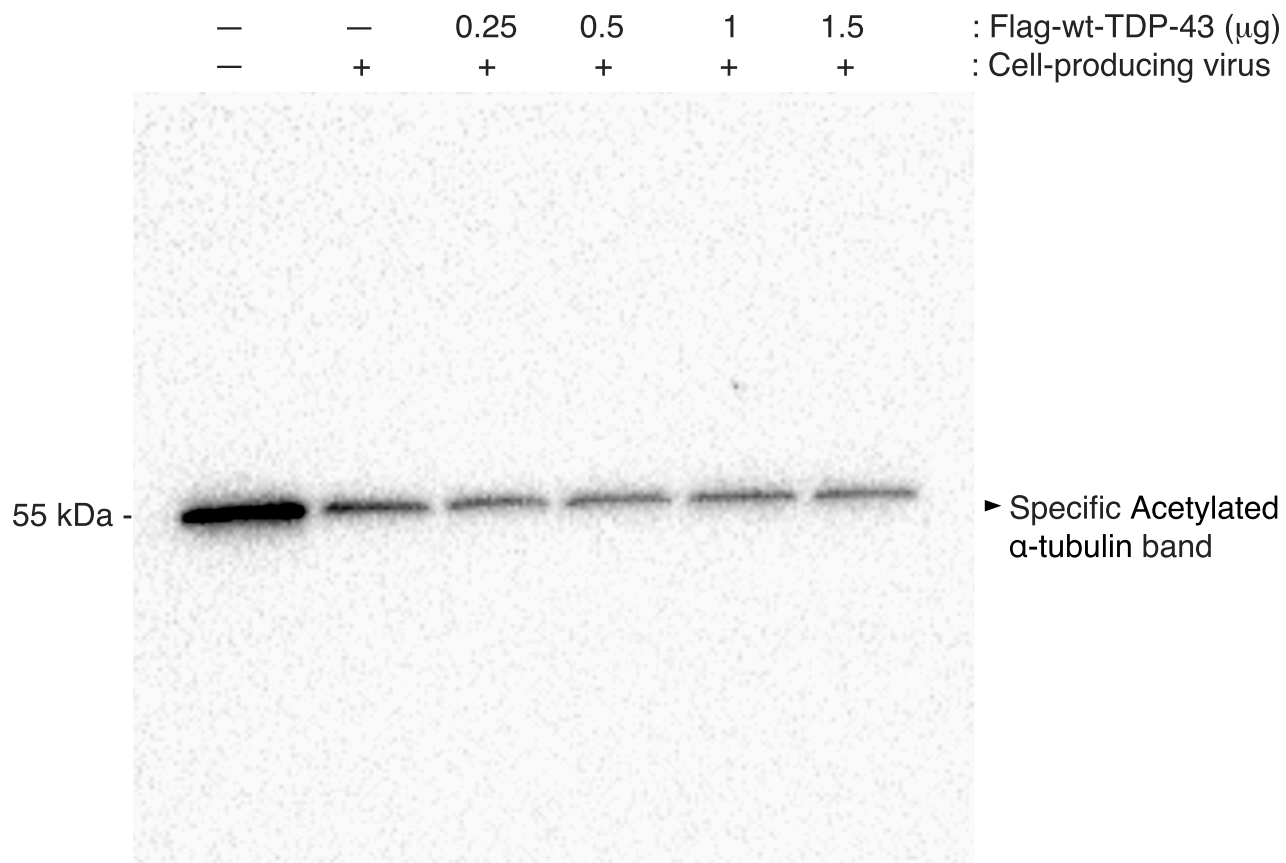

**Figure S2A.** Replicate 3 Total  $\alpha$ -tubulin complete gel Western-blot associated with Figure 2A  
Cabrera-Rodríguez, R., *et al.*

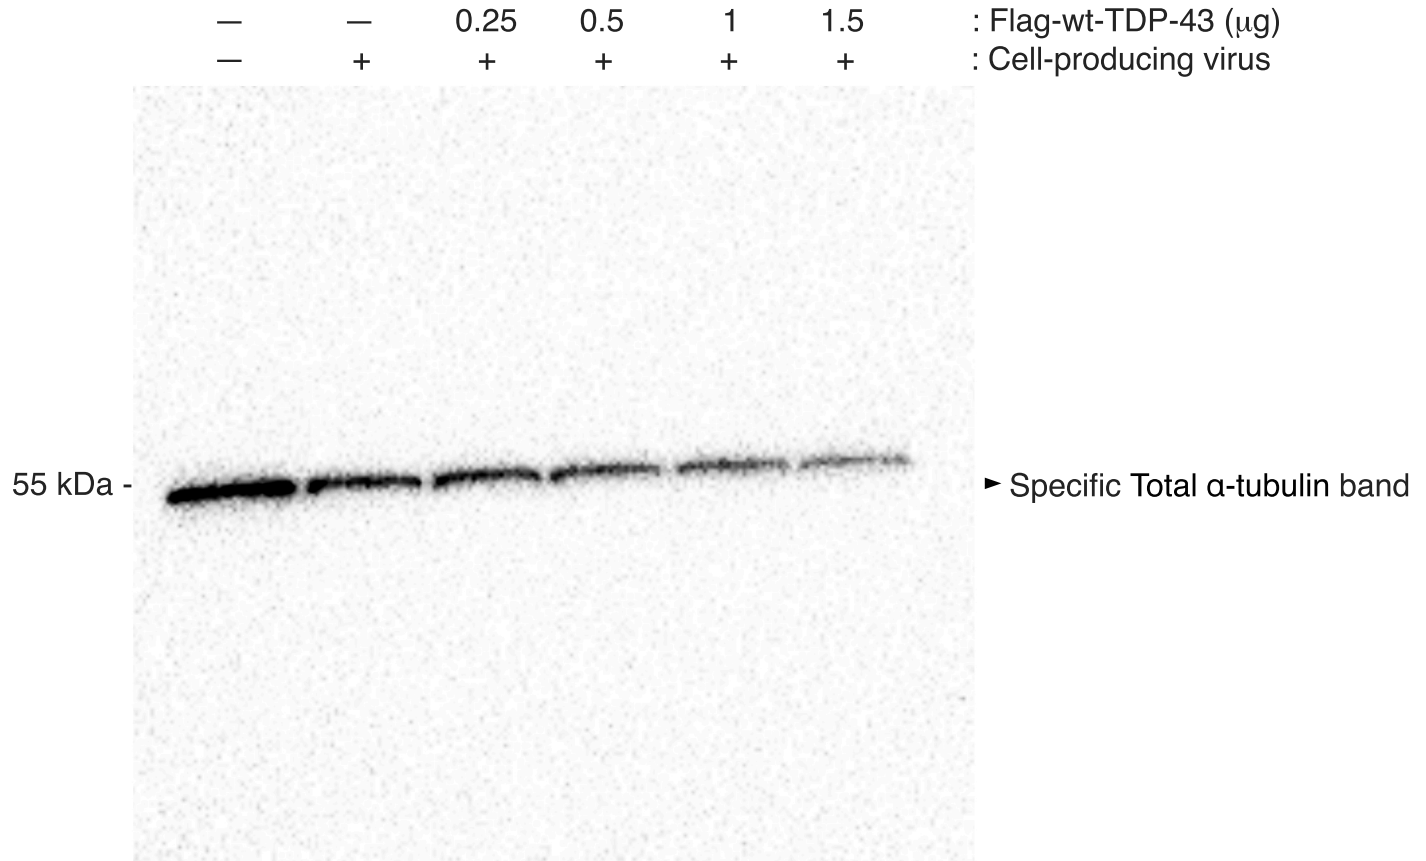

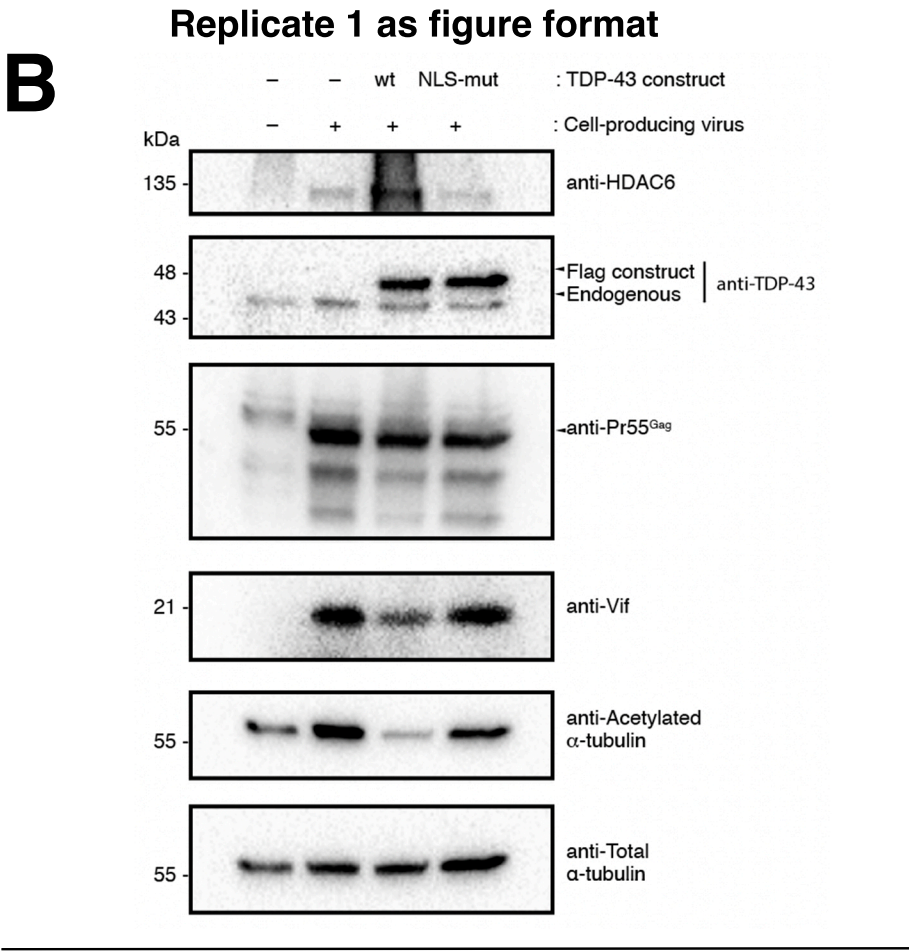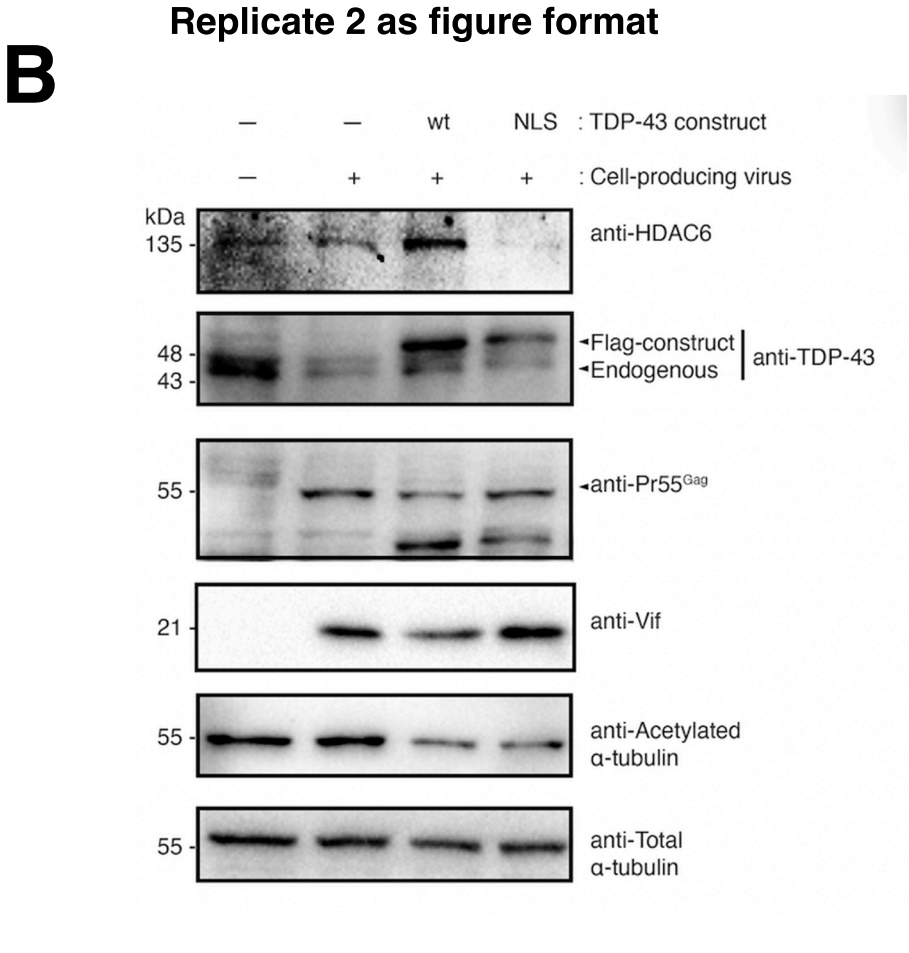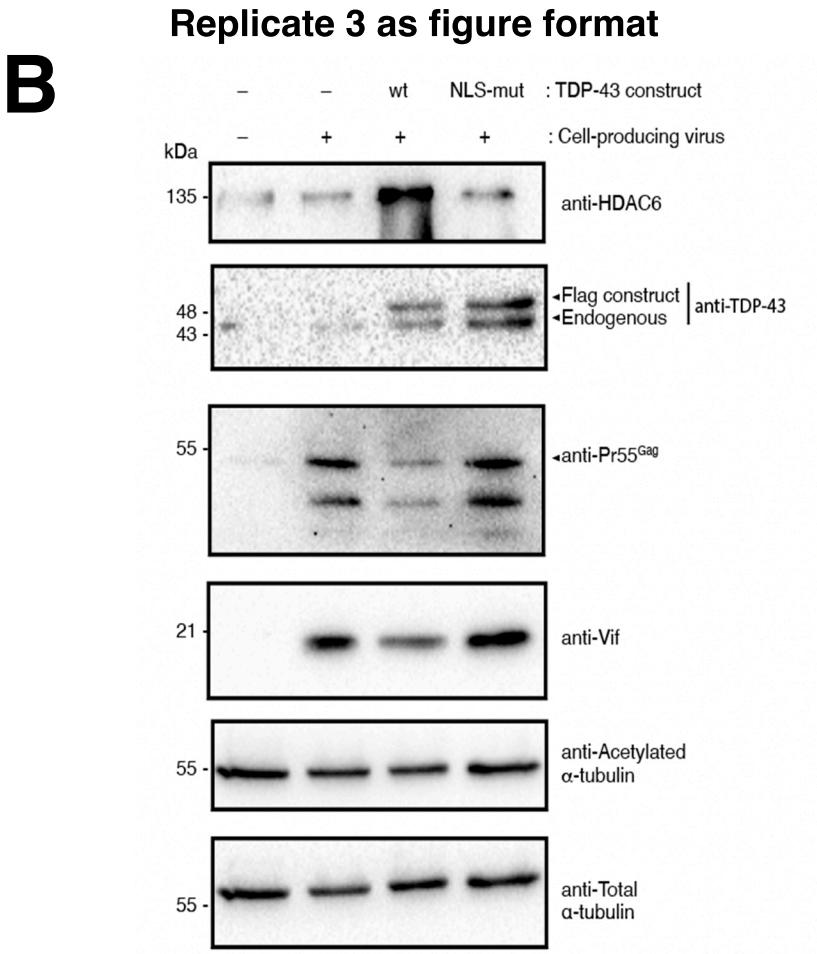

**Figure S2B.** Replicate 1 HDAC6 complete gel Western-blot associated with Figure 2B  
Cabrera-Rodríguez, R., *et al.*

|   |   |    |         |                        |
|---|---|----|---------|------------------------|
| — | — | wt | NLS-mut | : TDP-43 construct     |
| — | + | +  | +       | : Cell-producing virus |

135kDa-

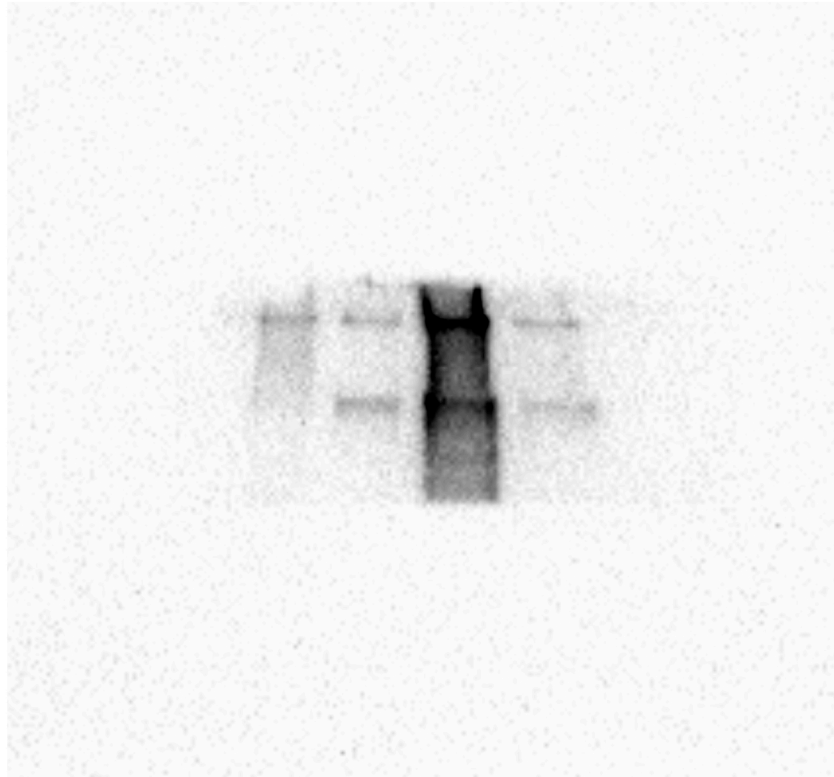

► Specific HDAC6 band

**Figure S2B.** Replicate 1 TDP-43 complete gel Western-blot associated with Figure 2B  
Cabrera-Rodríguez, R., *et al.*

|   |   |    |         |                        |
|---|---|----|---------|------------------------|
| — | — | wt | NLS-mut | : TDP-43 construct     |
| — | + | +  | +       | : Cell-producing virus |

48 kDa -  
43 kDa -

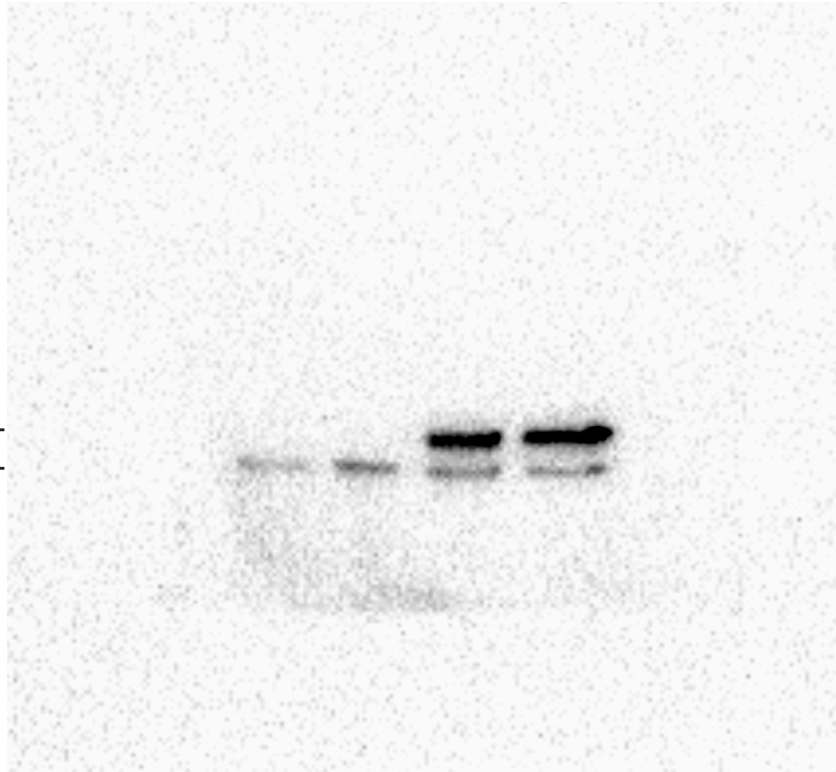

► Specific Flag construct band  
► Specific Endogenous band

**Figure S2B.** Replicate 1 Pr55<sup>Gag</sup> complete gel Western-blot associated with Figure 2B  
Cabrera-Rodríguez, R., *et al.*

|   |   |    |         |                        |
|---|---|----|---------|------------------------|
| — | — | wt | NLS-mut | : TDP-43 construct     |
| — | + | +  | +       | : Cell-producing virus |

55 kDa -

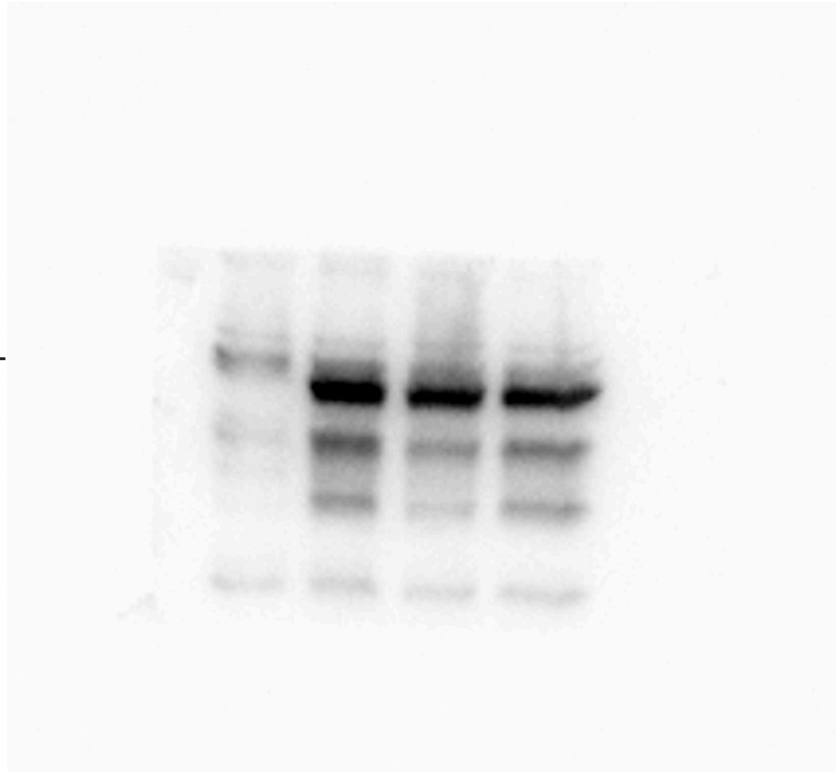

► Specific Pr55<sup>Gag</sup> band



**Figure S2B.** Replicate 1 Vif complete gel Western-blot associated with Figure 2B  
Cabrera-Rodríguez, R., *et al.*

|   |   |    |         |                        |
|---|---|----|---------|------------------------|
| — | — | wt | NLS-mut | : TDP-43 construct     |
| — | + | +  | +       | : Cell-producing virus |

21 kDa -

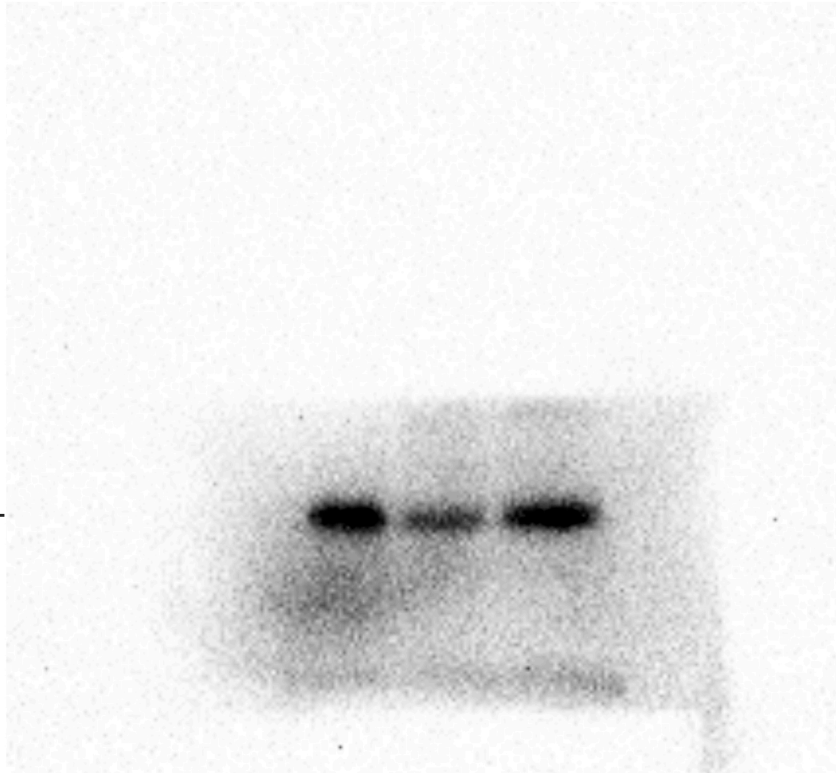

► Specific Vif band

**Figure S2B.** Replicate 1 Acetylated  $\alpha$ -tubulin complete gel Western-blot associated with Figure 2B  
Cabrera-Rodríguez, R., *et al.*

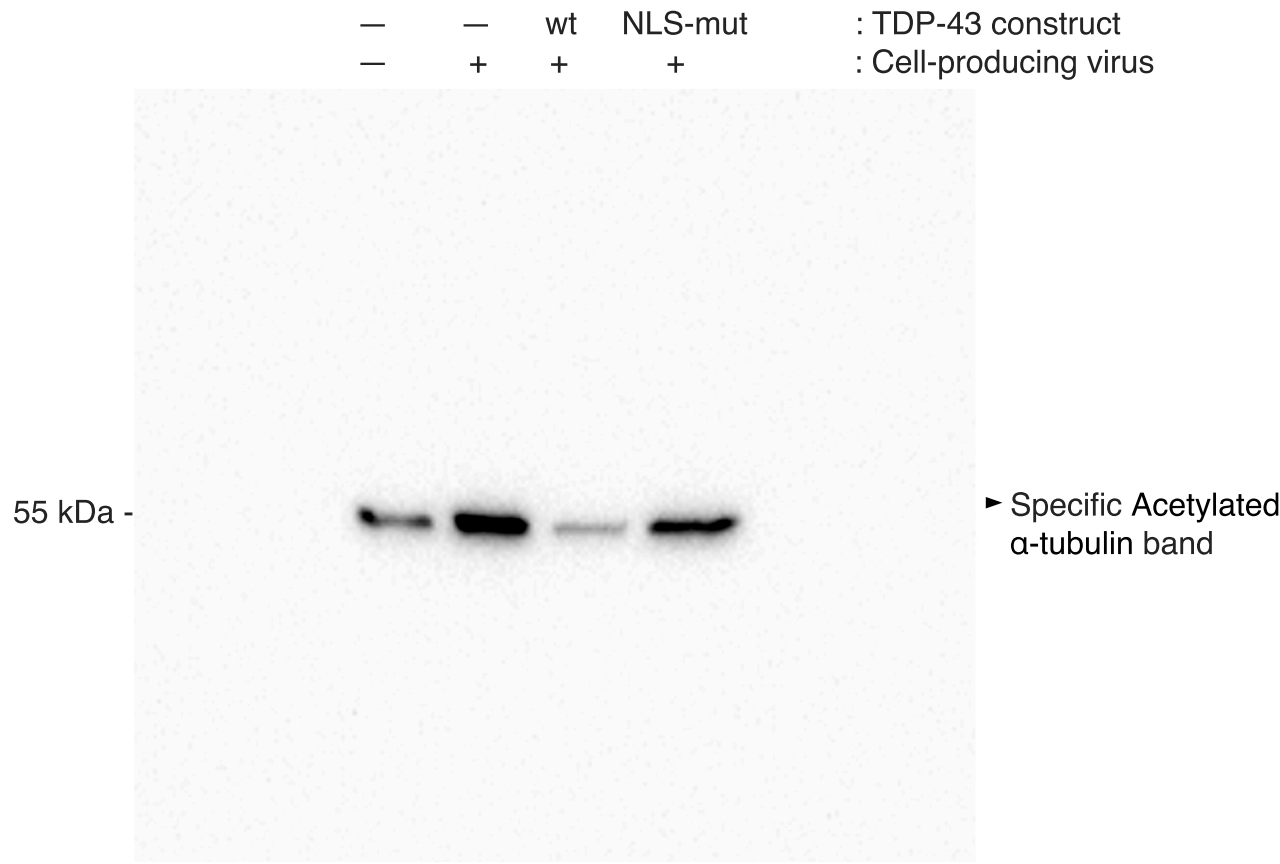

**Figure S2B.** Replicate 1 Total  $\alpha$ -tubulin complete gel Western-blot associated with Figure 2B  
Cabrera-Rodríguez, R., *et al.*

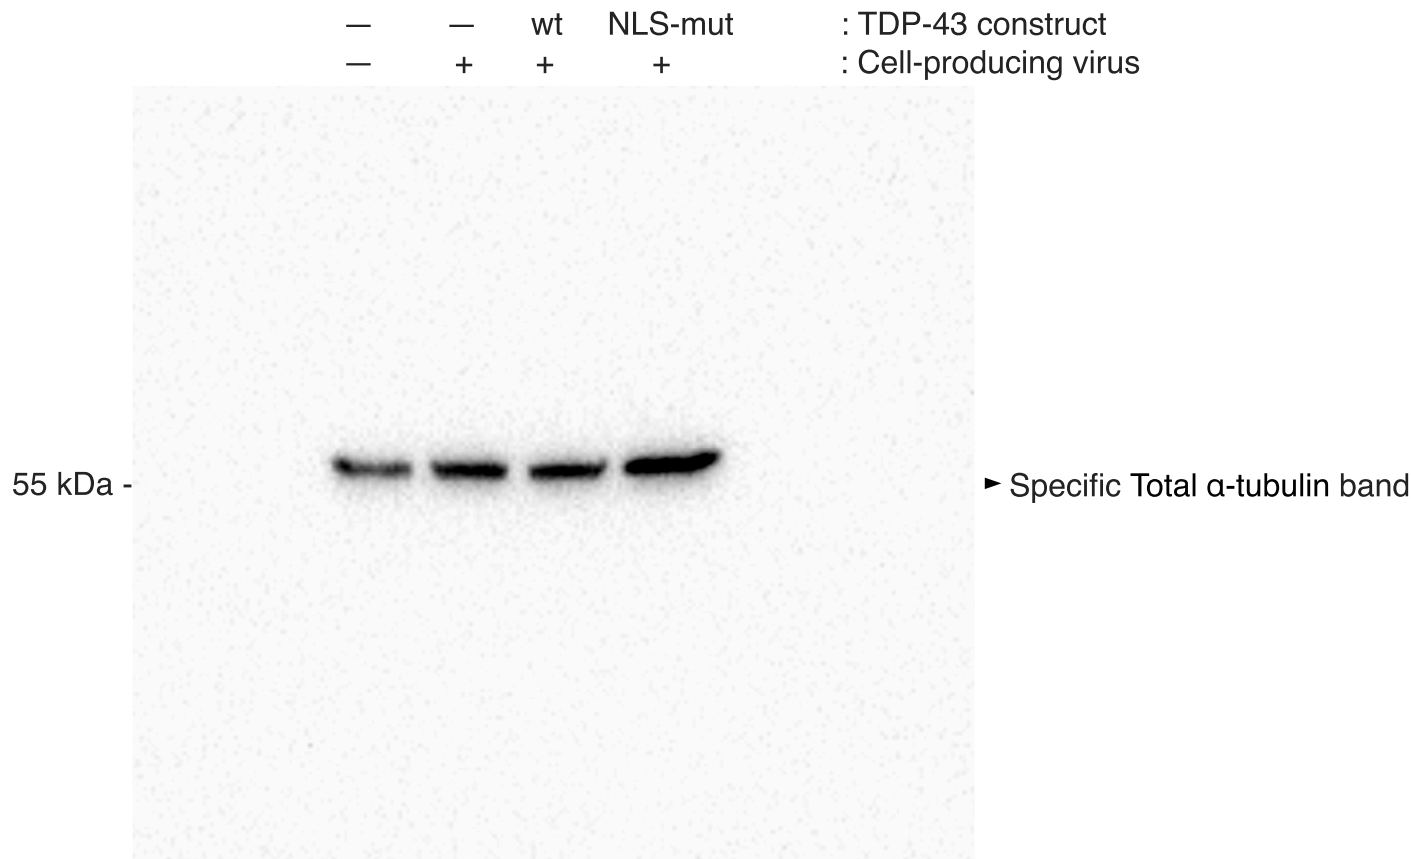

**Figure S2B.** Replicate 2 HDAC6 complete gel Western-blot associated with Figure 2B  
Cabrera-Rodríguez, R., *et al.*

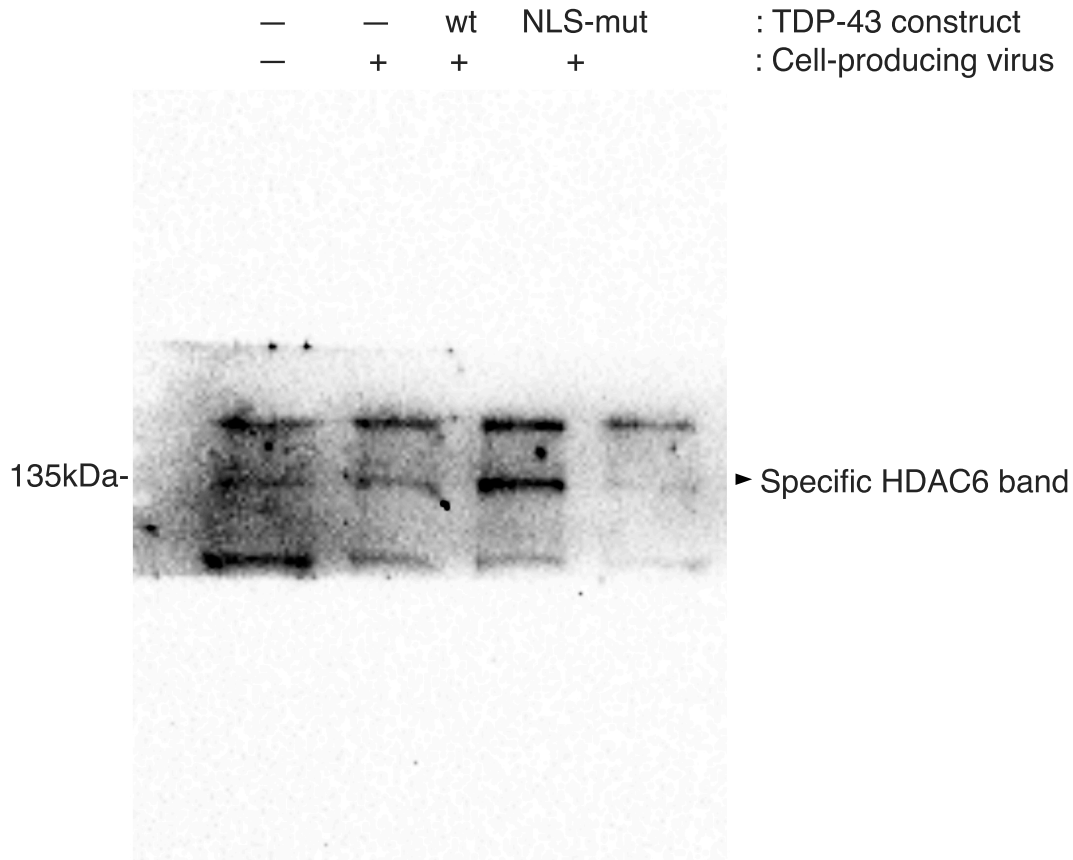

**Figure S2B.** Replicate 2 TDP-43 complete gel Western-blot associated with Figure 2B  
Cabrera-Rodríguez, R., *et al.*

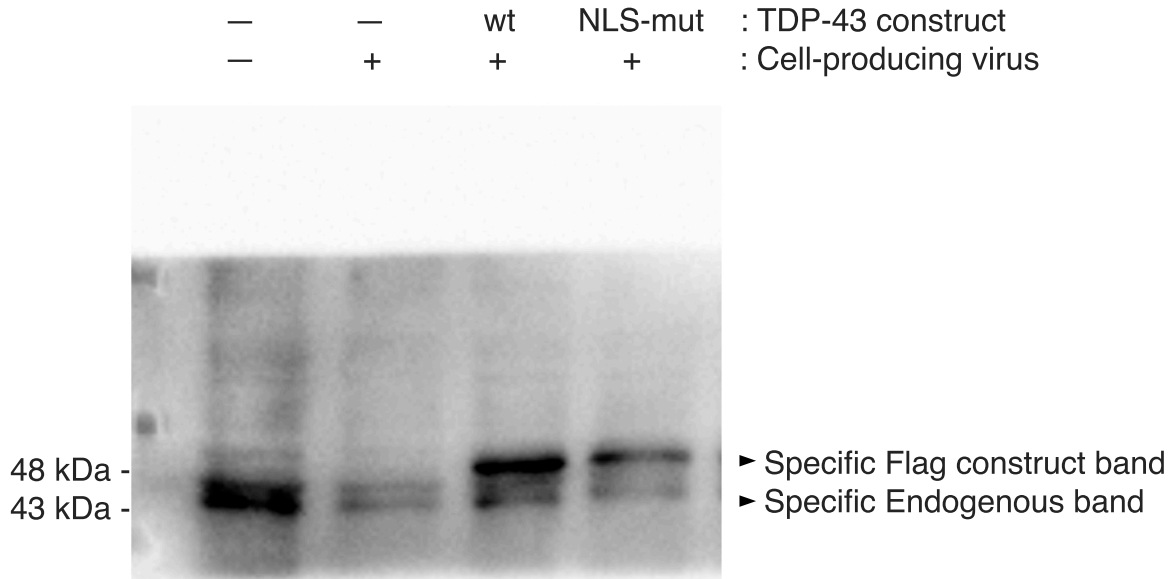

**Figure S2B.** Replicate 2 Pr55<sup>Gag</sup> complete gel

Western-blot associated with Figure 2B  
Cabrera-Rodríguez, R., *et al.*

|   |   |    |         |                        |
|---|---|----|---------|------------------------|
| — | — | wt | NLS-mut | : TDP-43 construct     |
| — | + | +  | +       | : Cell-producing virus |

55 kDa -

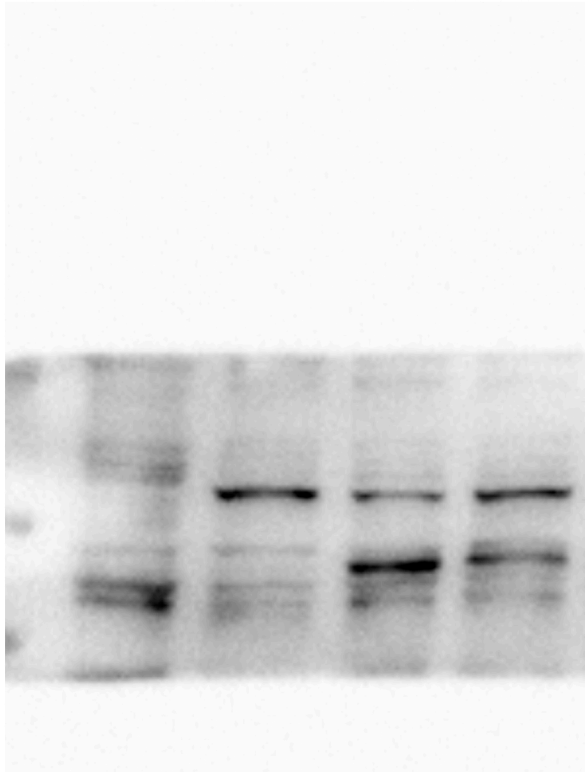

► Specific Pr55<sup>Gag</sup> band

**Figure S2B.** Replicate 2 Vif complete gel Western-blot associated with Figure 2B  
Cabrera-Rodríguez, R., *et al.*

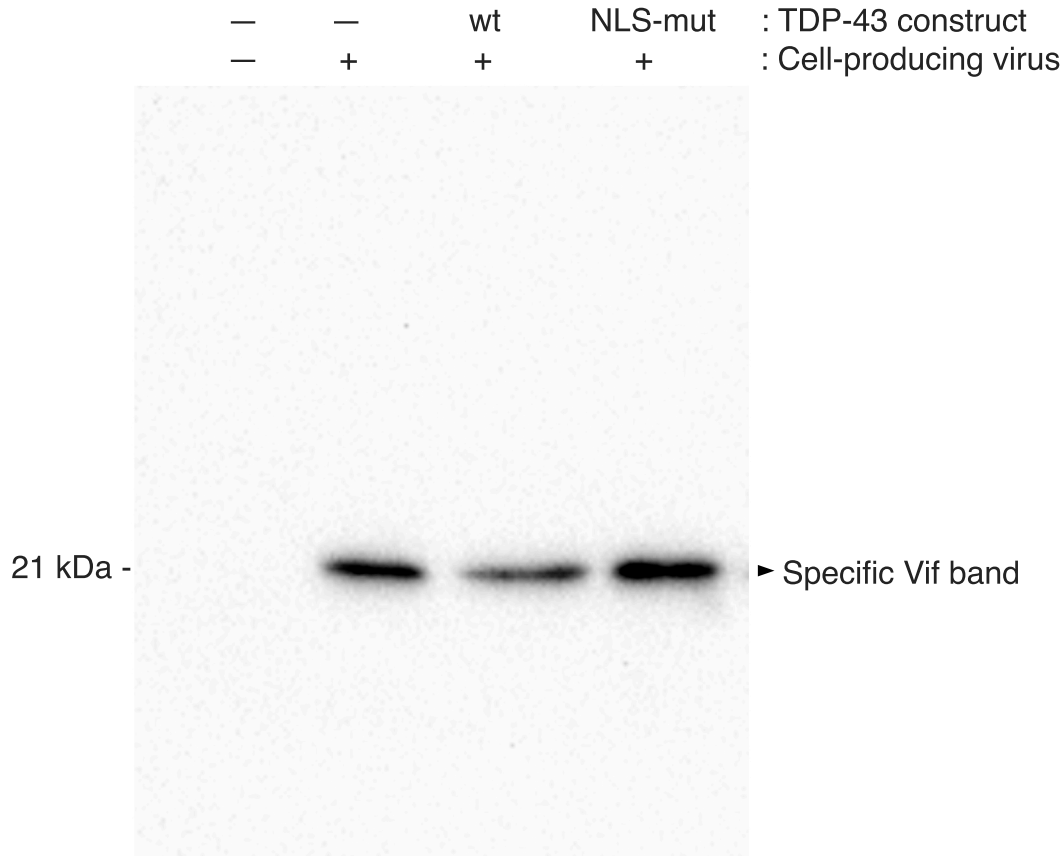

**Figure S2B.** Replicate 2 Acetylated  $\alpha$ -tubulin complete gel Western-blot associated with Figure 2B  
Cabrera-Rodríguez, R., *et al.*

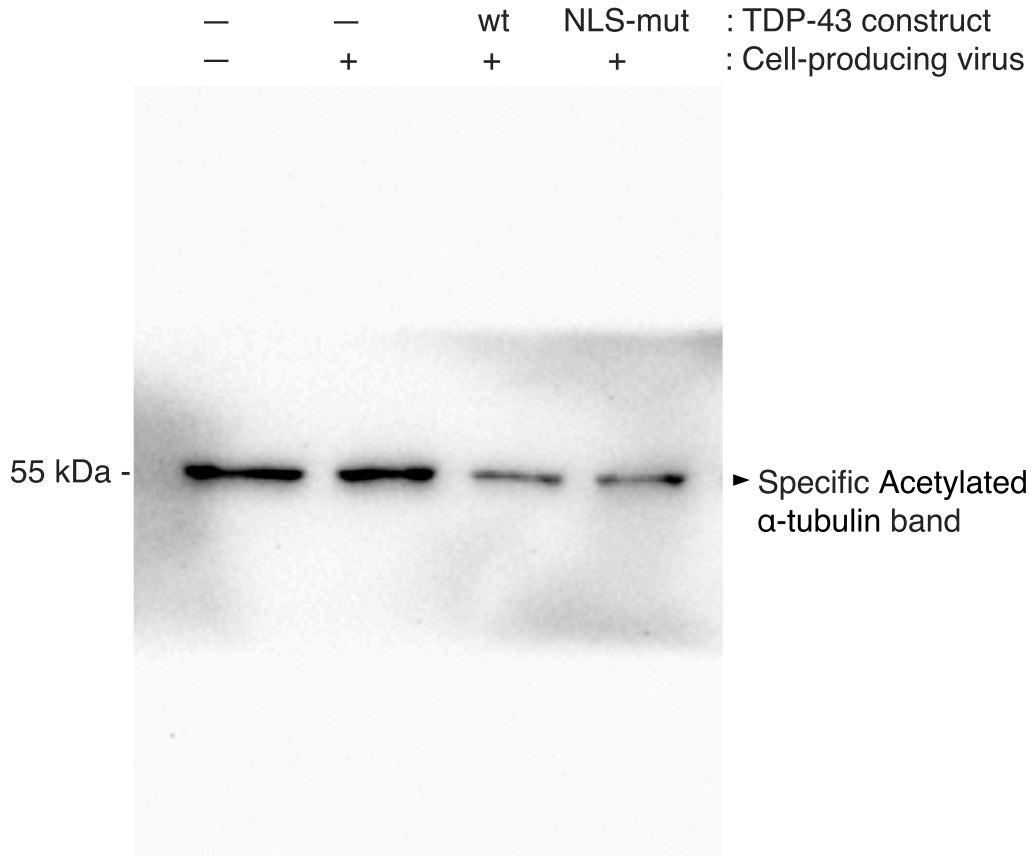



**Figure S2B.** Replicate 2 Total  $\alpha$ -tubulin complete gel Western-blot associated with Figure 2B  
Cabrera-Rodríguez, R., *et al.*

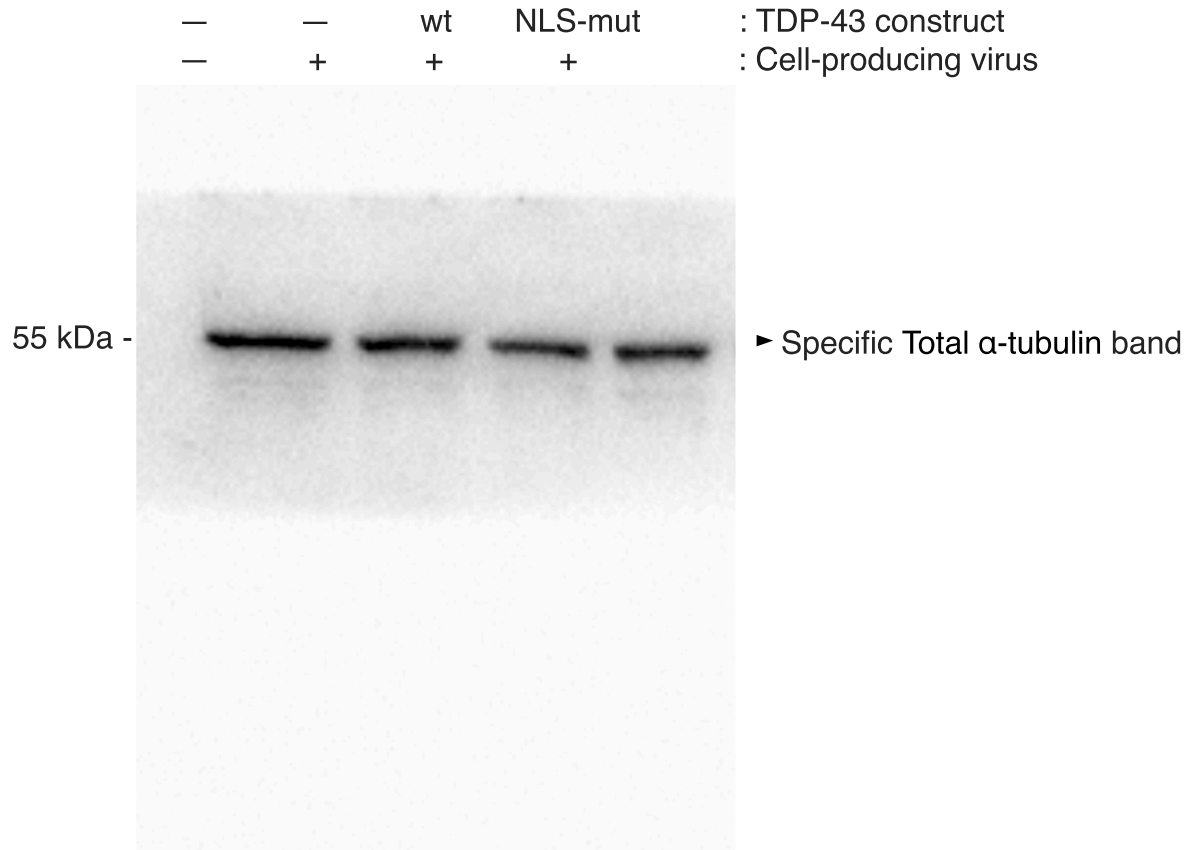

**Figure S2B.** Replicate 3 HDAC6 complete gel Western-blot associated with Figure 2B  
Cabrera-Rodríguez, R., *et al.*

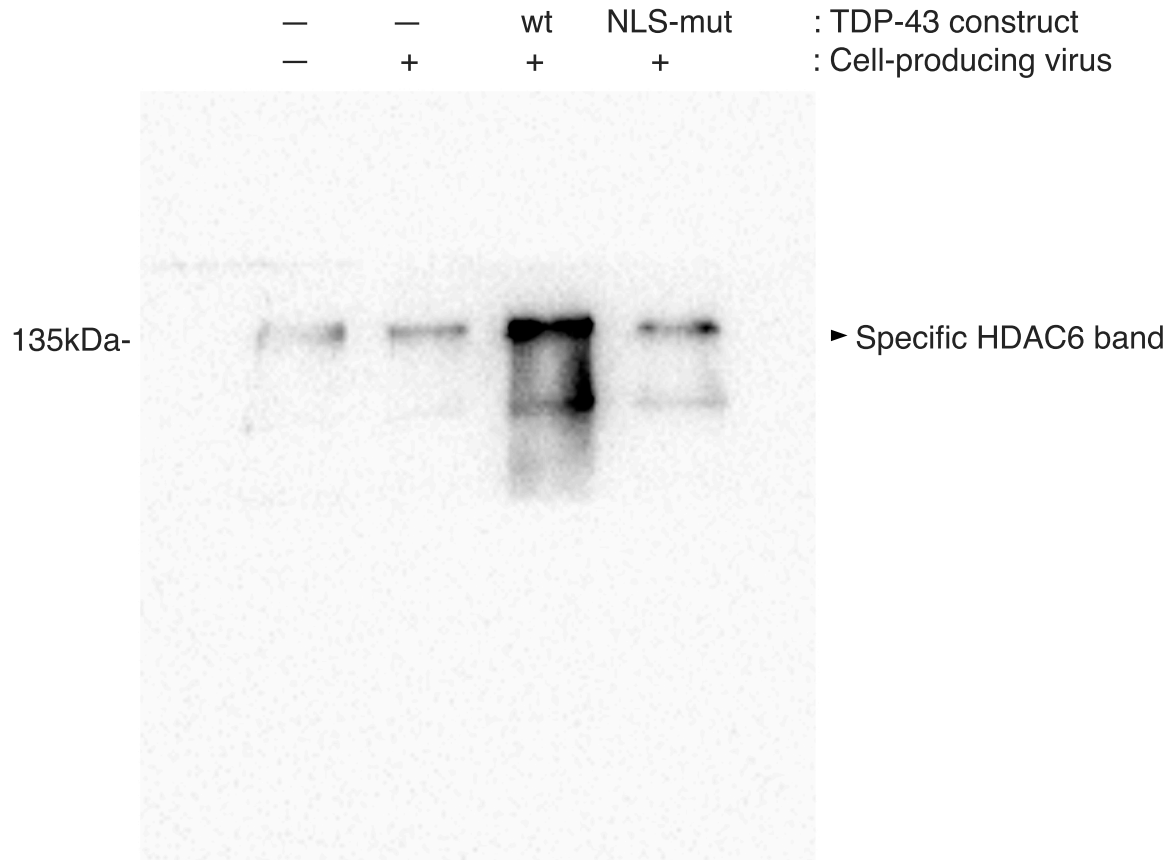

**Figure S2B.** Replicate 3 TDP-43 complete gel Western-blot associated with Figure 2B  
Cabrera-Rodríguez, R., *et al.*

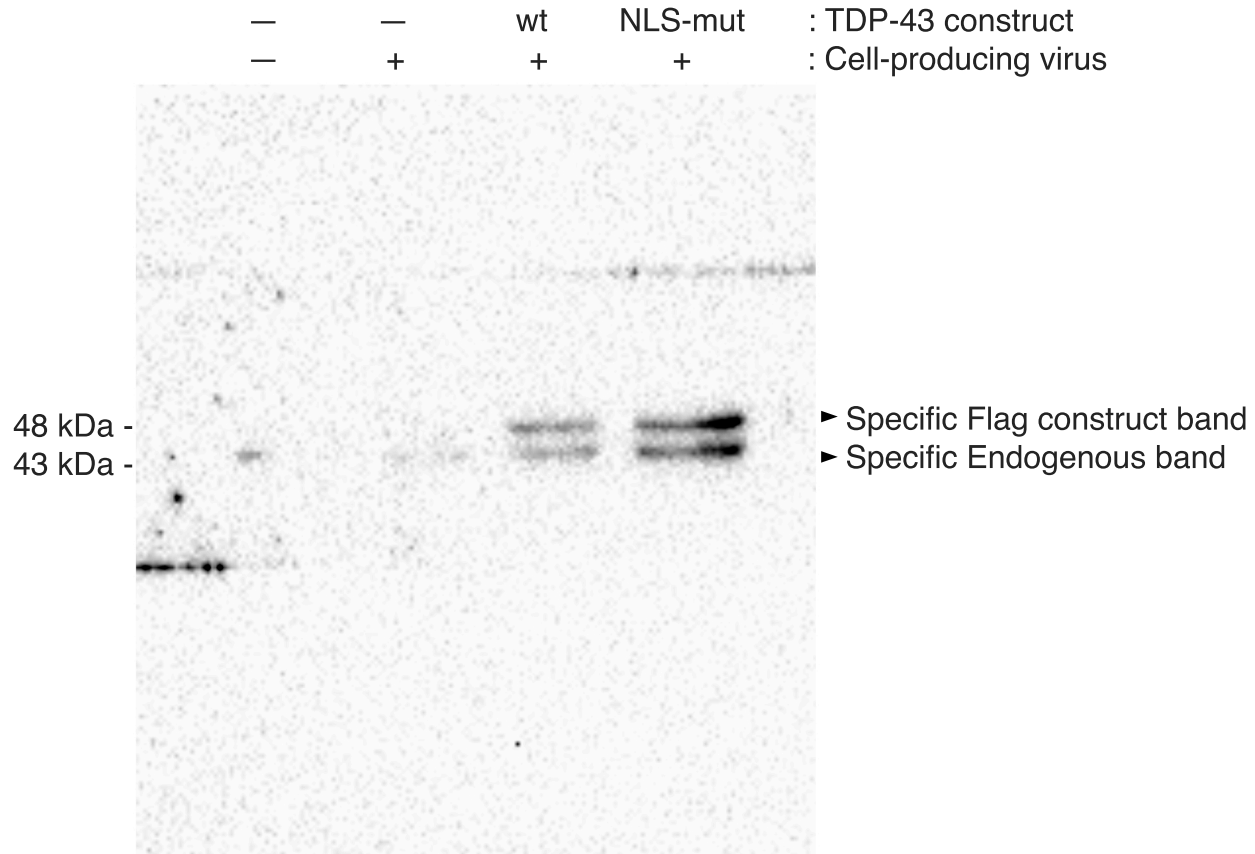

**Figure S2B.** Replicate 3 Pr55<sup>Gag</sup> complete gel Western-blot associated with Figure 2B  
Cabrera-Rodríguez, R., *et al.*

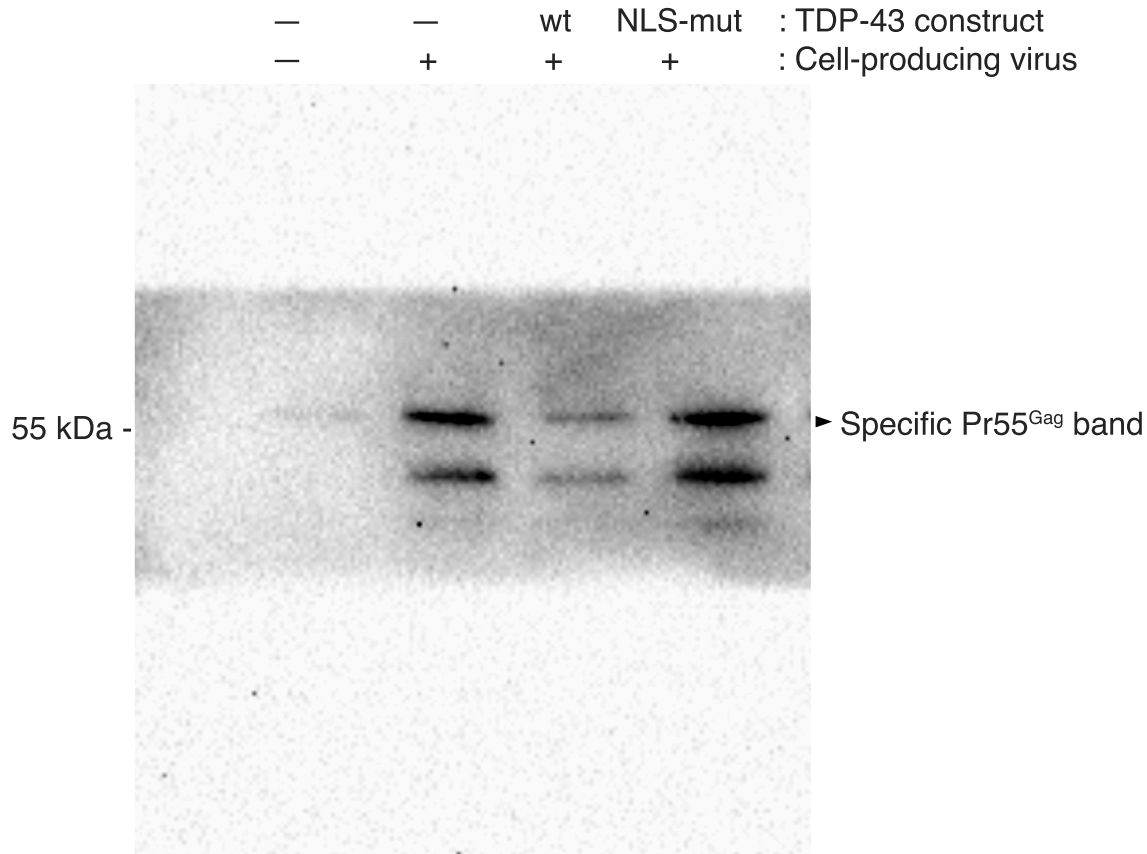

**Figure S2B.** Replicate 3 Vif complete gel Western-blot associated with Figure 2B  
Cabrera-Rodríguez, R., *et al.*

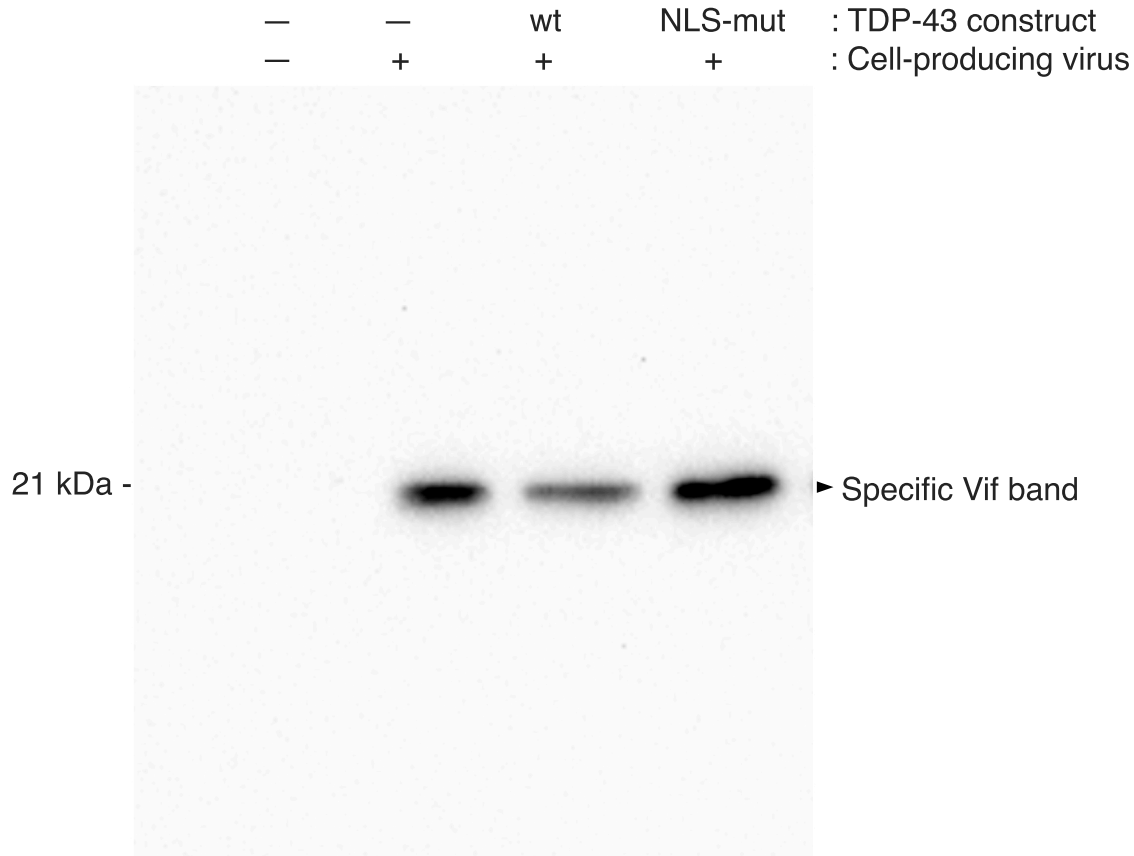

**Figure S2B.** Replicate 3 Acetylated  $\alpha$ -tubulin complete gel

Western-blot associated with Figure 2B  
Cabrera-Rodríguez, R., *et al.*

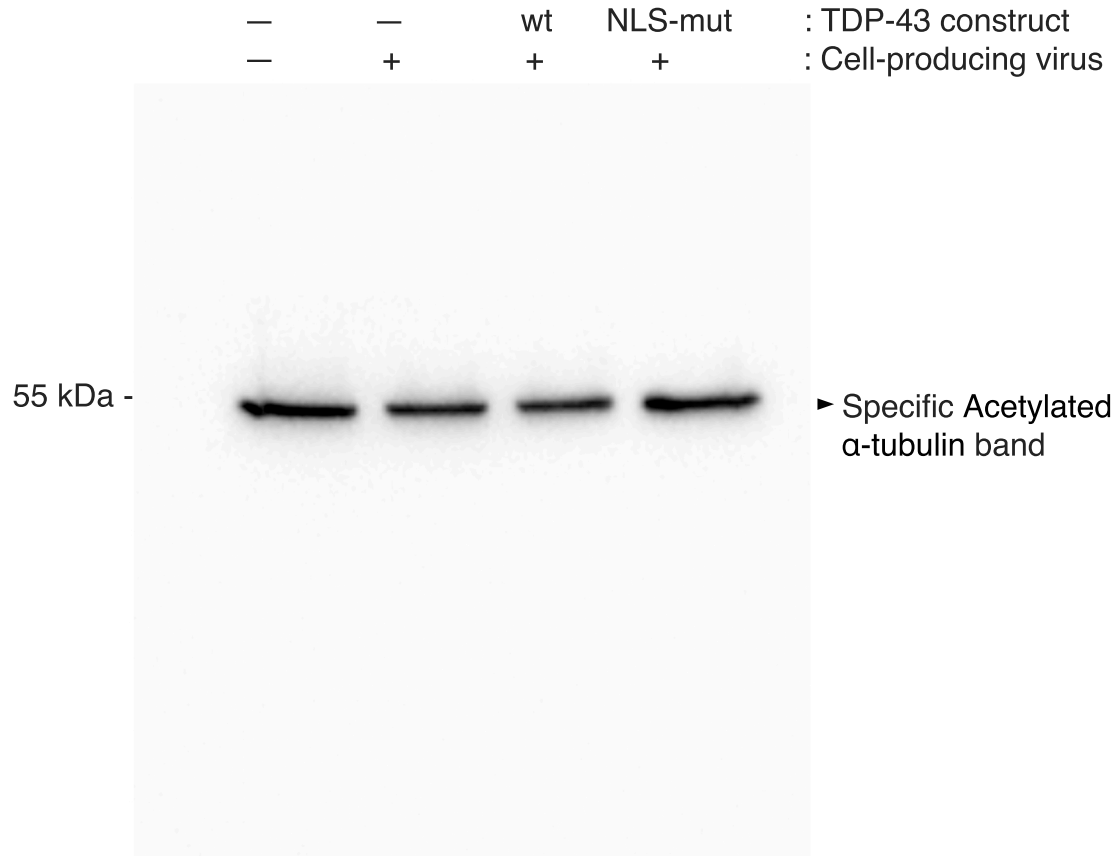

**Figure S2B.** Replicate 3 Total  $\alpha$ -tubulin complete gel Western-blot associated with Figure 2B  
Cabrera-Rodríguez, R., *et al.*

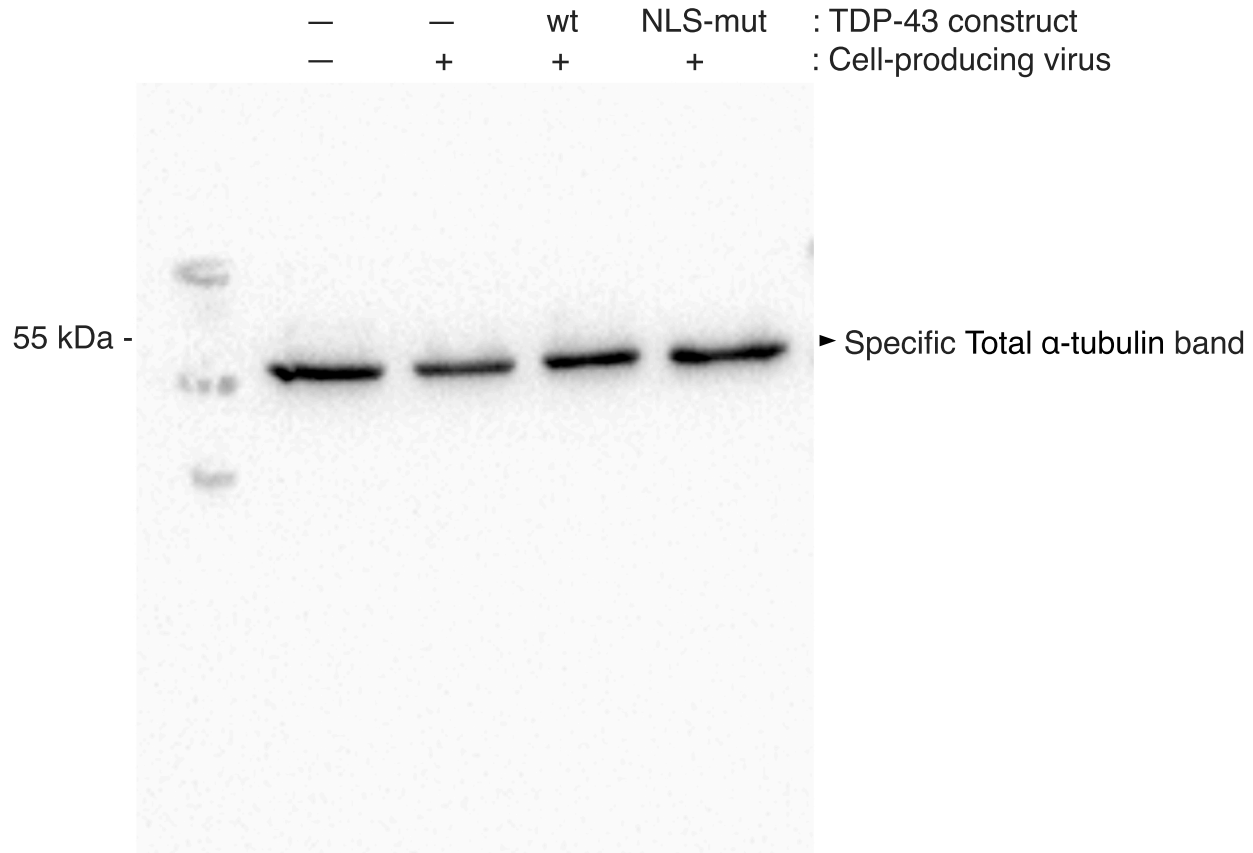

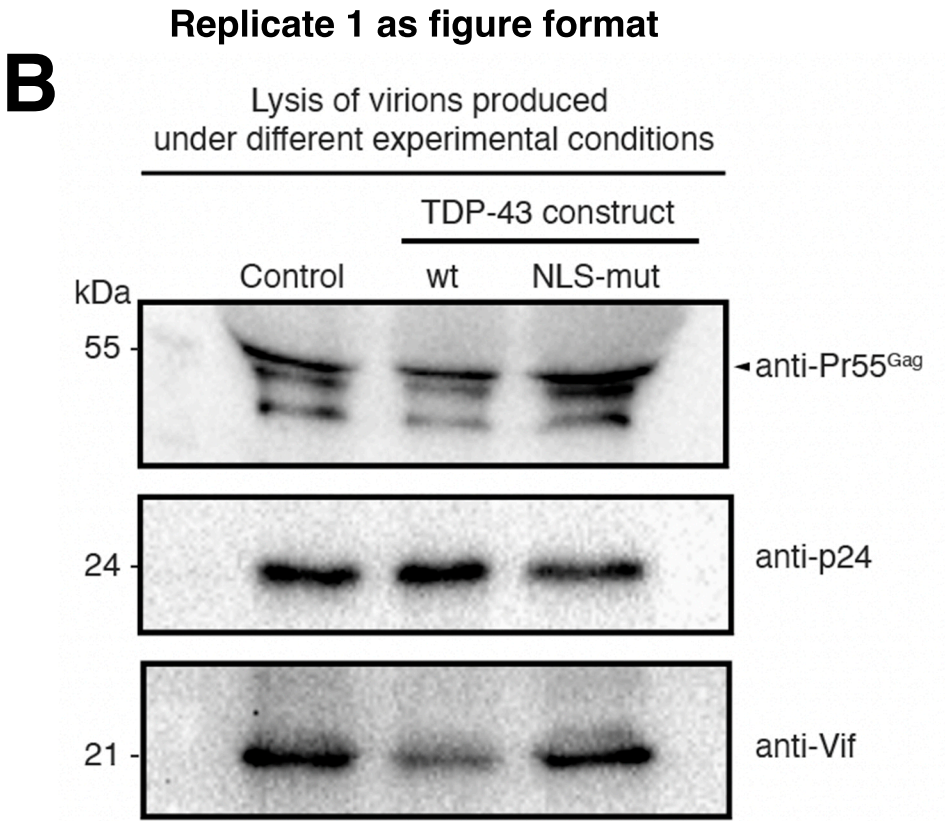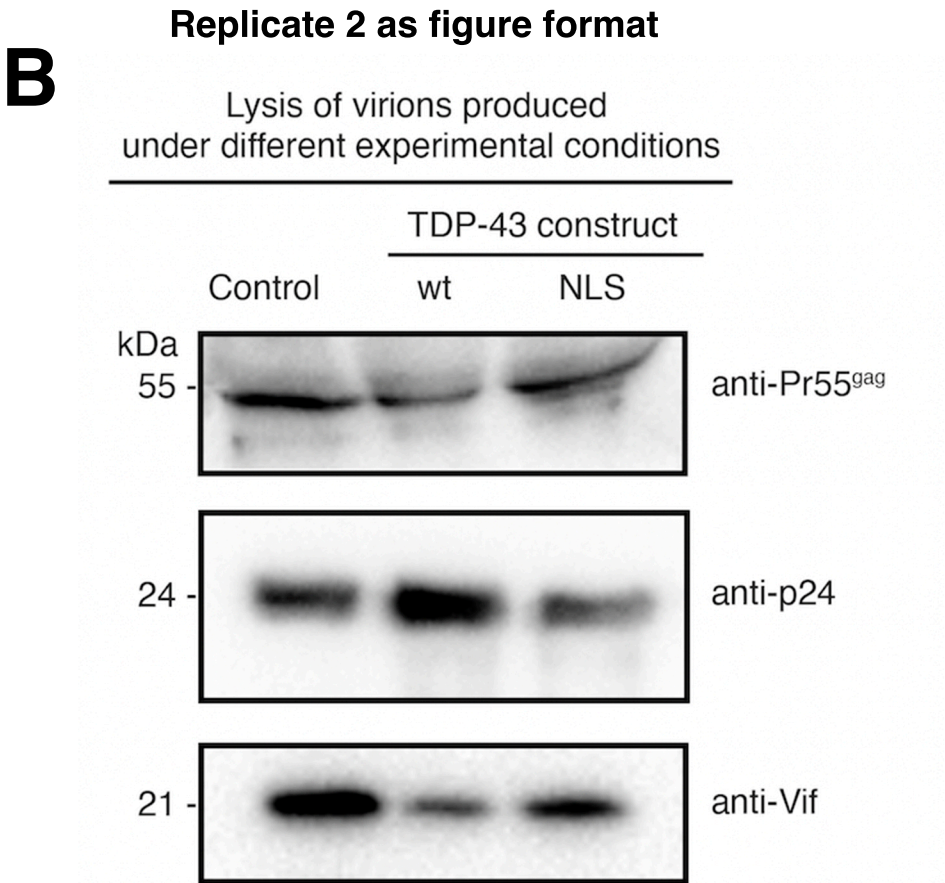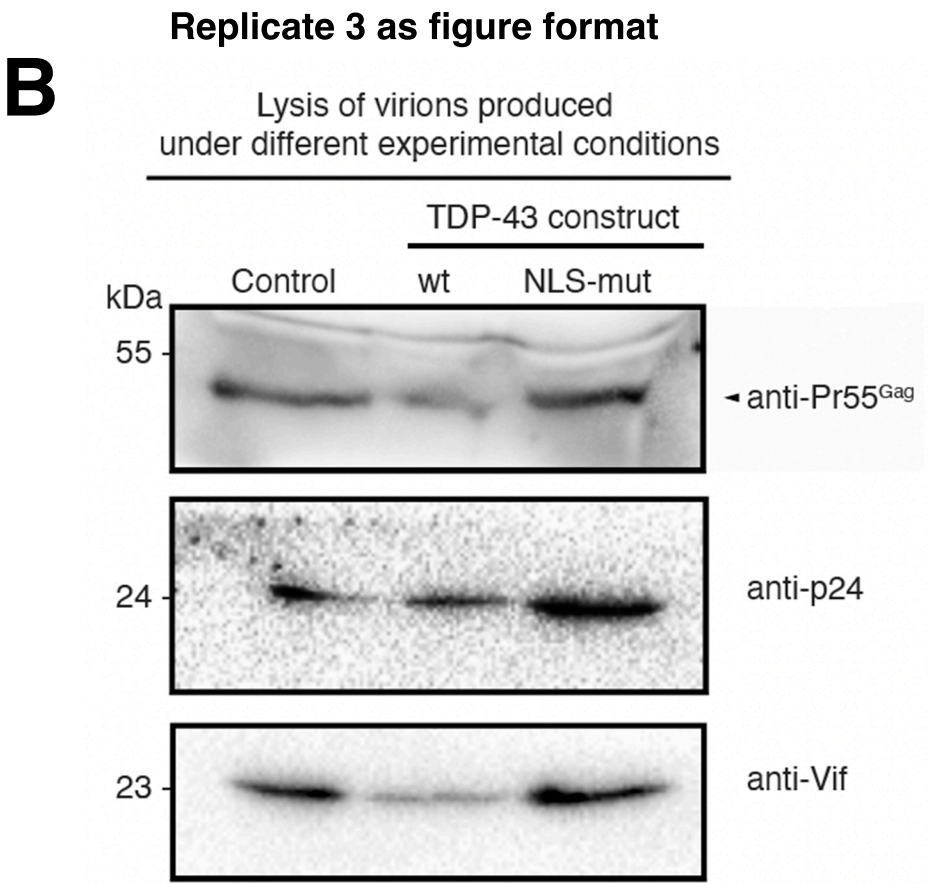



**Figure S3.** Replicate 1 Pr55<sup>Gag</sup> complete gel Western-blot associated with Figure 3B  
Cabrera-Rodríguez, R., *et al.*

Lysis of virions produced  
under different experimental conditions

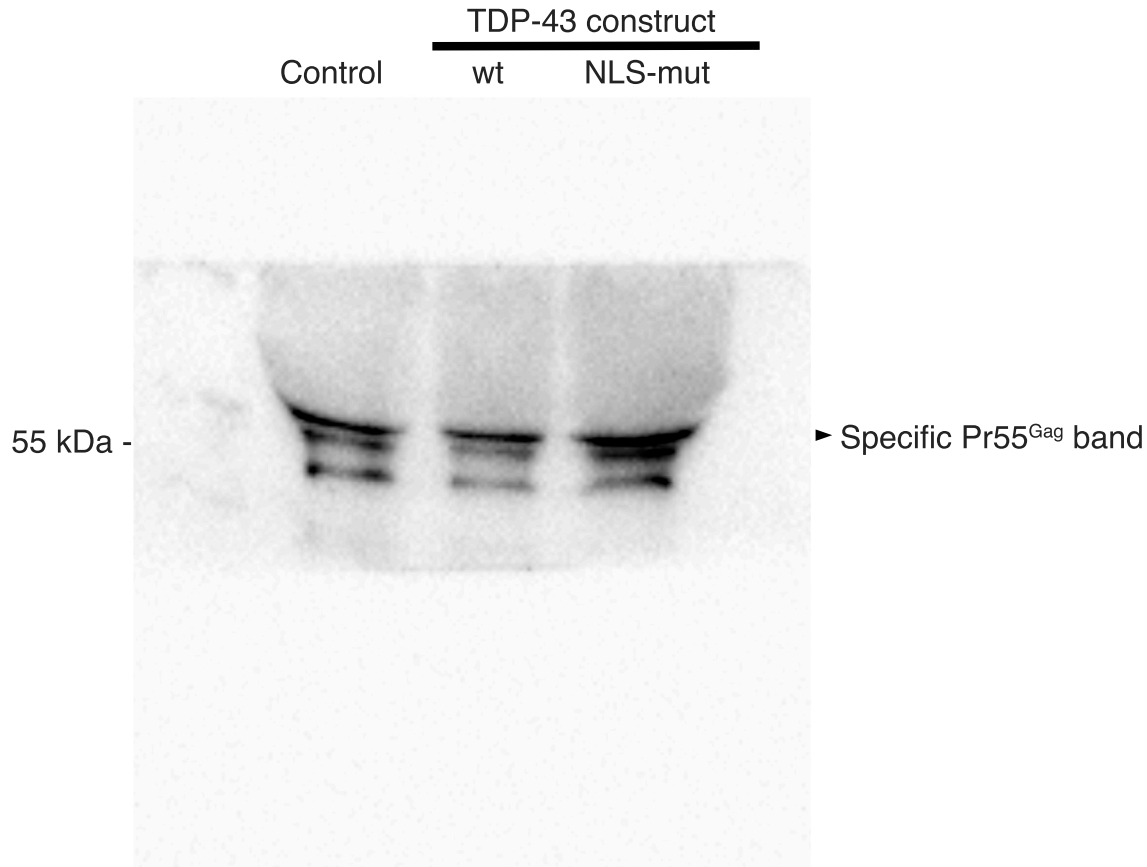

**Figure S3.** Replicate 1 p24 complete gel Western-blot associated with Figure 3B  
Cabrera-Rodríguez, R., *et al.*

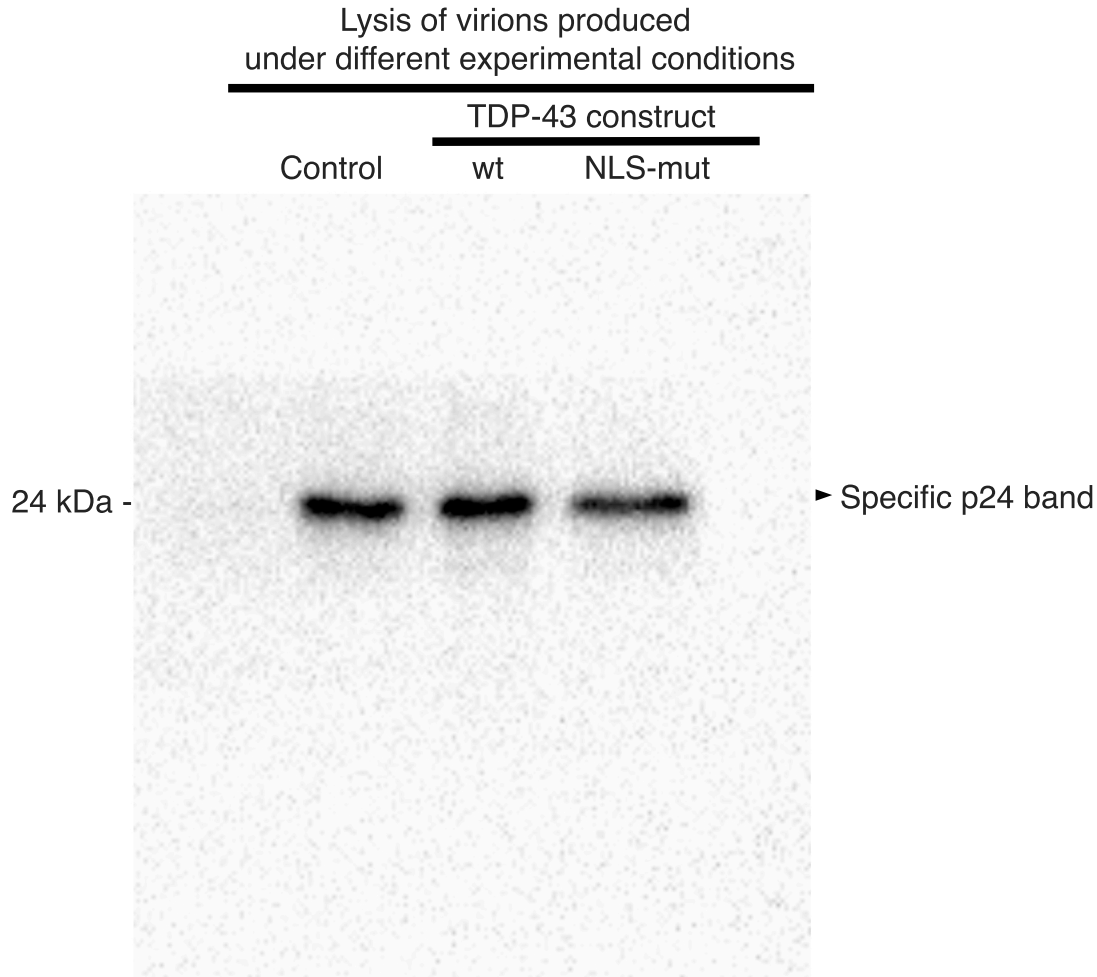

**Figure S3.** Replicate 1 Vif complete gel Western-blot associated with Figure 3B  
Cabrera-Rodríguez, R., *et al.*

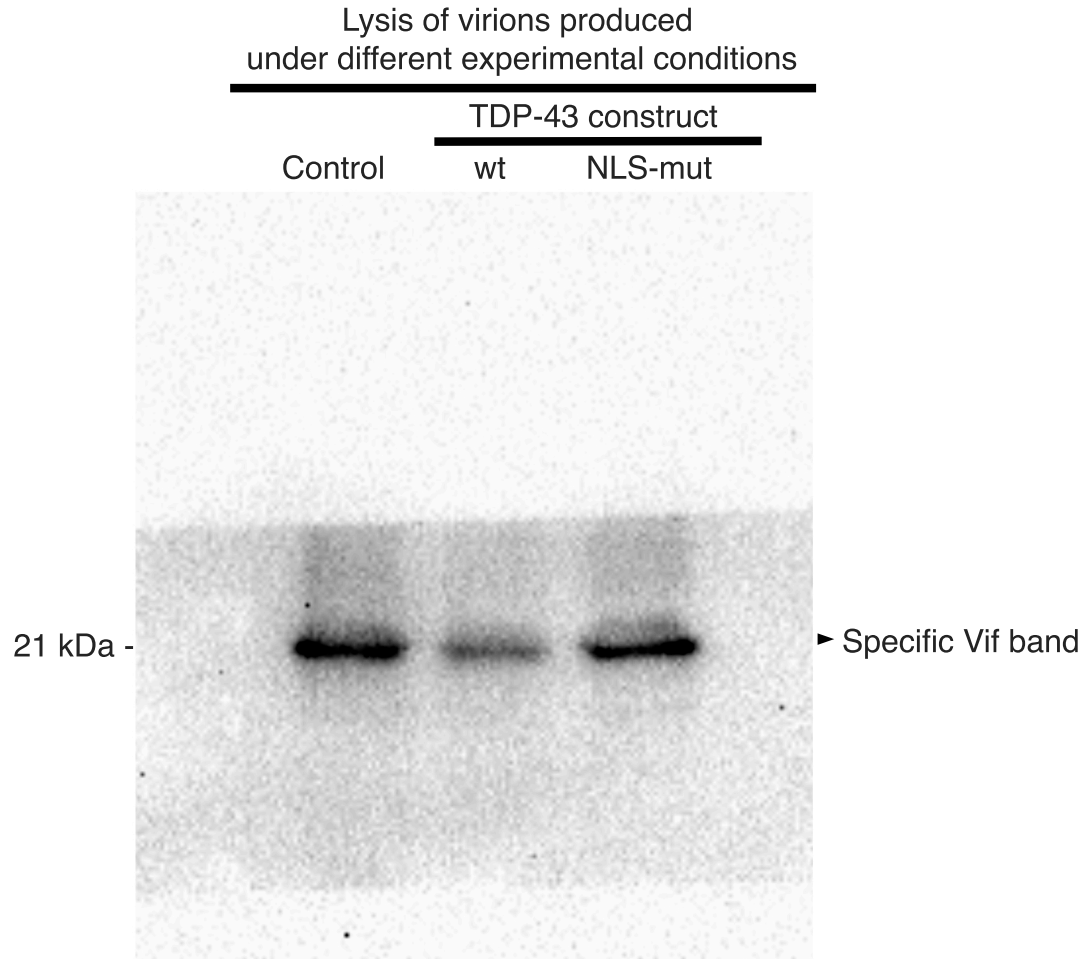

**Figure S3.** Replicate 2 Pr55<sup>Gag</sup> complete gel Western-blot associated with Figure 3B  
Cabrera-Rodríguez, R., *et al.*

Lysis of virions produced  
under different experimental conditions

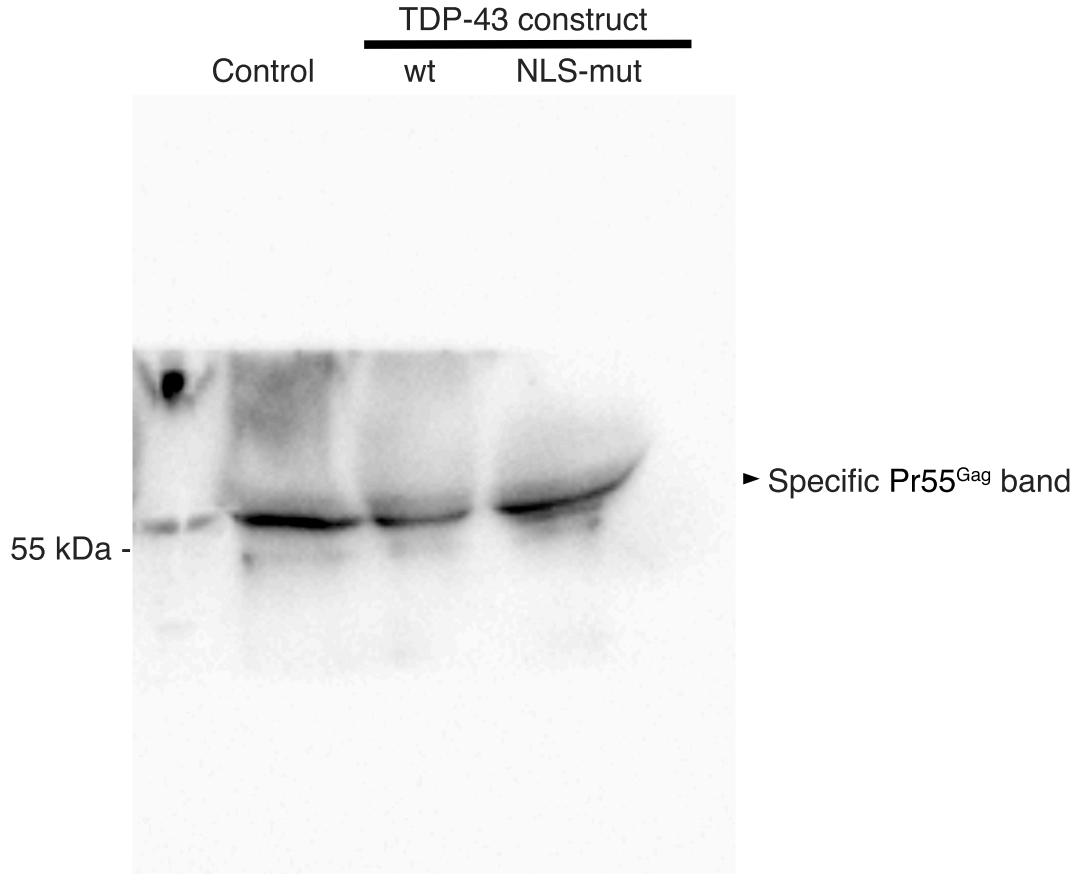

**Figure S3.** Replicate 2 p24 complete gel

Western-blot associated with Figure 3B  
Cabrera-Rodríguez, R., *et al.*

Lysis of virions produced  
under different experimental conditions

| Control | TDP-43 construct |         |
|---------|------------------|---------|
|         | wt               | NLS-mut |

24 kDa -

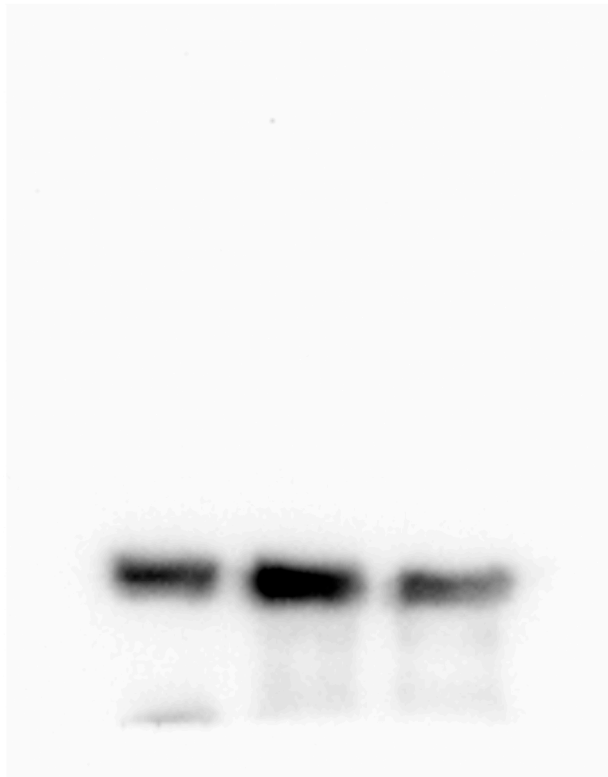

► Specific p24 band

**Figure S3.** Replicate 2 Vif complete gel Western-blot associated with Figure 3B  
Cabrera-Rodríguez, R., *et al.*

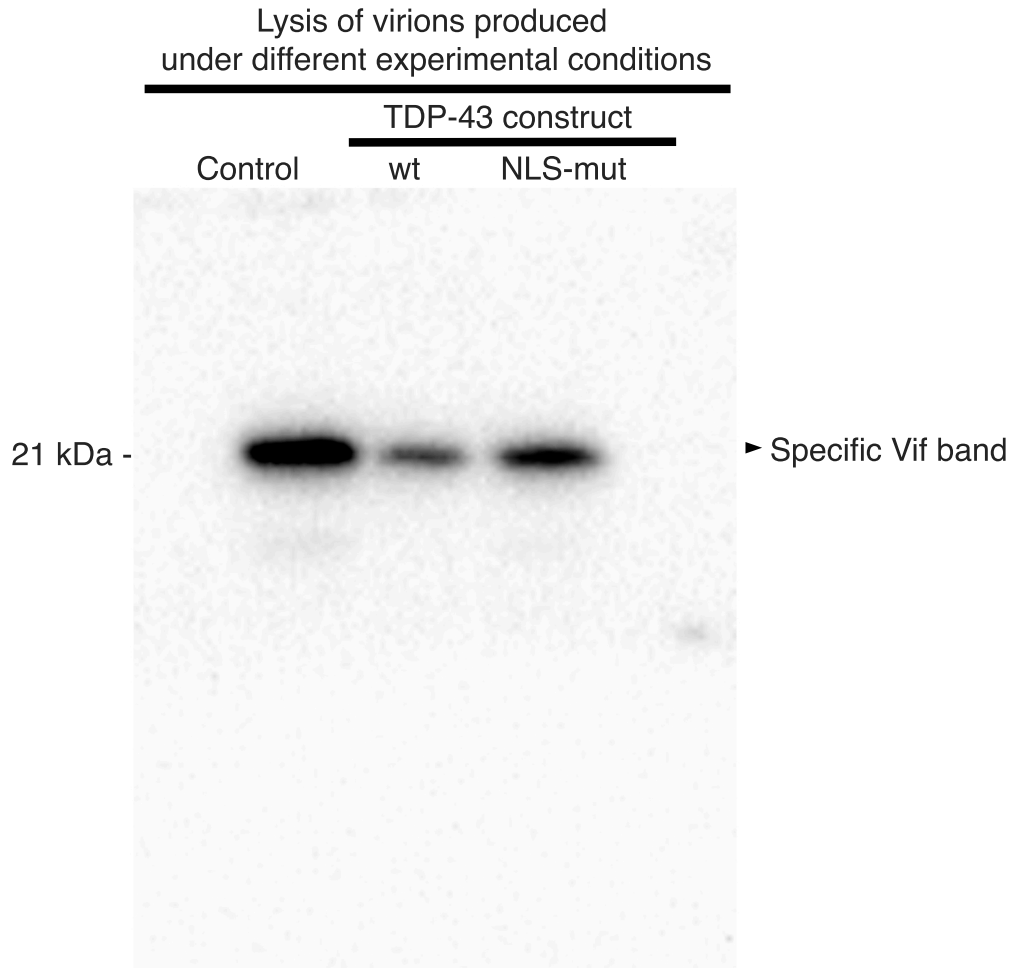

**Figure S3.** Replicate 3 Pr55<sup>Gag</sup> complete gel Western-blot associated with Figure 3B  
Cabrera-Rodríguez, R., *et al.*

Lysis of virions produced  
under different experimental conditions

| Control | TDP-43 construct |         |
|---------|------------------|---------|
|         | wt               | NLS-mut |

55 kDa -

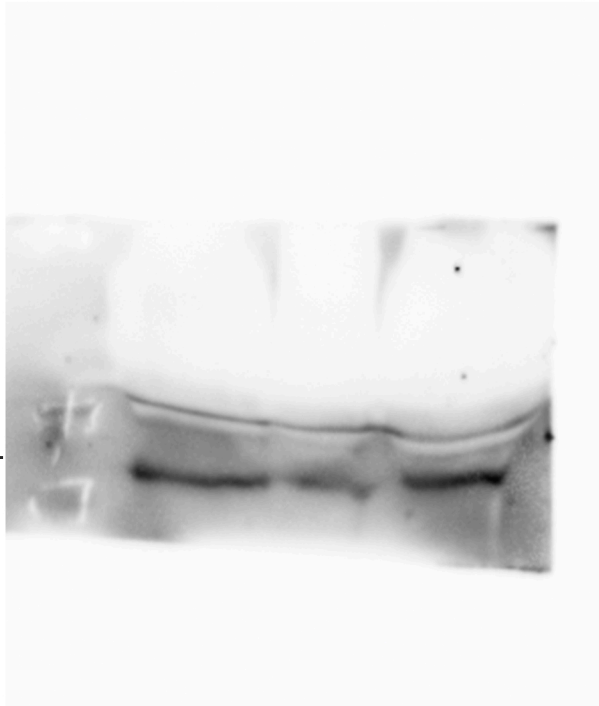

► Specific Pr55<sup>Gag</sup> band

**Figure S3.** Replicate 3 p24 complete gel

Western-blot associated with Figure 3B  
Cabrera-Rodríguez, R., *et al.*

Lysis of virions produced  
under different experimental conditions

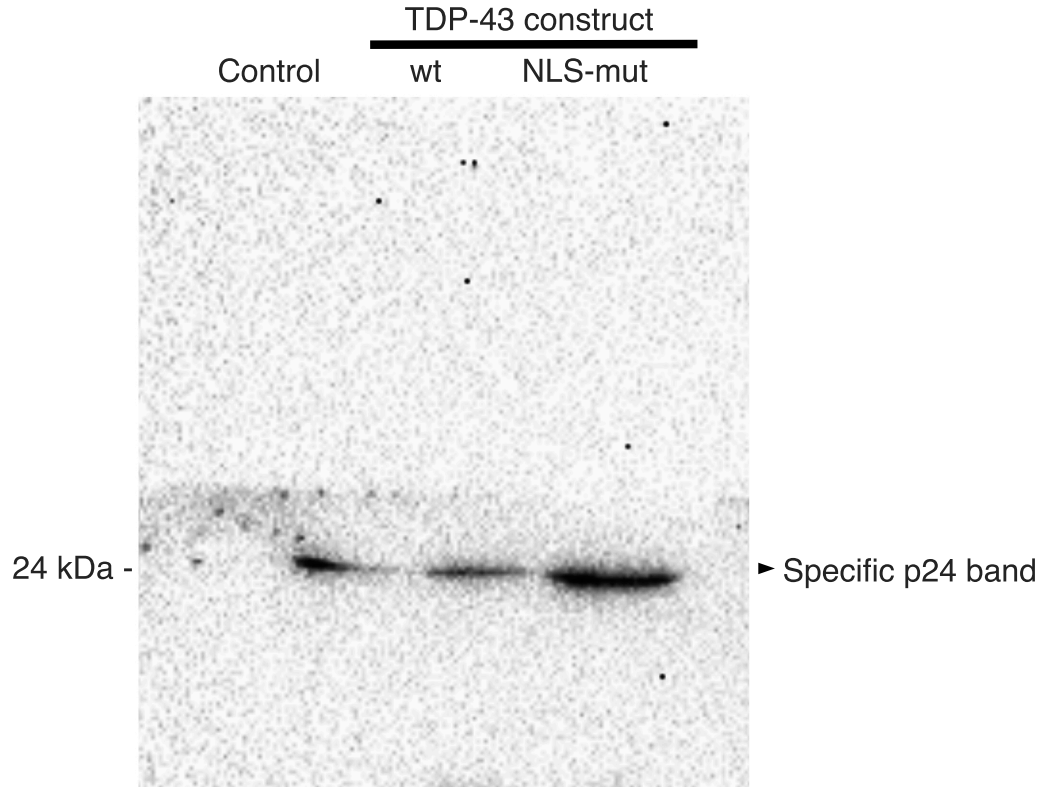



**Figure S3.** Replicate 3 Vif complete gel Western-blot associated with Figure 3B  
Cabrera-Rodríguez, R., *et al.*

Lysis of virions produced  
under different experimental conditions

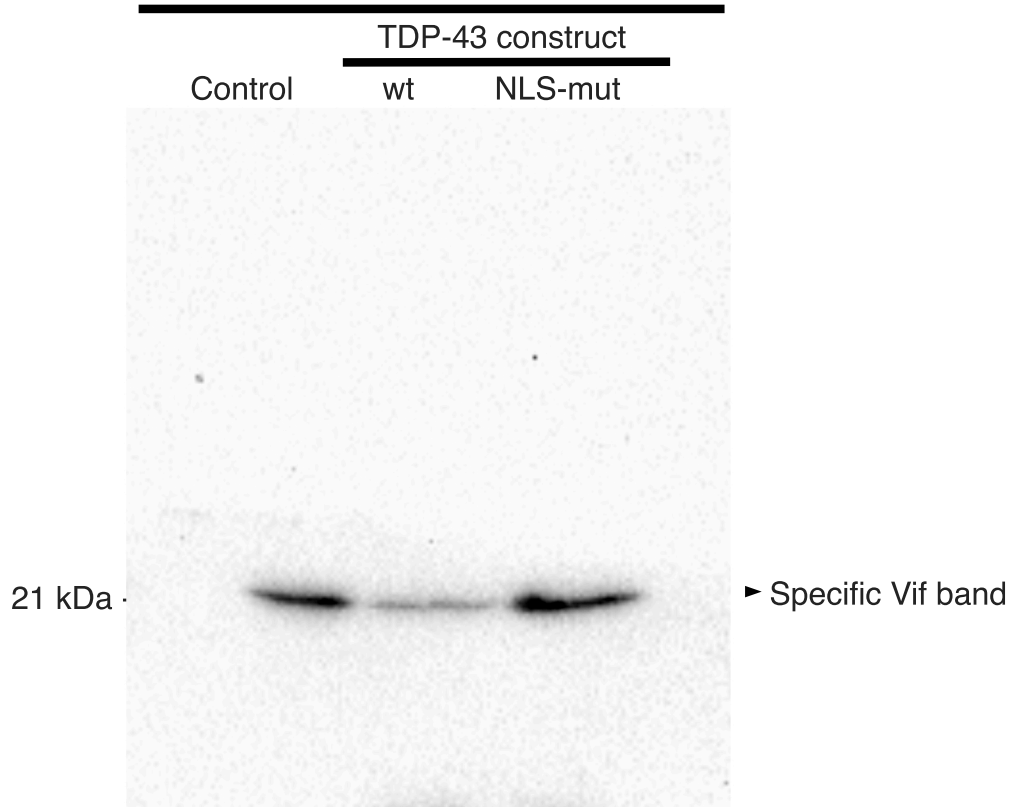

**A**

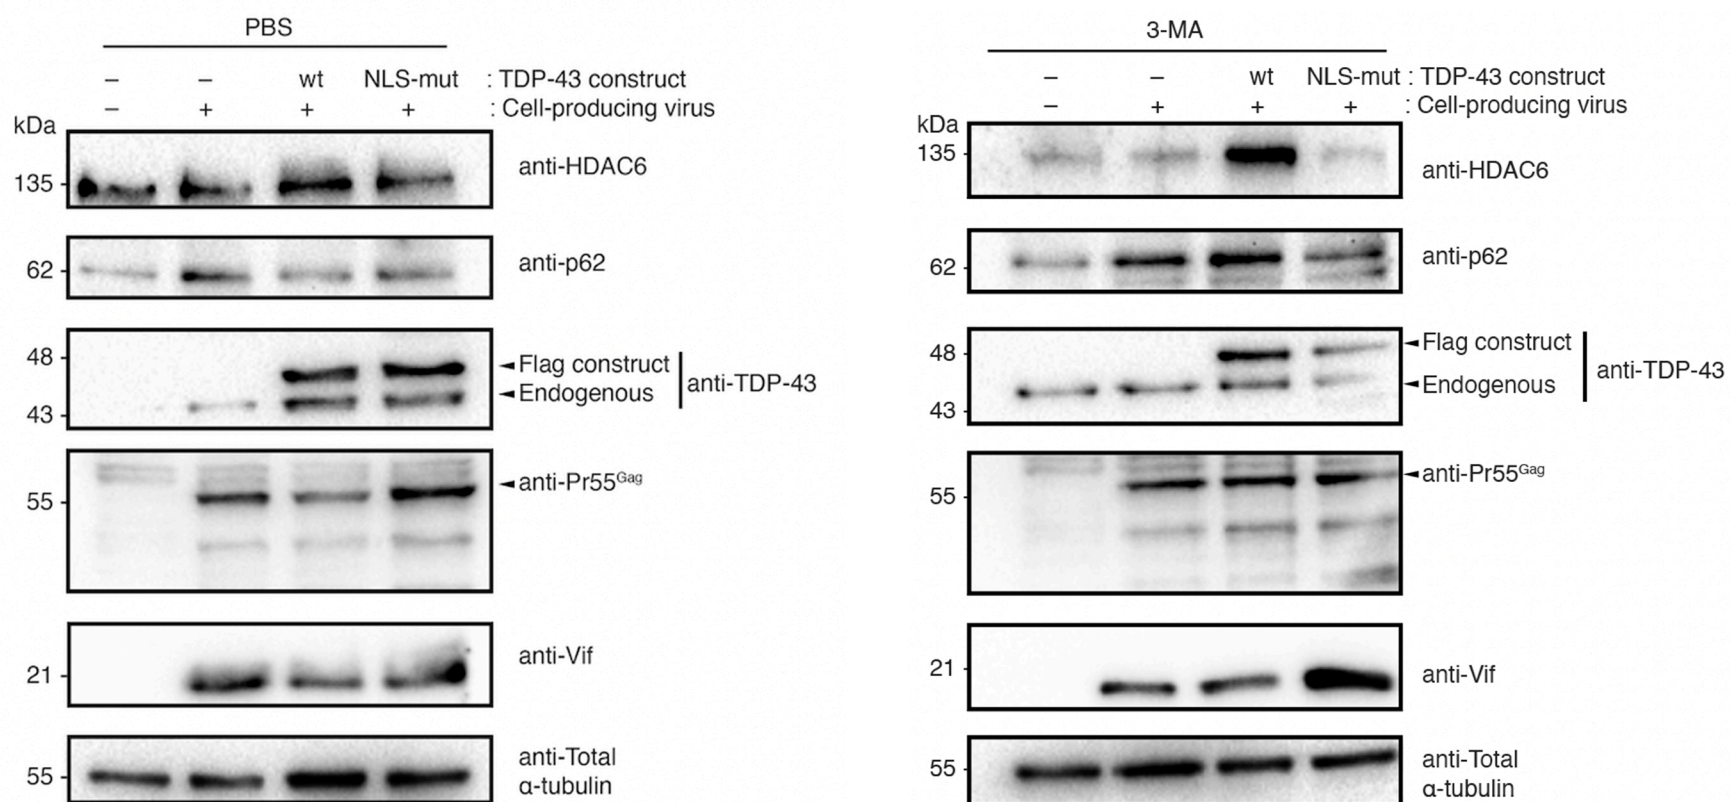

**A**

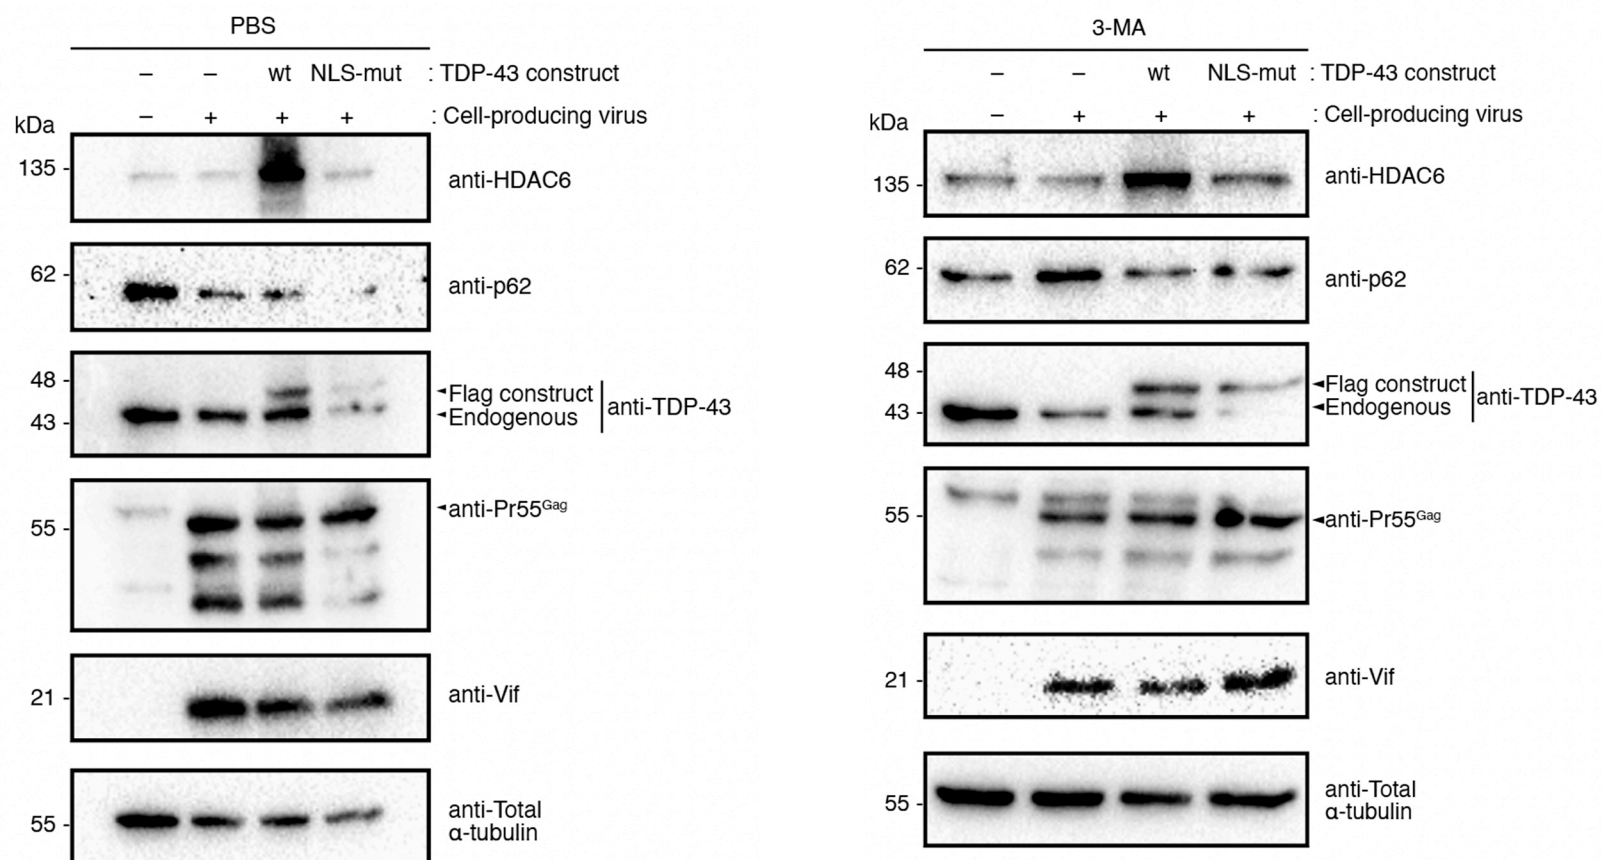

**A**

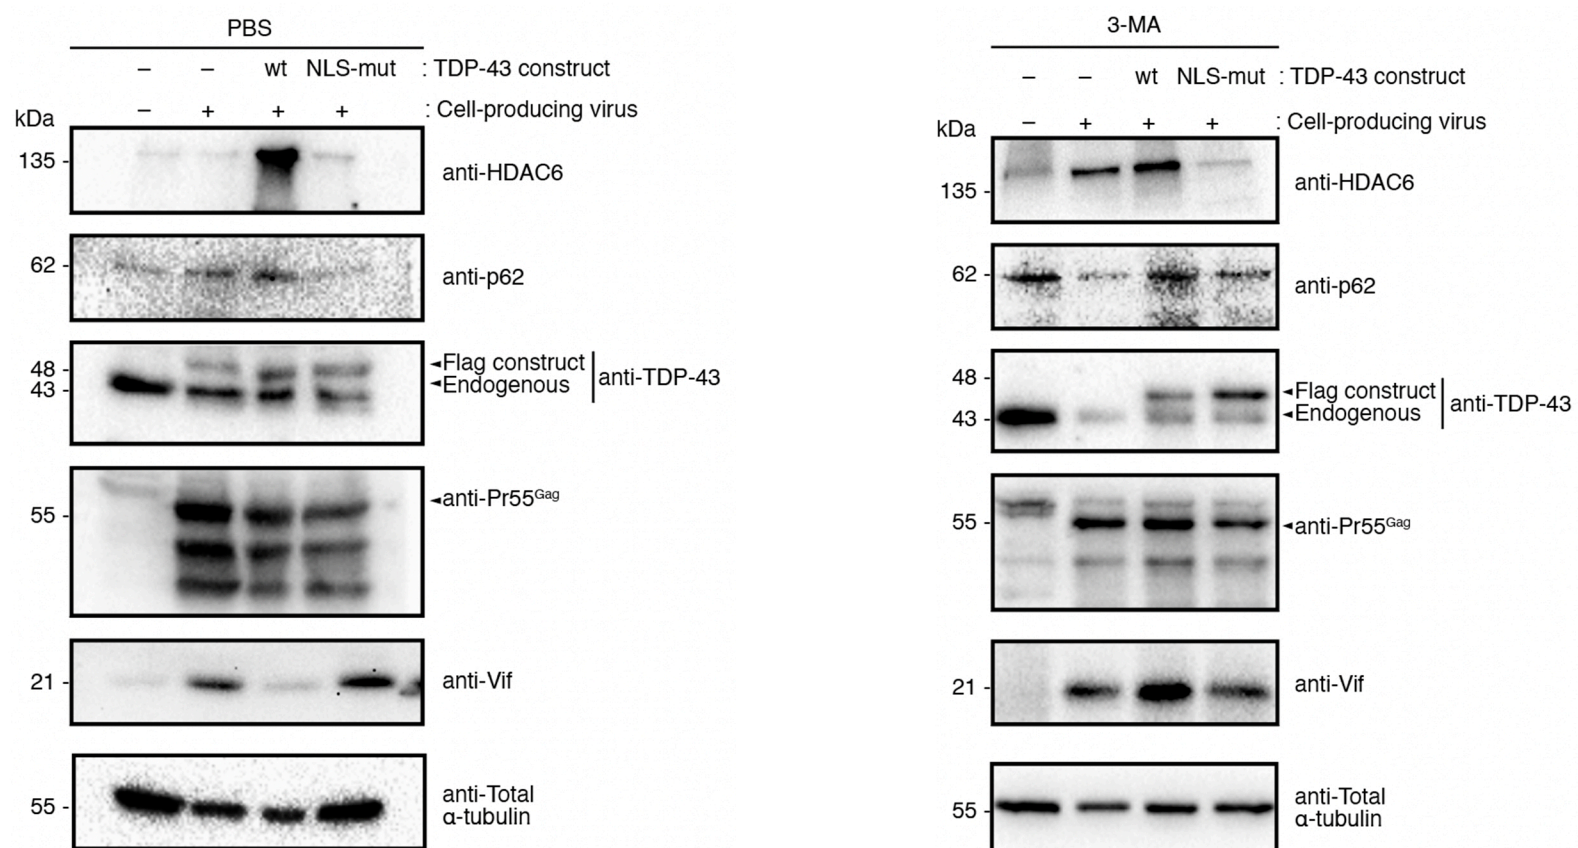

**Figure S4.** Replicate 1 HDAC6 complete gel Western-blot associated with Figure 4A  
Cabrera-Rodríguez, R., *et al.*

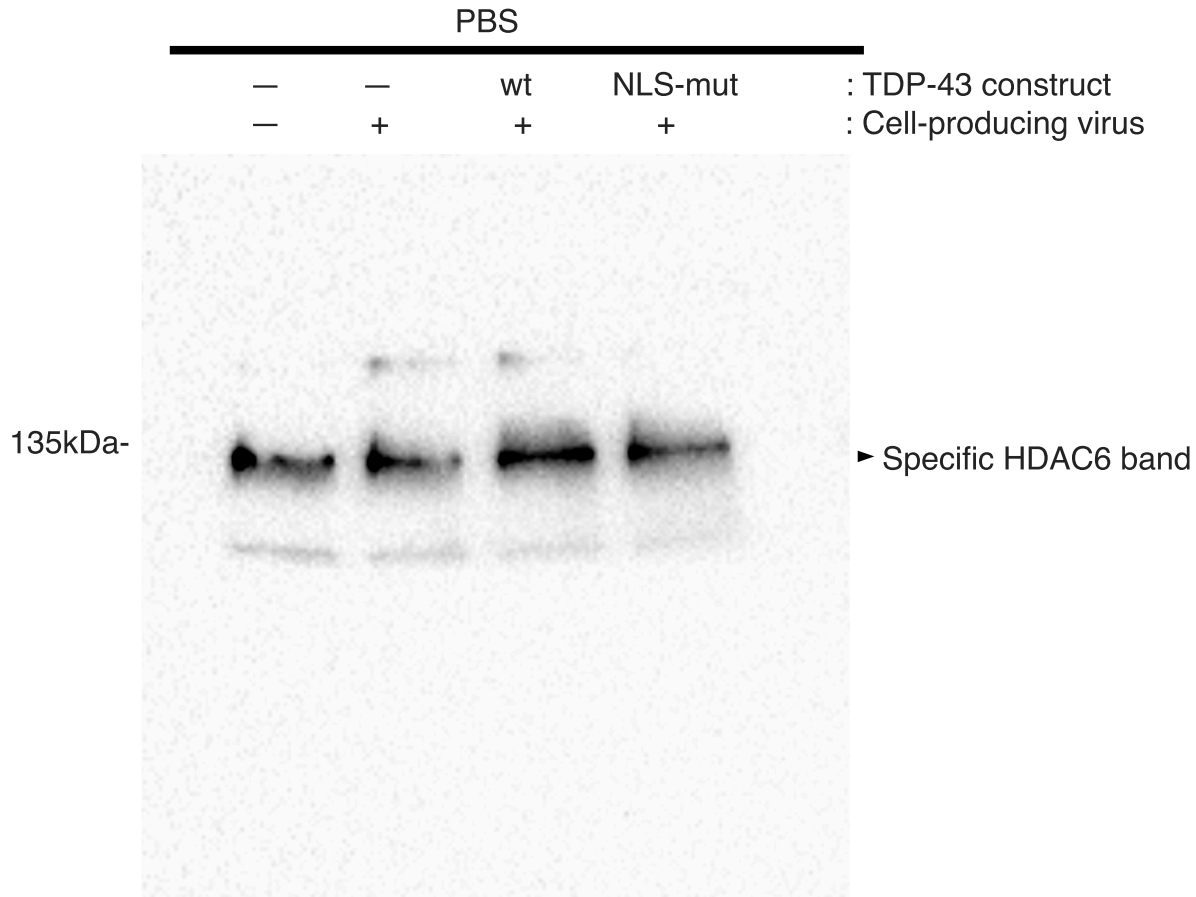



**Figure S4.** Replicate 1 p62 complete gel Western-blot associated with Figure 4A  
Cabrera-Rodríguez, R., *et al.*

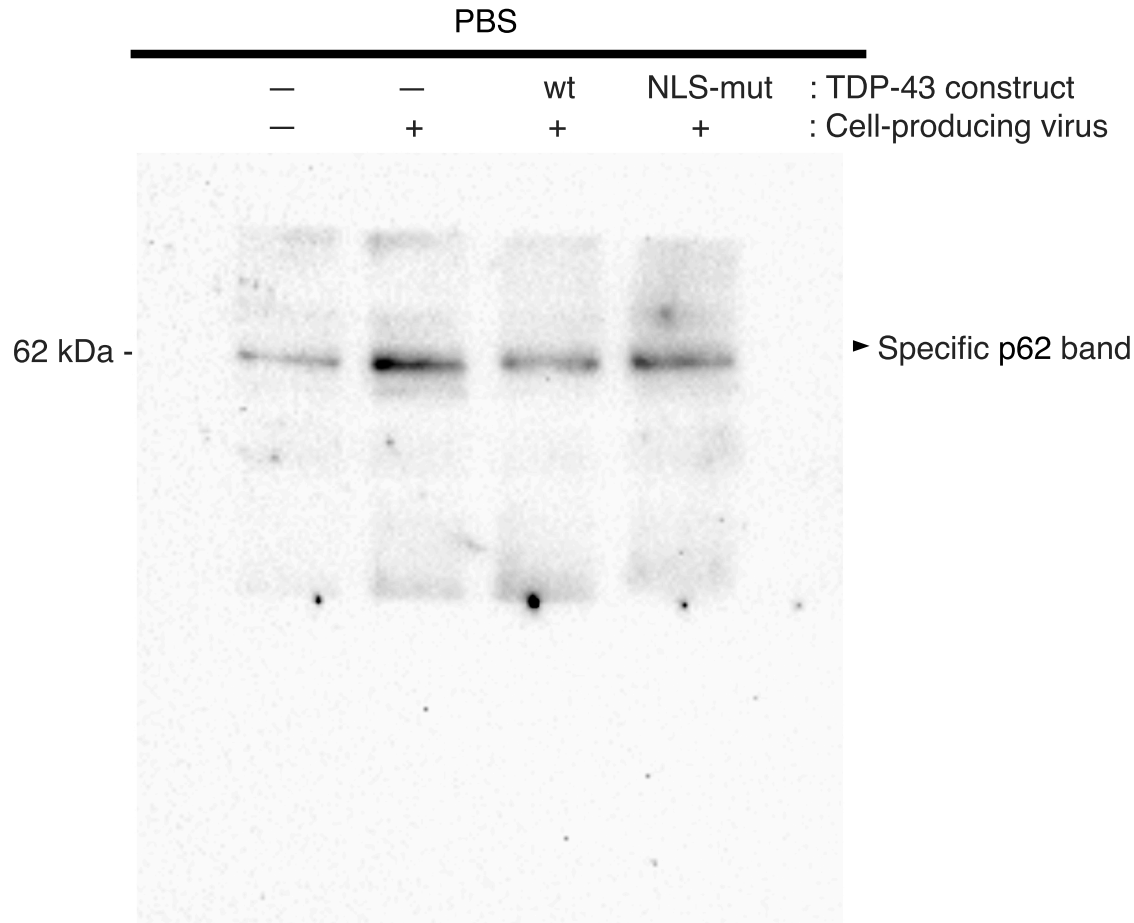

**Figure S4.** Replicate 1 TDP-43 complete gel Western-blot associated with Figure 4A  
Cabrera-Rodríguez, R., *et al.*

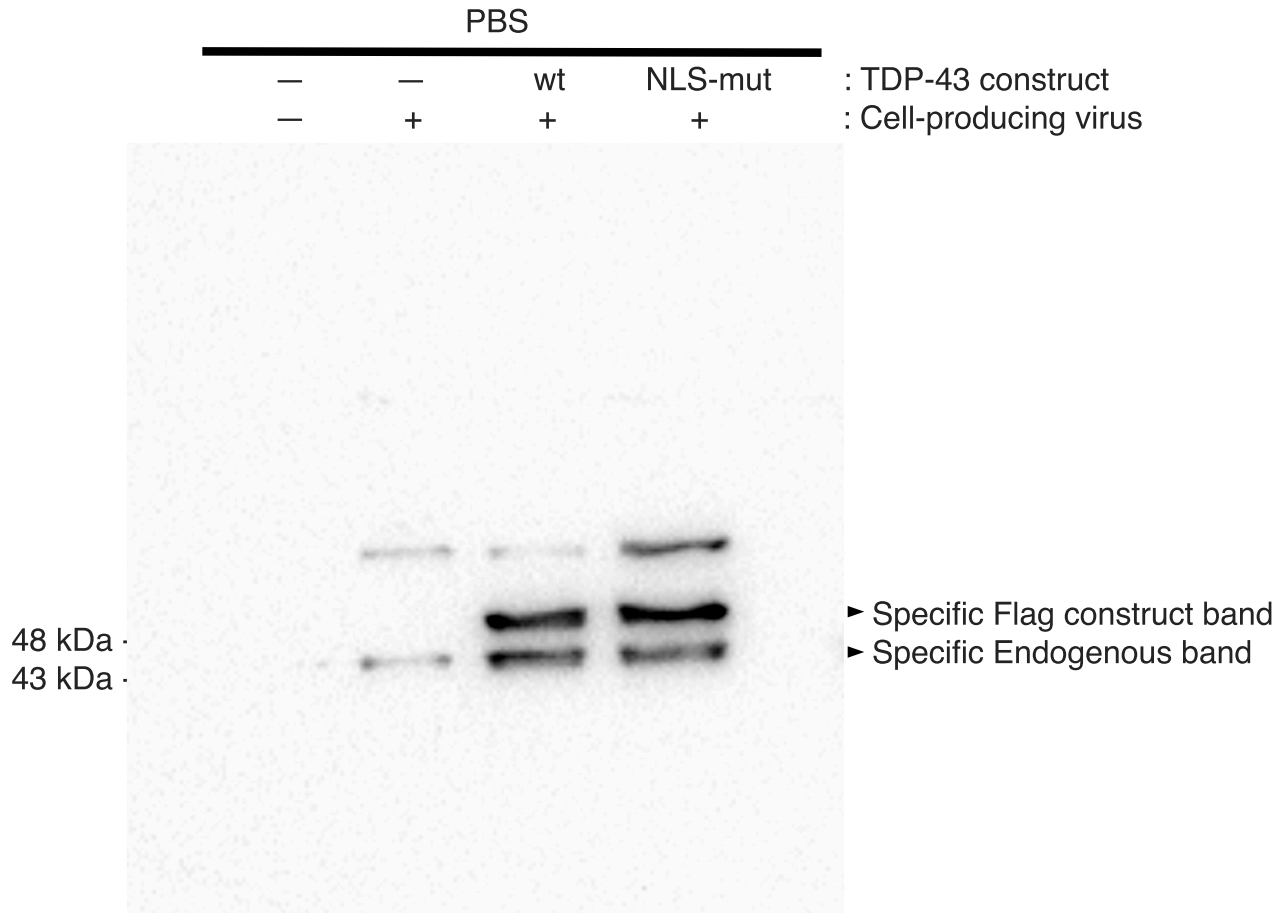

**Figure S4.** Replicate 1 Pr55<sup>Gag</sup> complete gel Western-blot associated with Figure 4A  
Cabrera-Rodríguez, R., *et al.*

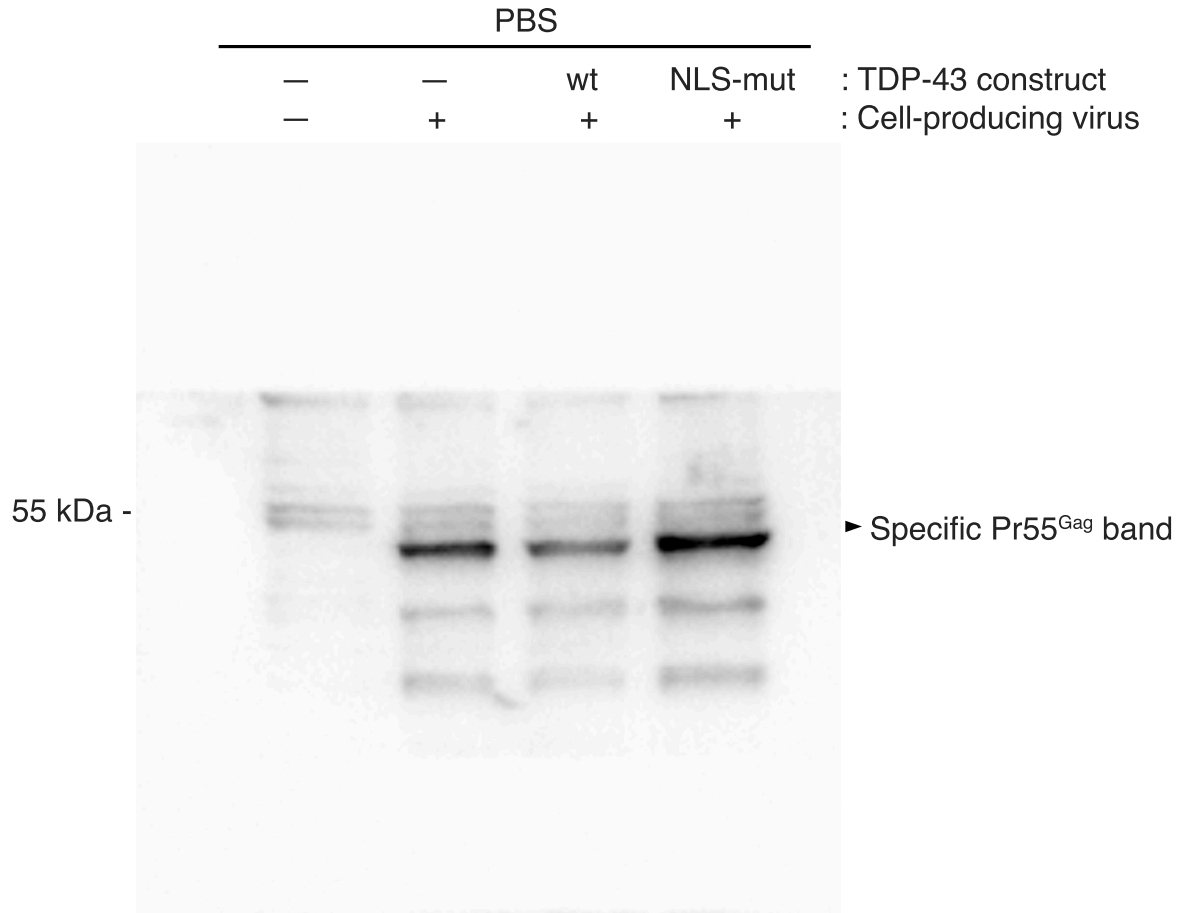

**Figure S4.** Replicate 1 Vif complete gel Western-blot associated with Figure 4A  
Cabrera-Rodríguez, R., *et al.*

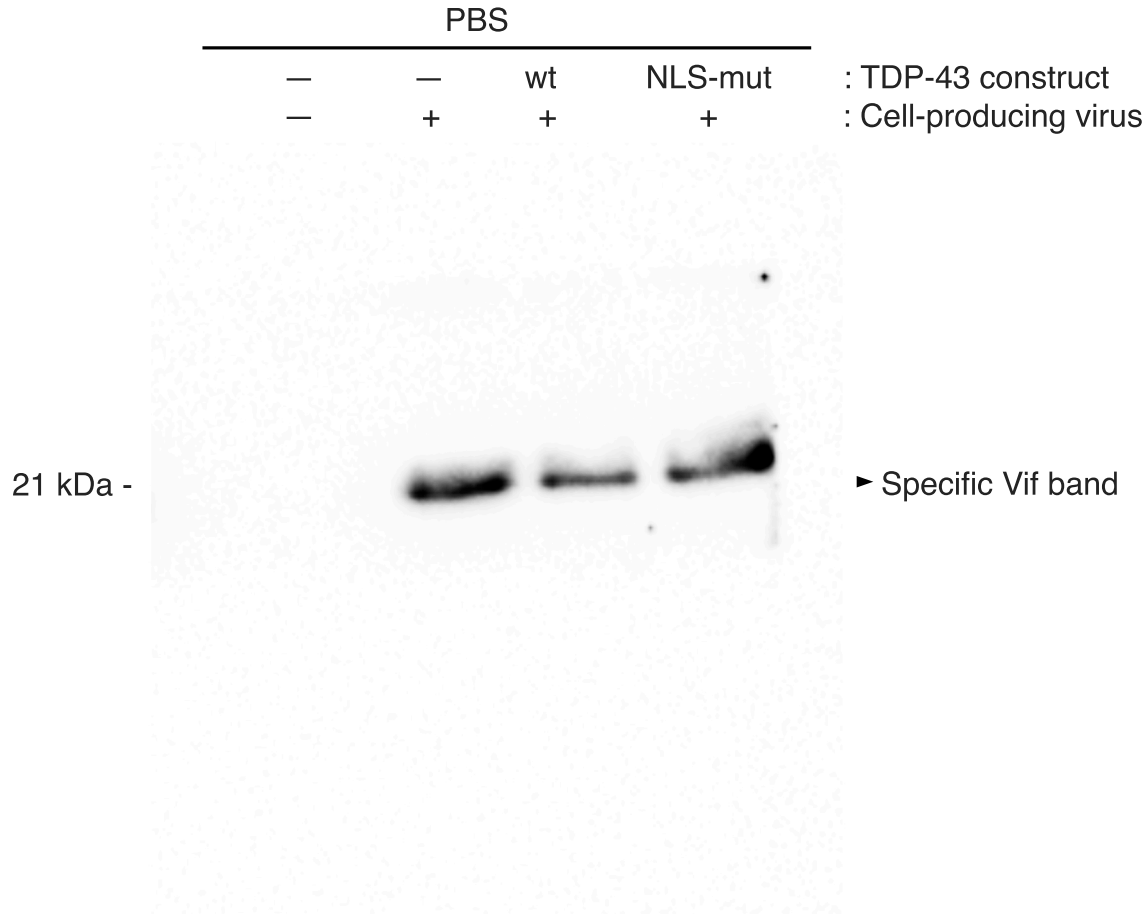

**Figure S4.** Replicate 1 Total  $\alpha$ -tubulin complete gel Western-blot associated with Figure 4A  
Cabrera-Rodríguez, R., *et al.*

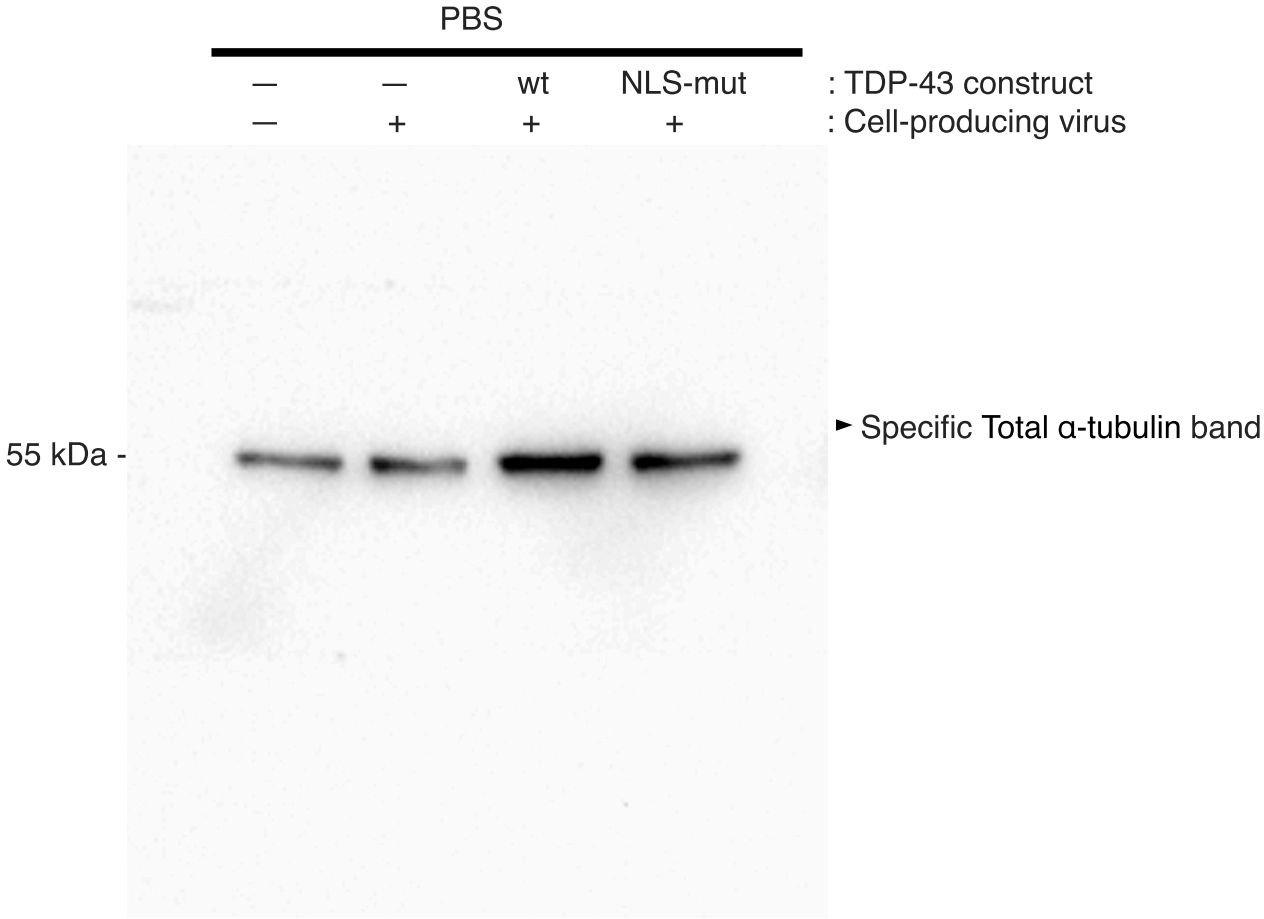



**Figure S4.** Replicate 1 HDAC6 complete gel Western-blot associated with Figure 4A  
Cabrera-Rodríguez, R., *et al.*

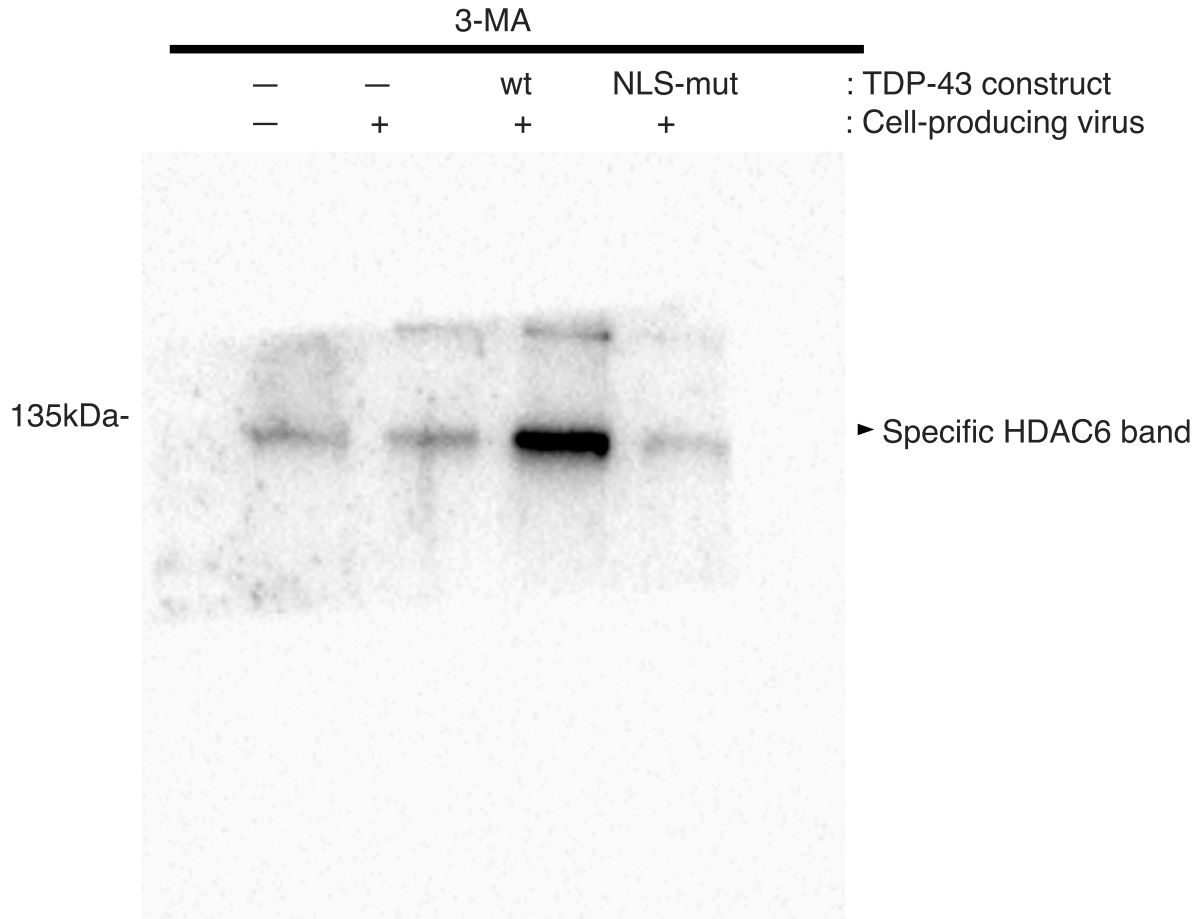

**Figure S4.** Replicate 1 p62 complete gel Western-blot associated with Figure 4A  
Cabrera-Rodríguez, R., *et al.*

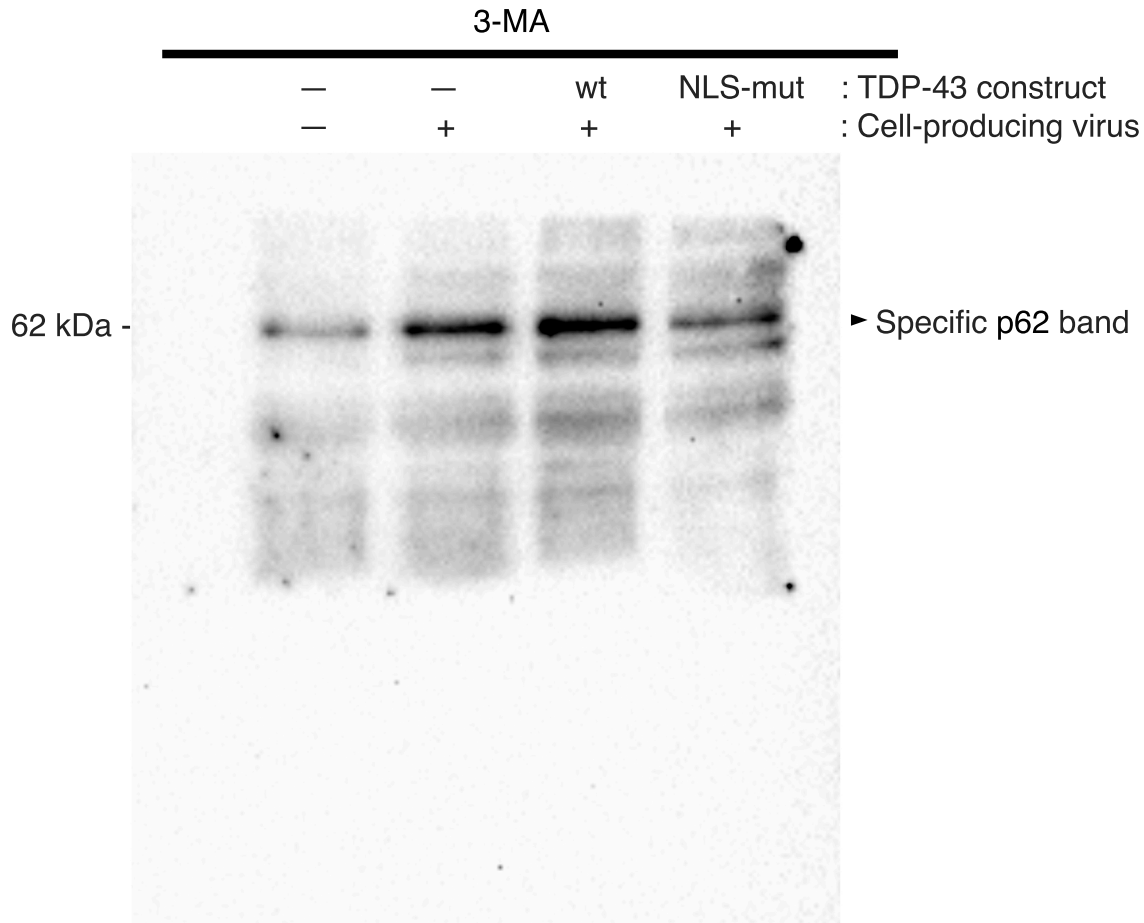

**Figure S4.** Replicate 1 TDP-43 complete gel Western-blot associated with Figure 4A  
Cabrera-Rodríguez, R., *et al.*

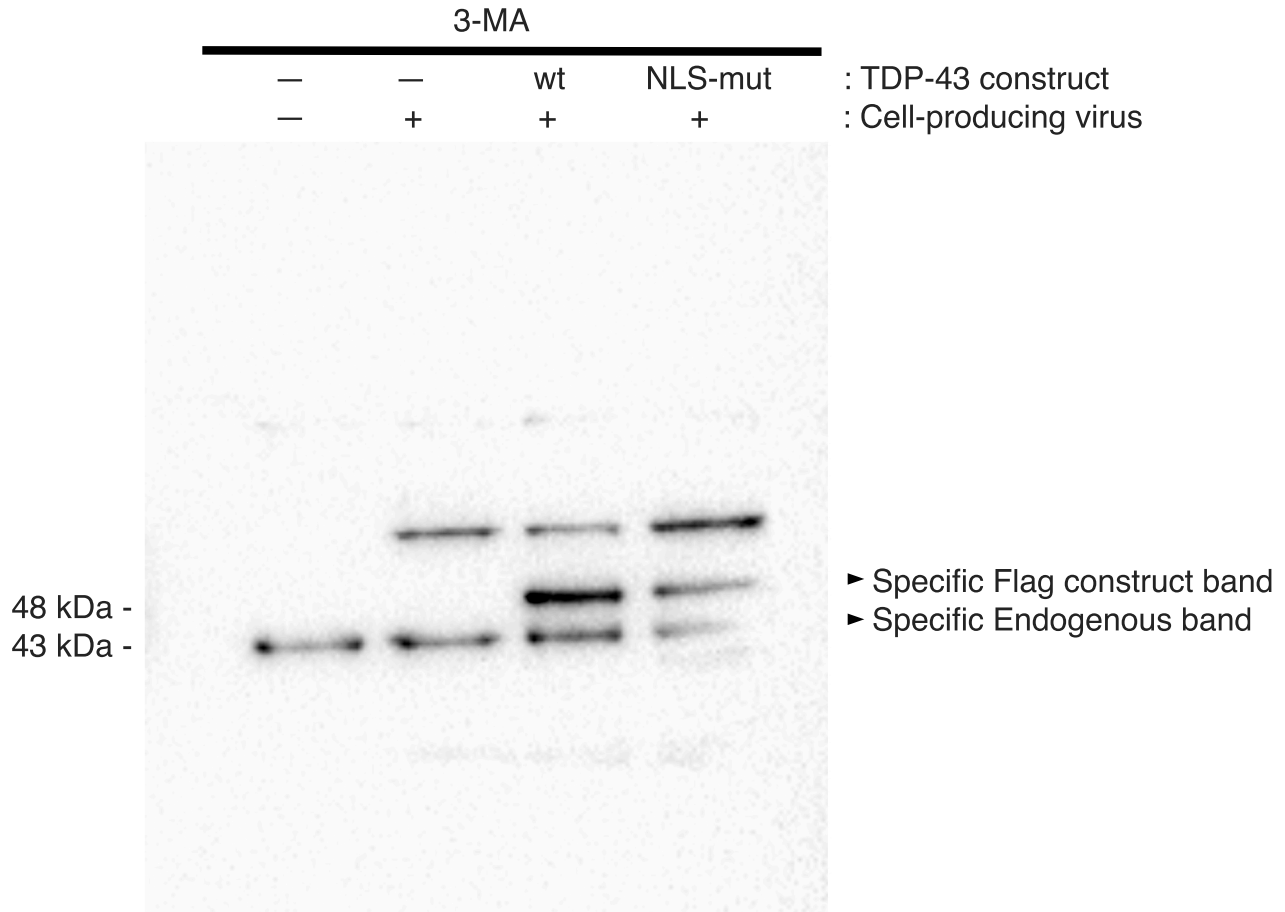

**Figure S4.** Replicate 1 Pr55<sup>Gag</sup> complete gel Western-blot associated with Figure 4A  
Cabrera-Rodríguez, R., *et al.*

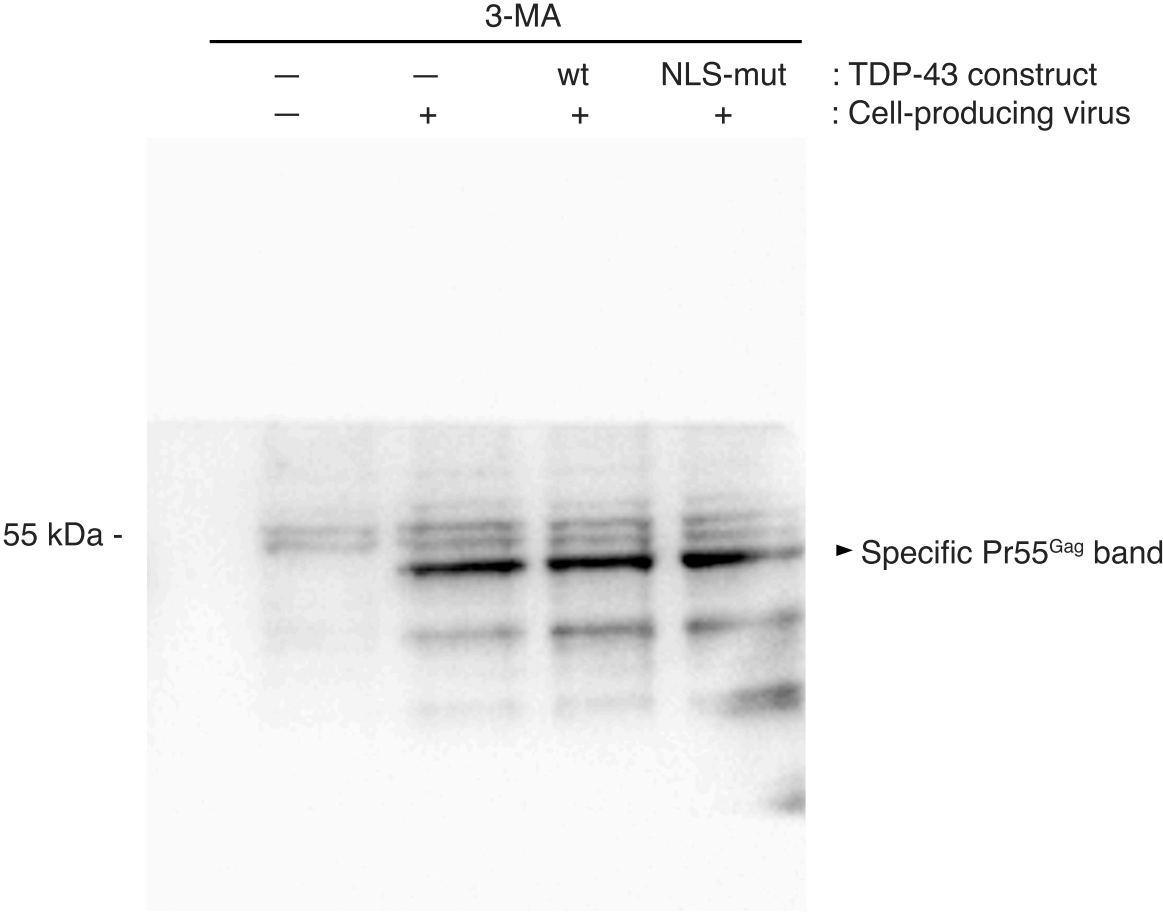

**Figure S4.** Replicate 1 Vif complete gel Western-blot associated with Figure 4A  
Cabrera-Rodríguez, R., *et al.*

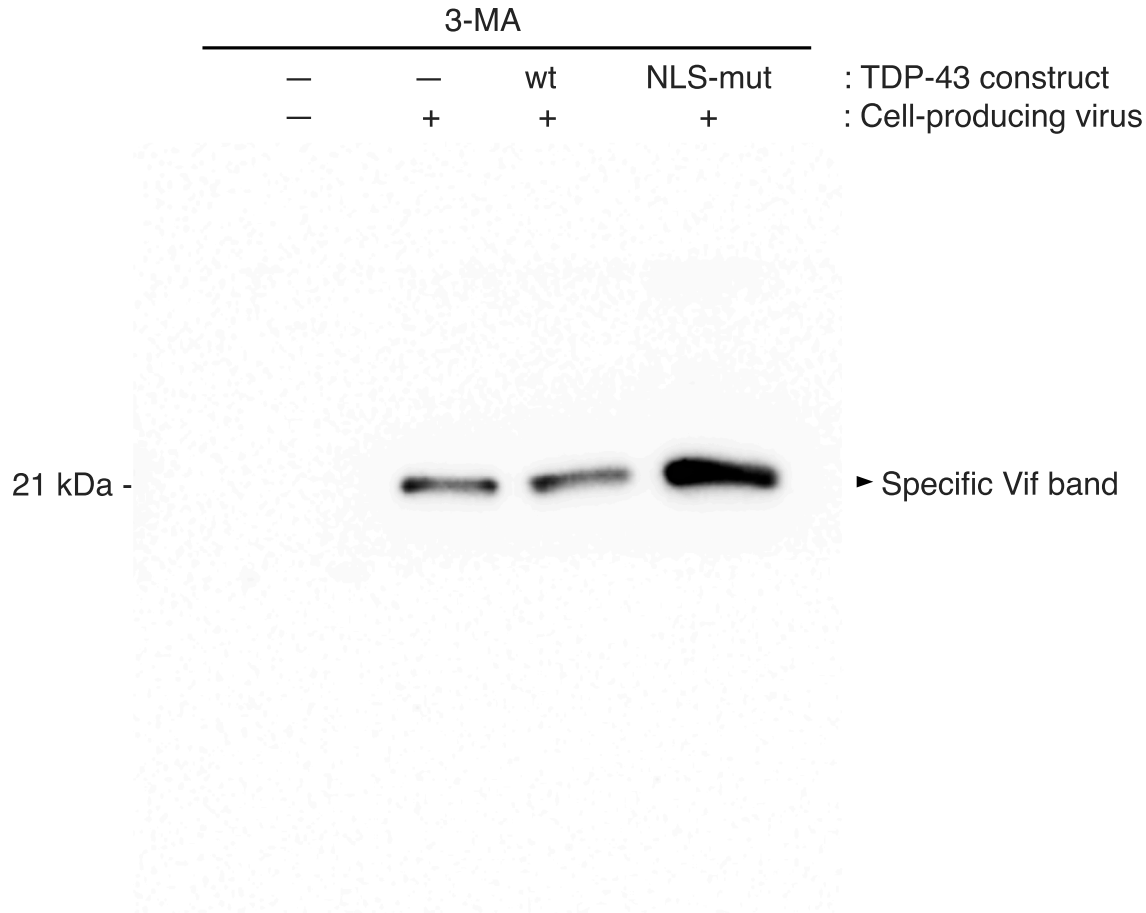

**Figure S4.** Replicate 1 Total  $\alpha$ -tubulin complete gel Western-blot associated with Figure 4A  
Cabrera-Rodríguez, R., *et al.*

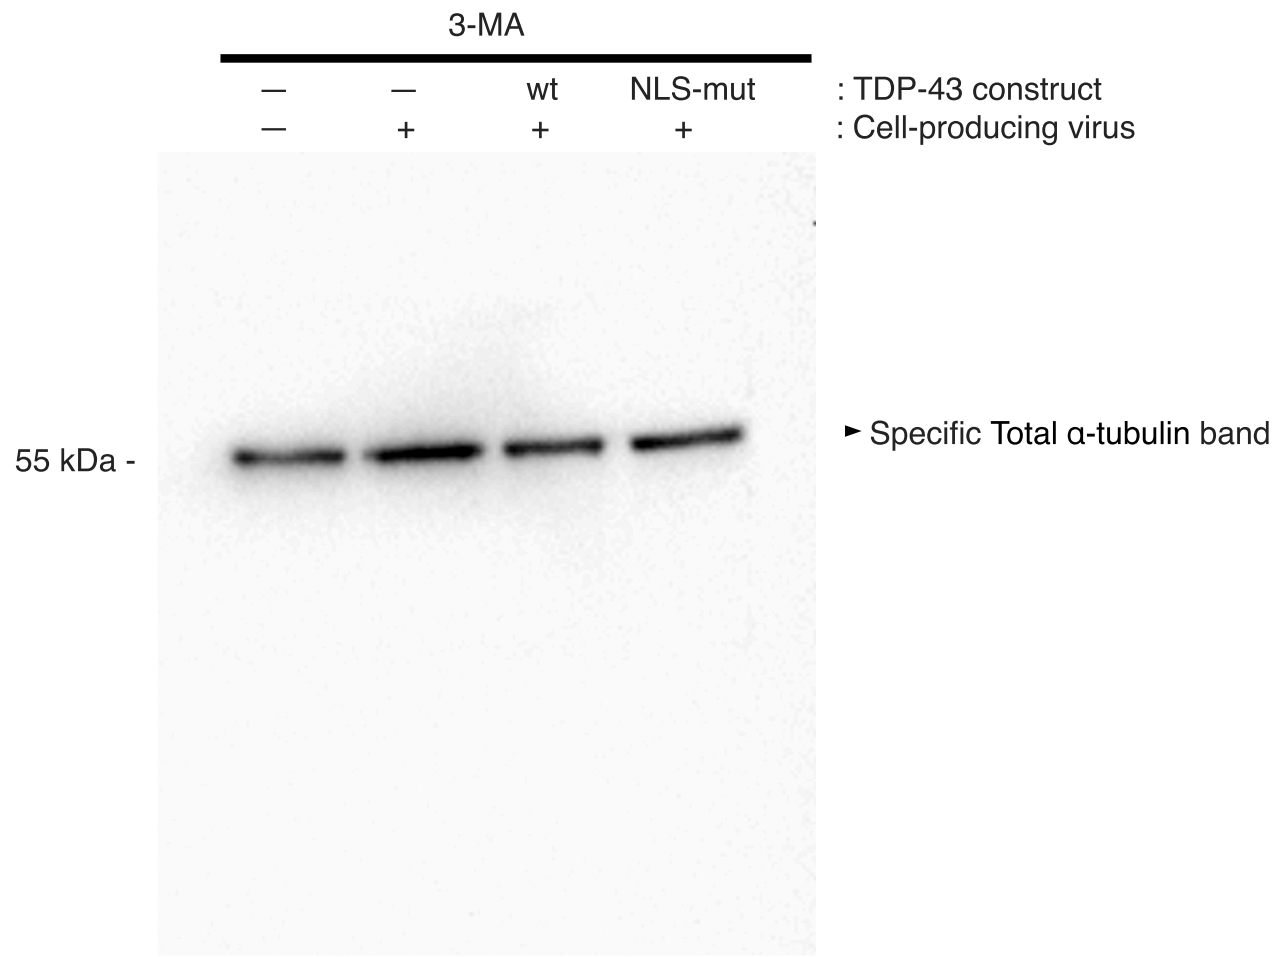

**Figure S4.** Replicate 2 HDAC6 complete gel Western-blot associated with Figure 4A  
Cabrera-Rodríguez, R., *et al.*

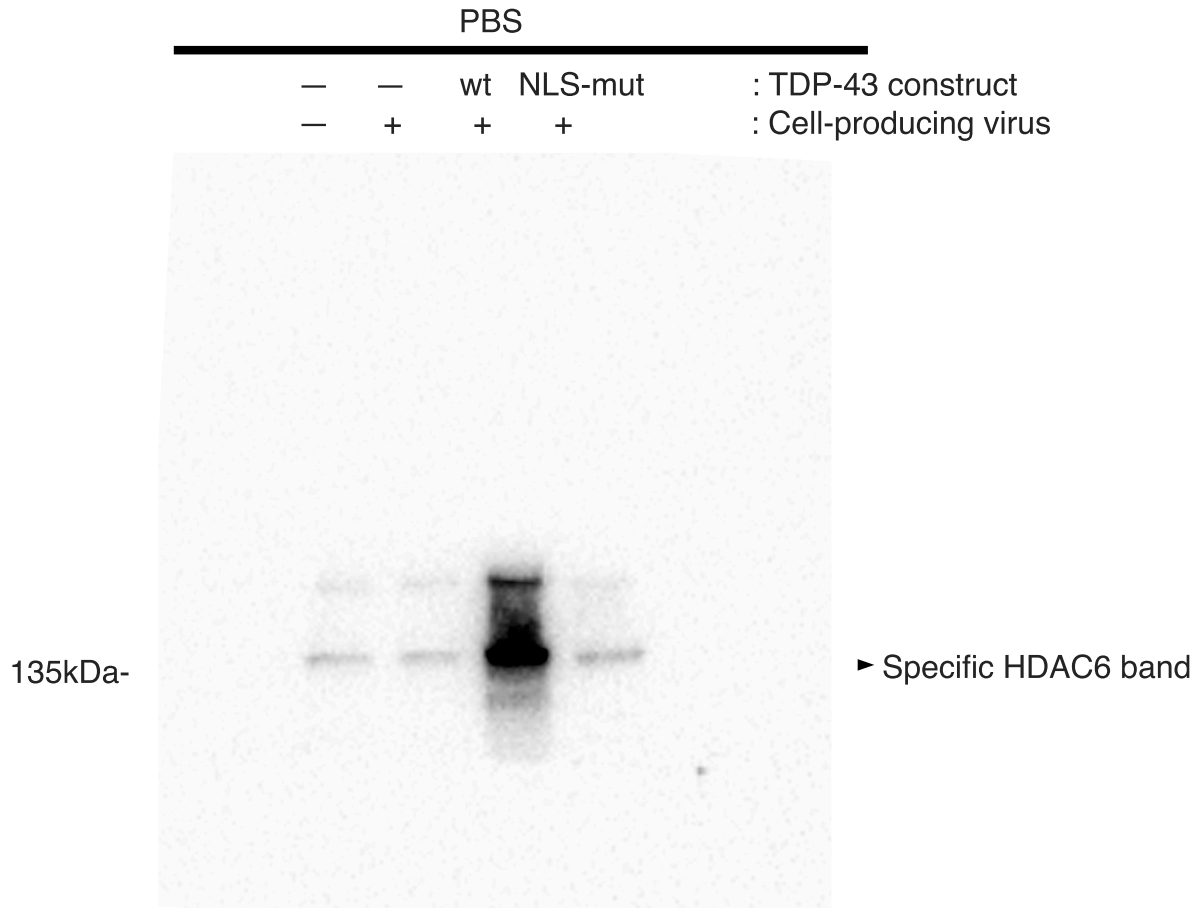

**Figure S4.** Replicate 2 p62 complete gel Western-blot associated with Figure 4A  
Cabrera-Rodríguez, R., *et al.*

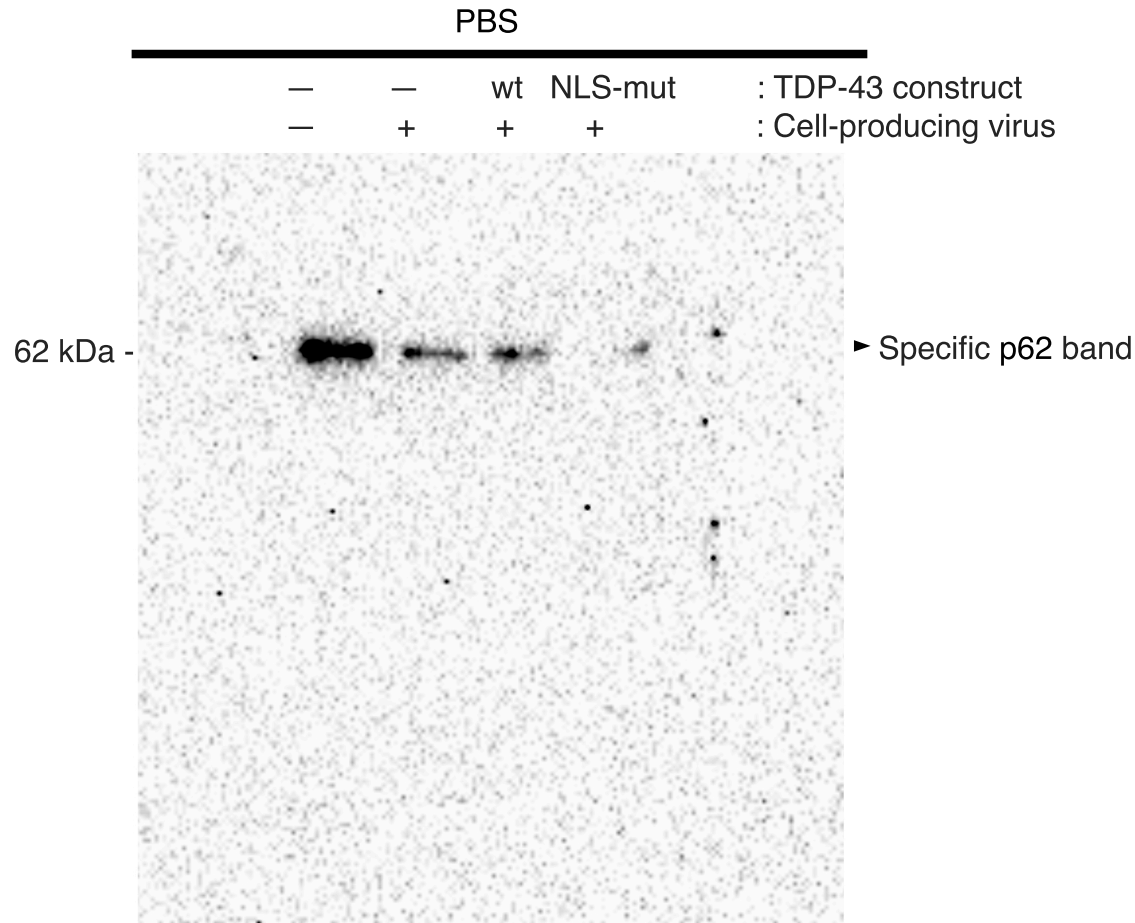



**Figure S4.** Replicate 2 TDP-43 complete gel Western-blot associated with Figure 4A  
Cabrera-Rodríguez, R., *et al.*

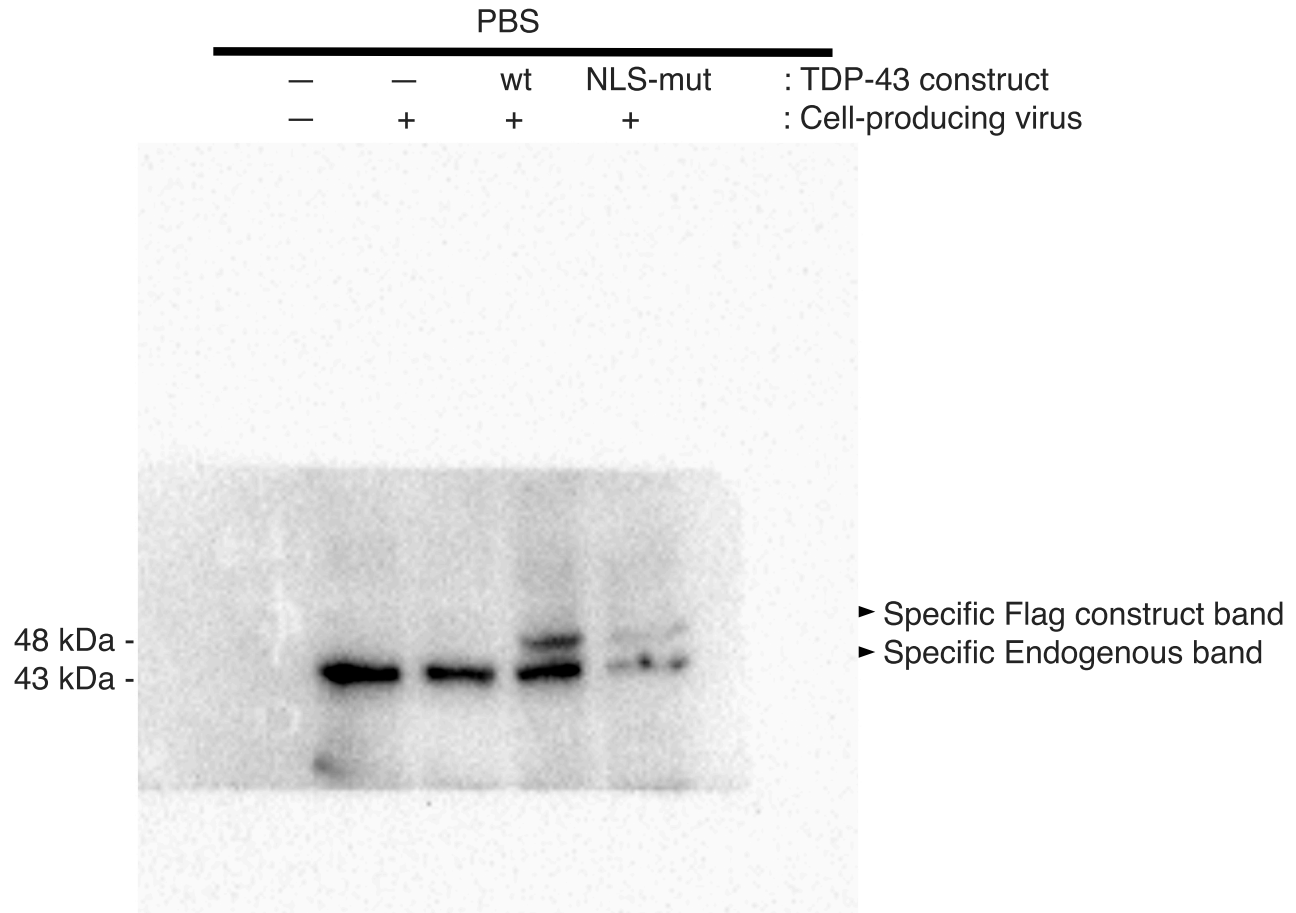

**Figure S4.** Replicate 2 Pr55<sup>Gag</sup> complete gel Western-blot associated with Figure 4A  
Cabrera-Rodríguez, R., *et al.*

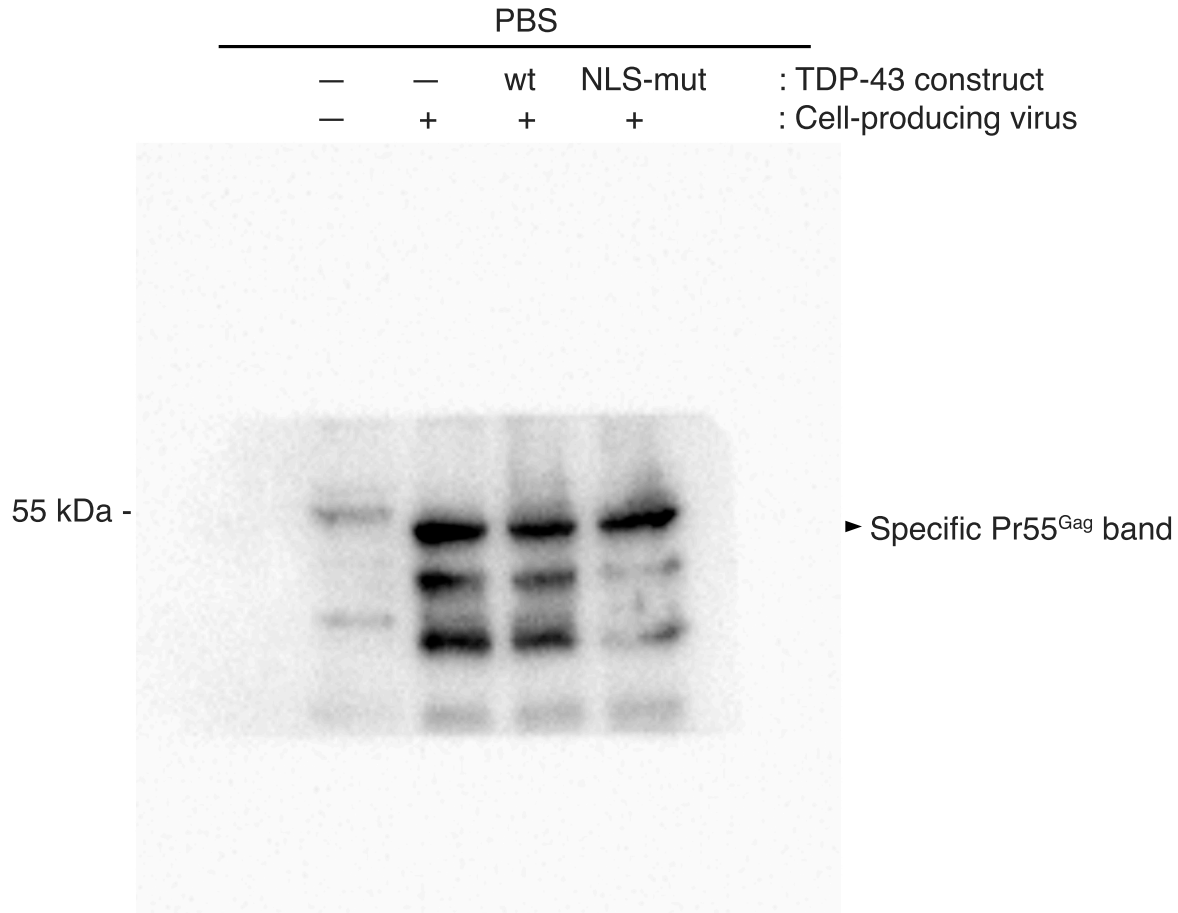

**Figure S4.** Replicate 2 Vif complete gel Western-blot associated with Figure 4A  
Cabrera-Rodríguez, R., *et al.*

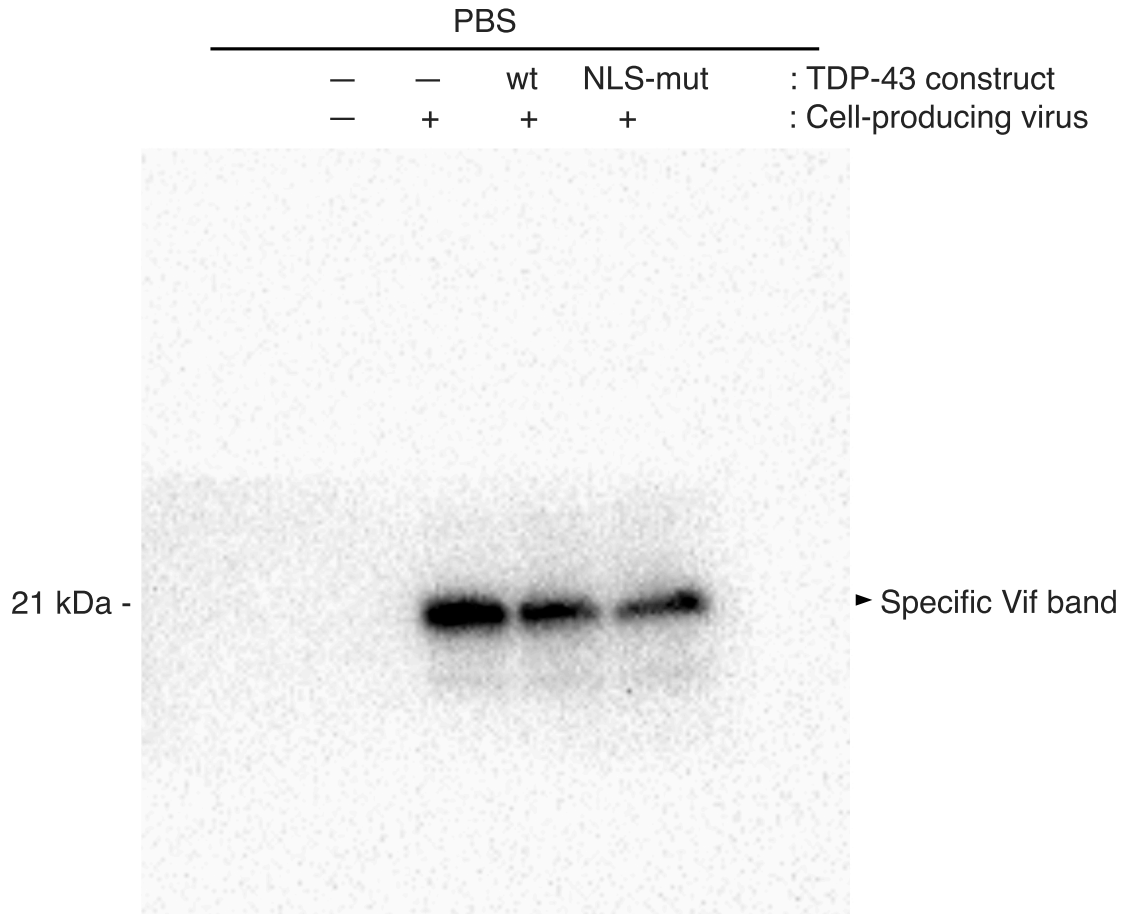

**Figure S4.** Replicate 2 Total  $\alpha$ -tubulin complete gel Western-blot associated with Figure 4A  
Cabrera-Rodríguez, R., *et al.*

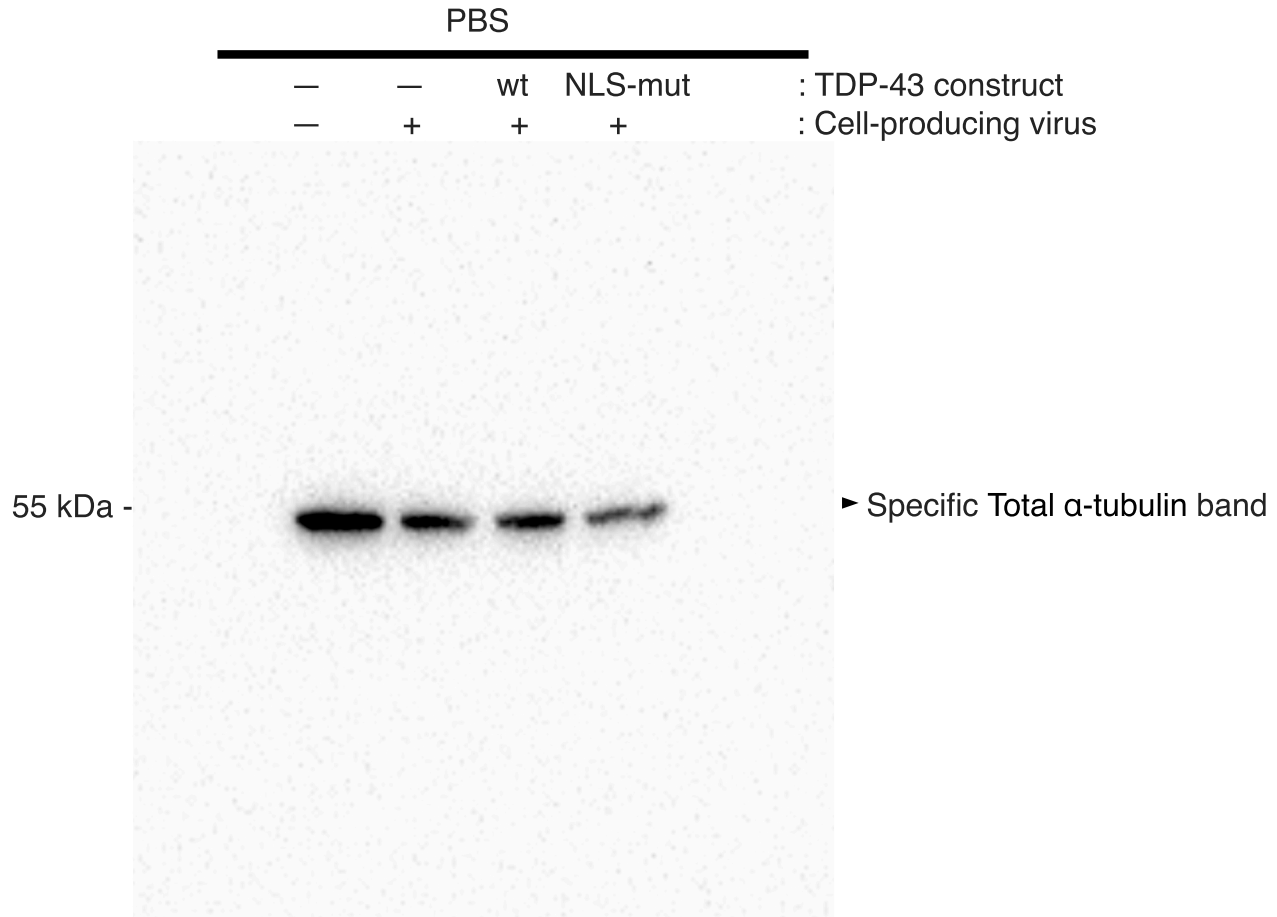

**Figure S4.** Replicate 2 HDAC6 complete gel Western-blot associated with Figure 4A  
Cabrera-Rodríguez, R., *et al.*

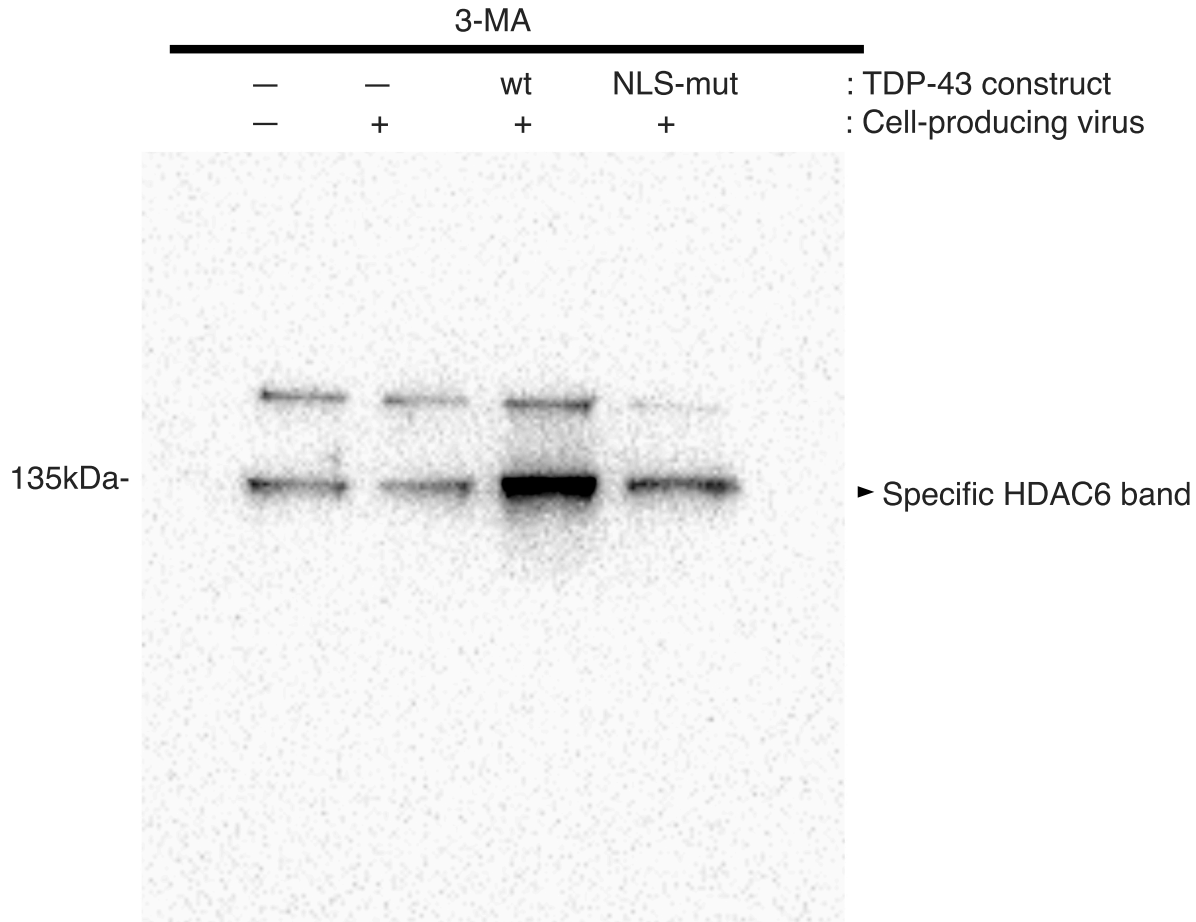

**Figure S4.** Replicate 2 p62 complete gel Western-blot associated with Figure 4A  
Cabrera-Rodríguez, R., *et al.*

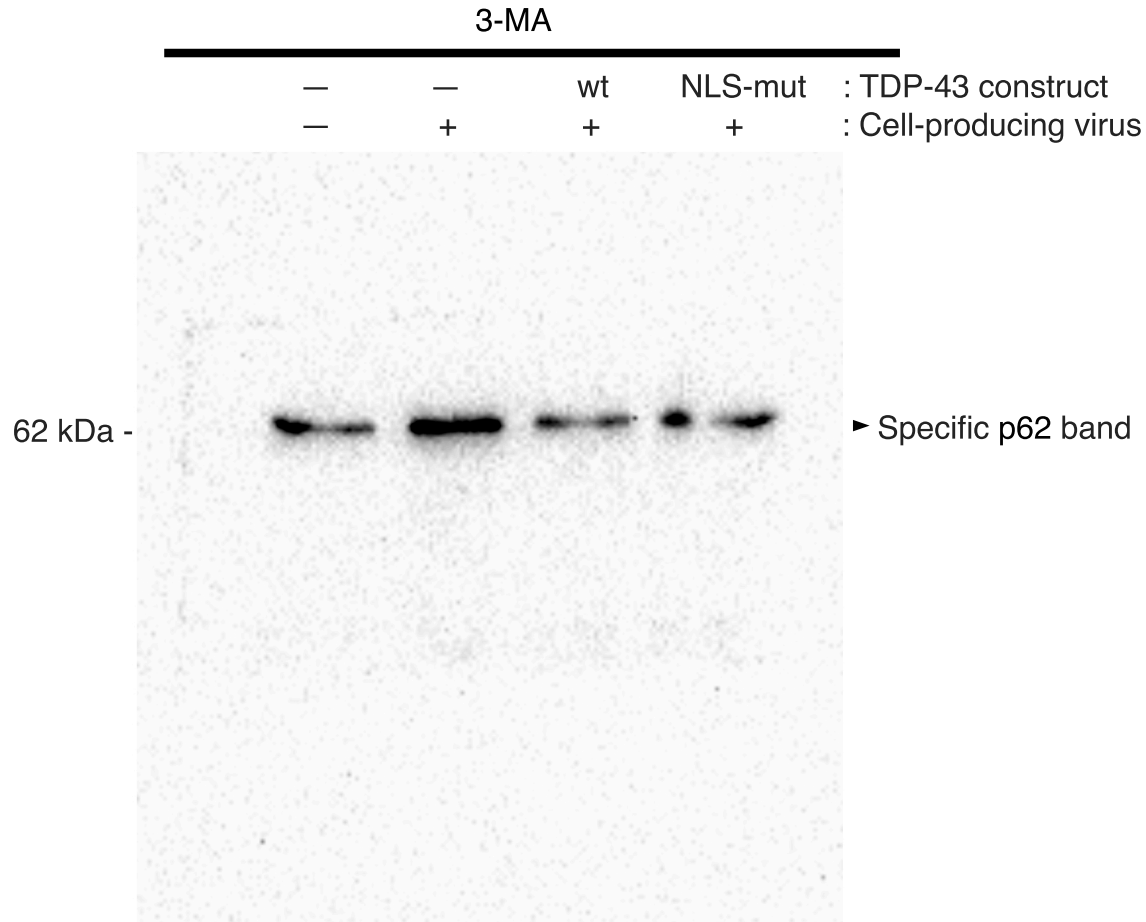

**Figure S4.** Replicate 2 TDP-43 complete gel Western-blot associated with Figure 4A  
Cabrera-Rodríguez, R., *et al.*

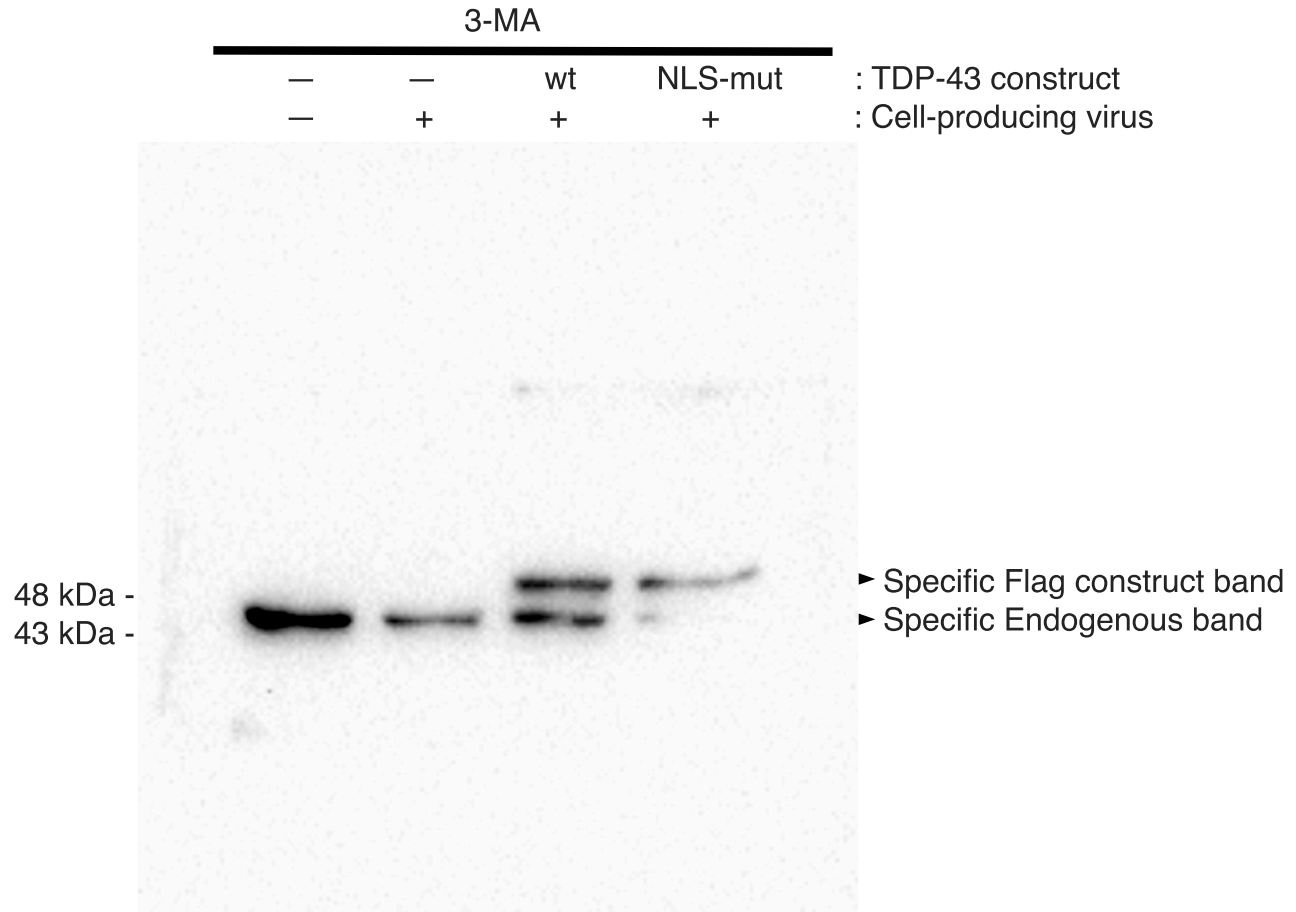

**Figure S4.** Replicate 2 Pr55<sup>Gag</sup> complete gel Western-blot associated with Figure 4A  
Cabrera-Rodríguez, R., *et al.*

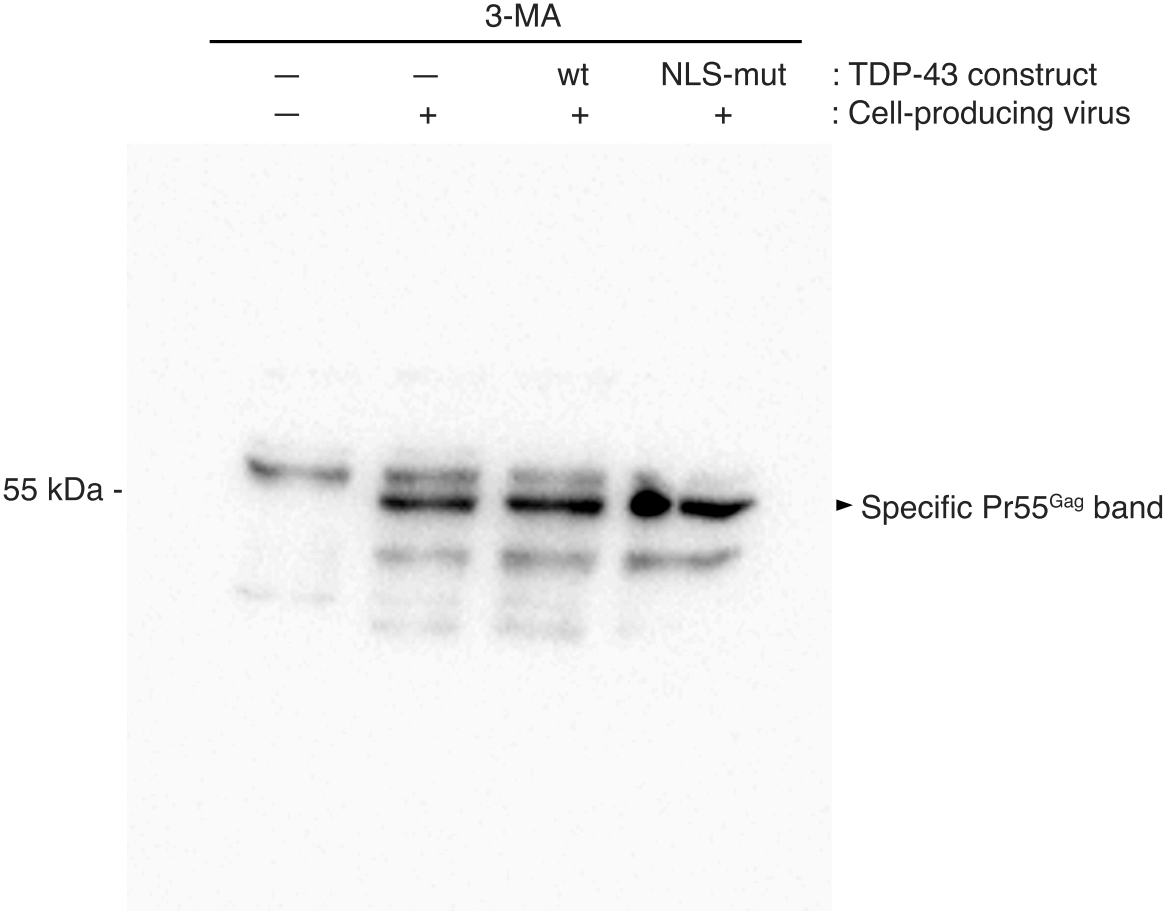



**Figure S4.** Replicate 2 Vif complete gel Western-blot associated with Figure 4A  
Cabrera-Rodríguez, R., *et al.*

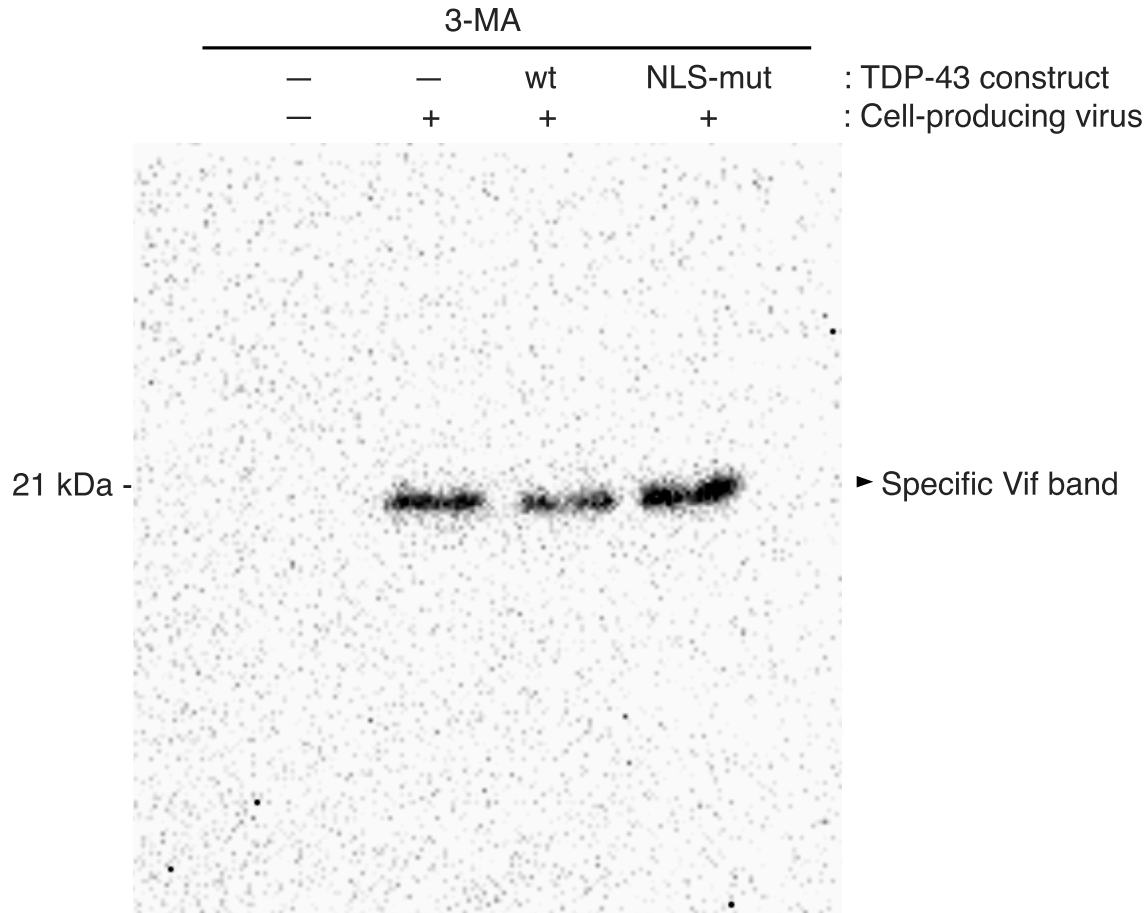

**Figure S4.** Replicate 2 Total  $\alpha$ -tubulin complete gel Western-blot associated with Figure 4A  
Cabrera-Rodríguez, R., *et al.*

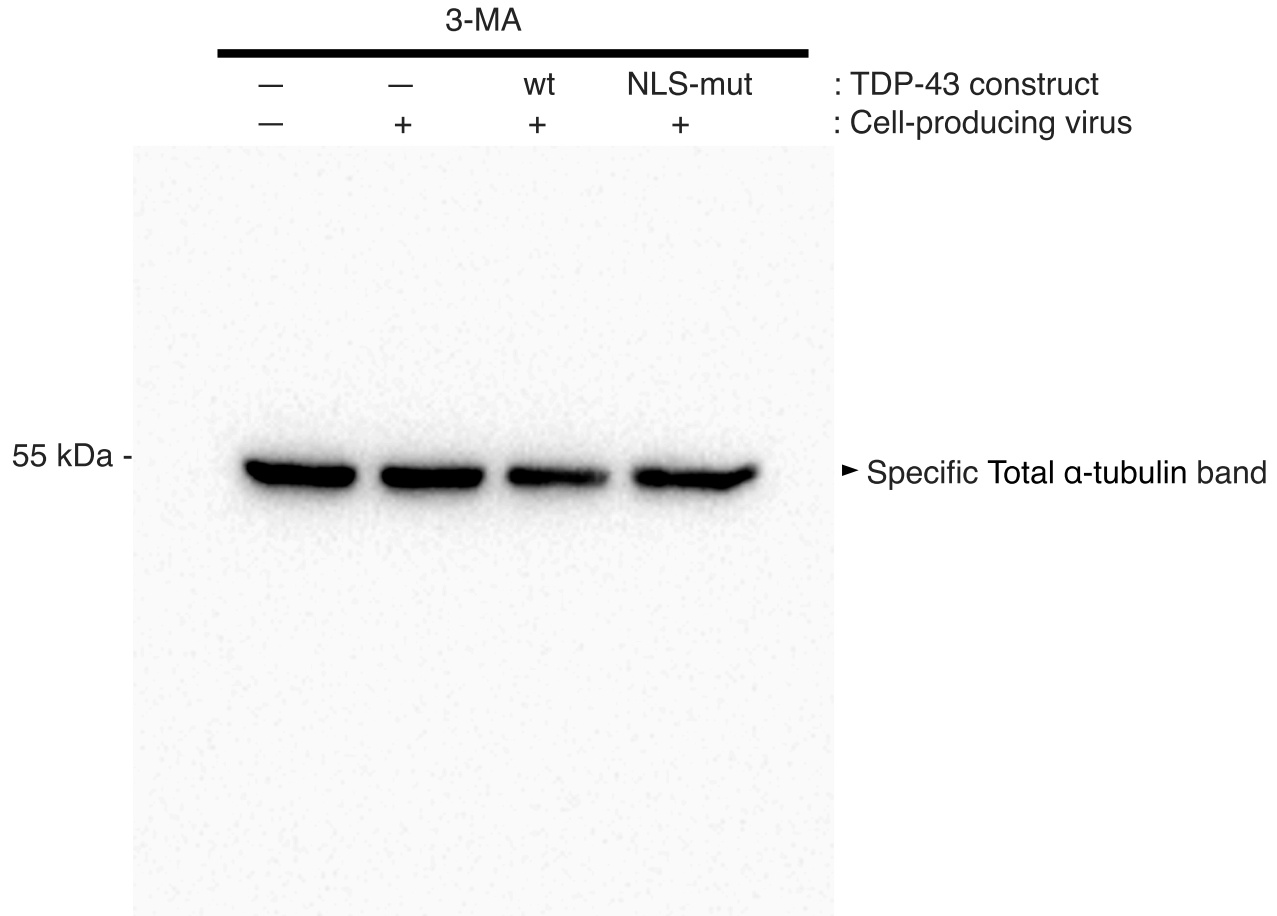

**Figure S4.** Replicate 3 HDAC6 complete gel Western-blot associated with Figure 4A  
Cabrera-Rodríguez, R., *et al.*

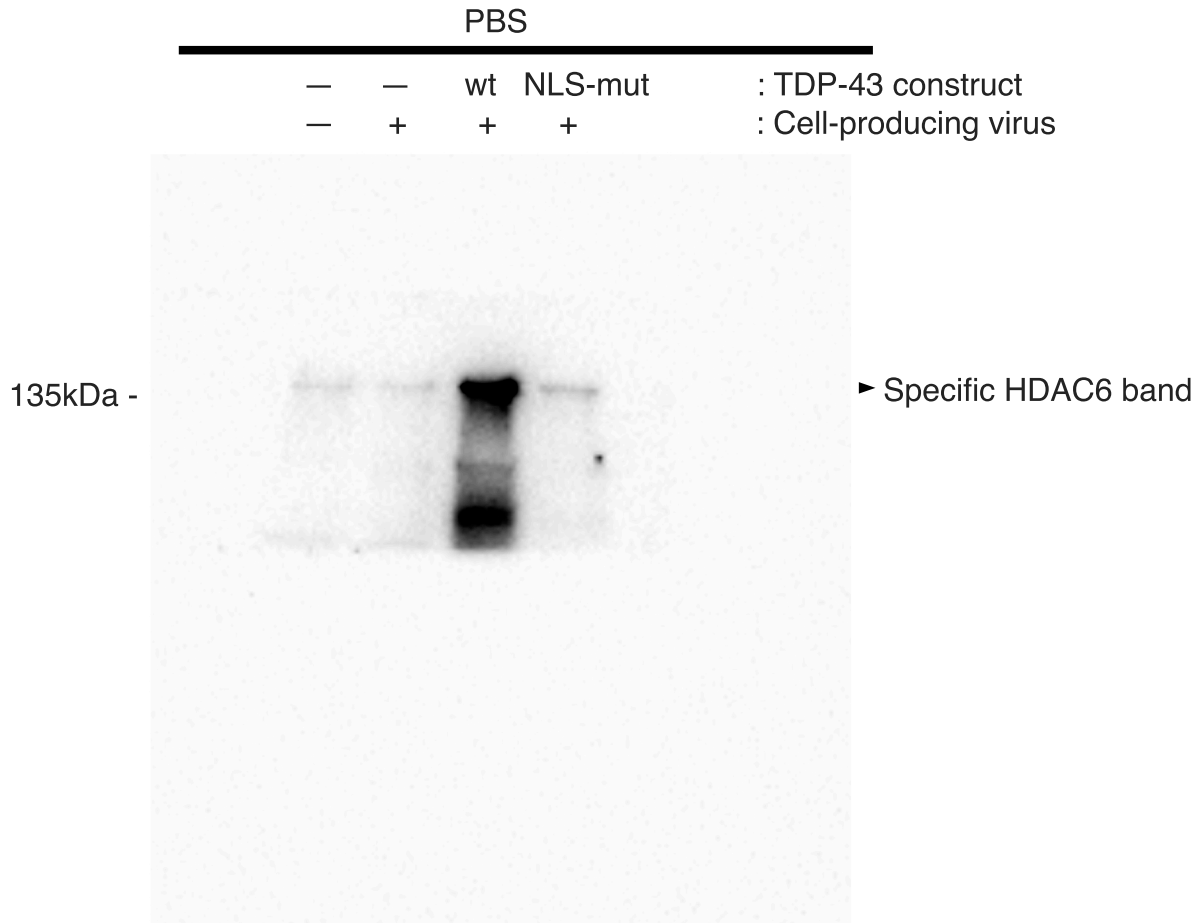

**Figure S4.** Replicate 3 p62 complete gel Western-blot associated with Figure 4A  
Cabrera-Rodríguez, R., *et al.*

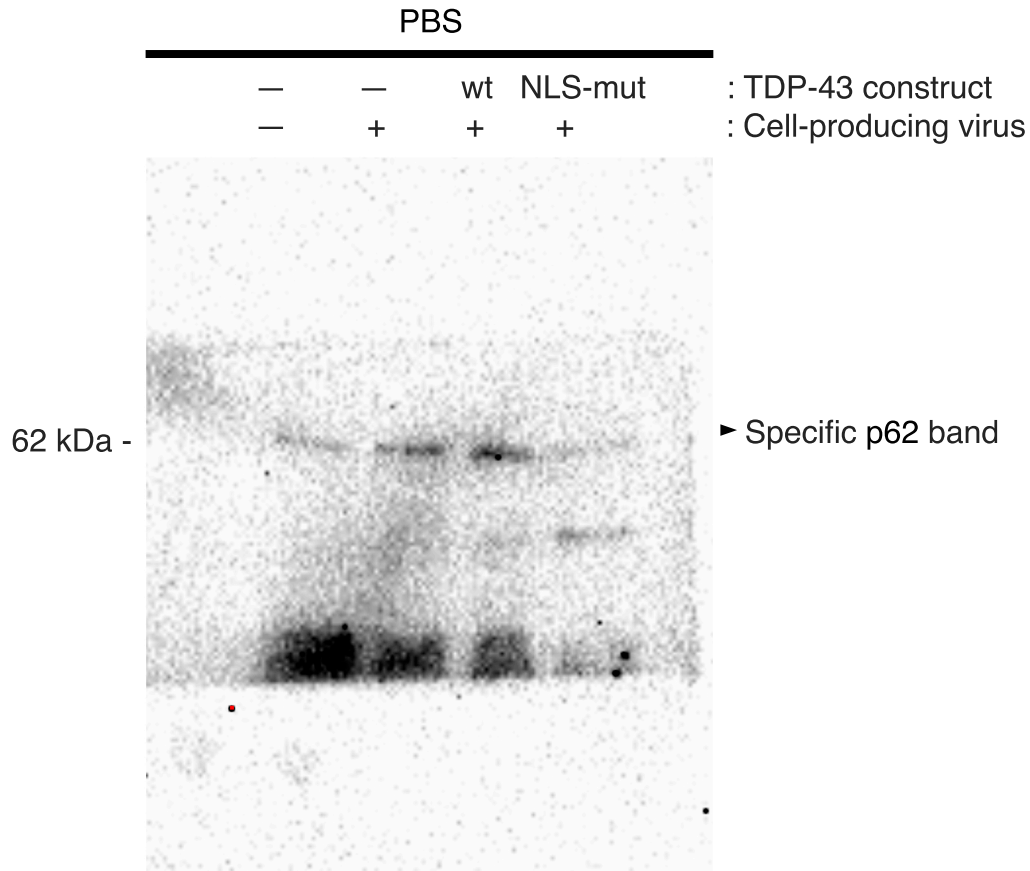

**Figure S4.** Replicate 3 TDP-43 complete gel Western-blot associated with Figure 4A  
Cabrera-Rodríguez, R., *et al.*

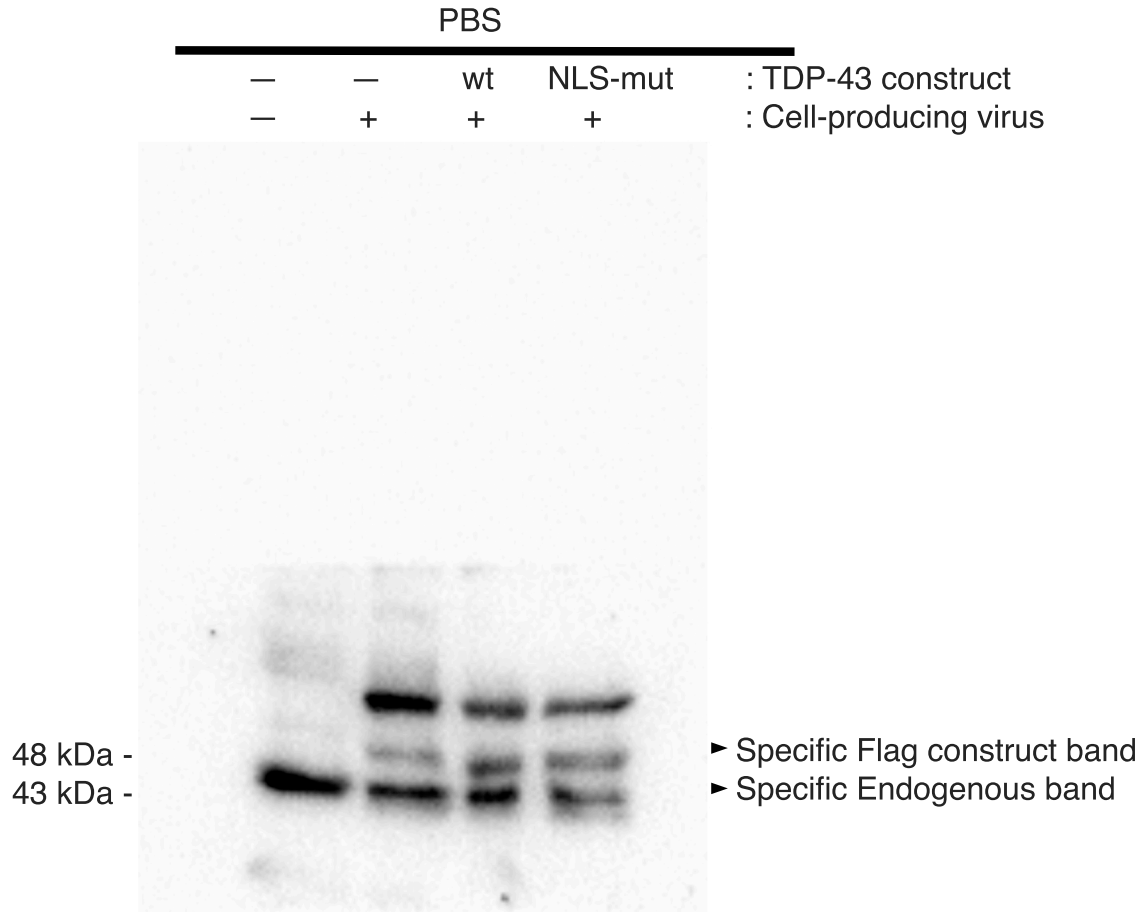

**Figure S4.** Replicate 3 Pr55<sup>Gag</sup> complete gel Western-blot associated with Figure 4A  
Cabrera-Rodríguez, R., *et al.*

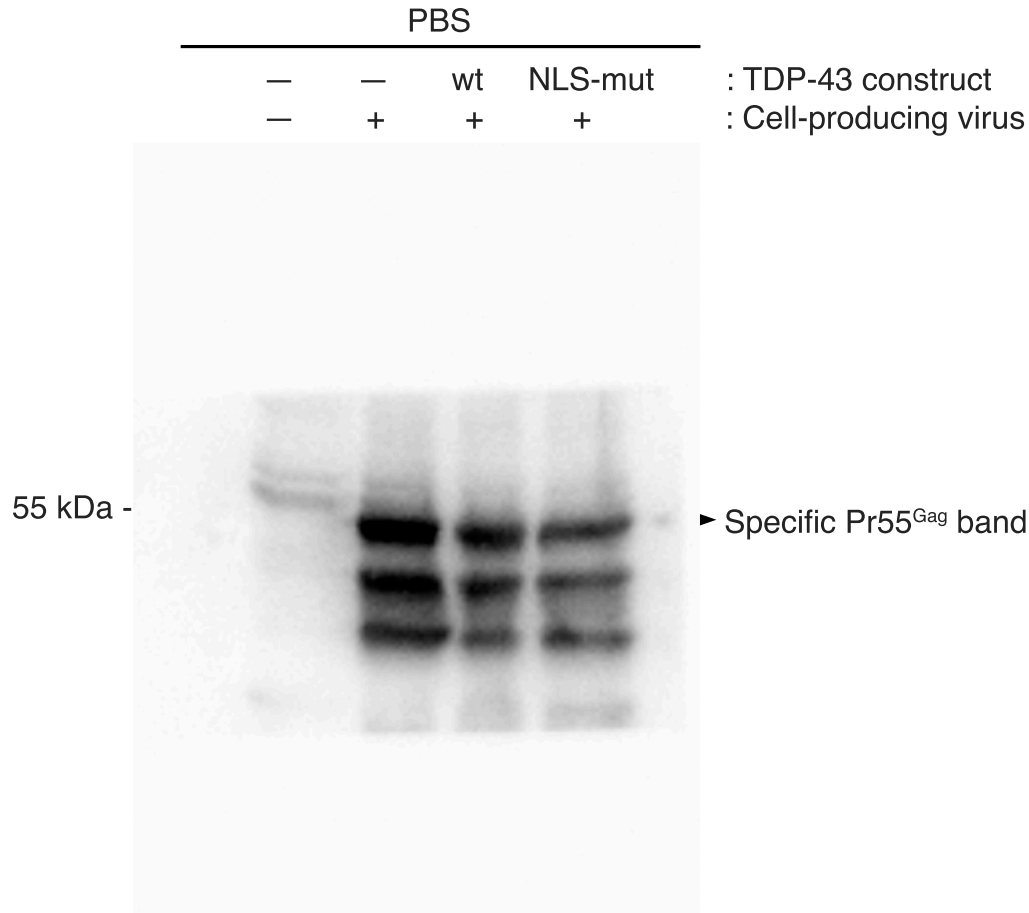

**Figure S4.** Replicate 3 Vif complete gel Western-blot associated with Figure 4A  
Cabrera-Rodríguez, R., *et al.*

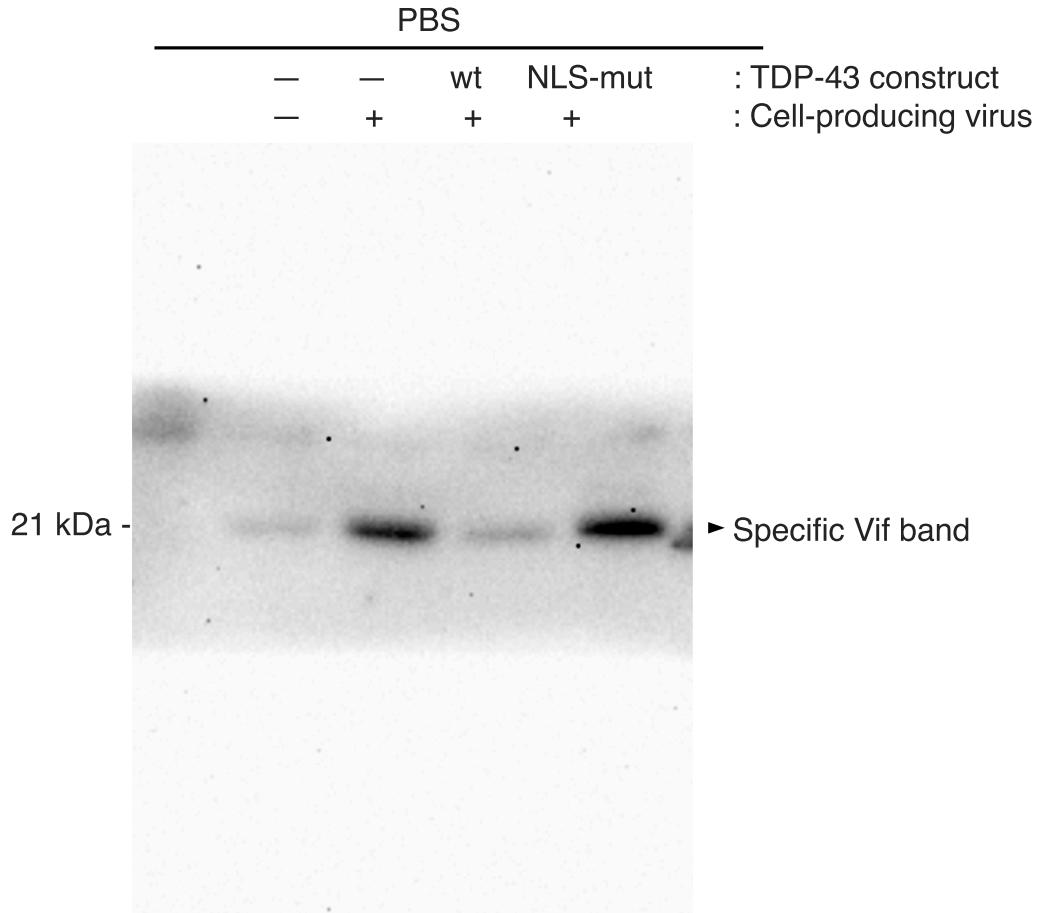

**Figure S4.** Replicate 3 Total  $\alpha$ -tubulin complete gel Western-blot associated with Figure 4A  
Cabrera-Rodríguez, R., *et al.*

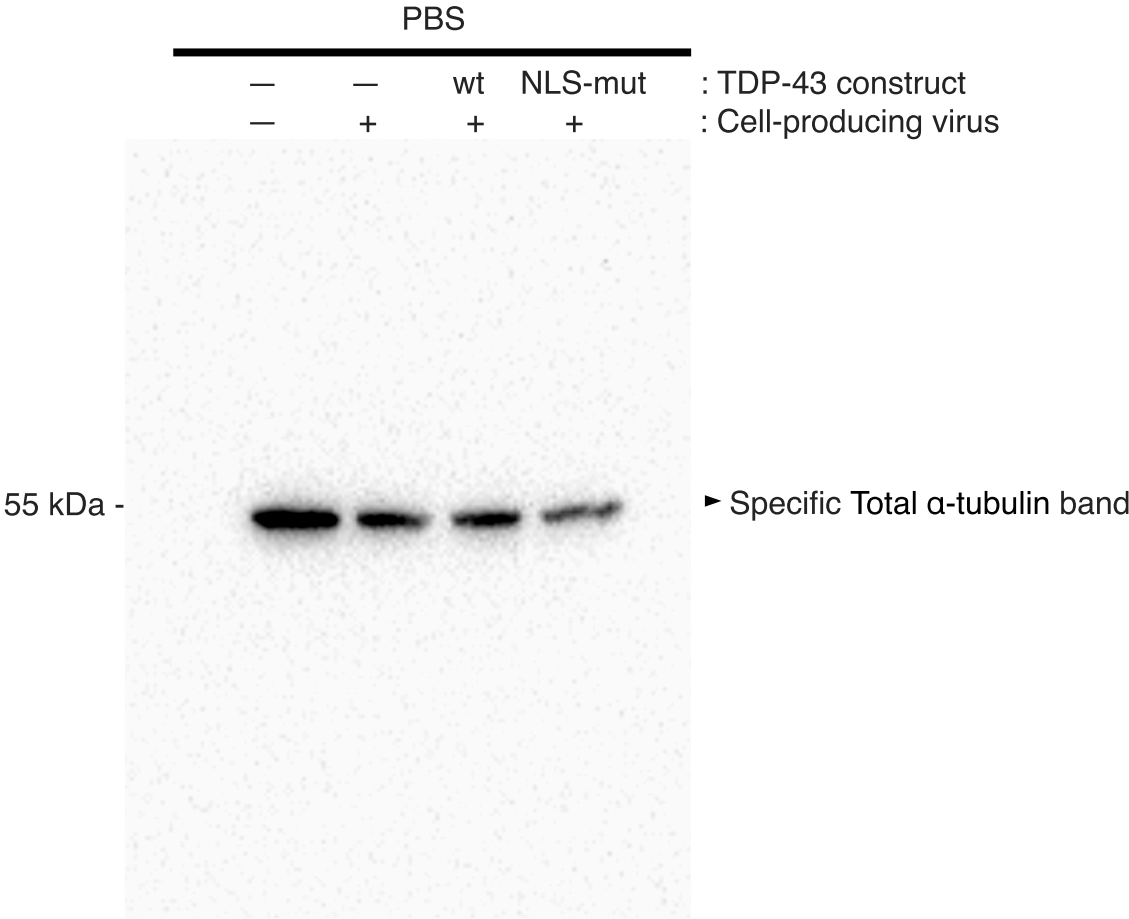



**Figure S4.** Replicate 3 HDAC6 complete gel Western-blot associated with Figure 4A  
Cabrera-Rodríguez, R., *et al.*

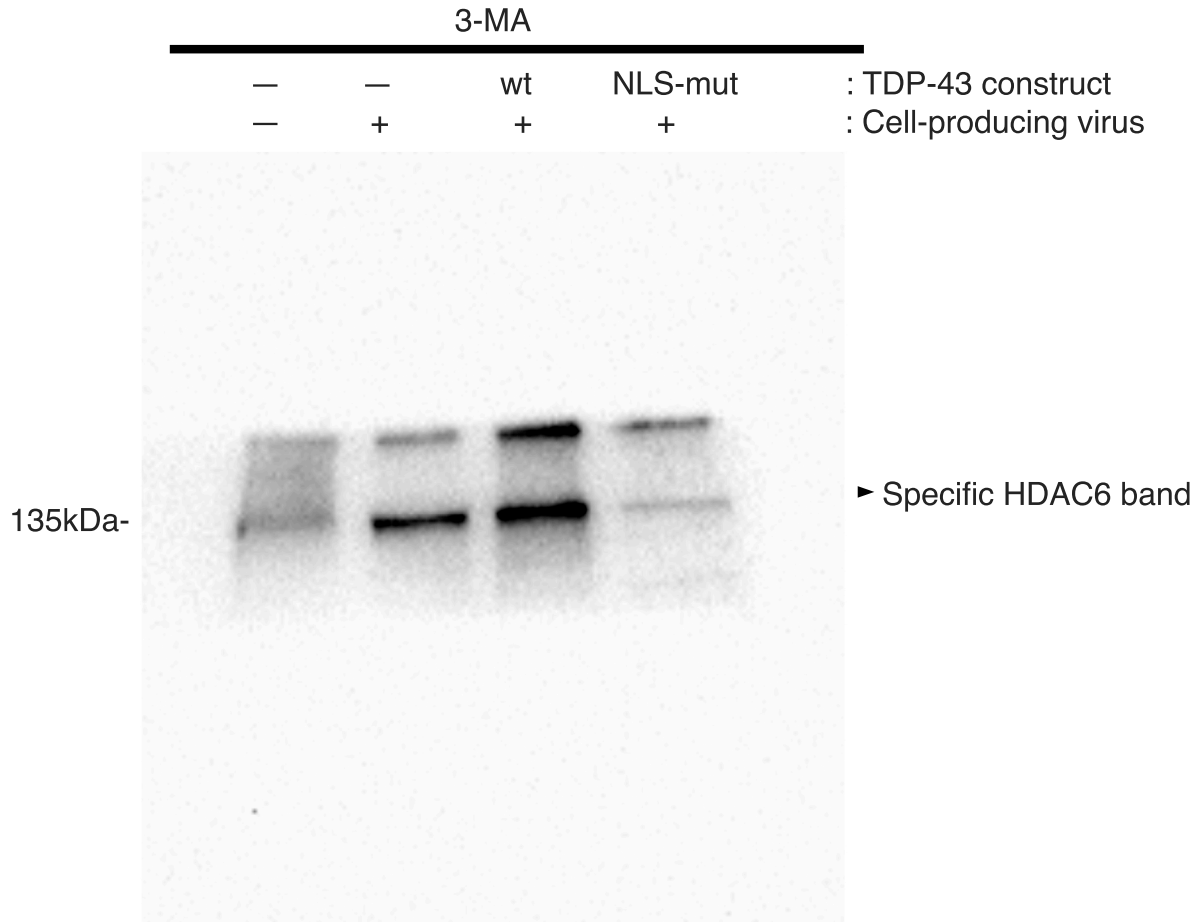

**Figure S4.** Replicate 3 p62 complete gel Western-blot associated with Figure 4A  
Cabrera-Rodríguez, R., *et al.*

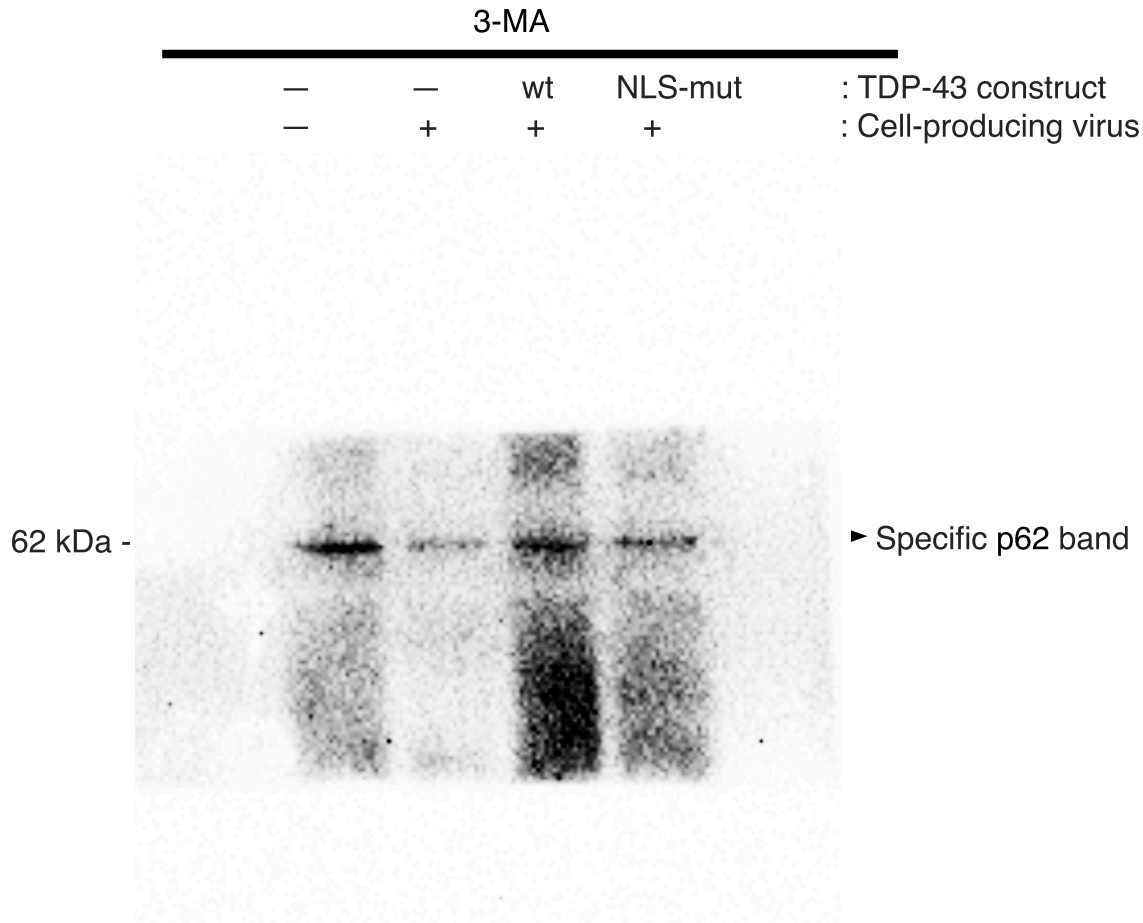

**Figure S4.** Replicate 3 TDP-43 complete gel Western-blot associated with Figure 4A  
Cabrera-Rodríguez, R., *et al.*

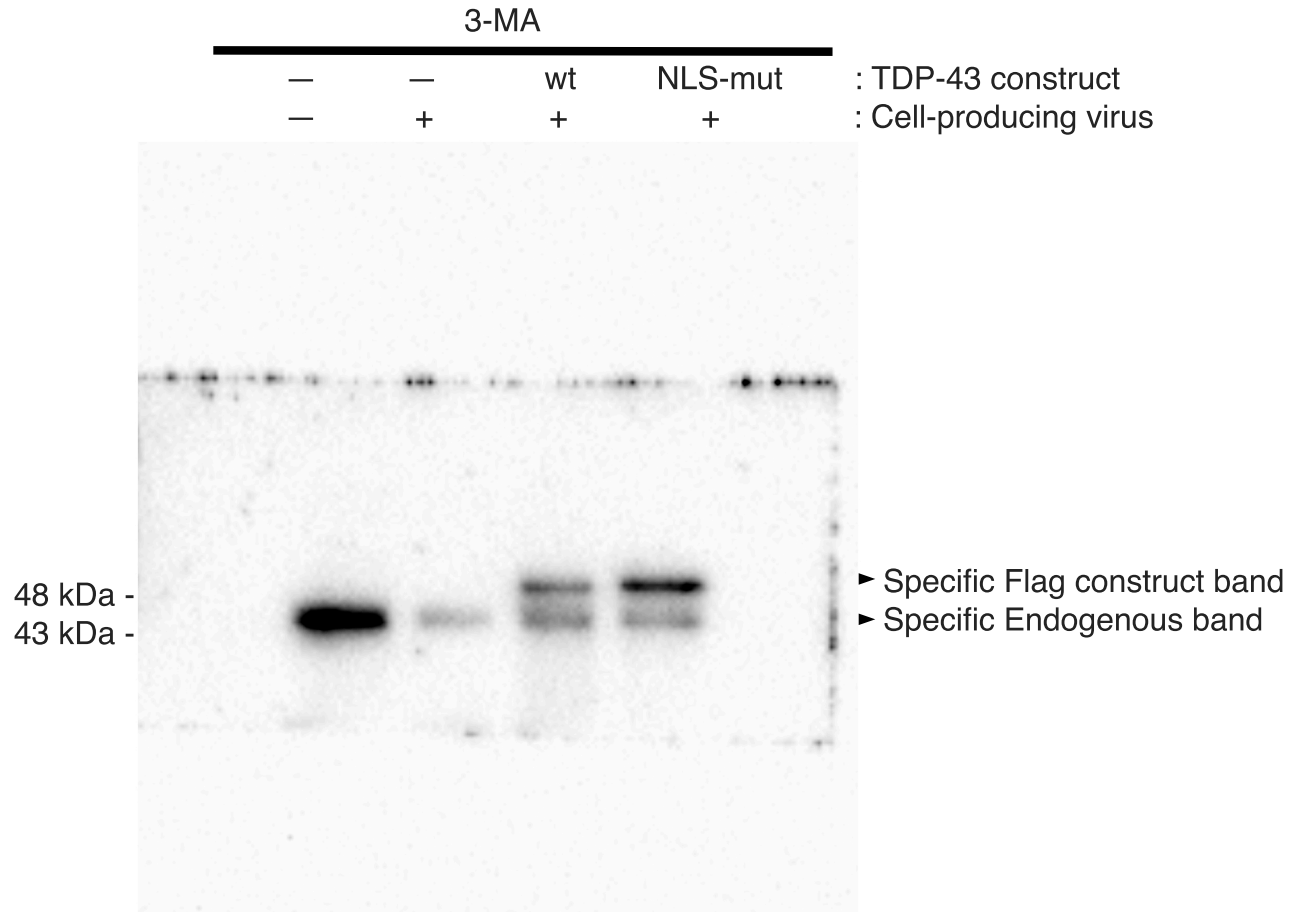

**Figure S4.** Replicate 3 Pr55<sup>Gag</sup> complete gel Western-blot associated with Figure 4A  
Cabrera-Rodríguez, R., *et al.*

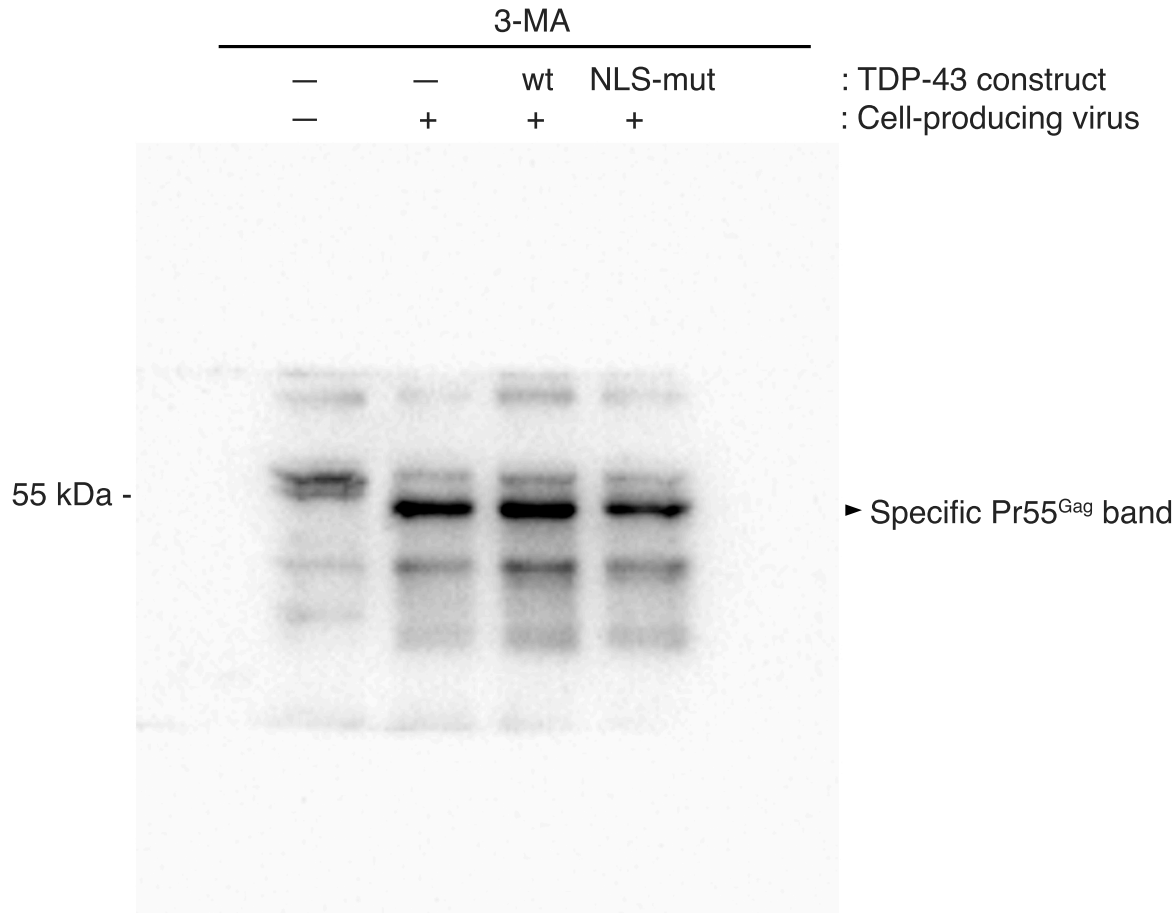

**Figure S4.** Replicate 3 Vif complete gel Western-blot associated with Figure 4A  
Cabrera-Rodríguez, R., *et al.*

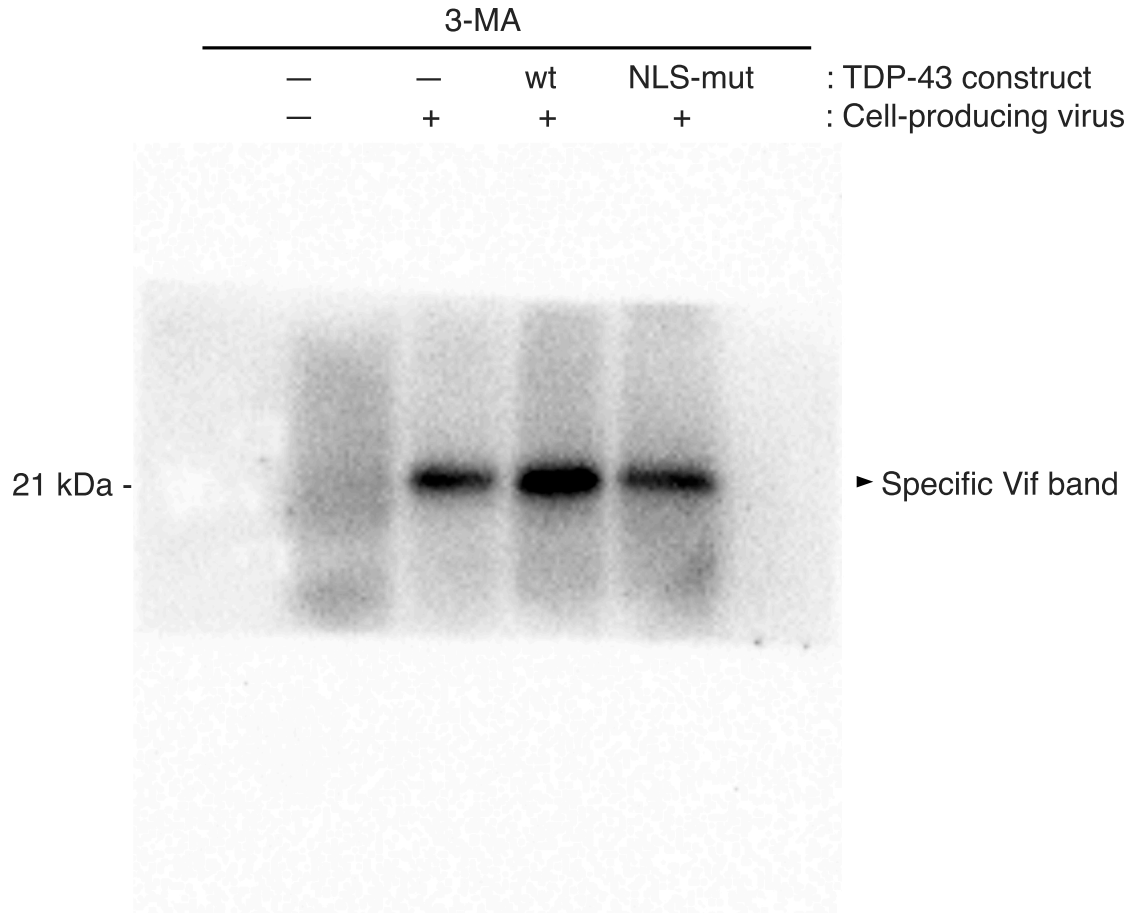

**Figure S4.** Replicate 3 Total  $\alpha$ -tubulin complete gel Western-blot associated with Figure 4A  
Cabrera-Rodríguez, R., *et al.*

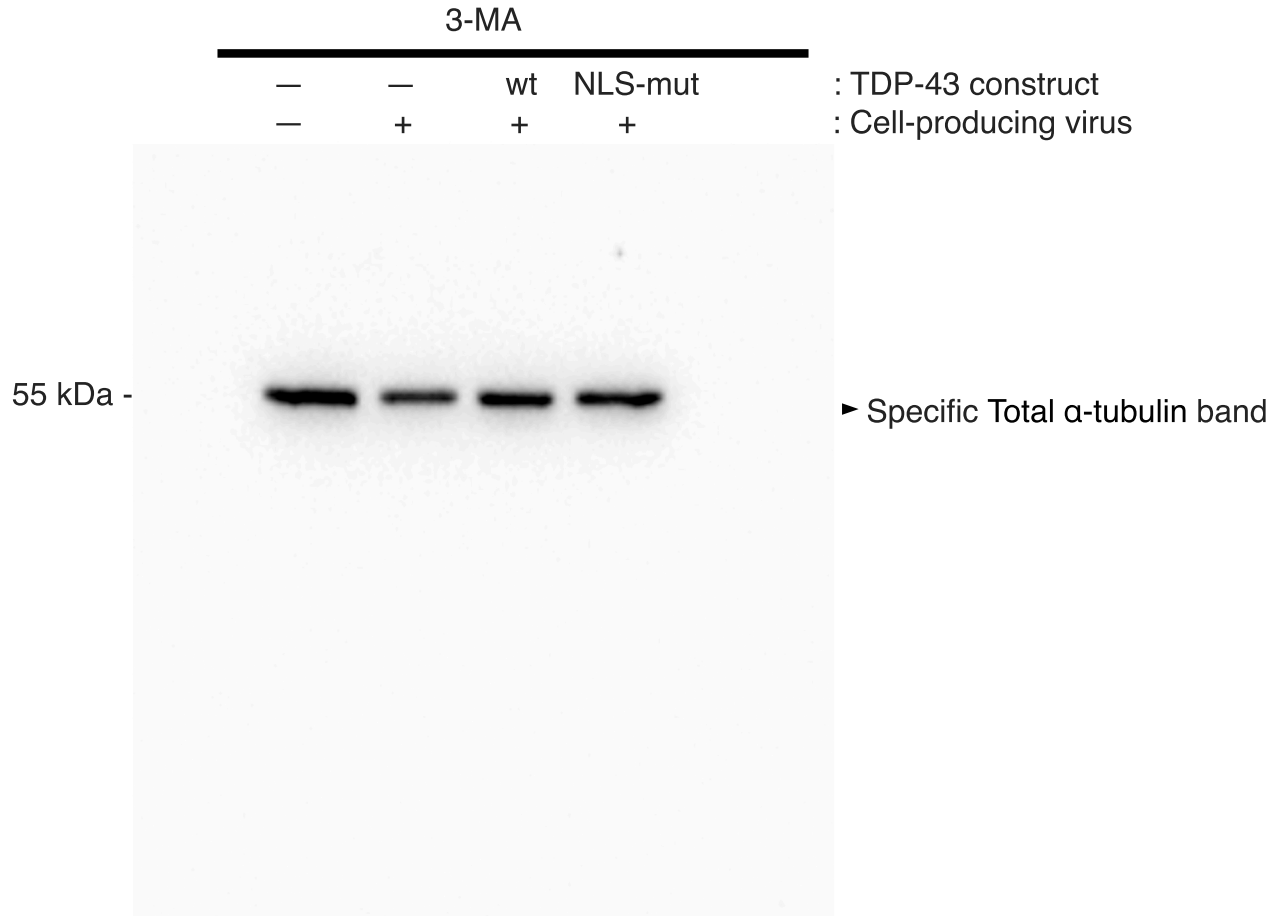

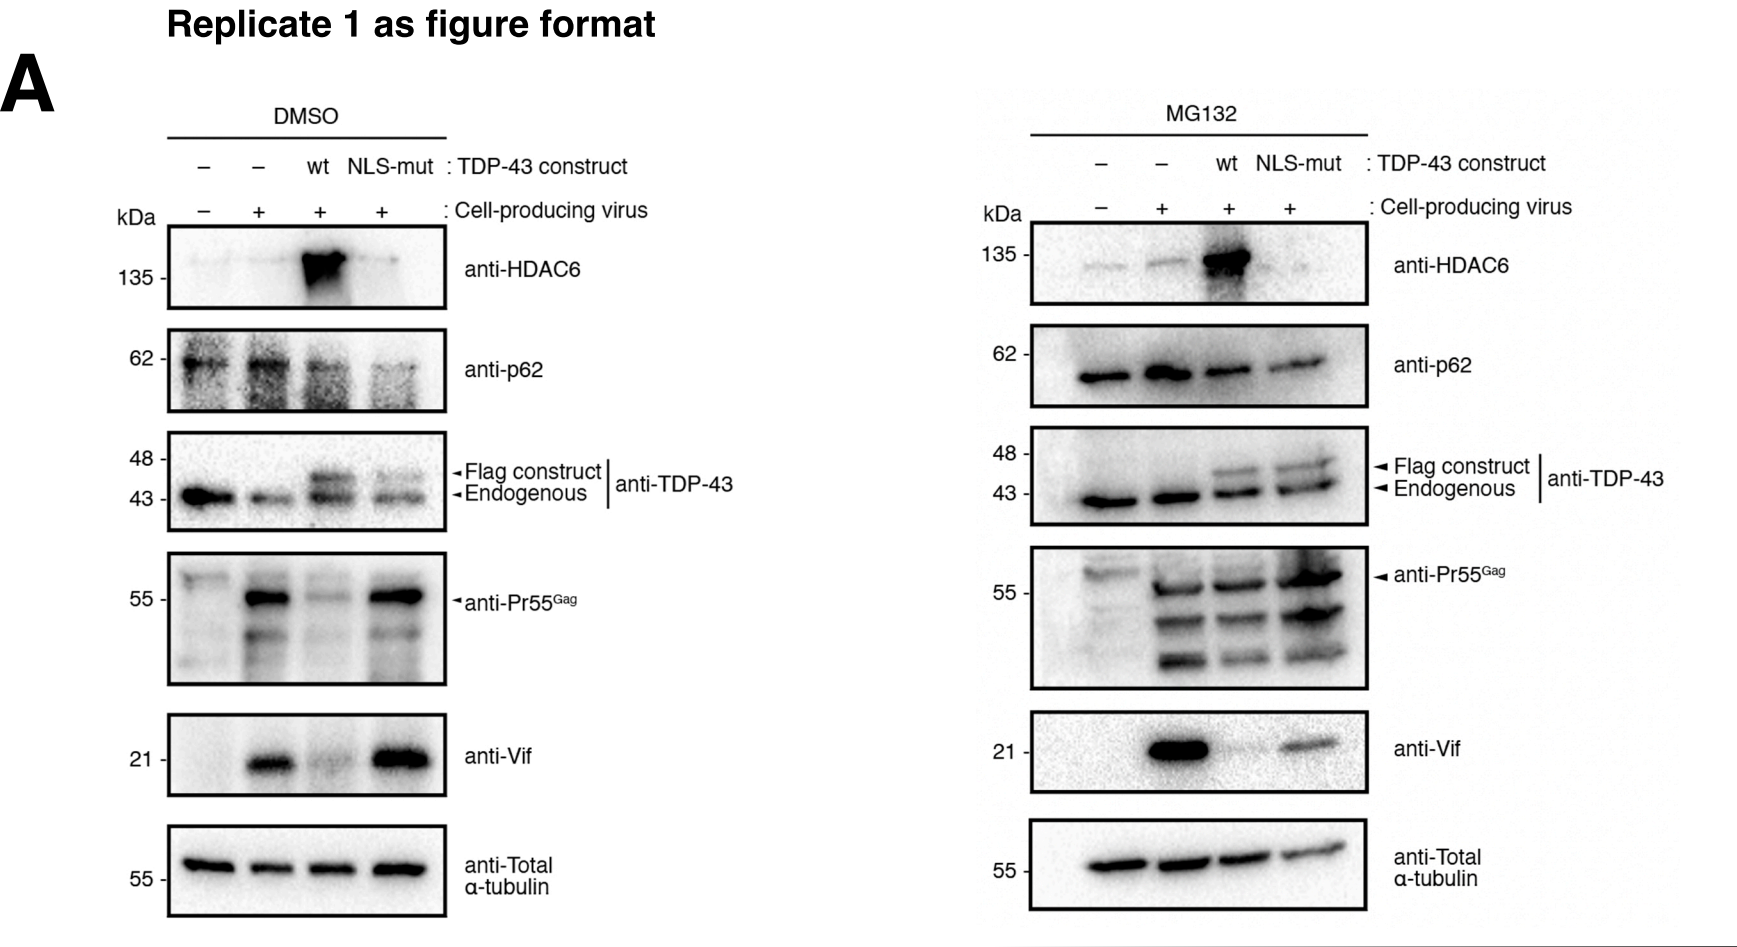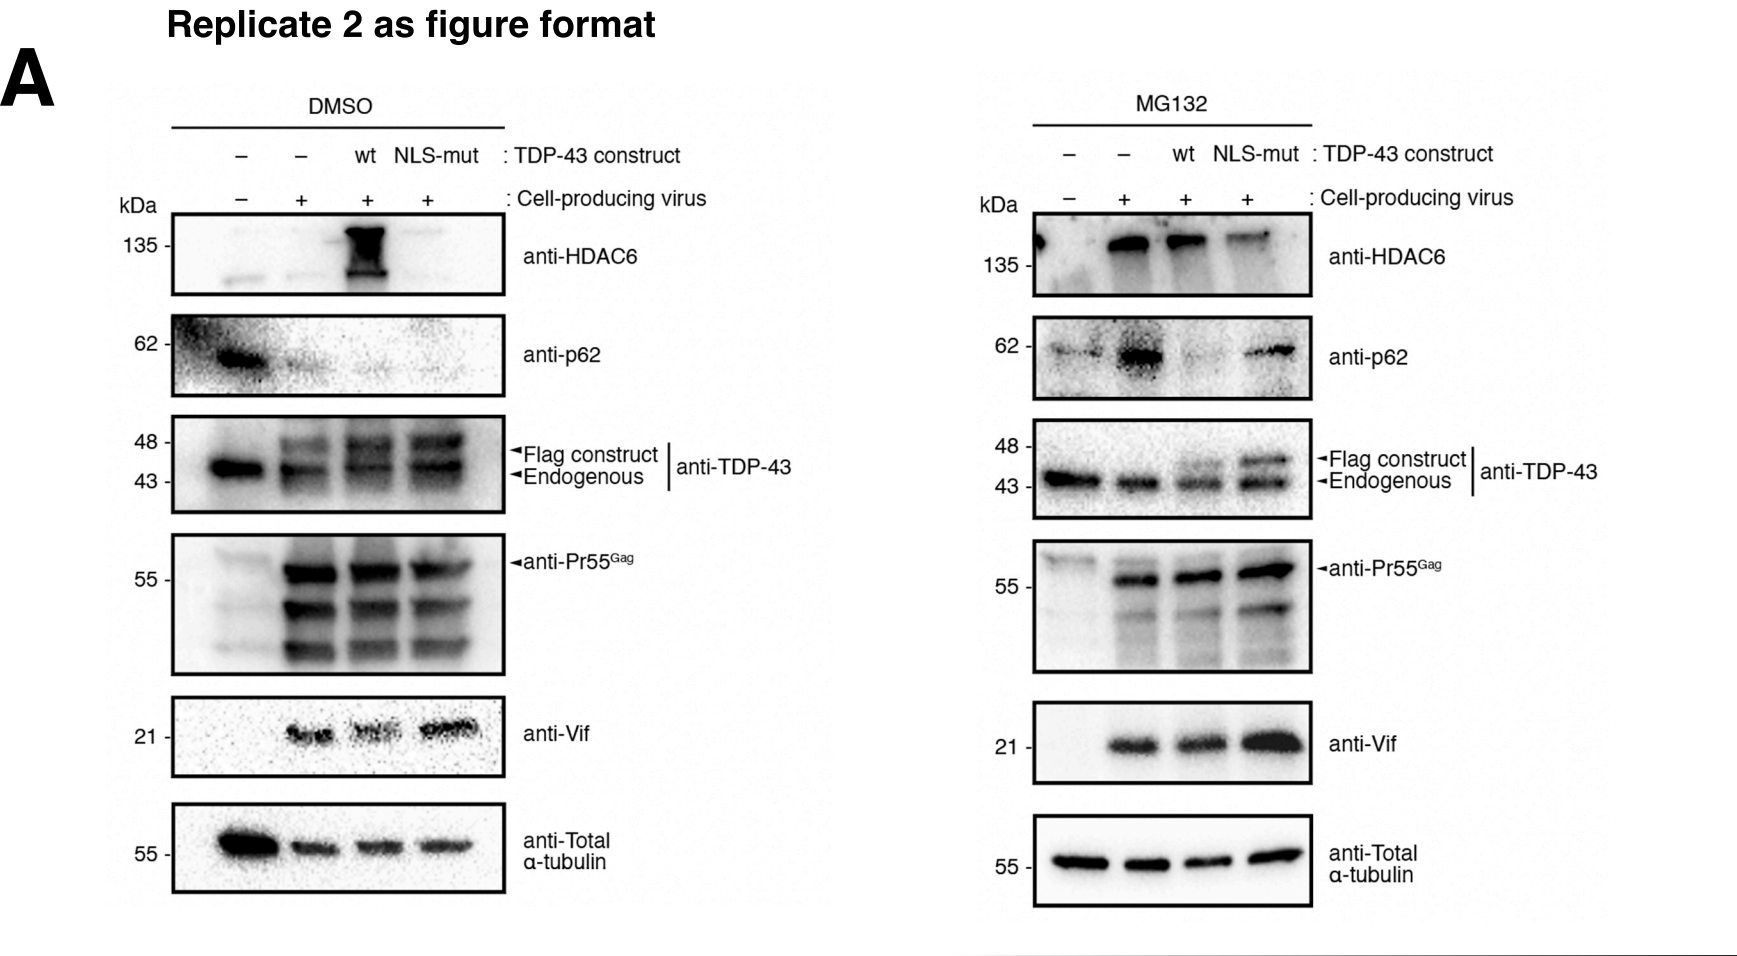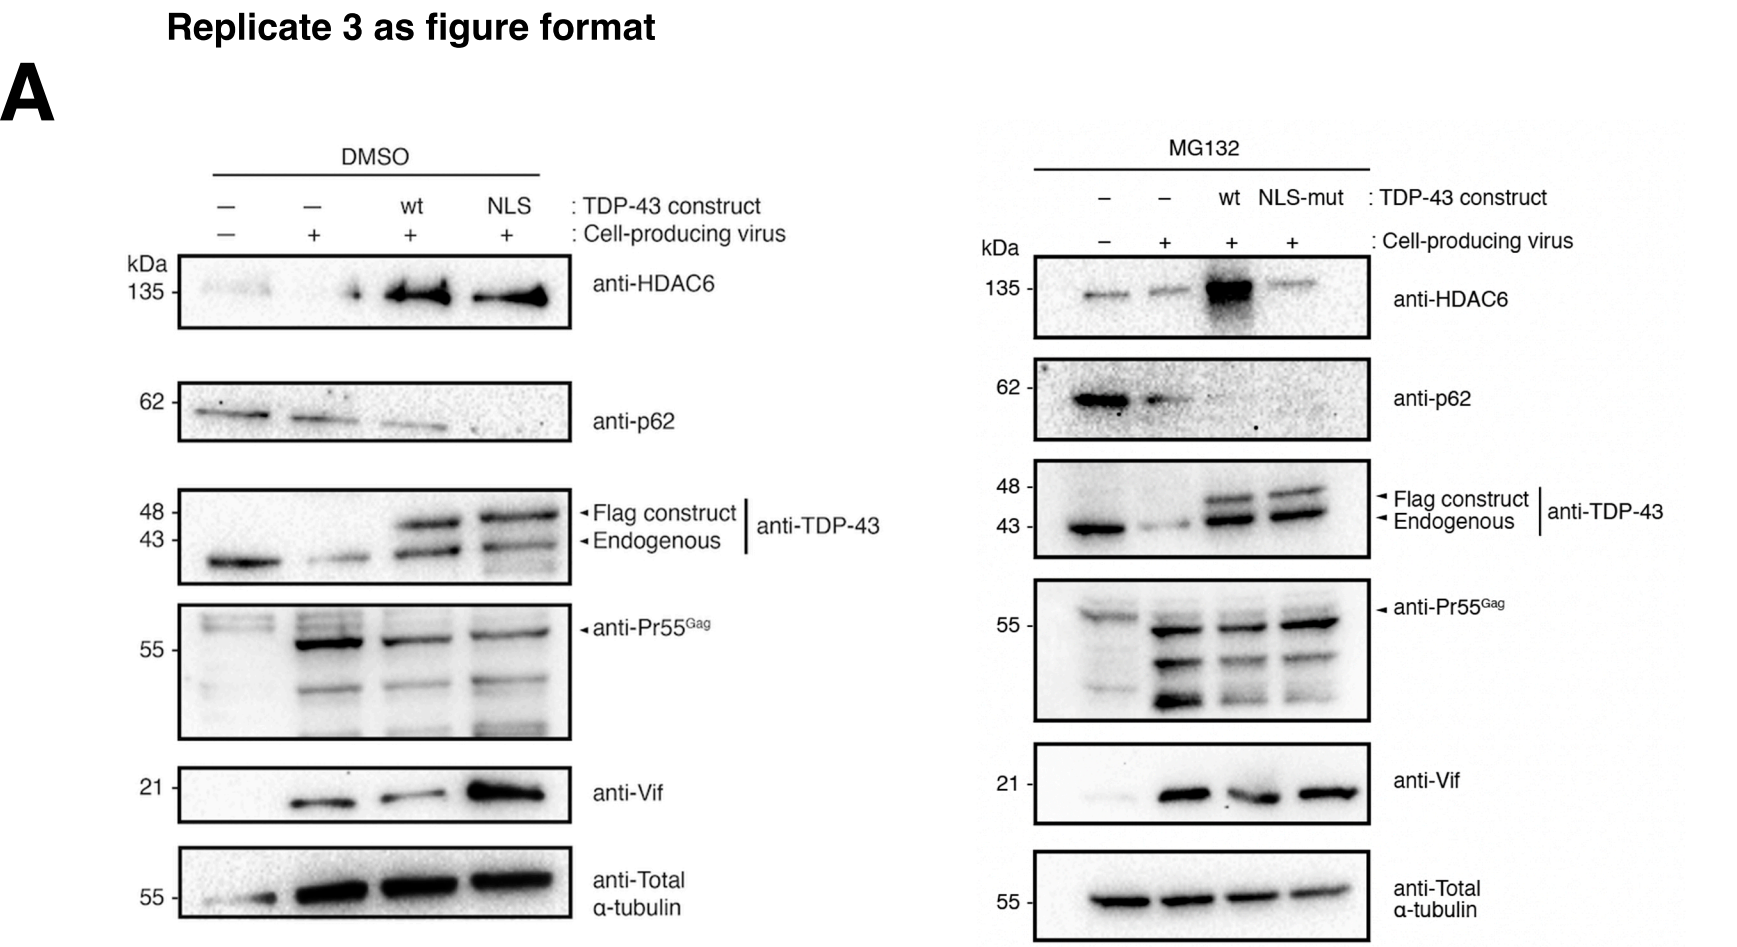

**Figure S5.** Replicate 1 HDAC6 complete gel Western-blot associated with Figure 5A  
Cabrera-Rodríguez, R., *et al.*

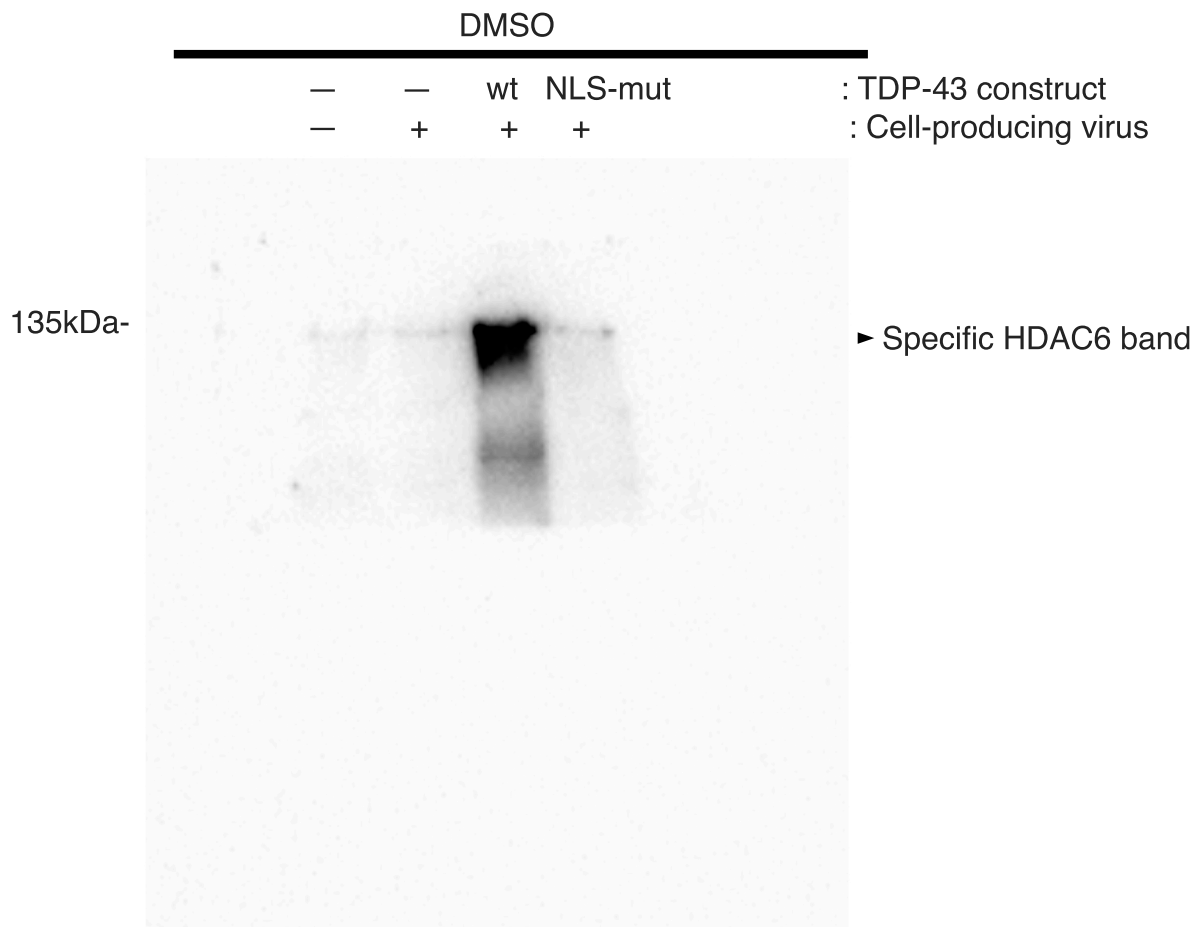



**Figure S5.** Replicate 1 p62 complete gel Western-blot associated with Figure 5A  
Cabrera-Rodríguez, R., *et al.*

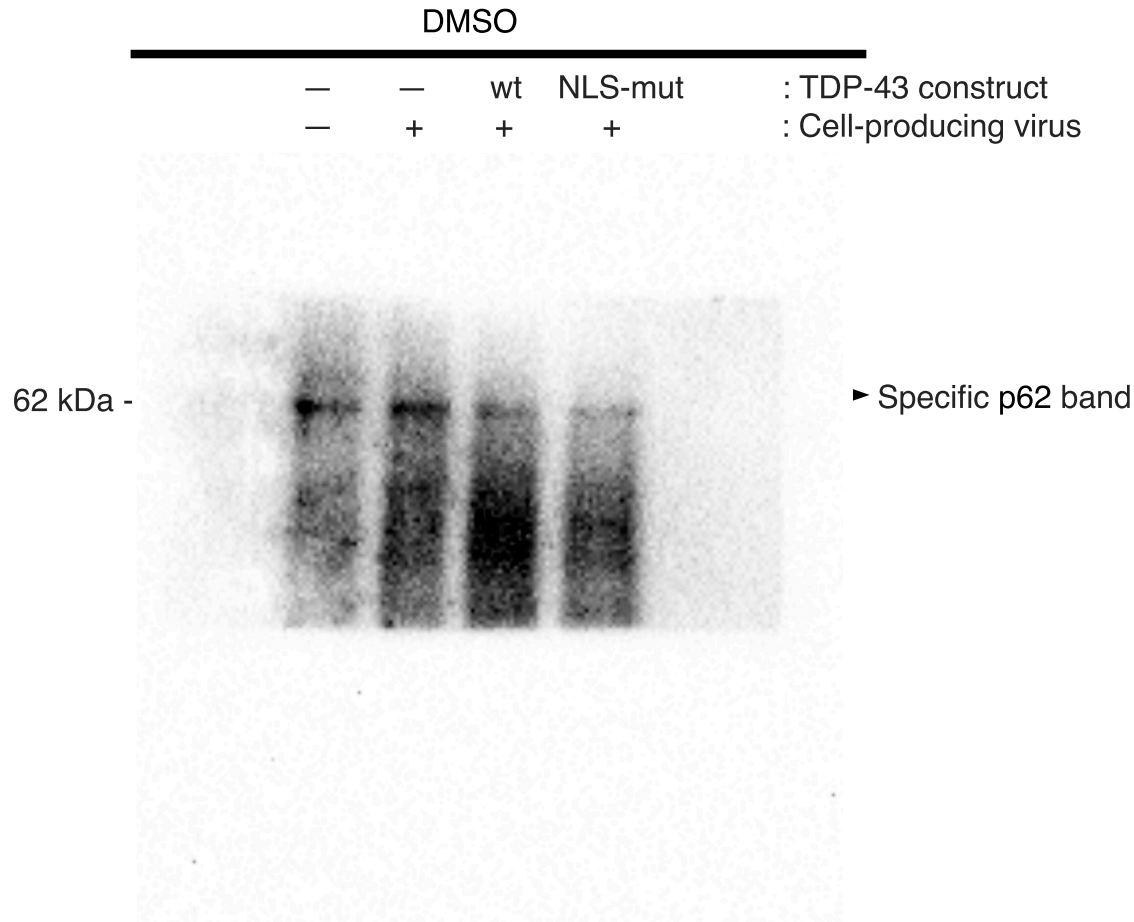

**Figure S5.** Replicate 1 TDP-43 complete gel Western-blot associated with Figure 5A  
Cabrera-Rodríguez, R., *et al.*

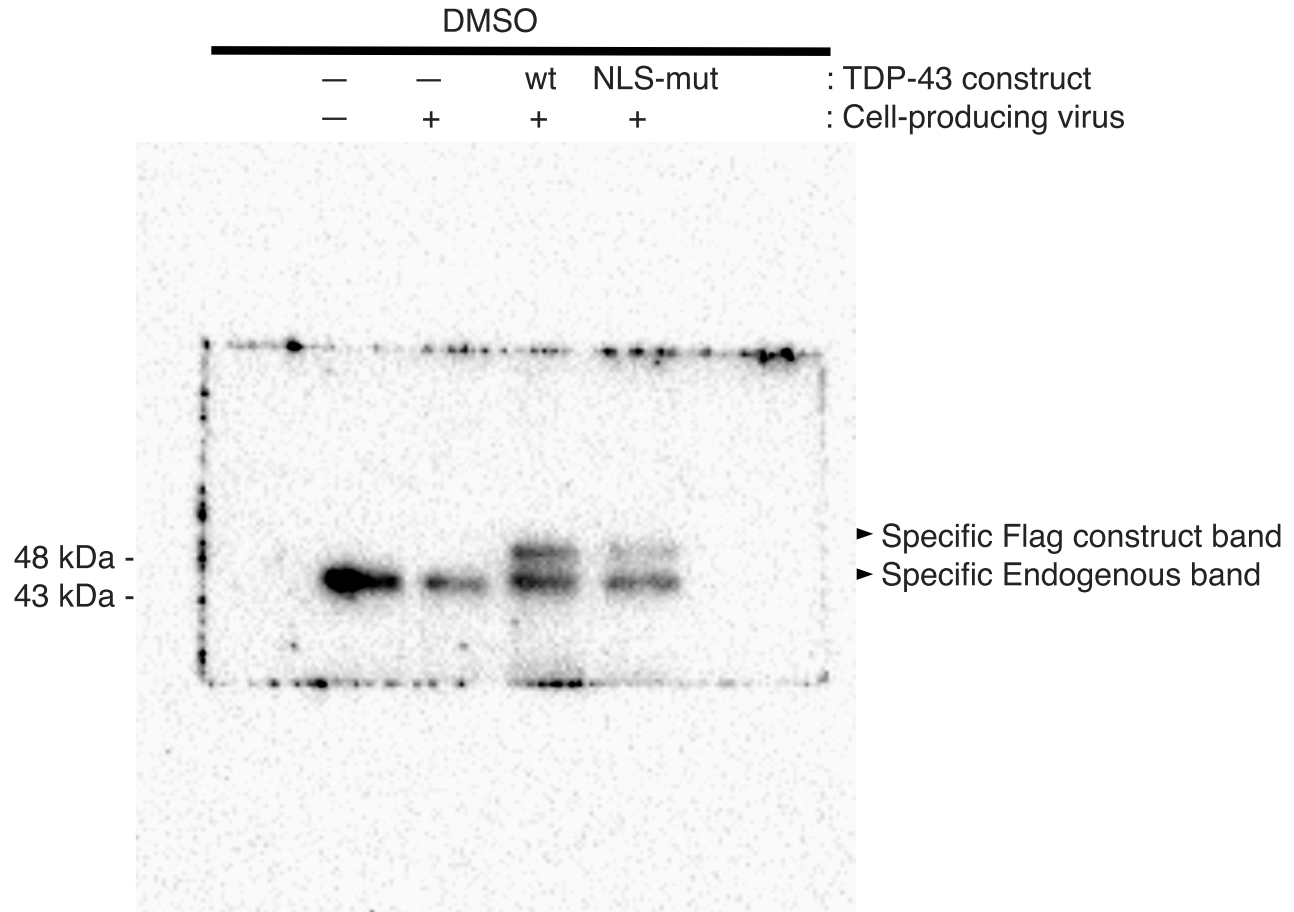

**Figure S5.** Replicate 1 Pr55<sup>Gag</sup> complete gel Western-blot associated with Figure 5A  
Cabrera-Rodríguez, R., *et al.*

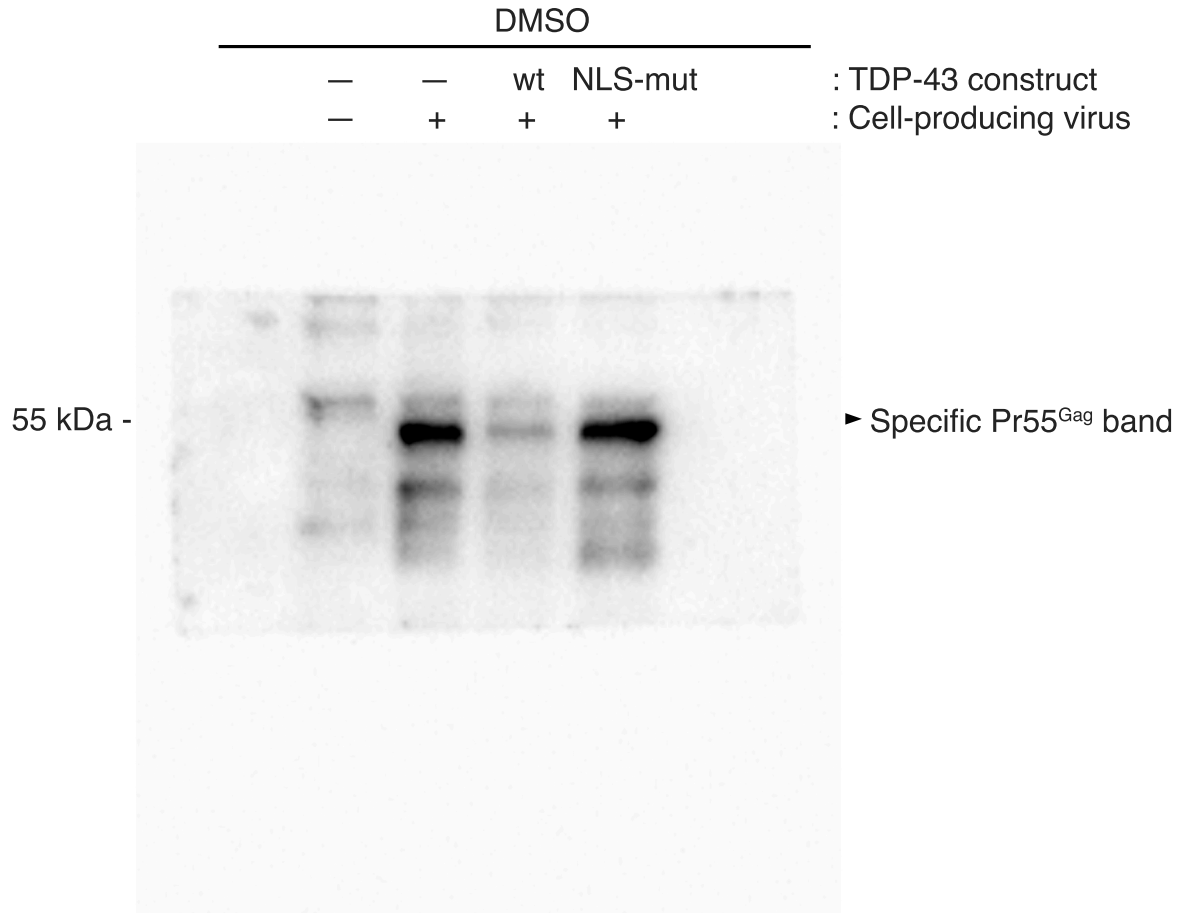

**Figure S5.** Replicate 1 Vif complete gel Western-blot associated with Figure 5A  
Cabrera-Rodríguez, R., *et al.*

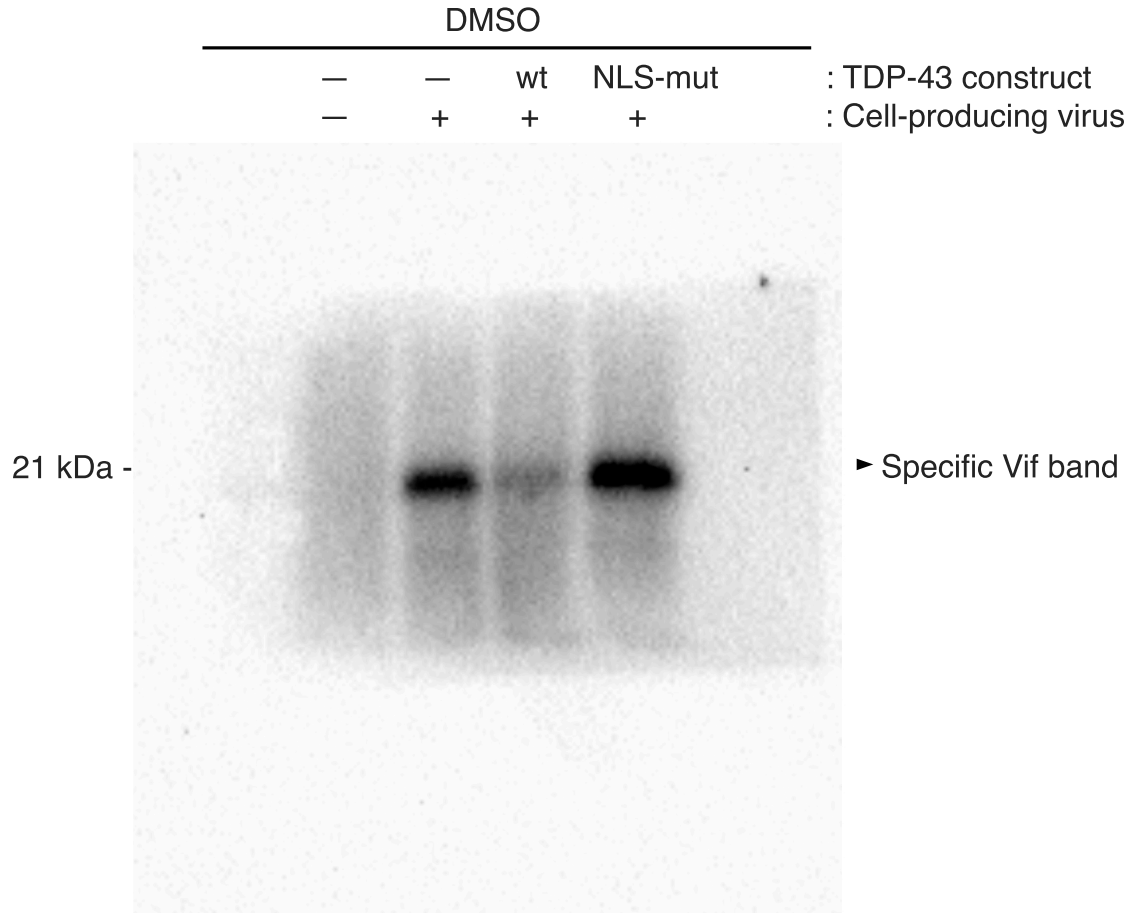

**Figure S5.** Replicate 1 Total  $\alpha$ -tubulin complete gel Western-blot associated with Figure 5A  
Cabrera-Rodríguez, R., *et al.*

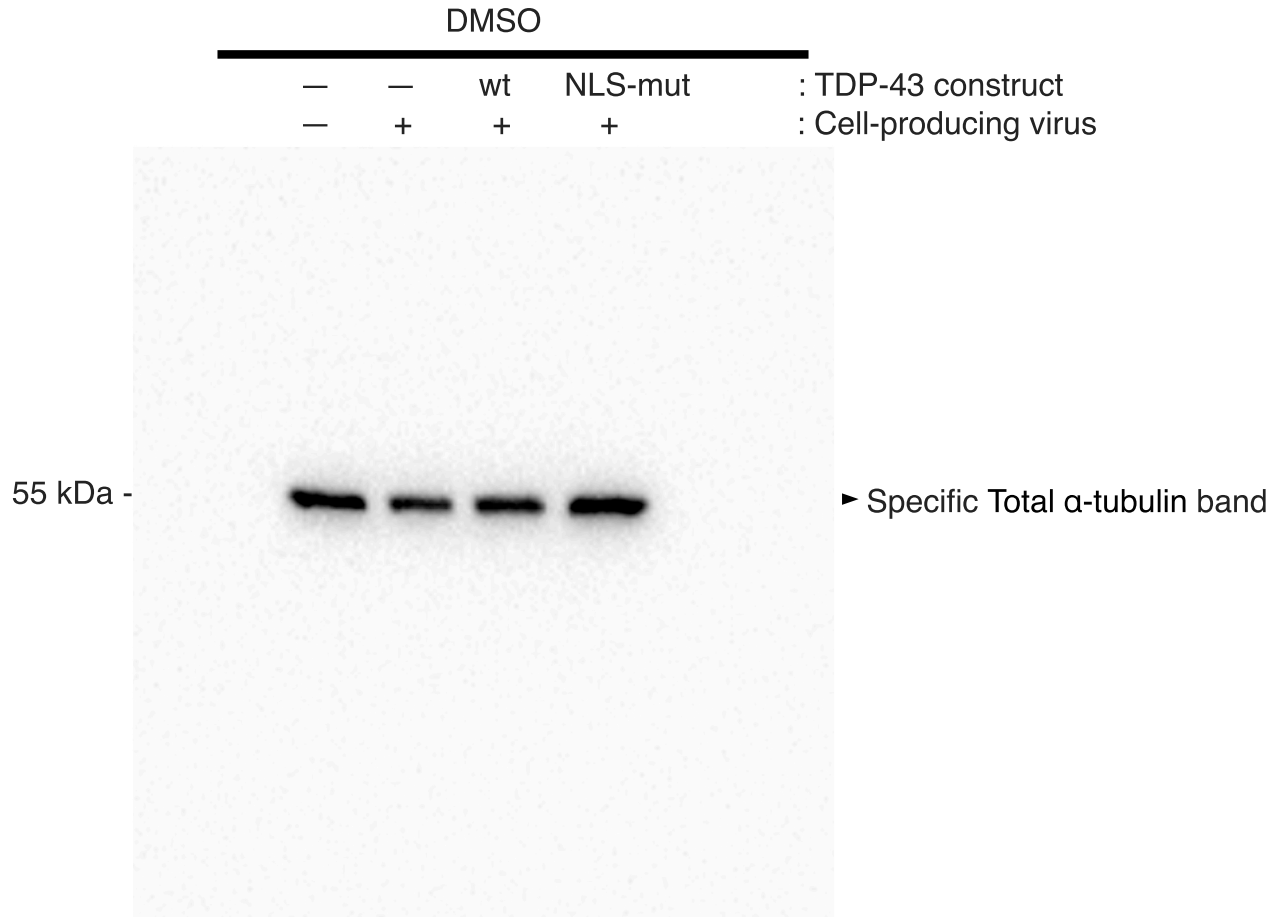

**Figure S5.** Replicate 1 HDAC6 complete gel Western-blot associated with Figure 5A  
Cabrera-Rodríguez, R., *et al.*

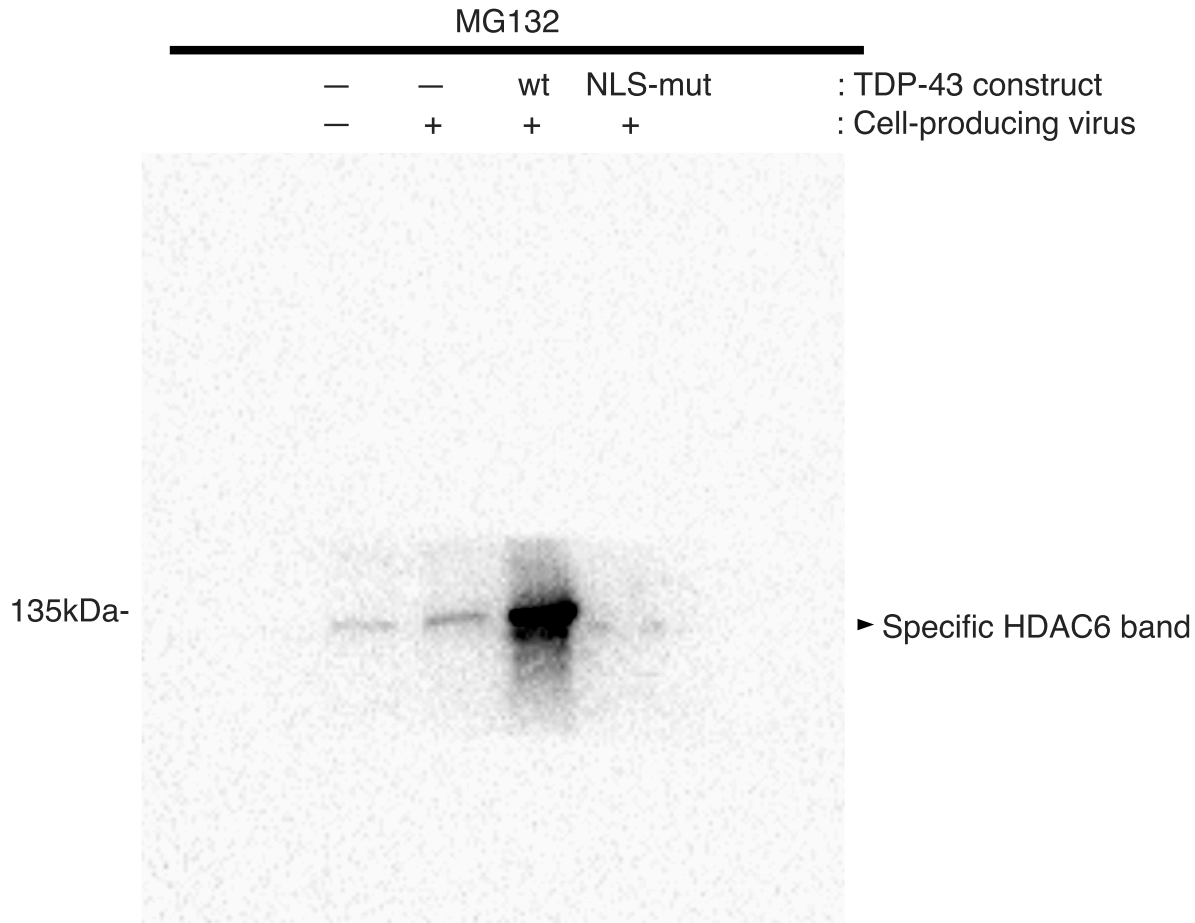

**Figure S5.** Replicate 1 p62 complete gel Western-blot associated with Figure 5A  
Cabrera-Rodríguez, R., *et al.*

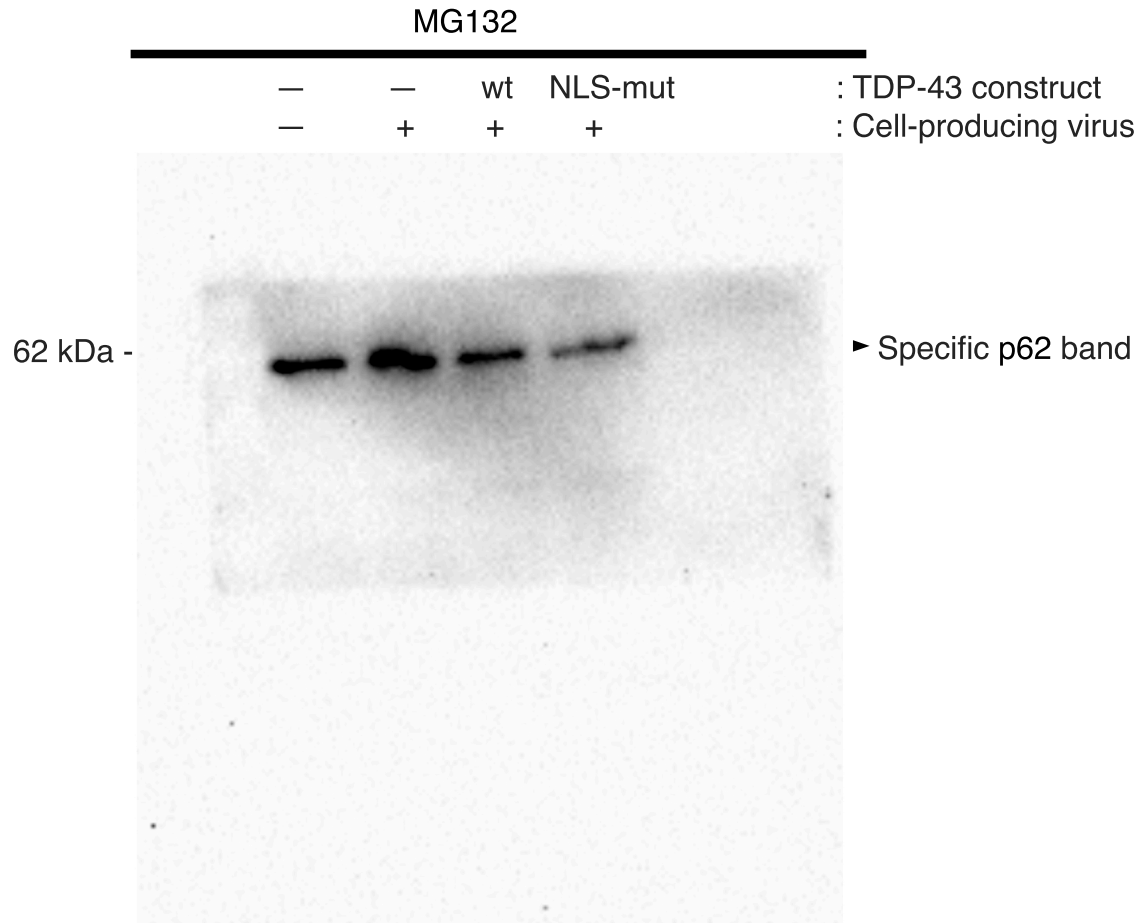

**Figure S5.** Replicate 1 TDP-43 complete gel Western-blot associated with Figure 5A  
Cabrera-Rodríguez, R., *et al.*

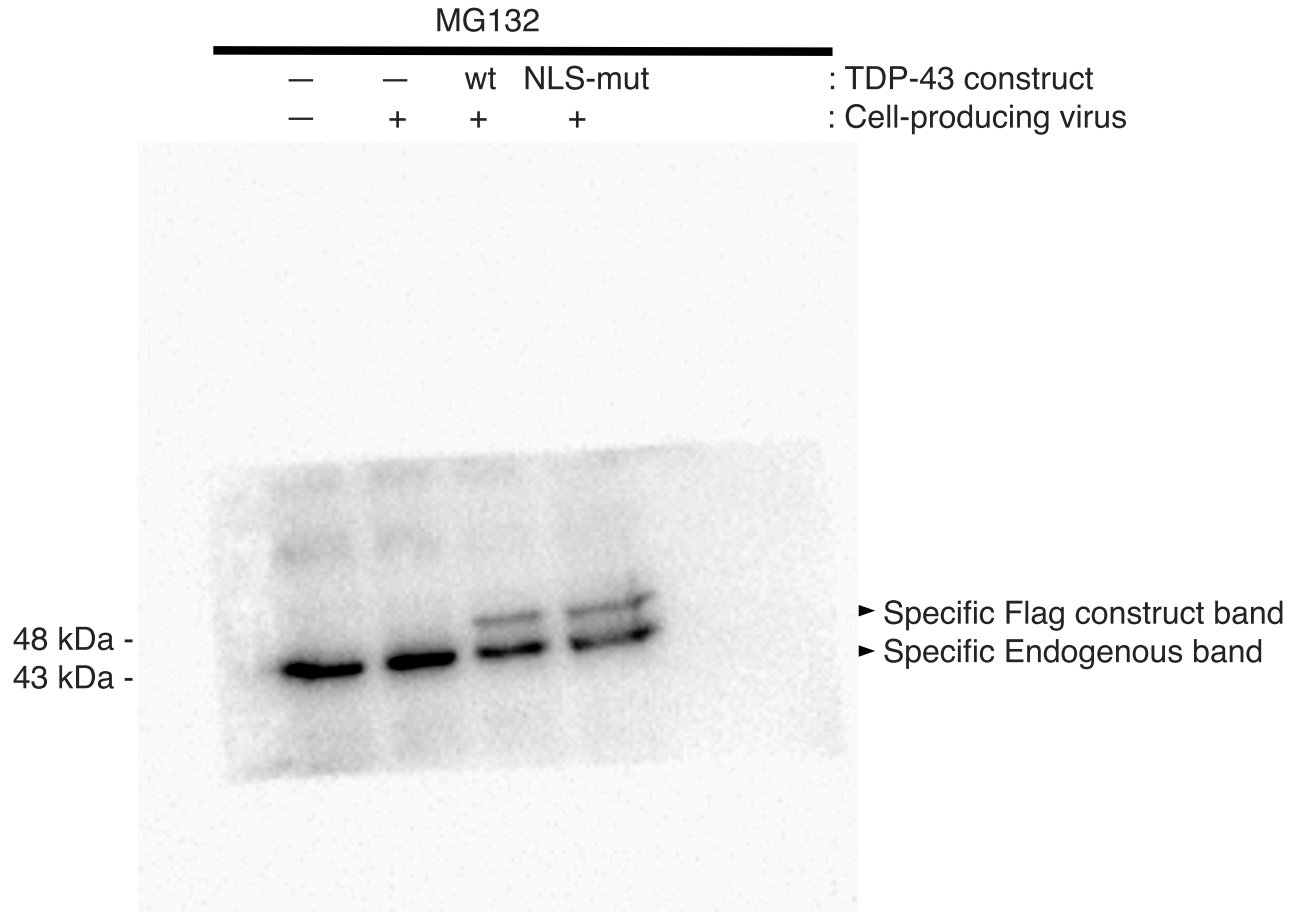



**Figure S5.** Replicate 1 Pr55<sup>Gag</sup> complete gel Western-blot associated with Figure 5A  
Cabrera-Rodríguez, R., *et al.*

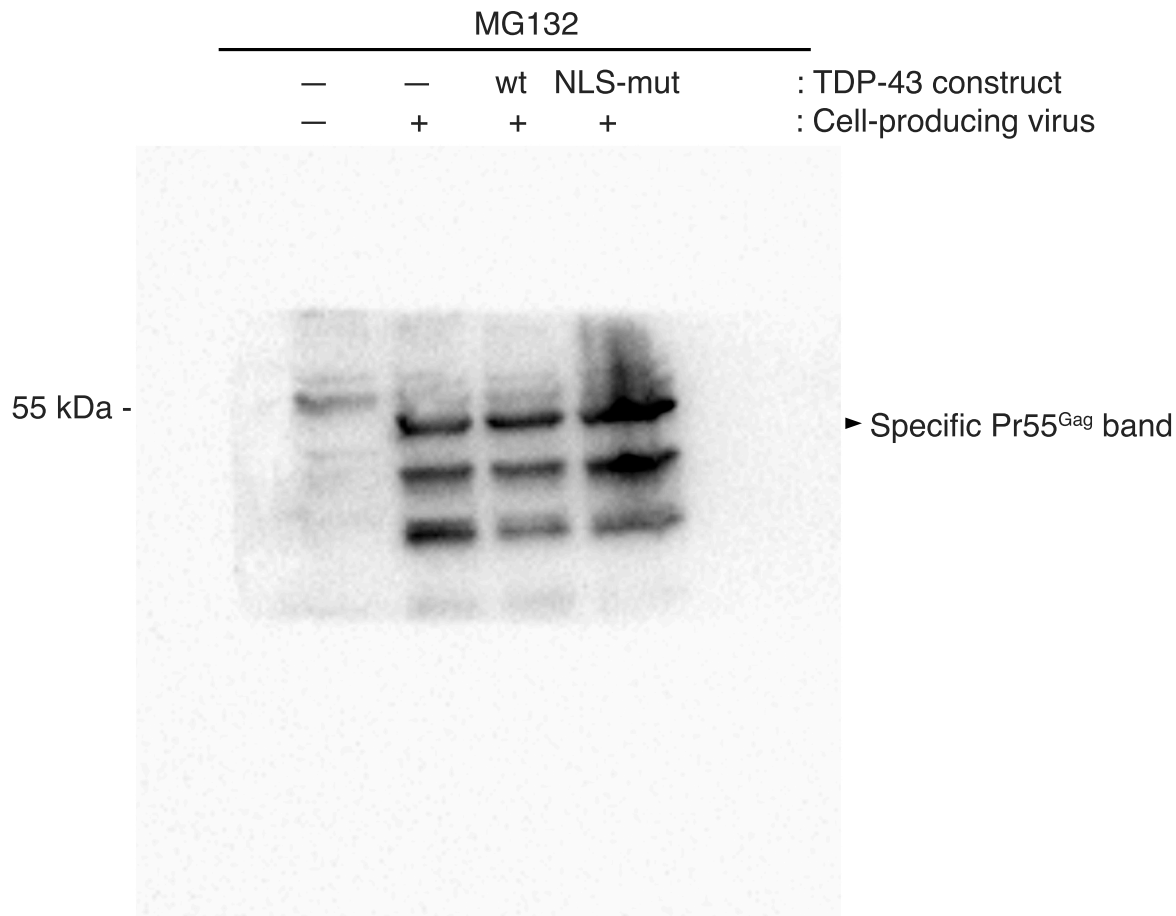

**Figure S5.** Replicate 1 Vif complete gel Western-blot associated with Figure 5A  
Cabrera-Rodríguez, R., *et al.*

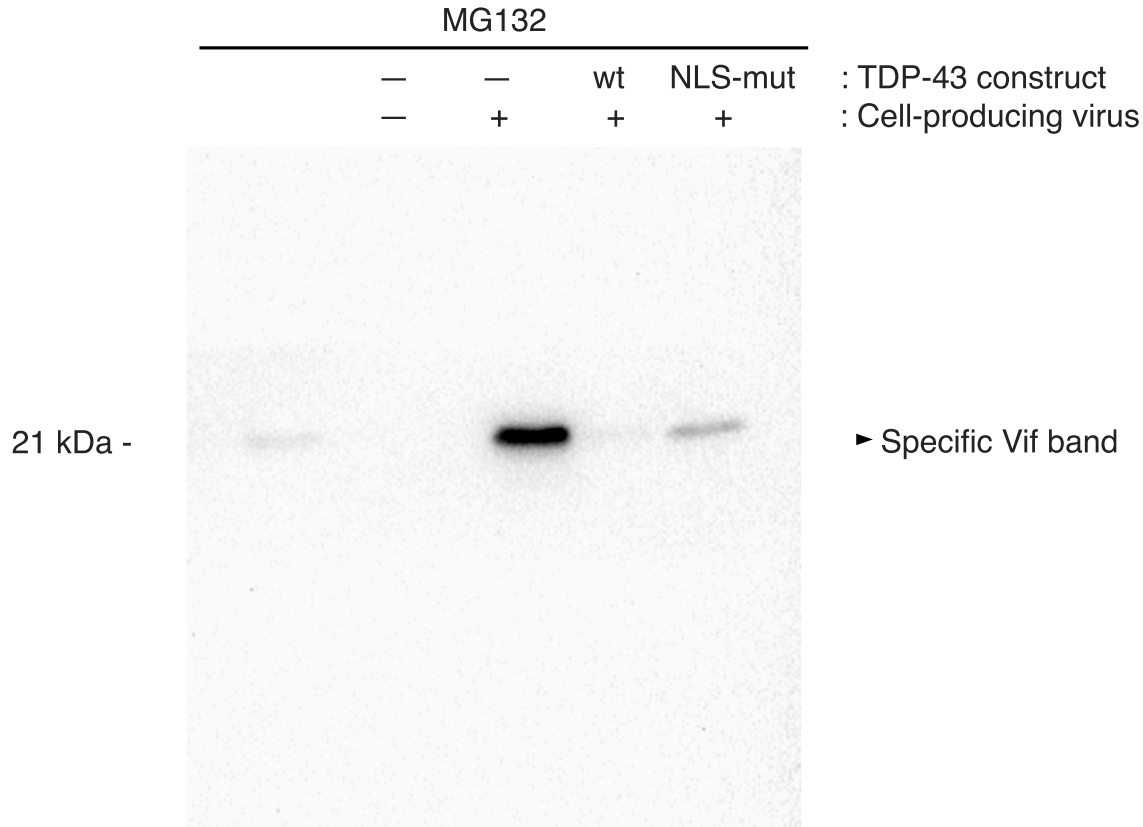

**Figure S5.** Replicate 1 Total  $\alpha$ -tubulin complete gel Western-blot associated with Figure 5A  
Cabrera-Rodríguez, R., *et al.*

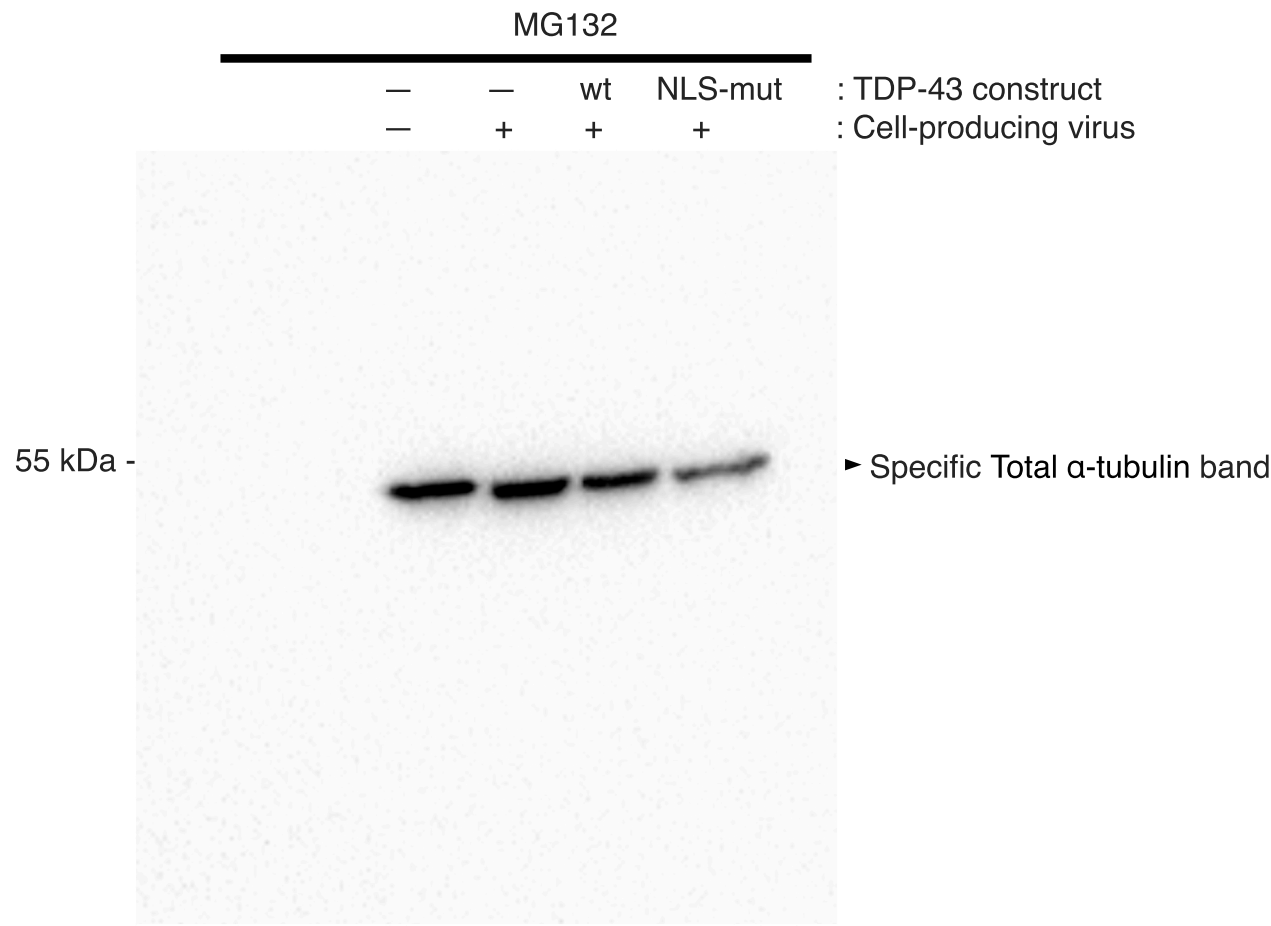

**Figure S5.** Replicate 2 HDAC6 complete gel Western-blot associated with Figure 5A  
Cabrera-Rodríguez, R., *et al.*

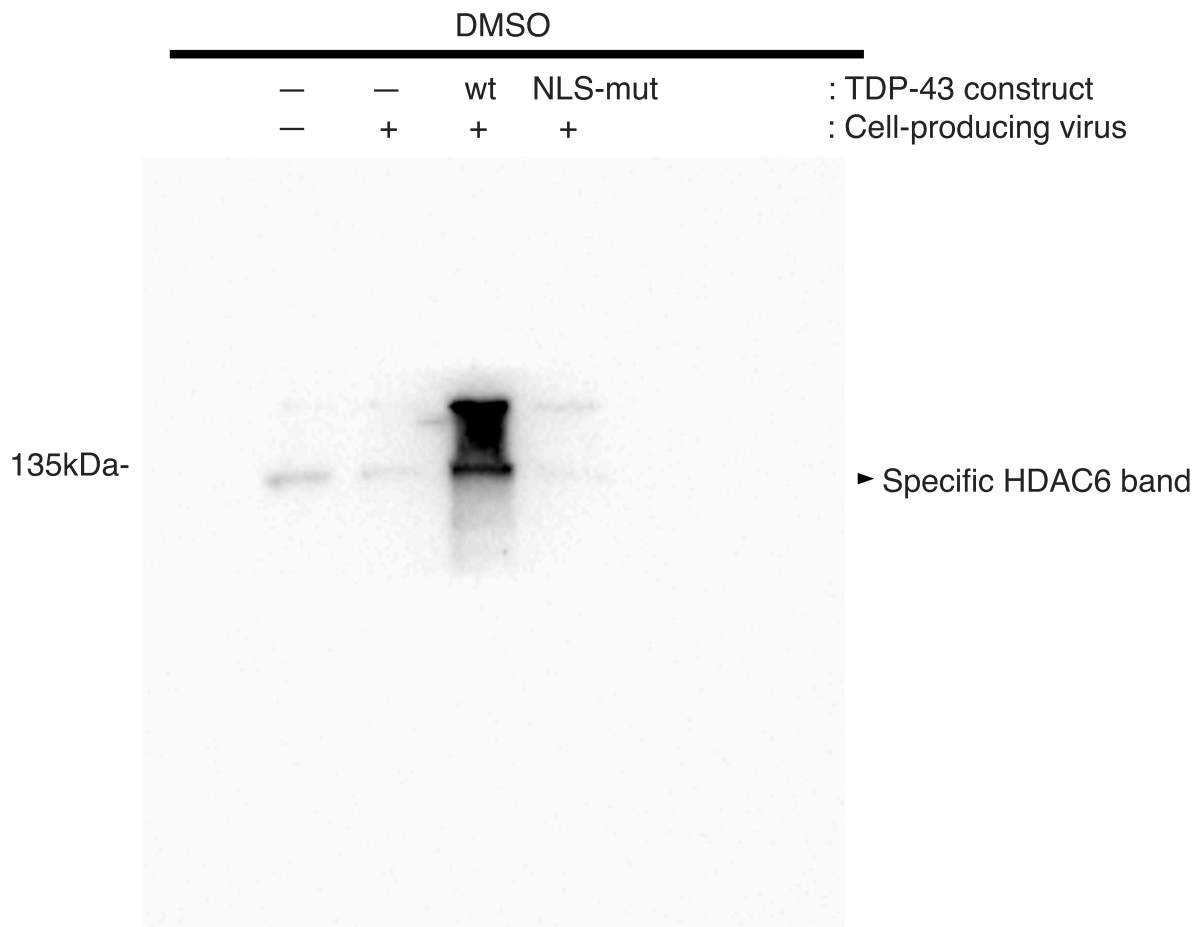

**Figure S5.** Replicate 2 p62 complete gel Western-blot associated with Figure 5A  
Cabrera-Rodríguez, R., *et al.*

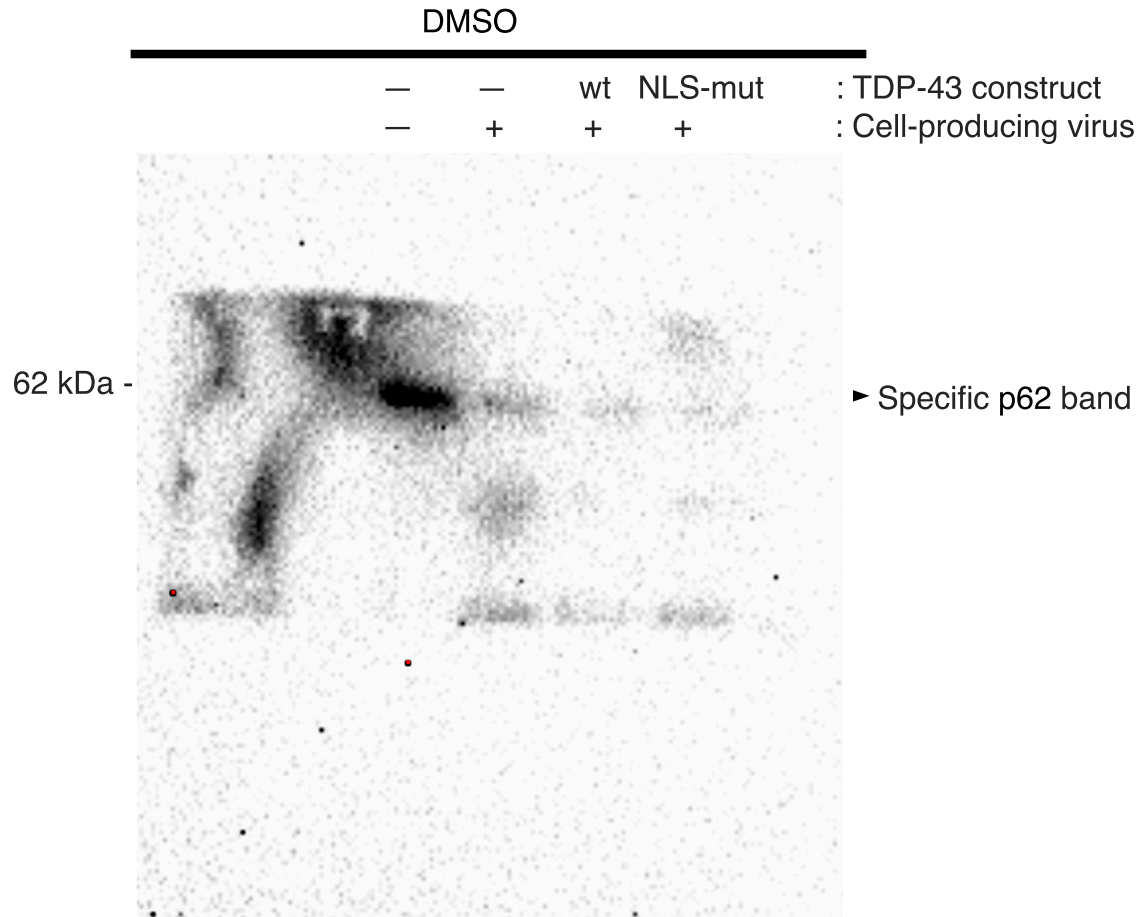

**Figure S5.** Replicate 2 TDP-43 complete gel Western-blot associated with Figure 5A  
Cabrera-Rodríguez, R., *et al.*

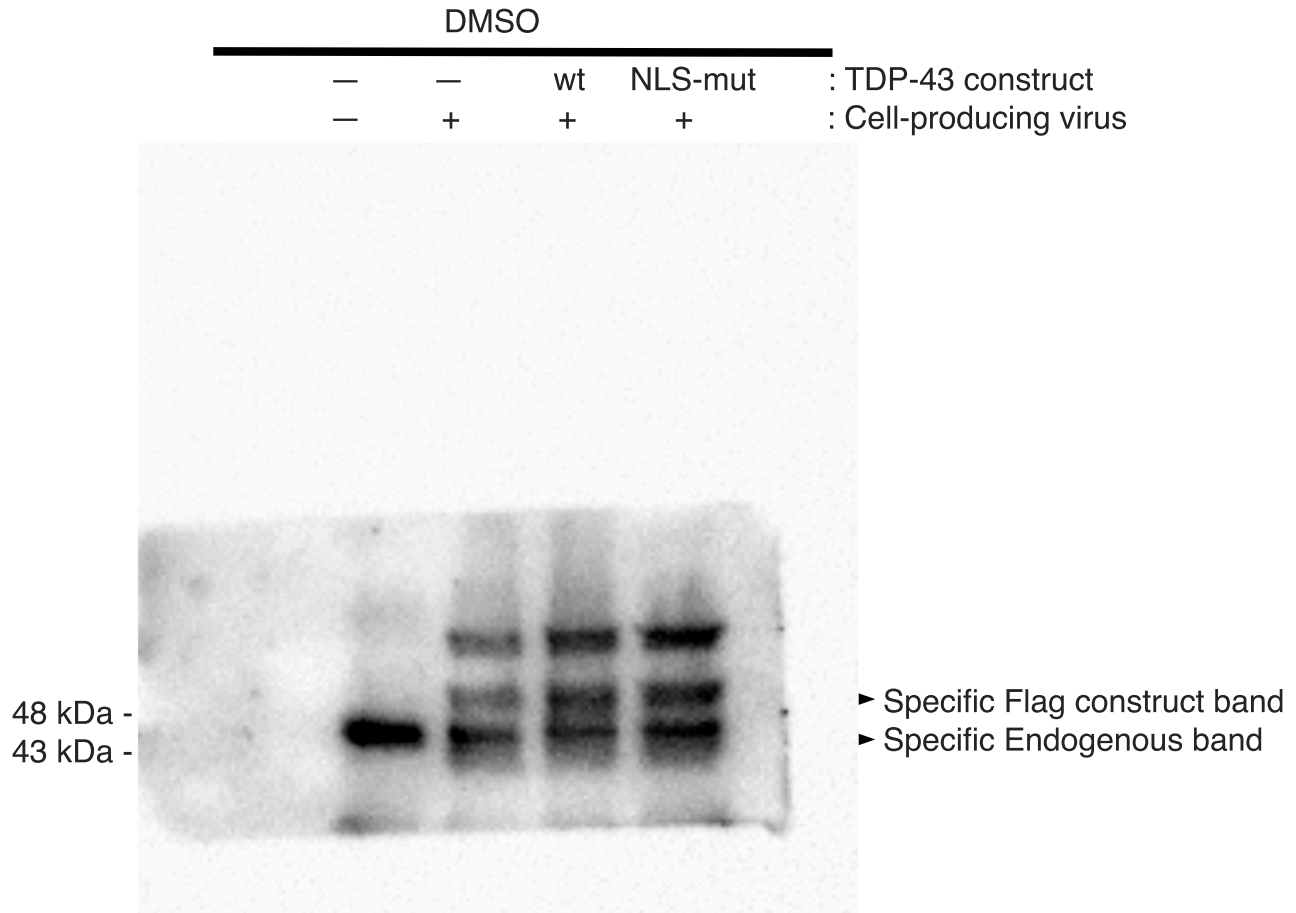

**Figure S5.** Replicate 2 Pr55<sup>Gag</sup> complete gel Western-blot associated with Figure 5A  
Cabrera-Rodríguez, R., *et al.*

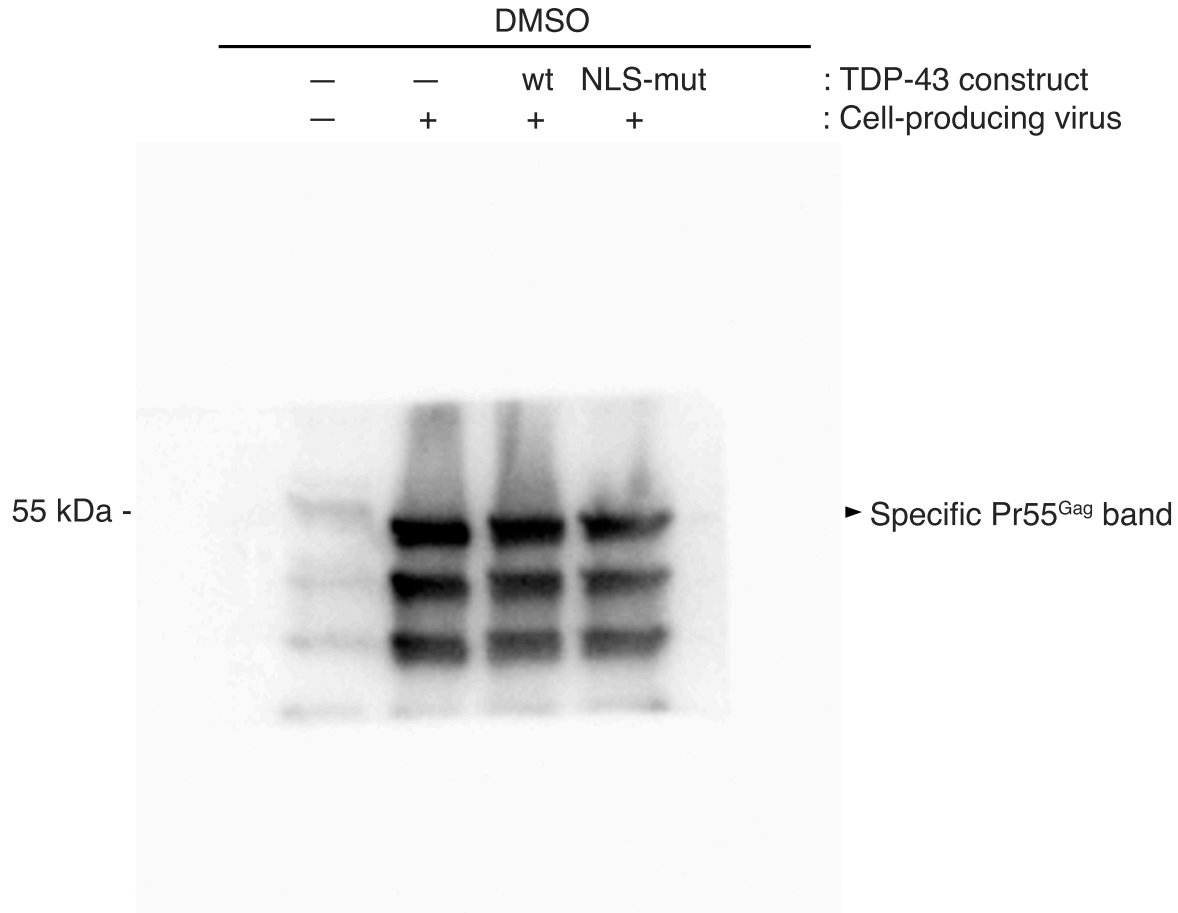

**Figure S5.** Replicate 2 Vif complete gel Western-blot associated with Figure 5A  
Cabrera-Rodríguez, R., *et al.*

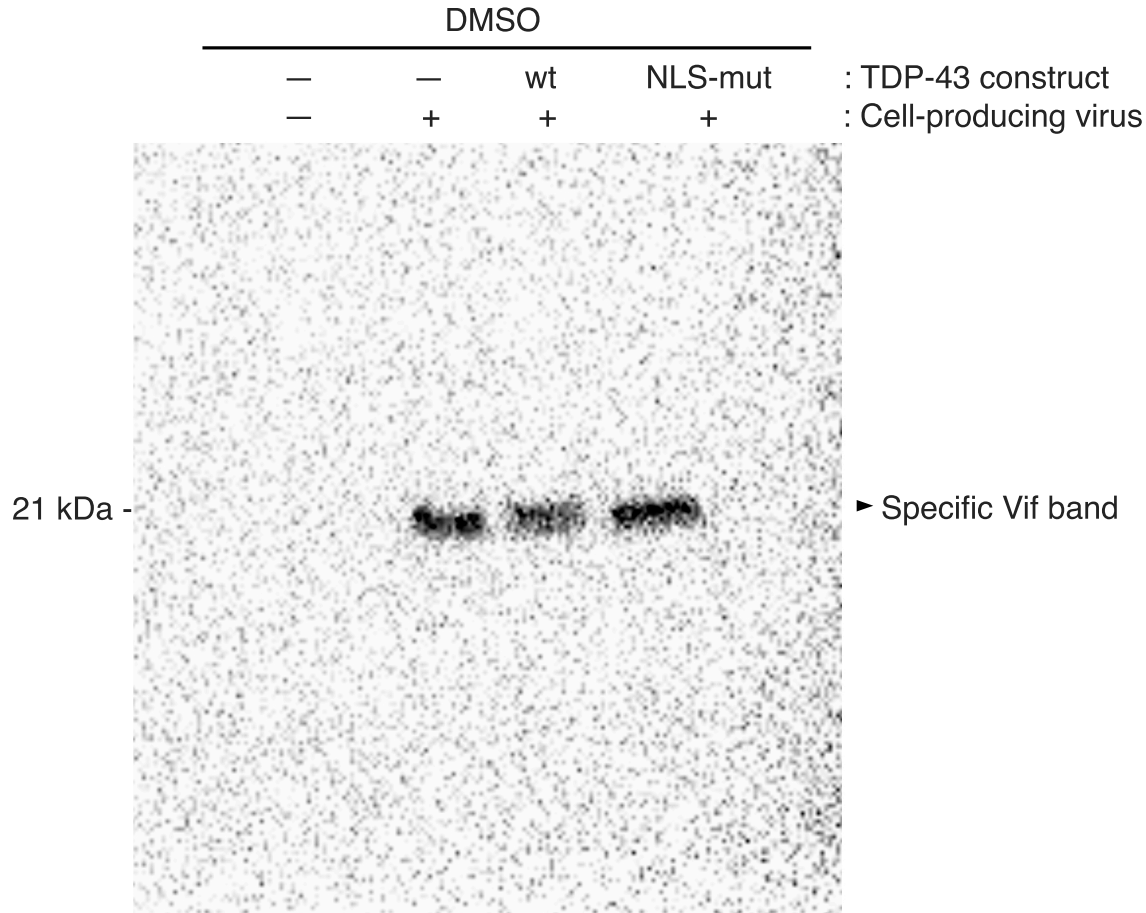



**Figure S5.** Replicate 2 Total  $\alpha$ -tubulin complete gel Western-blot associated with Figure 5A  
Cabrera-Rodríguez, R., *et al.*

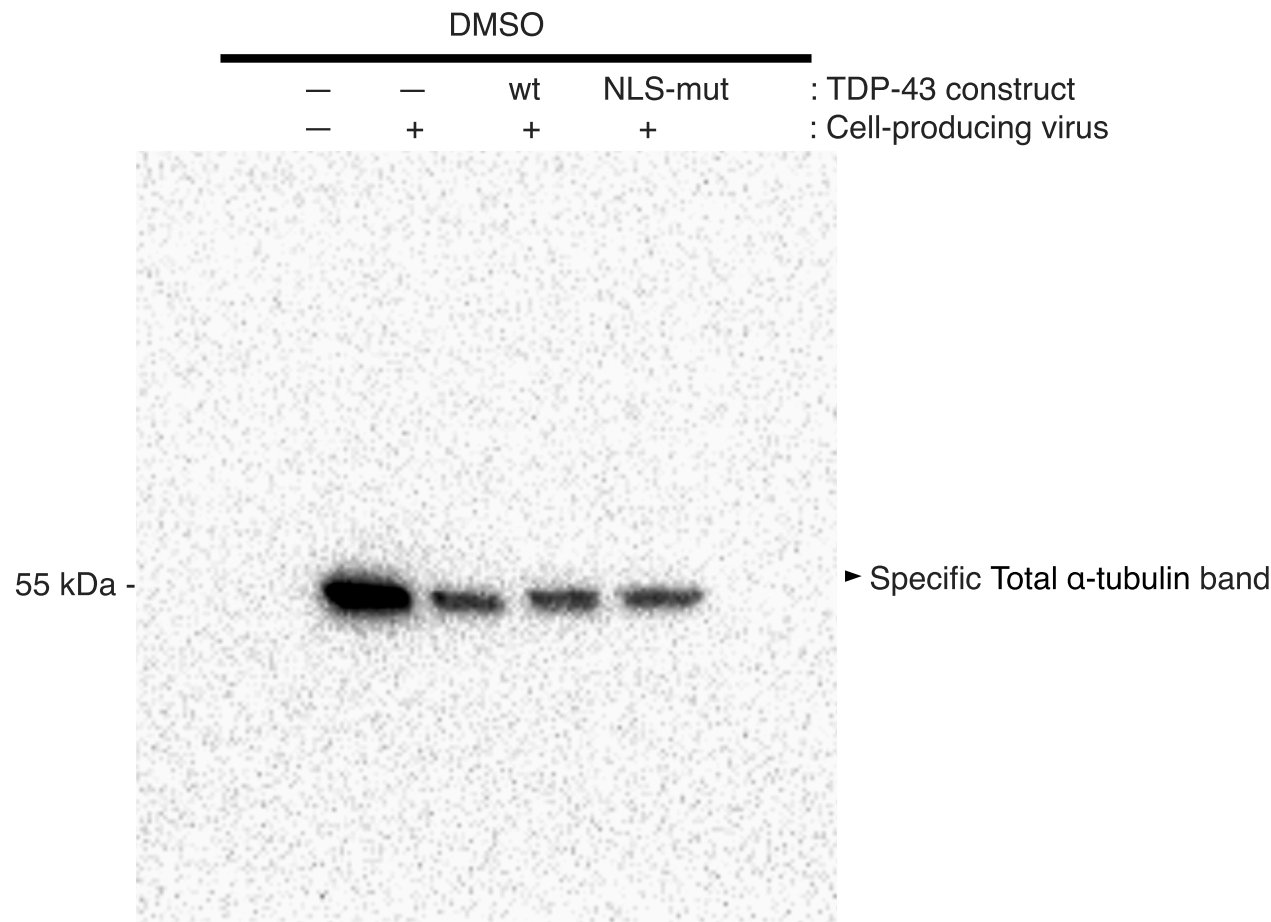

**Figure S5.** Replicate 2 HDAC6 complete gel Western-blot associated with Figure 5A  
Cabrera-Rodríguez, R., *et al.*

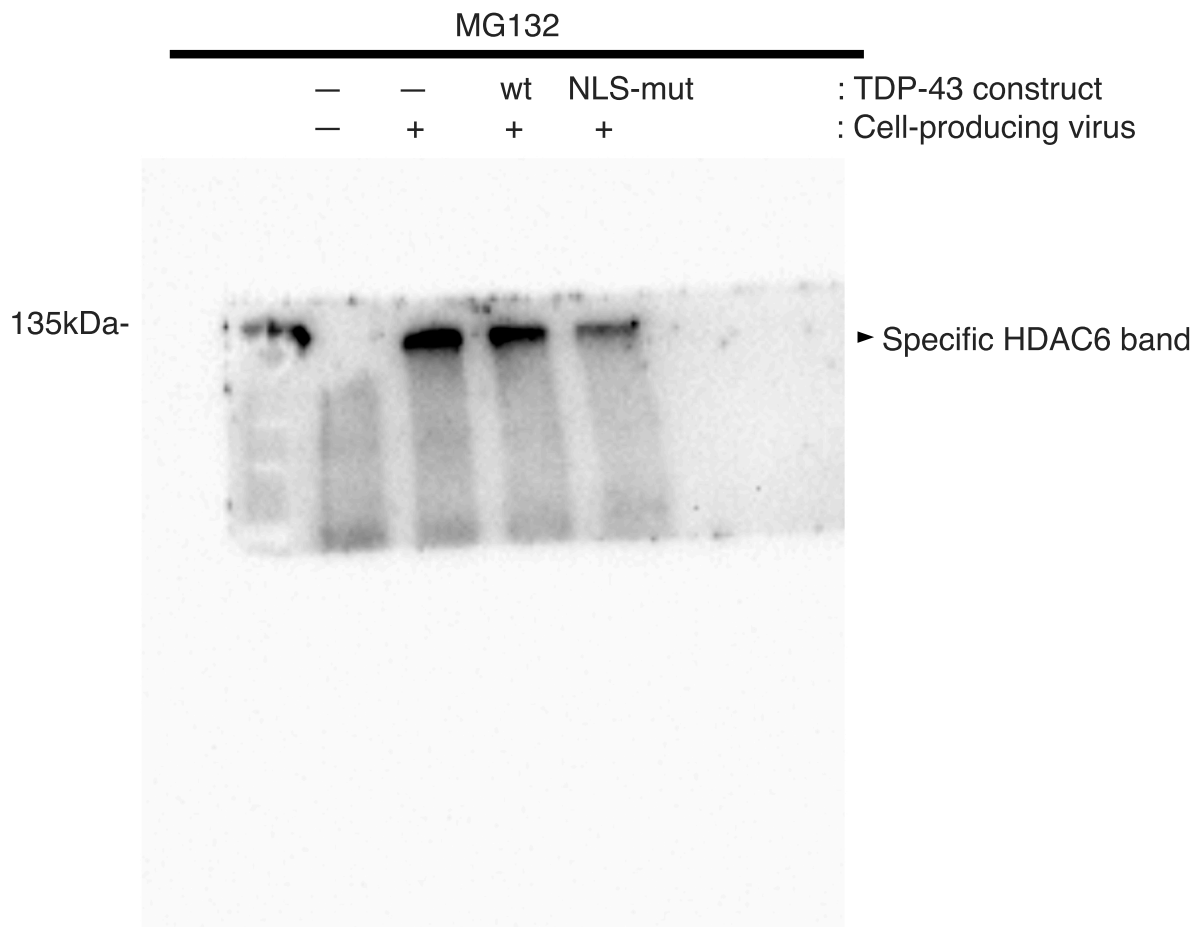

**Figure S5.** Replicate 2 p62 complete gel Western-blot associated with Figure 5A  
Cabrera-Rodríguez, R., *et al.*

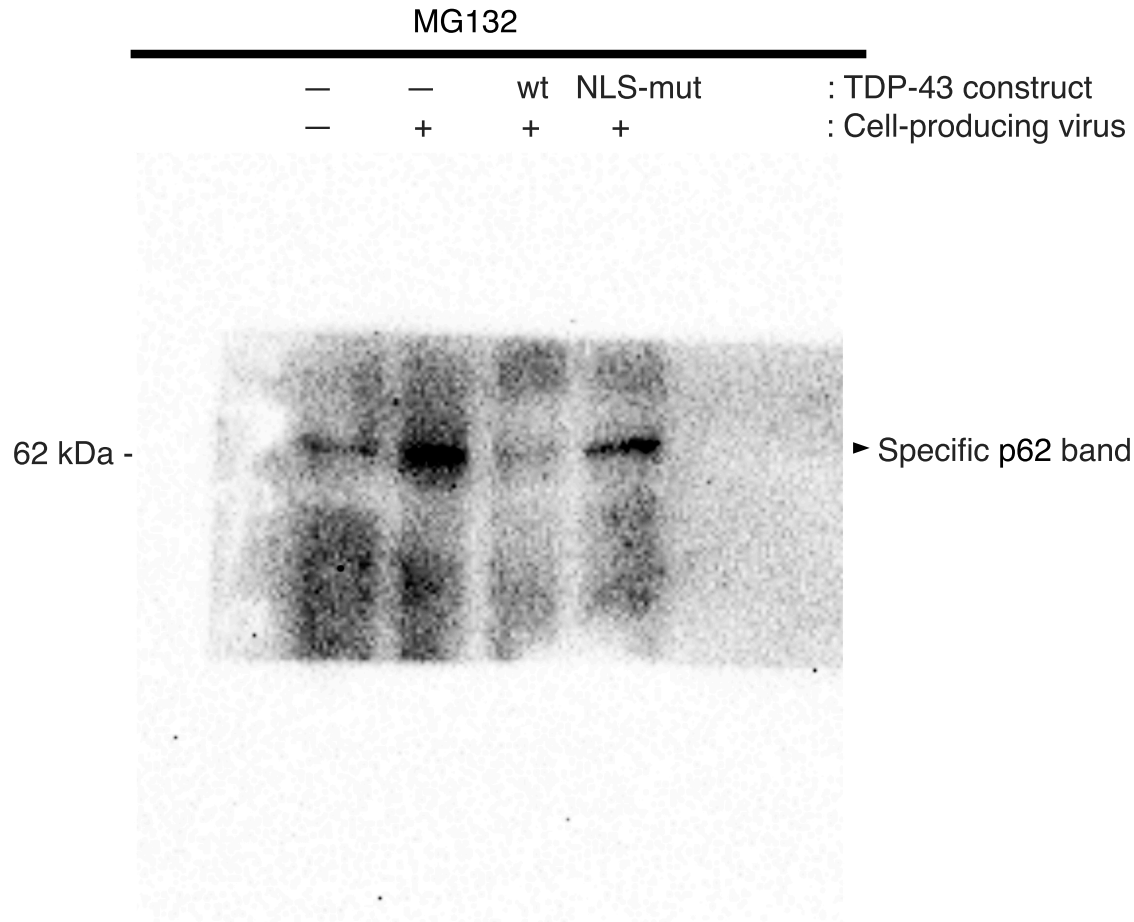

**Figure S5.** Replicate 2 TDP-43 complete gel Western-blot associated with Figure 5A  
Cabrera-Rodríguez, R., *et al.*

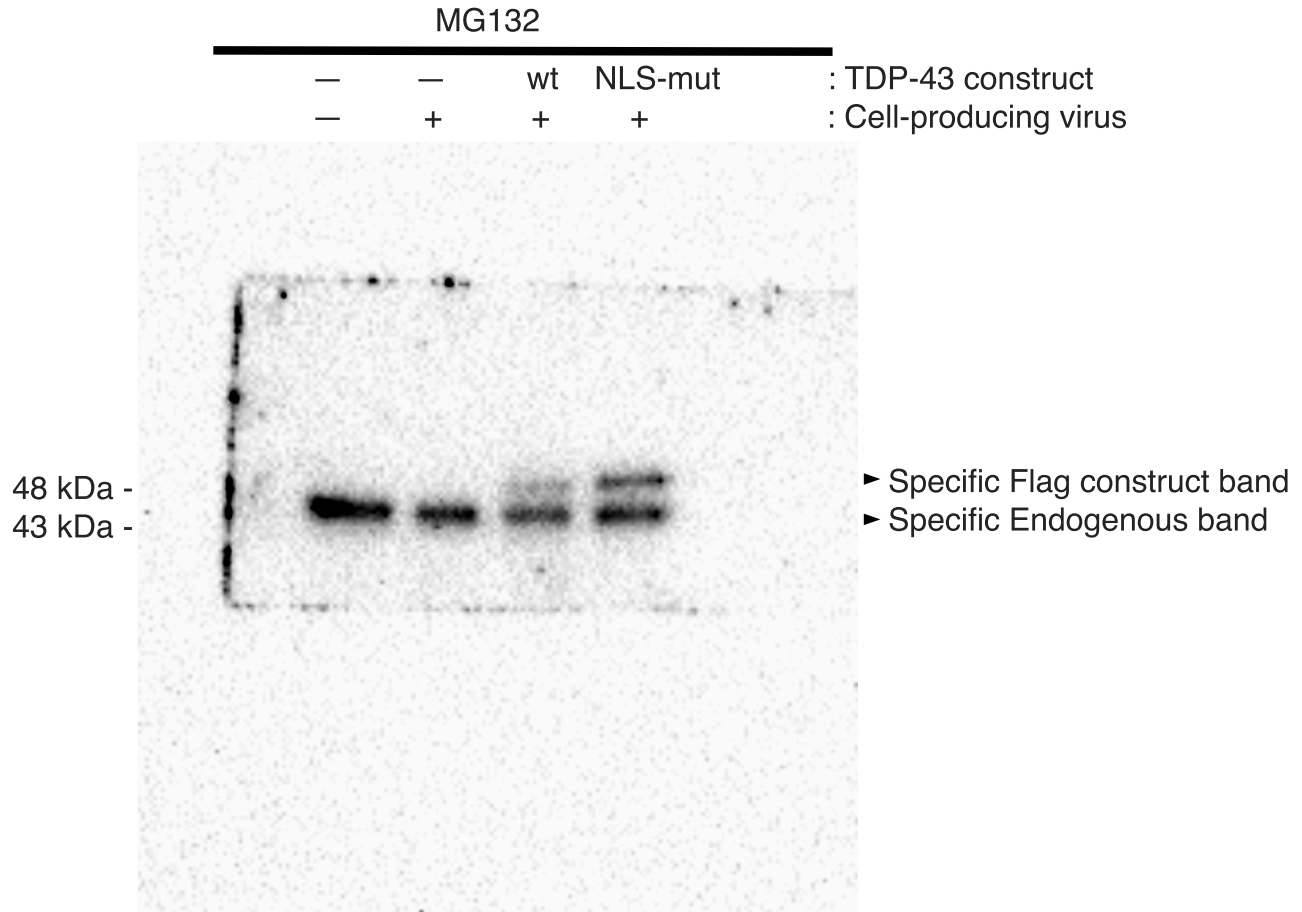

**Figure S5.** Replicate 2 Pr55<sup>Gag</sup> complete gel Western-blot associated with Figure 5A  
Cabrera-Rodríguez, R., *et al.*

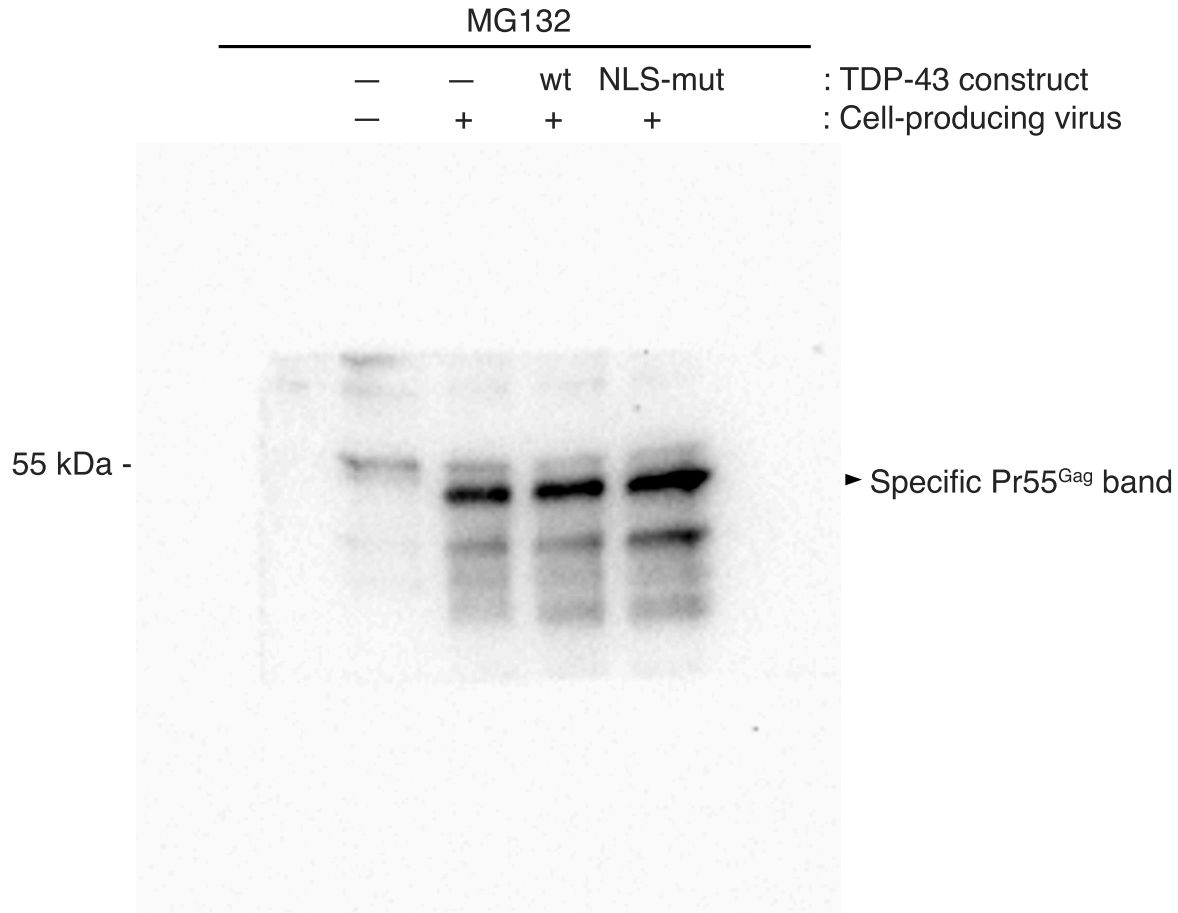

**Figure S5.** Replicate 2 Vif complete gel Western-blot associated with Figure 5A  
Cabrera-Rodríguez, R., *et al.*

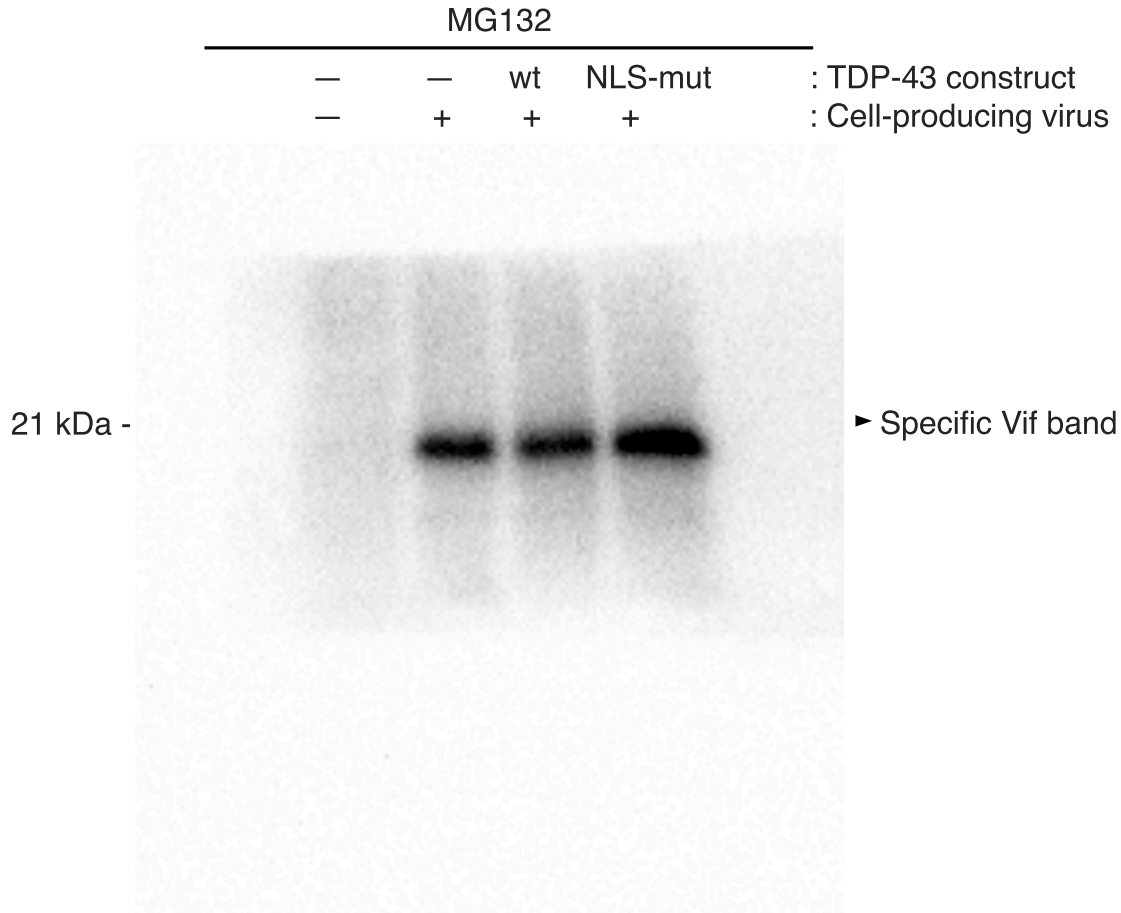

**Figure S5.** Replicate 2 Total  $\alpha$ -tubulin complete gel Western-blot associated with Figure 5A  
Cabrera-Rodríguez, R., *et al.*

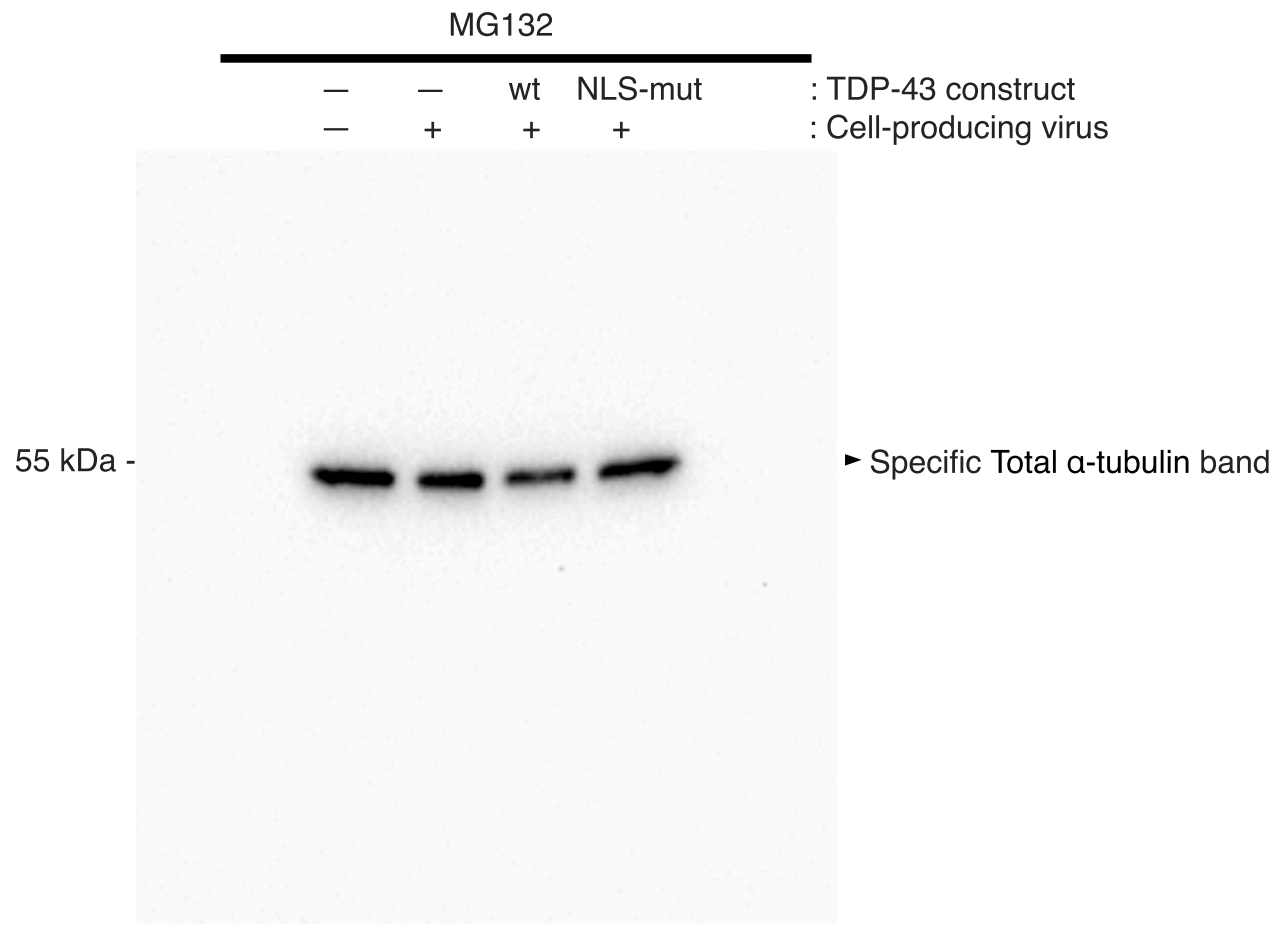

**Figure S5.** Replicate 3 HDAC6 complete gel Western-blot associated with Figure 5A  
Cabrera-Rodríguez, R., *et al.*

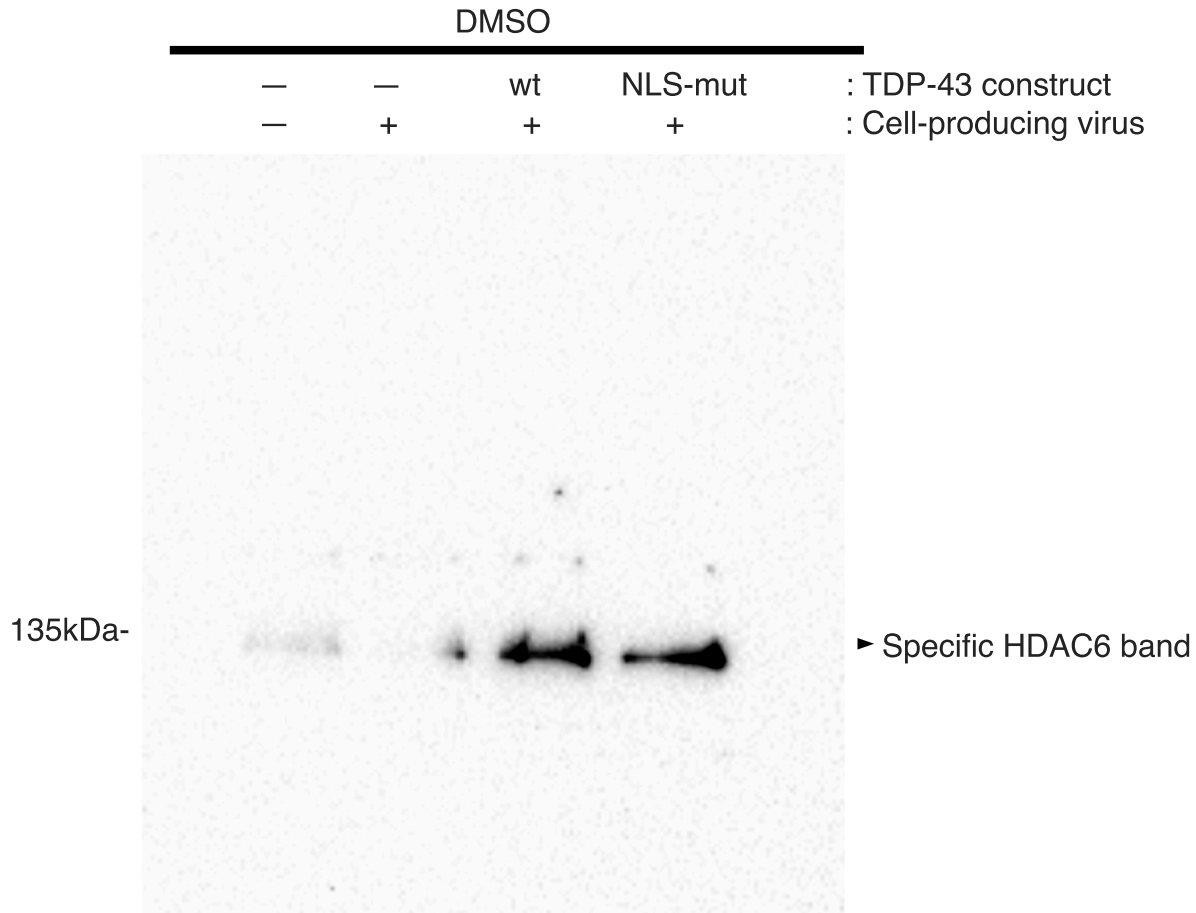



**Figure S5.** Replicate 3 p62 complete gel Western-blot associated with Figure 5A  
Cabrera-Rodríguez, R., *et al.*

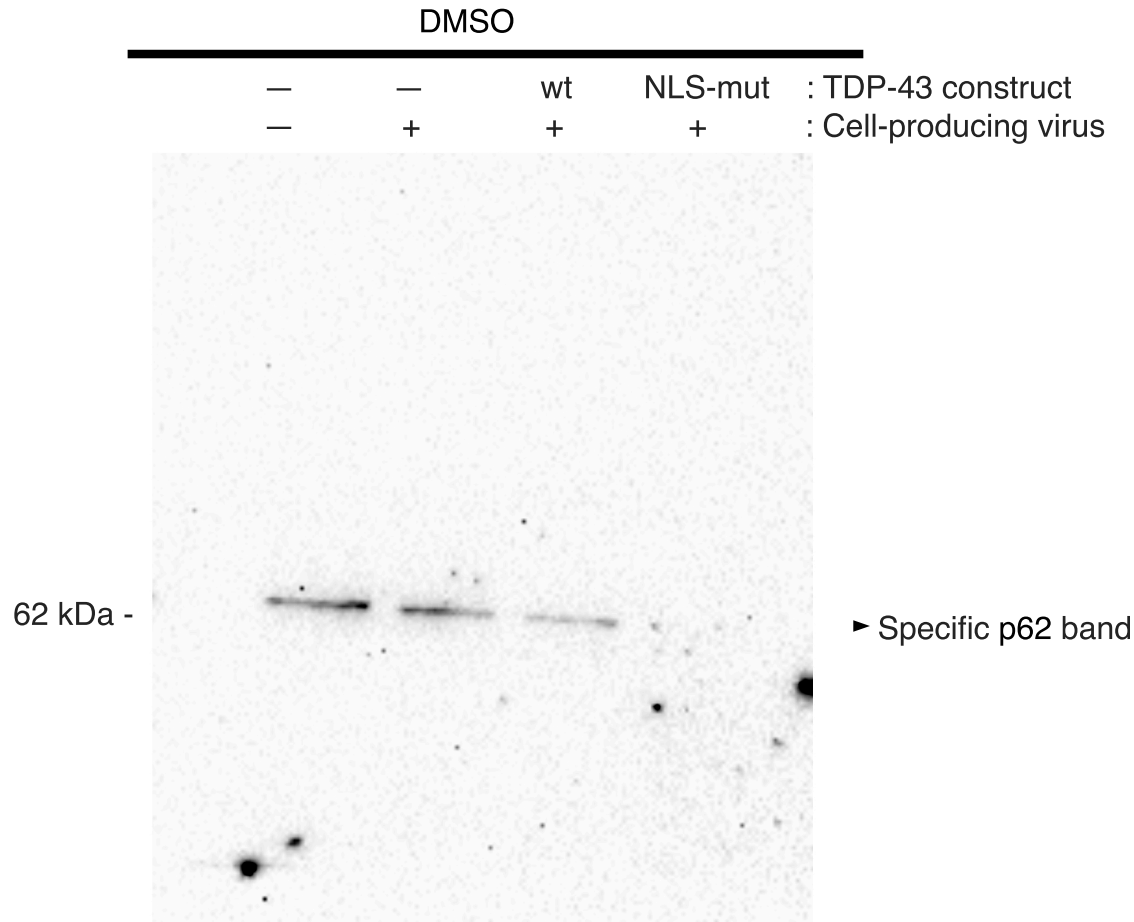

**Figure S5.** Replicate 3 TDP-43 complete gel Western-blot associated with Figure 5A  
Cabrera-Rodríguez, R., *et al.*

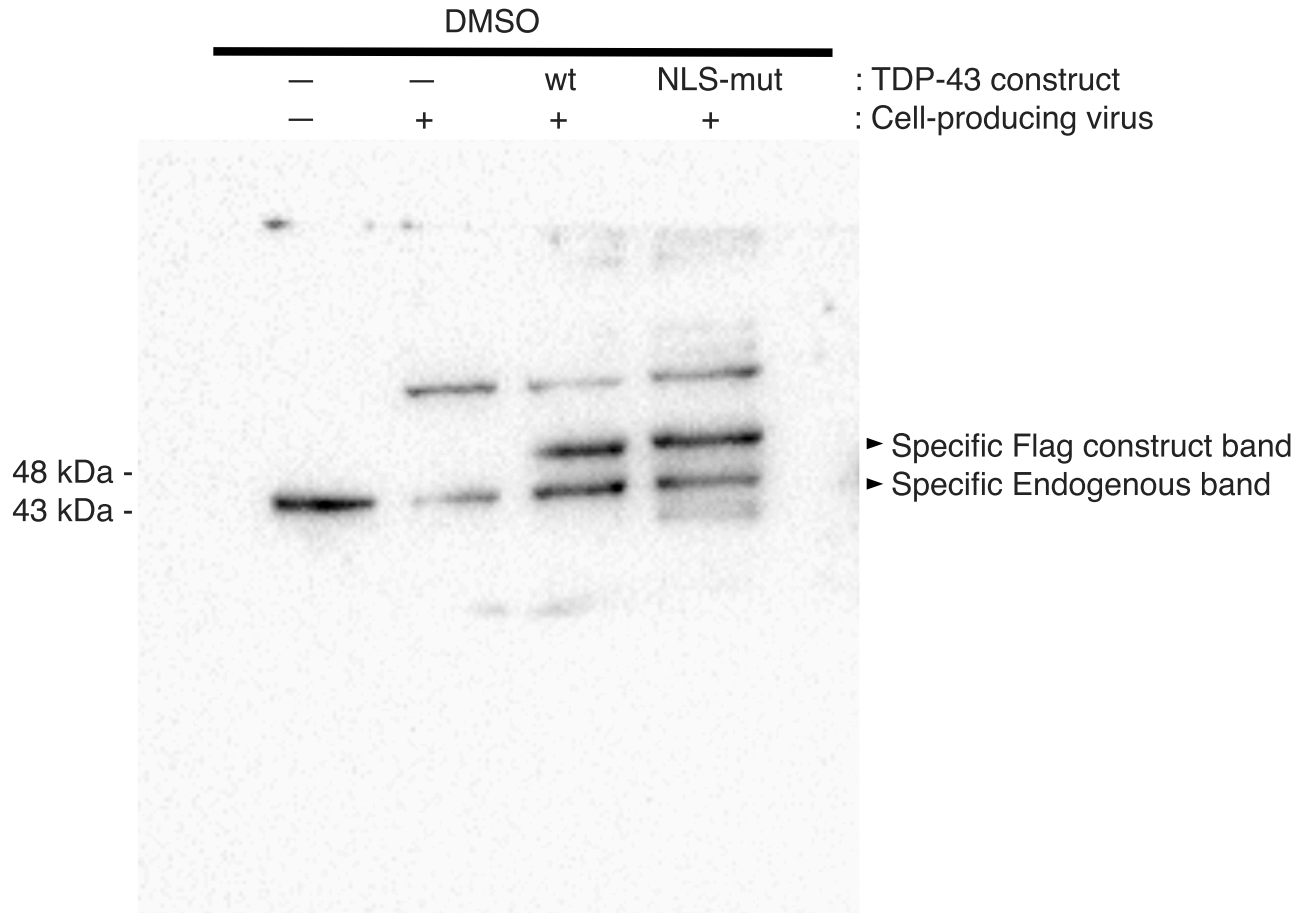

**Figure S5.** Replicate 3 Pr55<sup>Gag</sup> complete gel Western-blot associated with Figure 5A  
Cabrera-Rodríguez, R., *et al.*

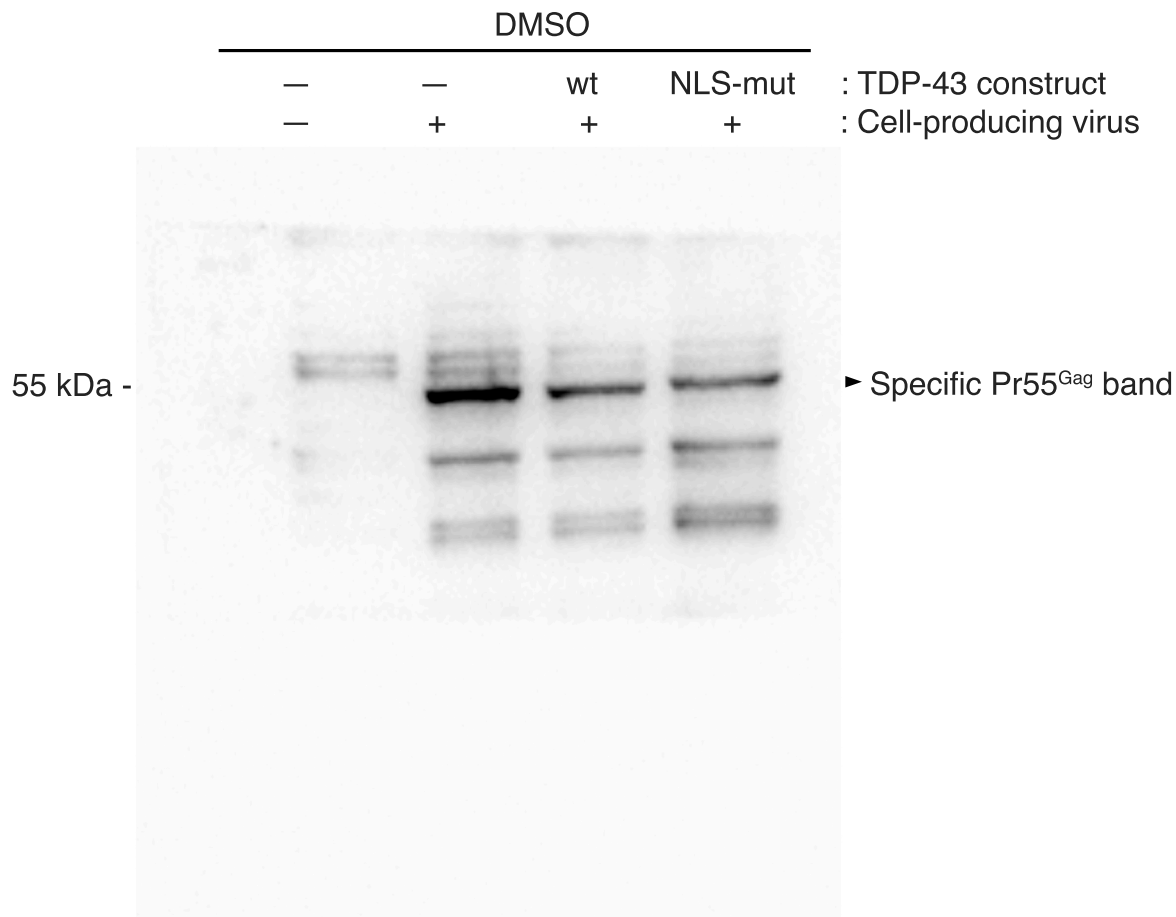

**Figure S5.** Replicate 3 Vif complete gel Western-blot associated with Figure 5A  
Cabrera-Rodríguez, R., *et al.*

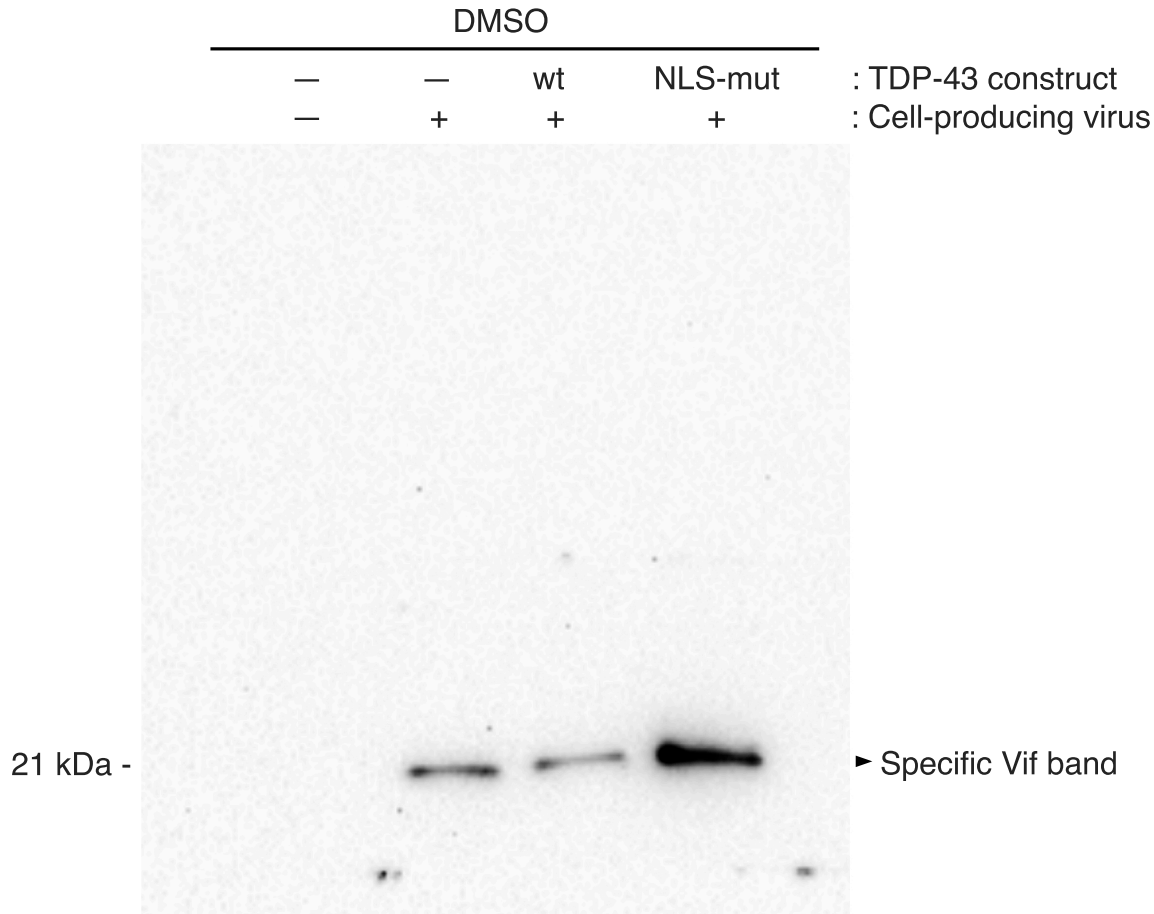

**Figure S5.** Replicate 3 Total  $\alpha$ -tubulin complete gel Western-blot associated with Figure 5A  
Cabrera-Rodríguez, R., *et al.*

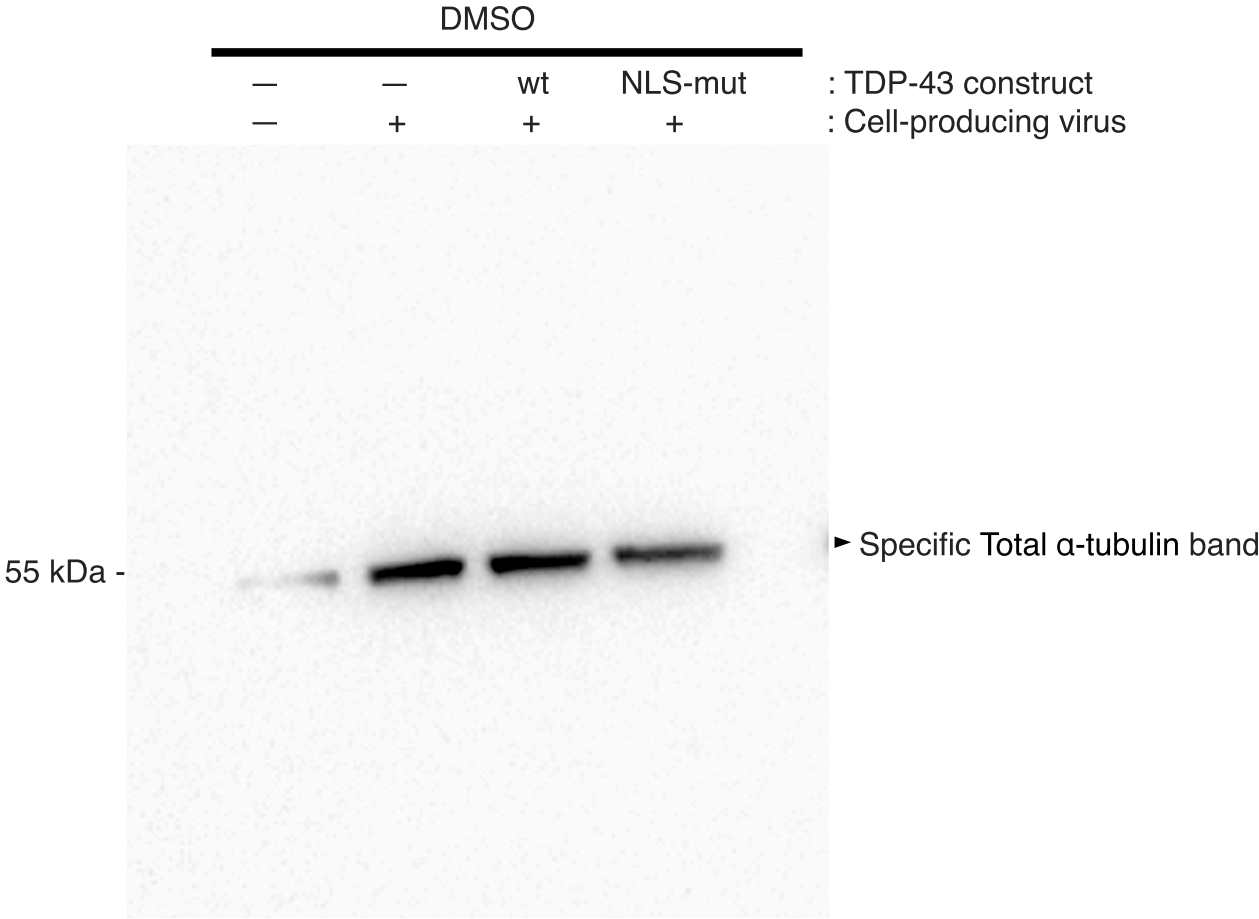

**Figure S5.** Replicate 3 HDAC6 complete gel Western-blot associated with Figure 5A  
Cabrera-Rodríguez, R., *et al.*

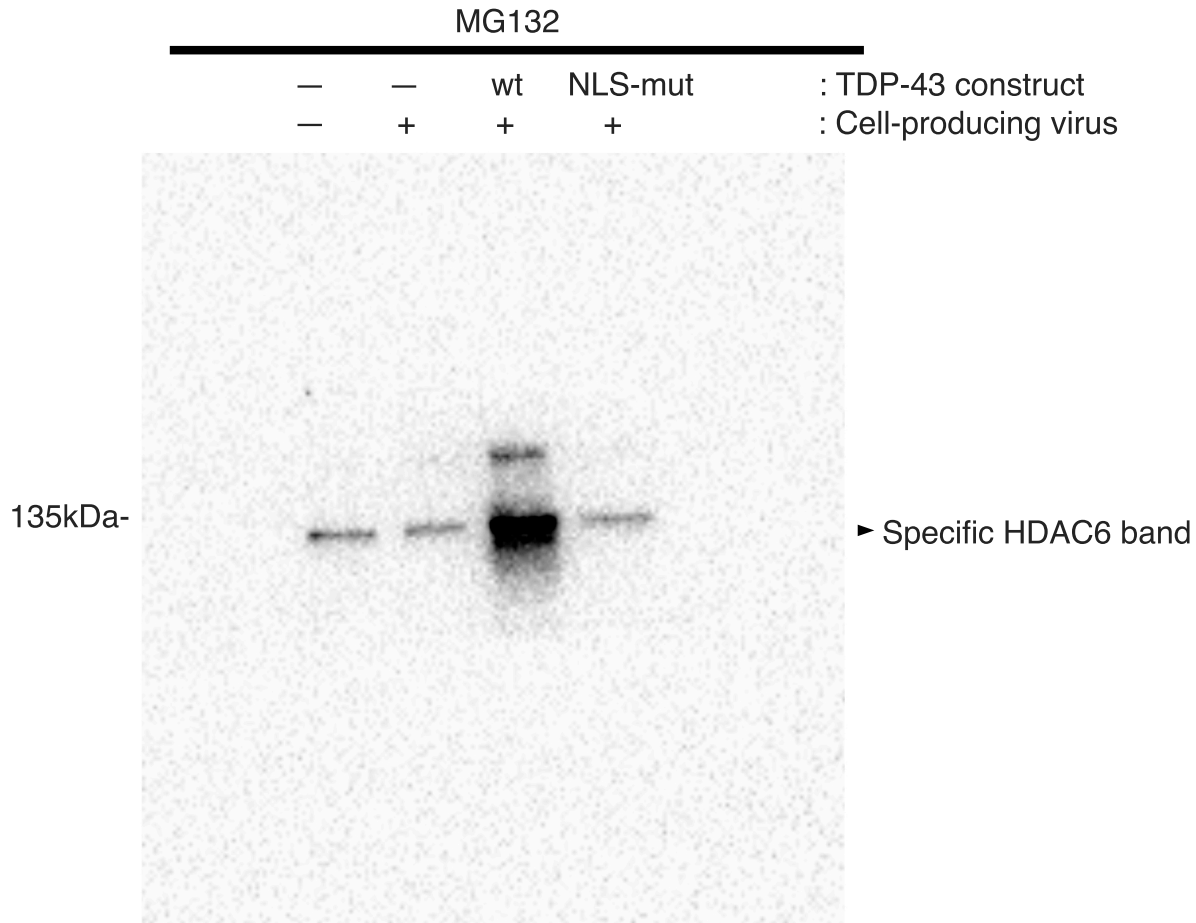

**Figure S5.** Replicate 3 p62 complete gel Western-blot associated with Figure 5A  
Cabrera-Rodríguez, R., *et al.*

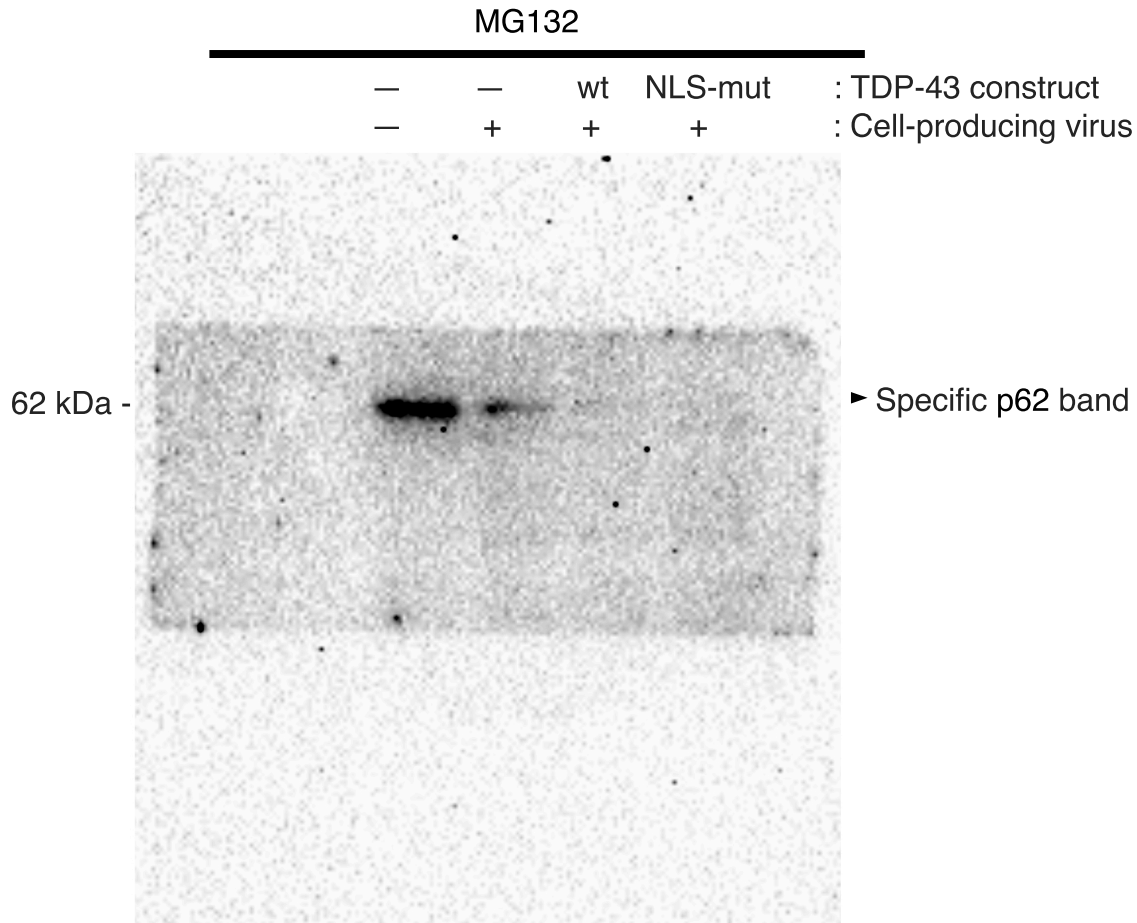

**Figure S5.** Replicate 3 TDP-43 complete gel Western-blot associated with Figure 5A  
Cabrera-Rodríguez, R., *et al.*

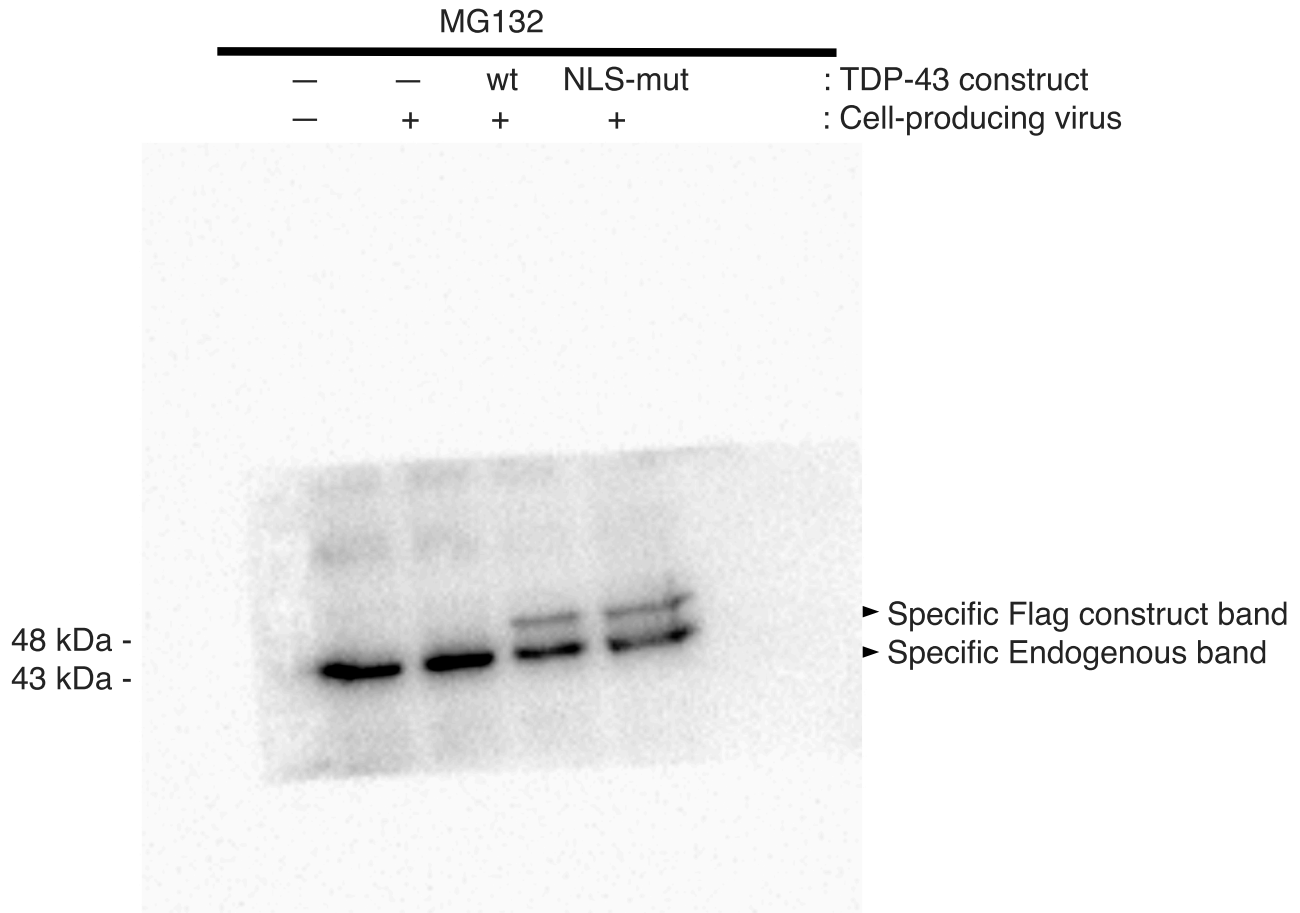



**Figure S5.** Replicate 3 Pr55<sup>Gag</sup> complete gel Western-blot associated with Figure 5A  
Cabrera-Rodríguez, R., *et al.*

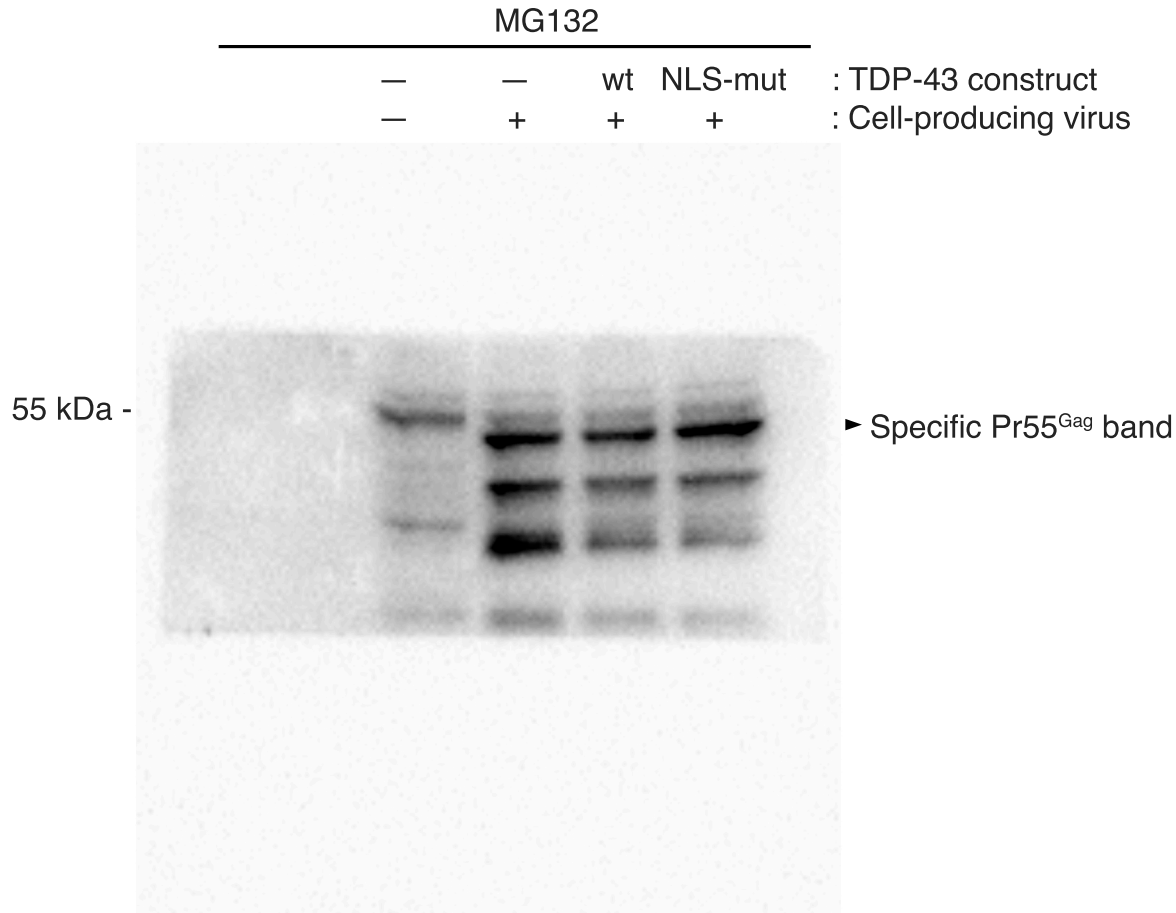

**Figure S5.** Replicate 3 Vif complete gel Western-blot associated with Figure 5A  
Cabrera-Rodríguez, R., *et al.*

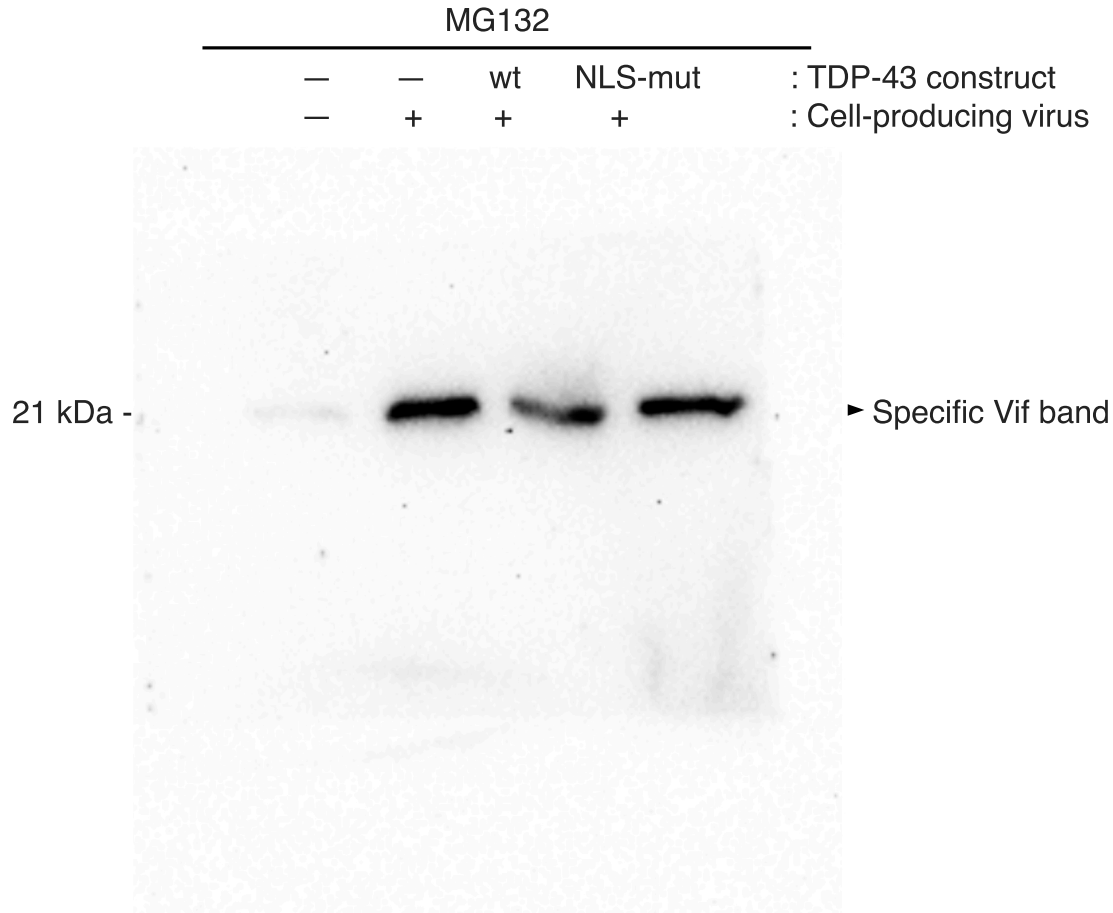

**Figure S5.** Replicate 3 Total  $\alpha$ -tubulin complete gel Western-blot associated with Figure 5A  
Cabrera-Rodríguez, R., *et al.*

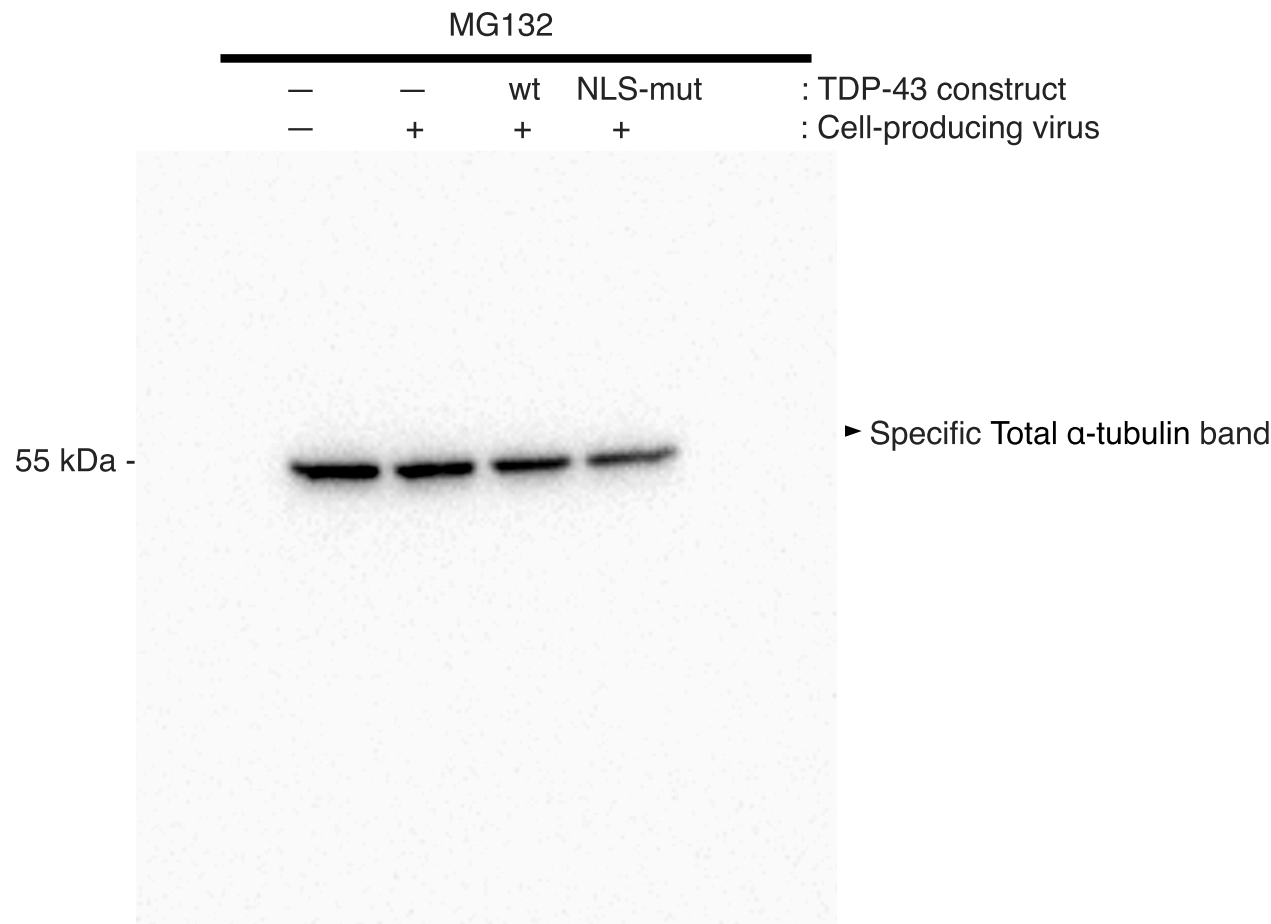

Replicate 1 as figure format

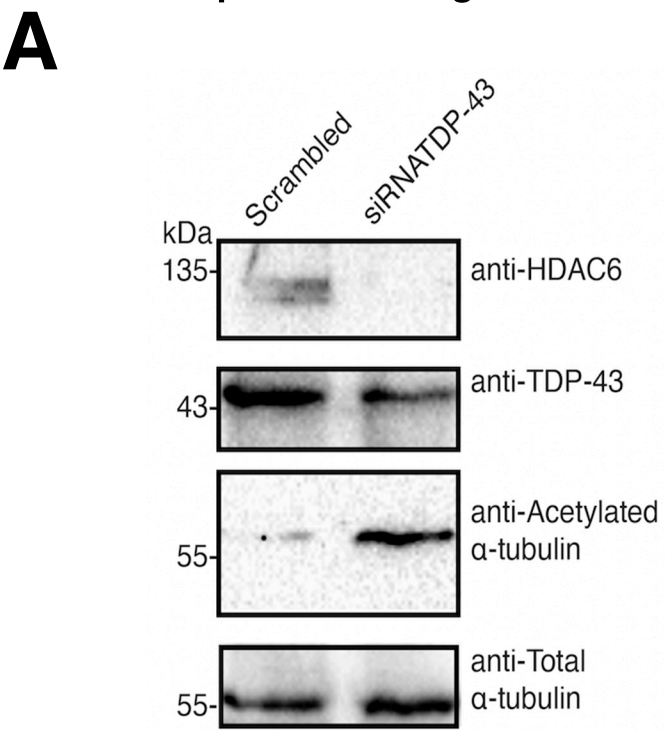

Replicate 2 as figure format

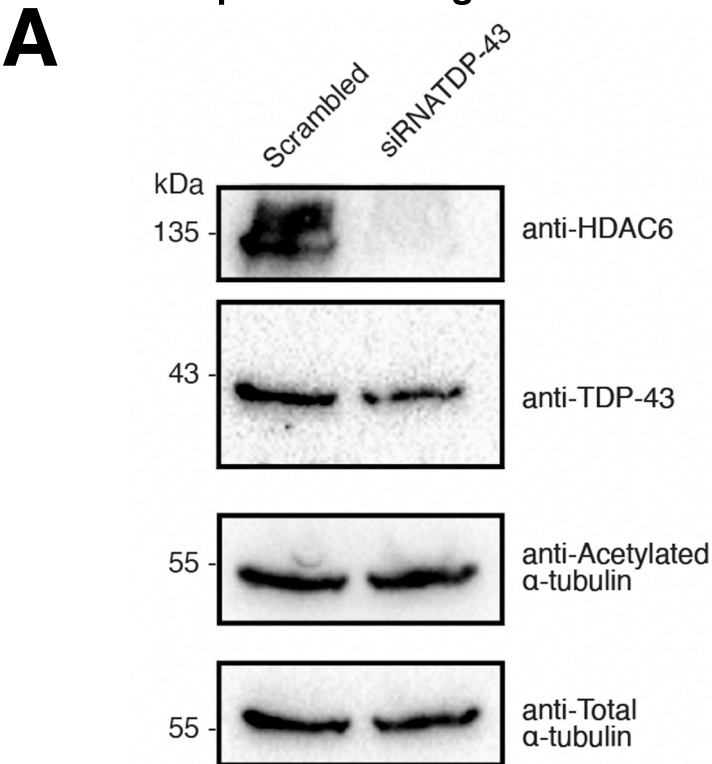

Replicate 3 as figure format

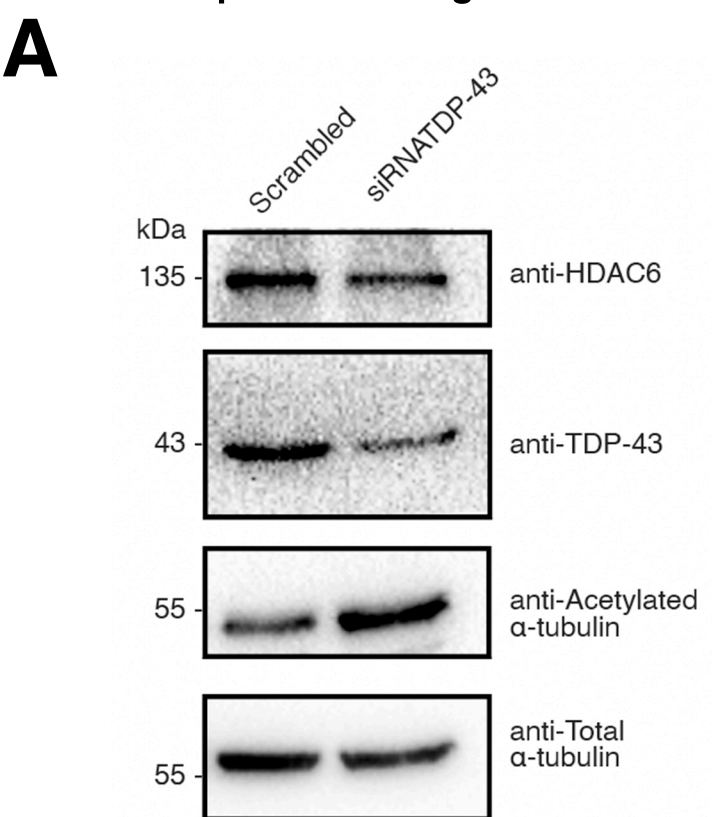

**Figure S6.** Replicate 1 HDAC6 complete gel Western-blot associated with Figure 6A  
Cabrera-Rodríguez, R., *et al.*

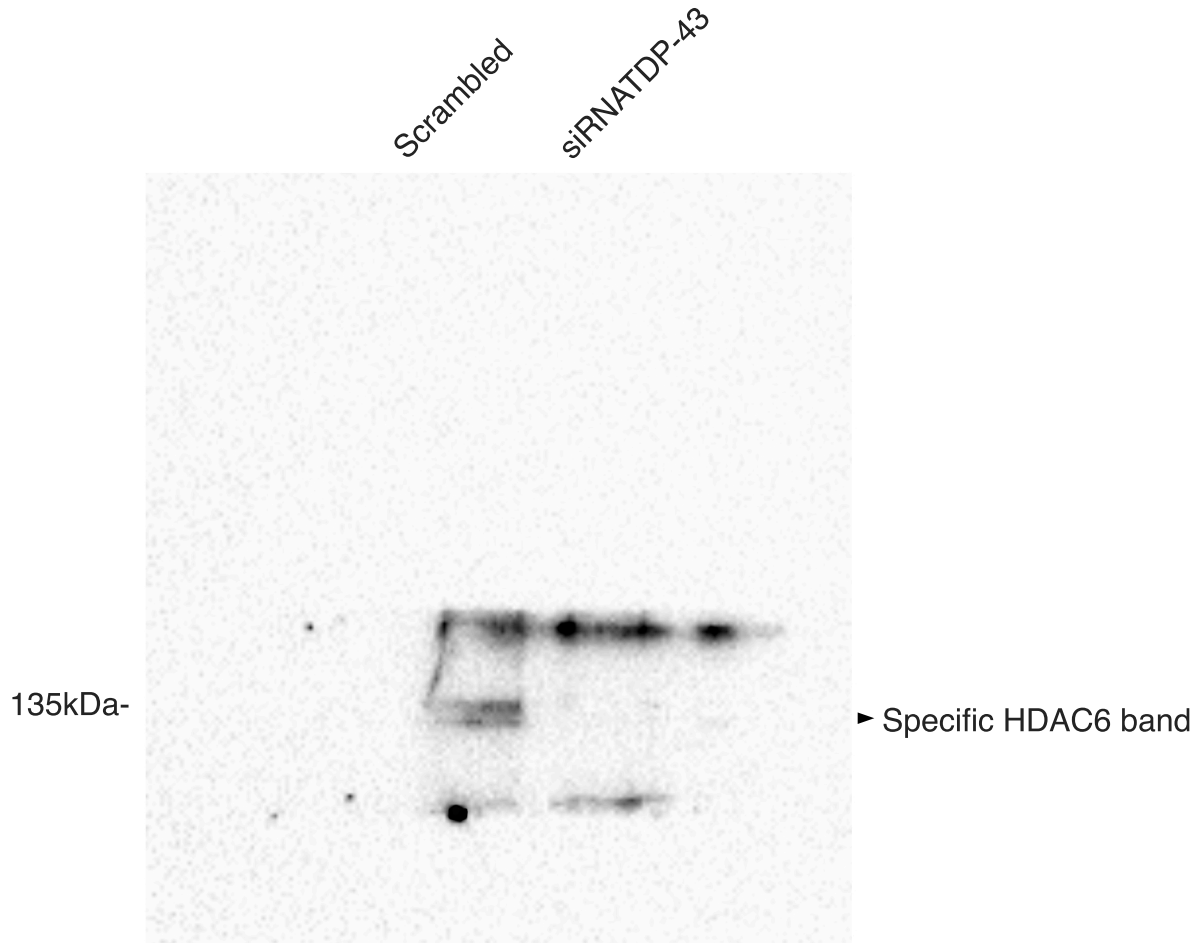

**Figure S6.** Replicate 1 TDP-43 complete gel Western-blot associated with Figure 6A  
Cabrera-Rodríguez, R., *et al.*

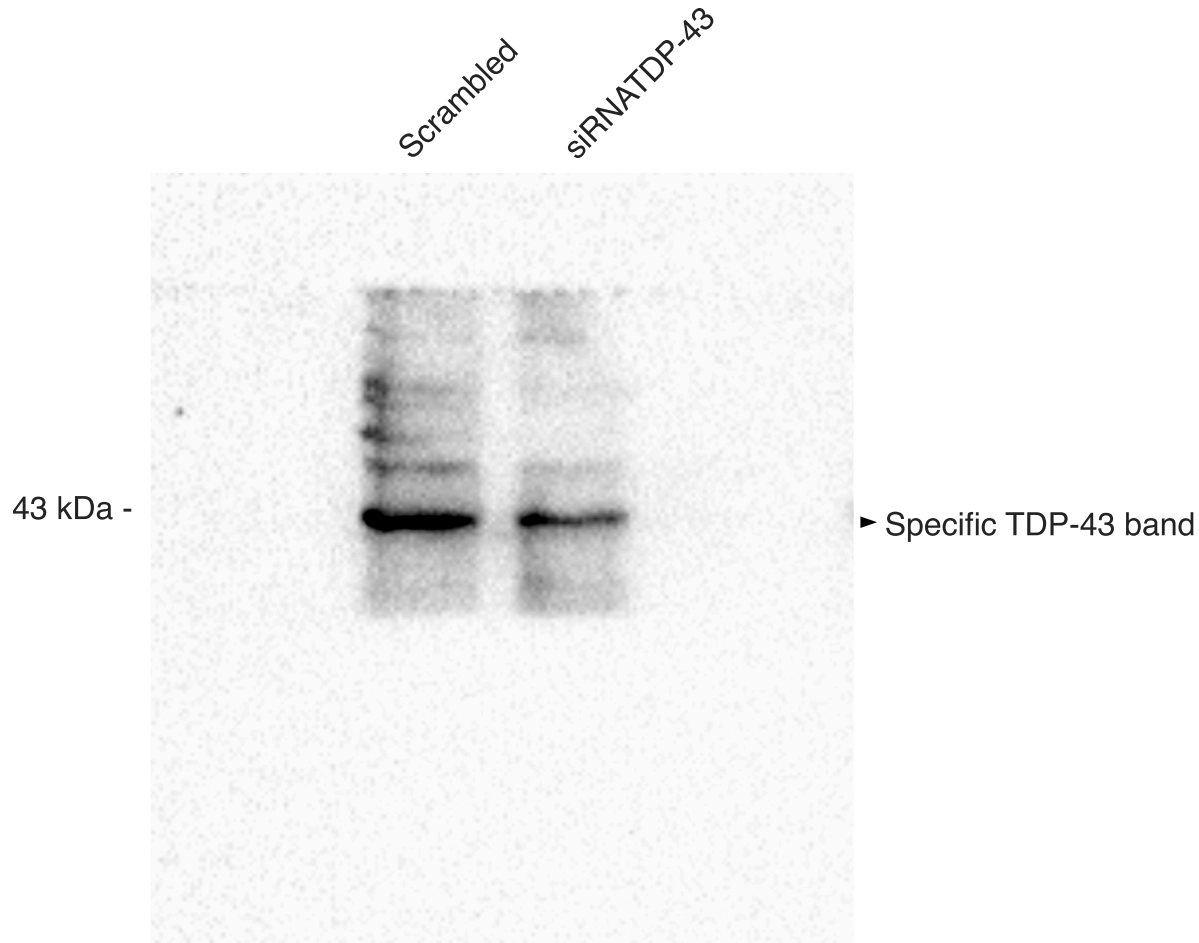

**Figure S6.** Replicate 1 Acetylated  $\alpha$ -tubulin complete gel Western-blot associated with Figure 6A  
Cabrera-Rodríguez, R., *et al.*

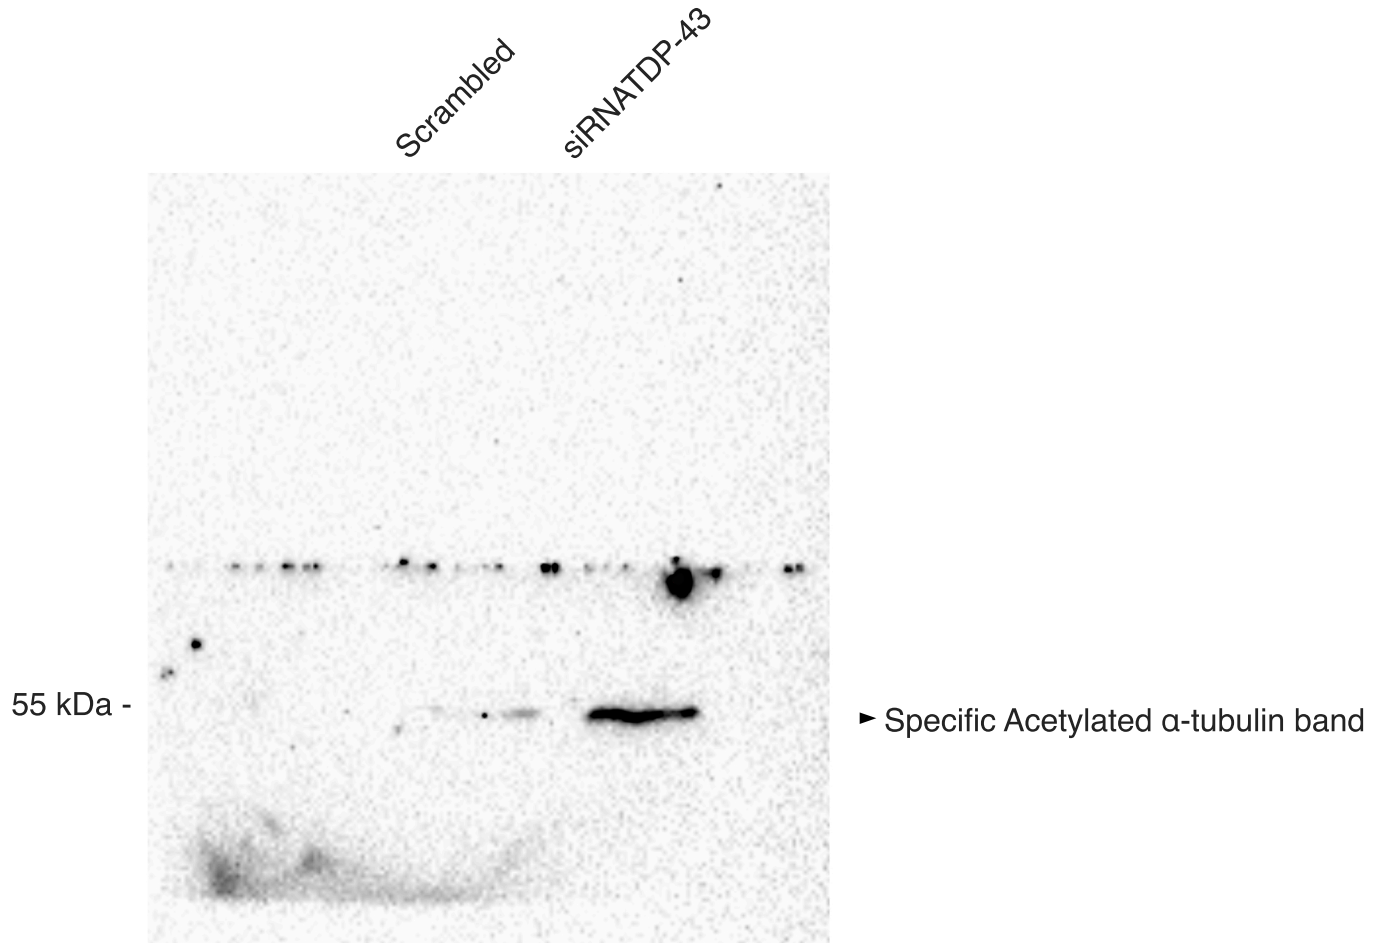

**Figure S6.** Replicate 1 Total  $\alpha$ -tubulin complete gel Western-blot associated with Figure 6A  
Cabrera-Rodríguez, R., *et al.*

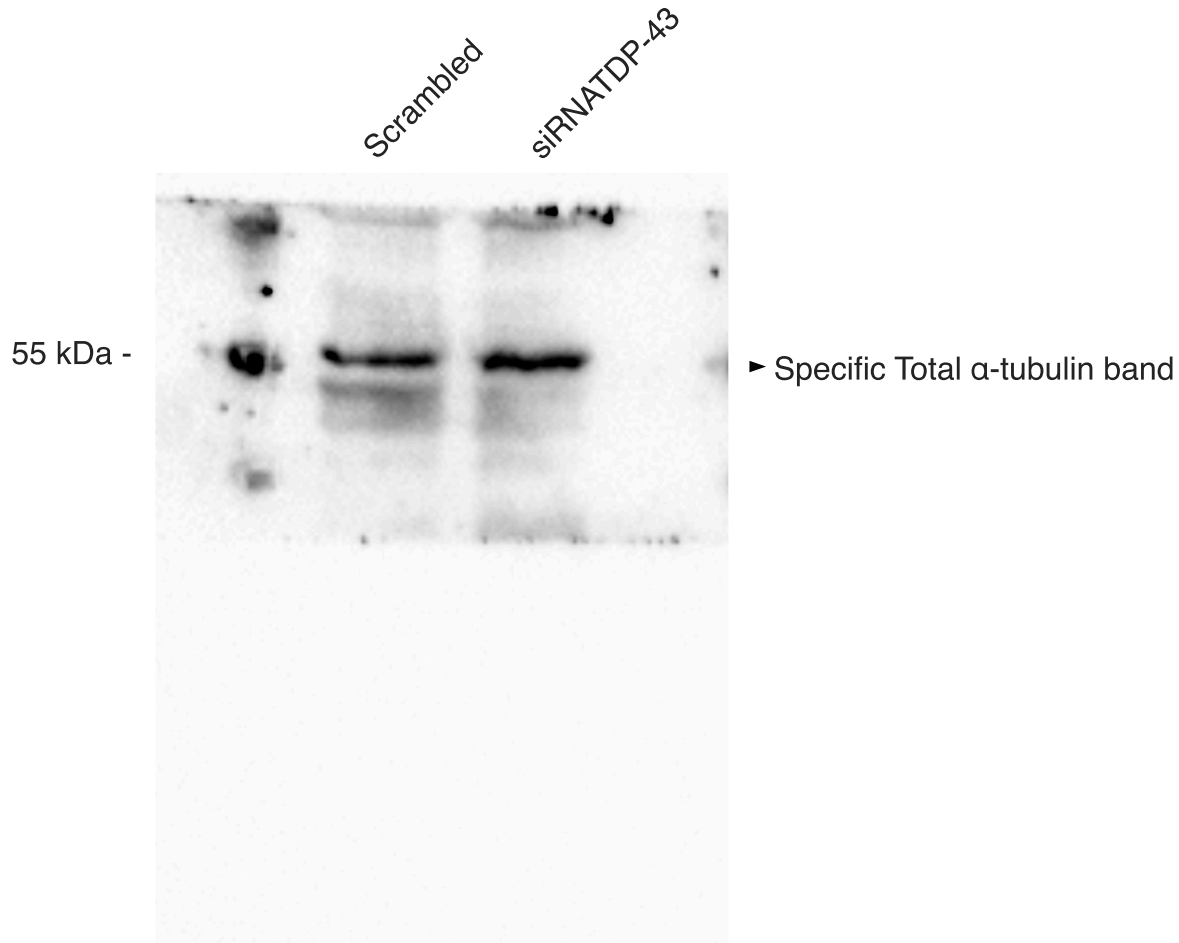



**Figure S6.** Replicate 2 HDAC6 complete gel Western-blot associated with Figure 6A  
Cabrera-Rodríguez, R., *et al.*

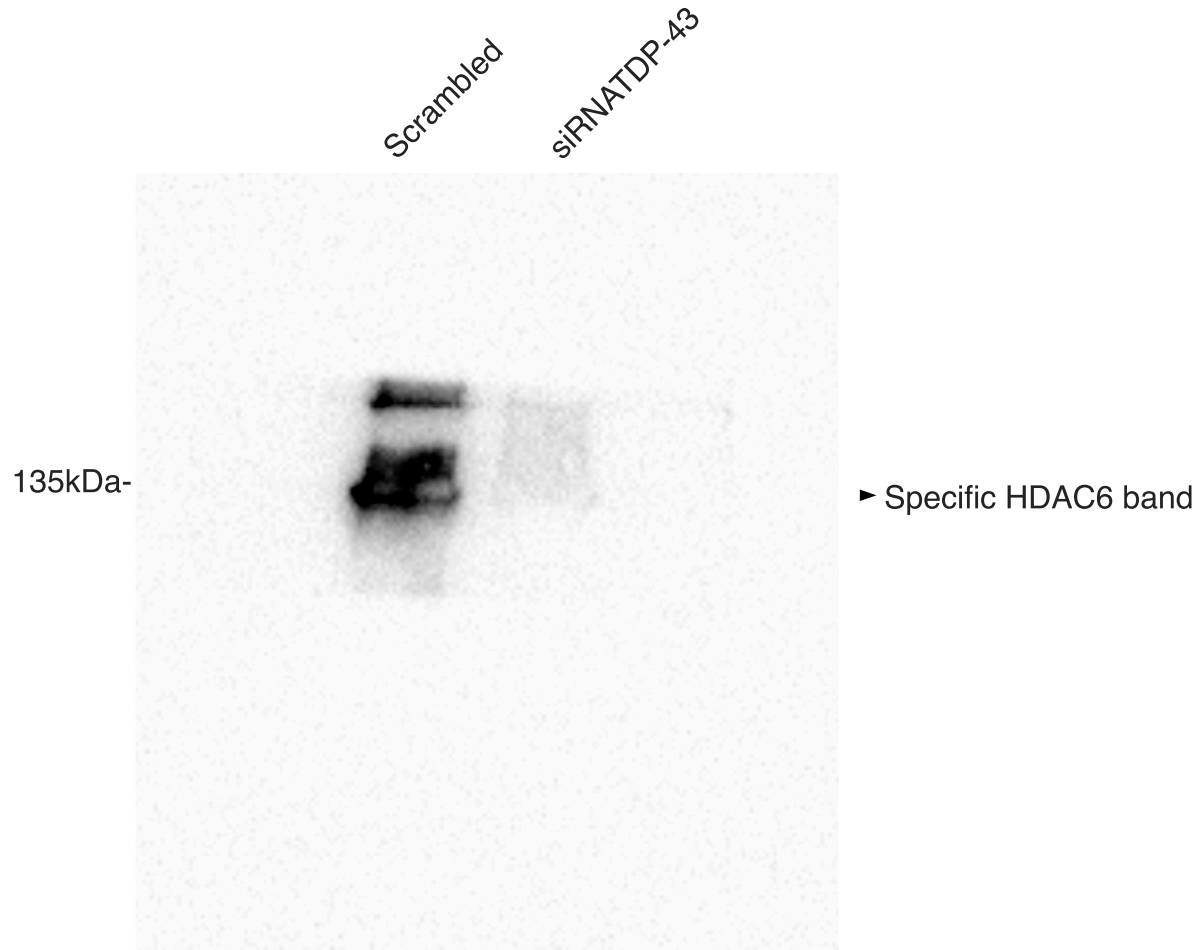

**Figure S6.** Replicate 2 TDP-43 complete gel Western-blot associated with Figure 6A  
Cabrera-Rodríguez, R., *et al.*

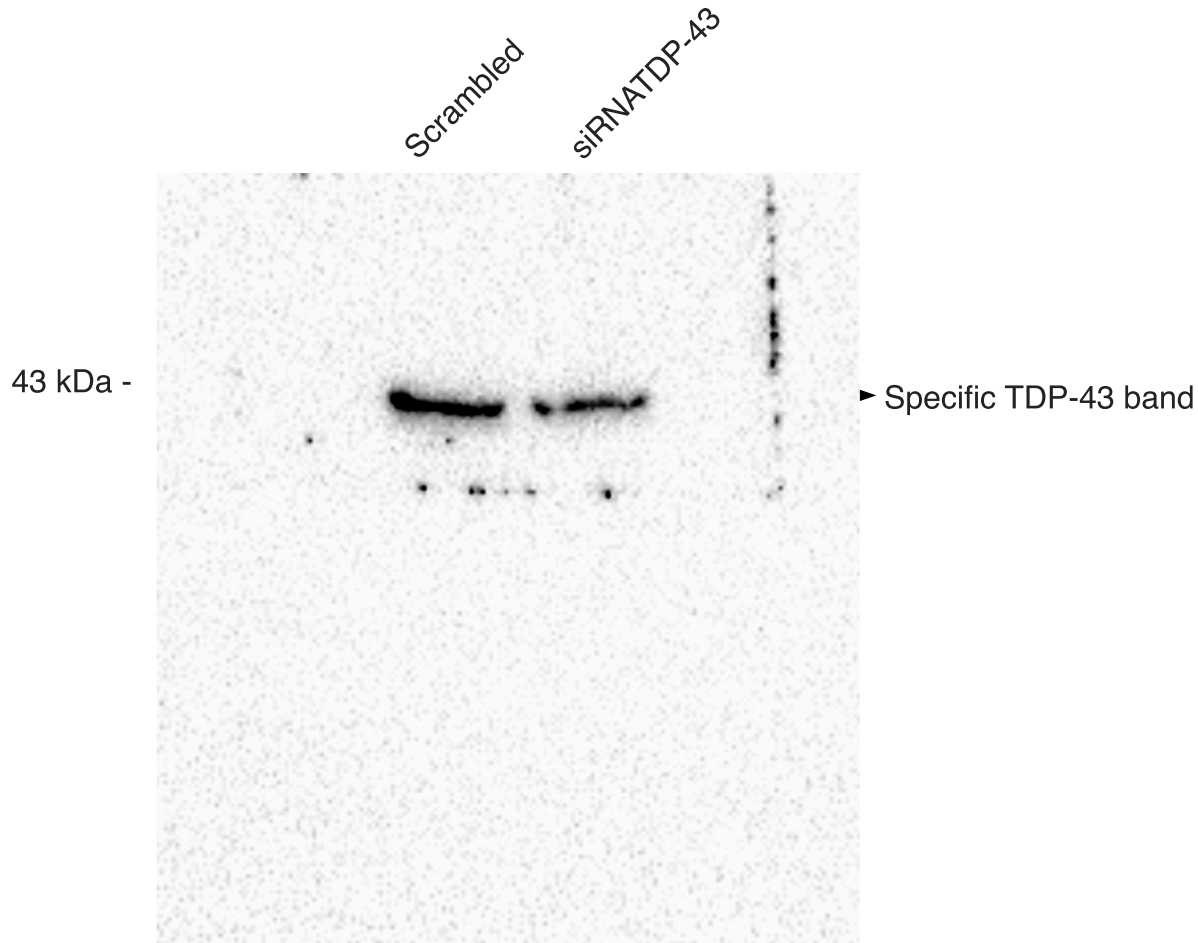

**Figure S6.** Replicate 2 Acetylated  $\alpha$ -tubulin complete gel Western-blot associated with Figure 6A  
Cabrera-Rodríguez, R., *et al.*

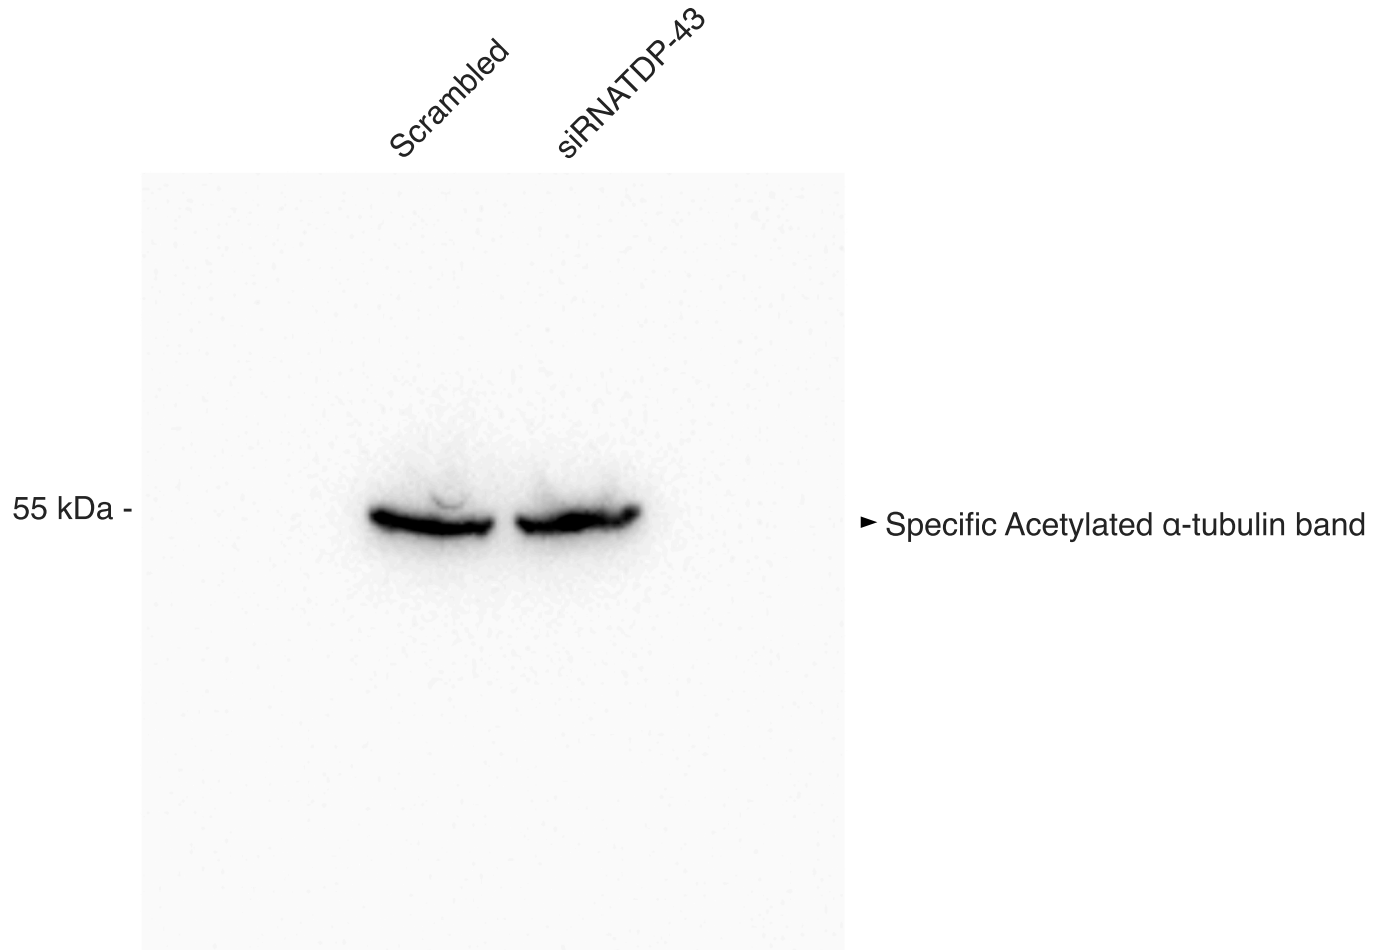

**Figure S6.** Replicate 2 Total  $\alpha$ -tubulin complete gel Western-blot associated with Figure 6A  
Cabrera-Rodríguez, R., *et al.*

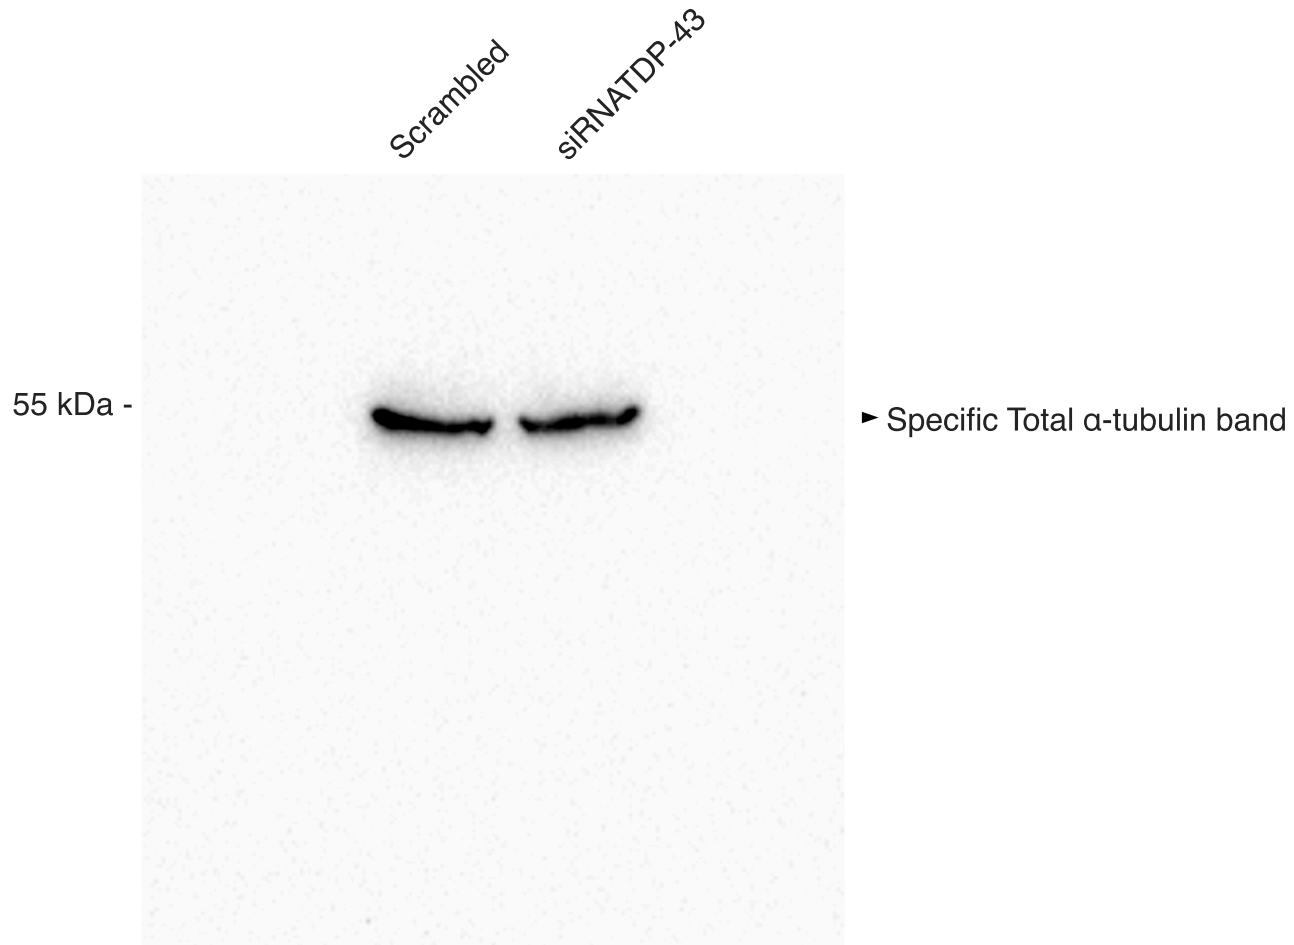

**Figure S6.** Replicate 3 HDAC6 complete gel Western-blot associated with Figure 6A  
Cabrera-Rodríguez, R., *et al.*

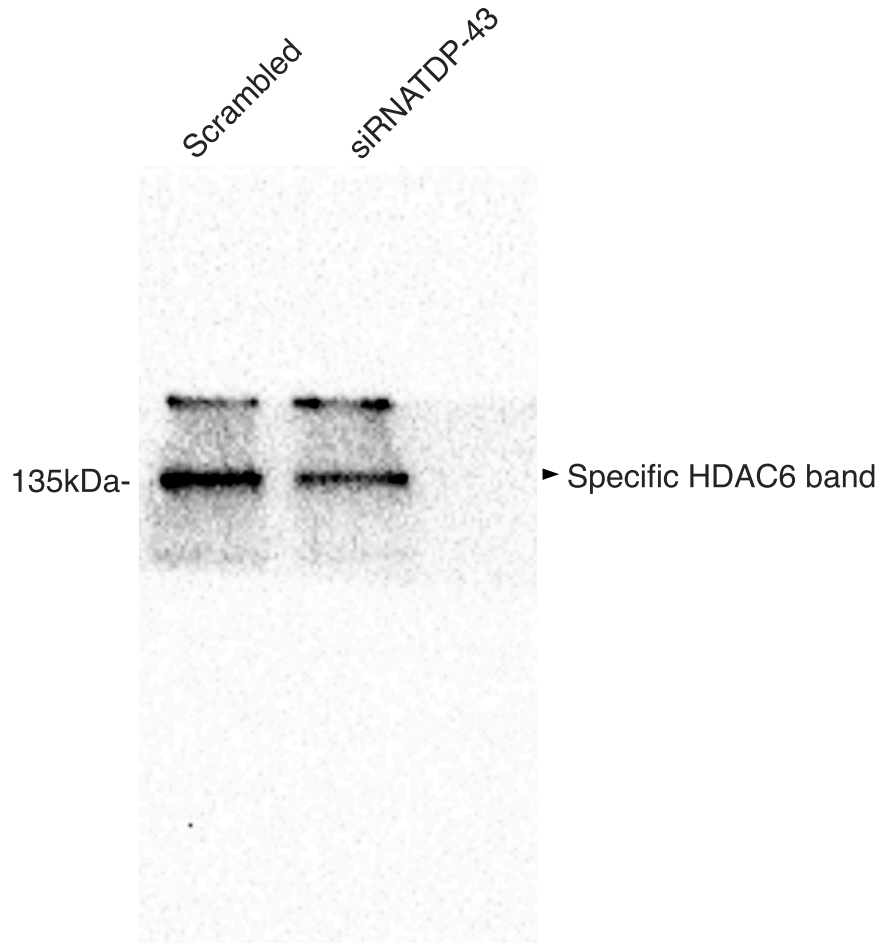

**Figure S6.** Replicate 3 TDP-43 complete gel Western-blot associated with Figure 6A  
Cabrera-Rodríguez, R., *et al.*

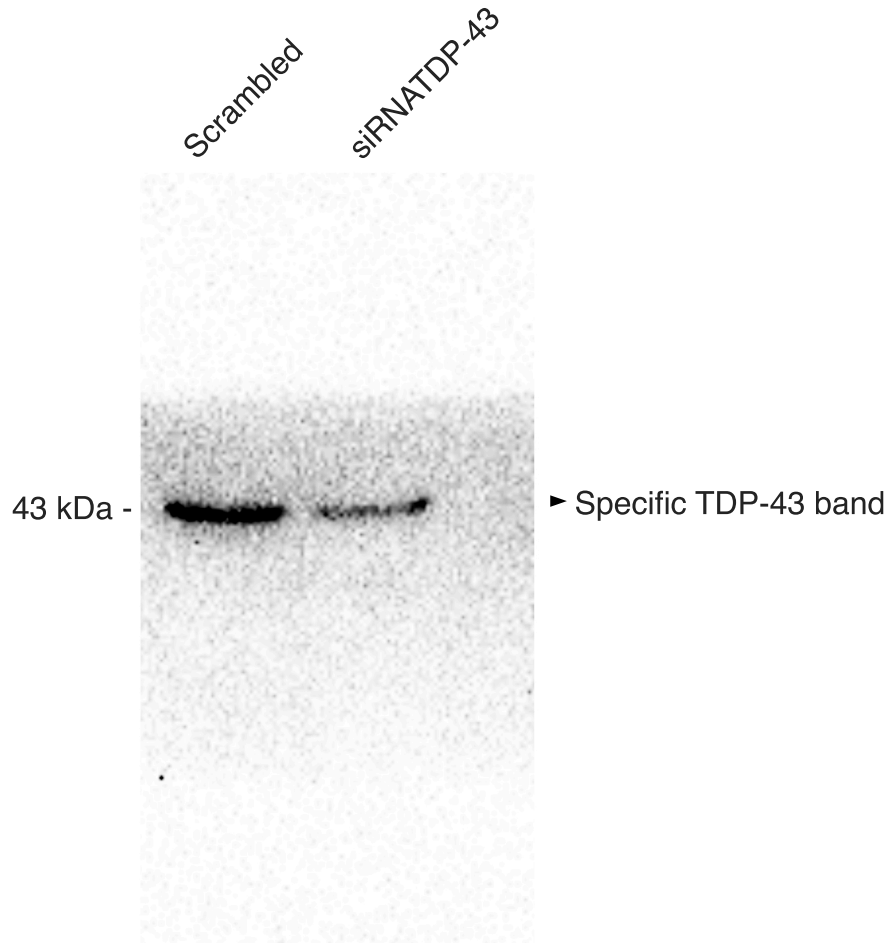

**Figure S6.** Replicate 3 Acetylated  $\alpha$ -tubulin complete gel Western-blot associated with Figure 6A  
Cabrera-Rodríguez, R., *et al.*

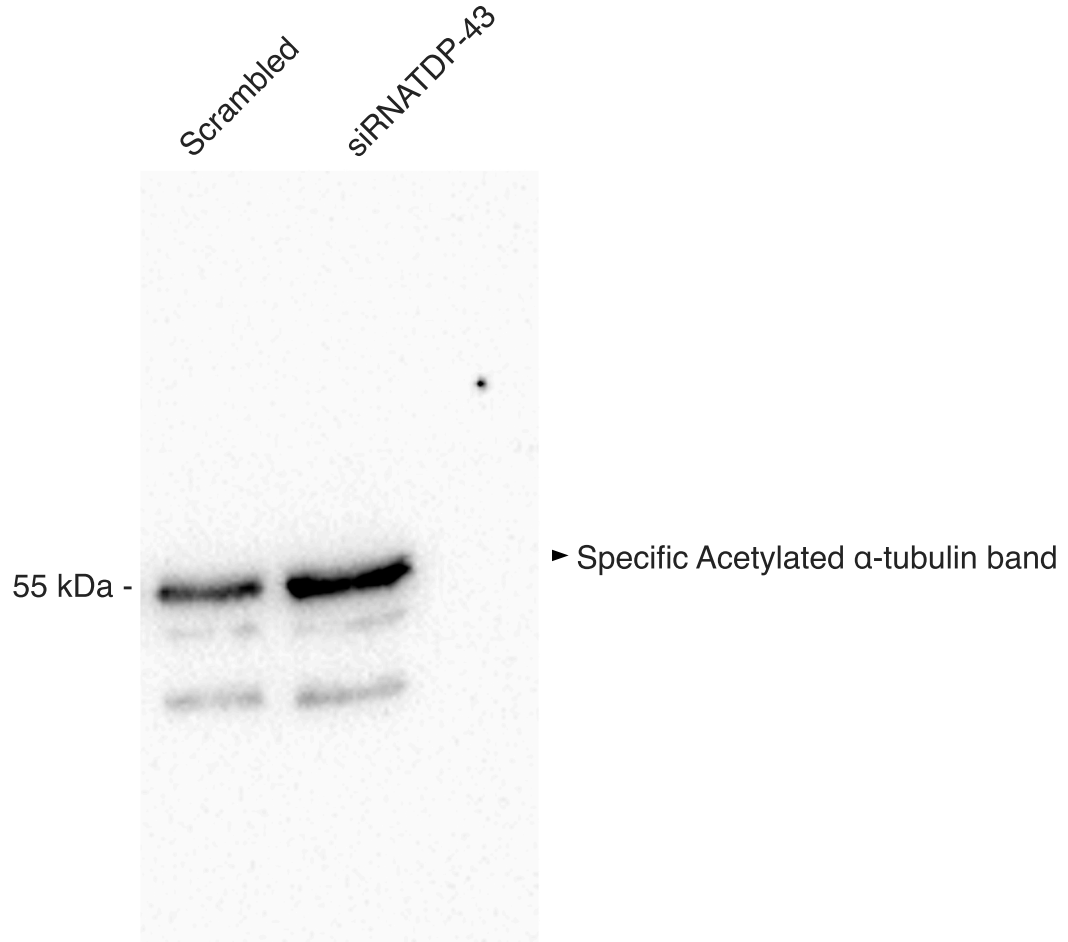

**Figure S6.** Replicate 3 Total  $\alpha$ -tubulin complete gel Western-blot associated with Figure 6A  
Cabrera-Rodríguez, R., *et al.*

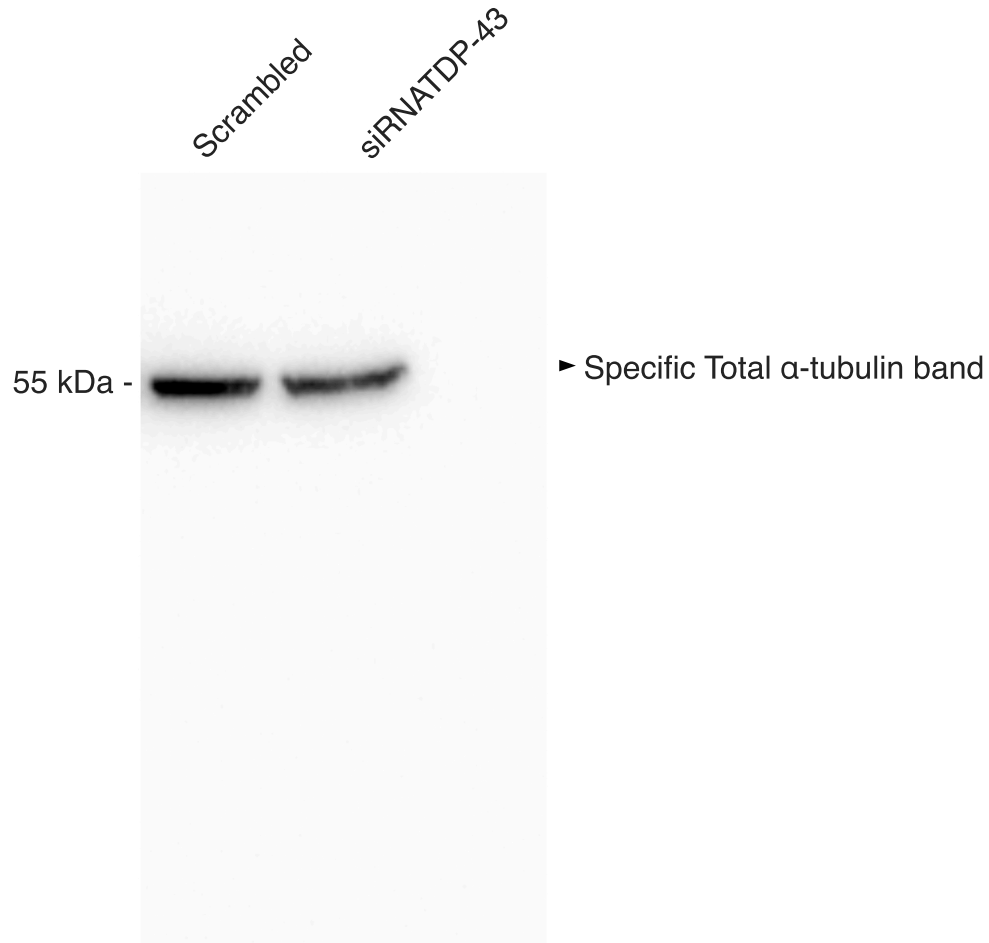



Replicate 1 as figure format

A

Lysis of cell-producing virus

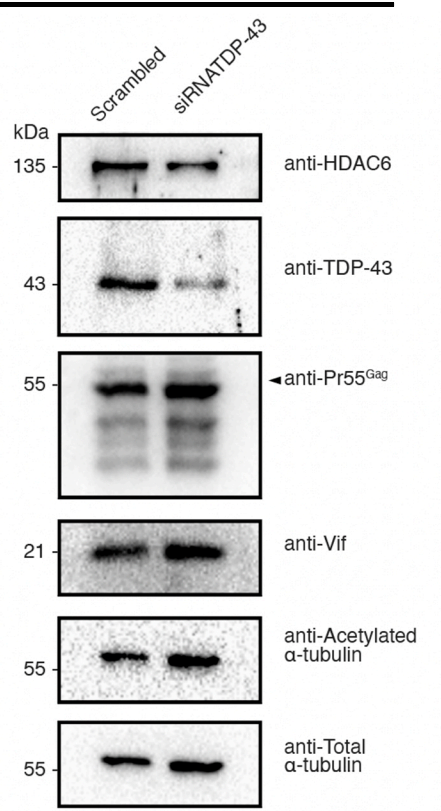

Replicate 2 as figure format

A

Lysis of cell-producing virus

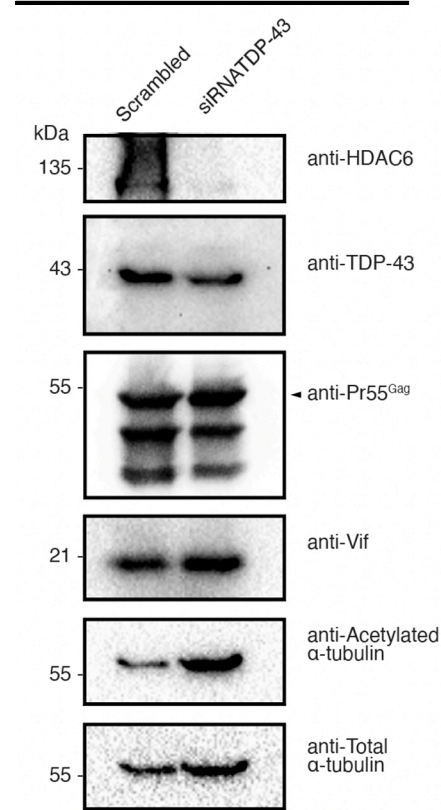

Replicate 3 as figure format

A

Lysis of cell-producing virus

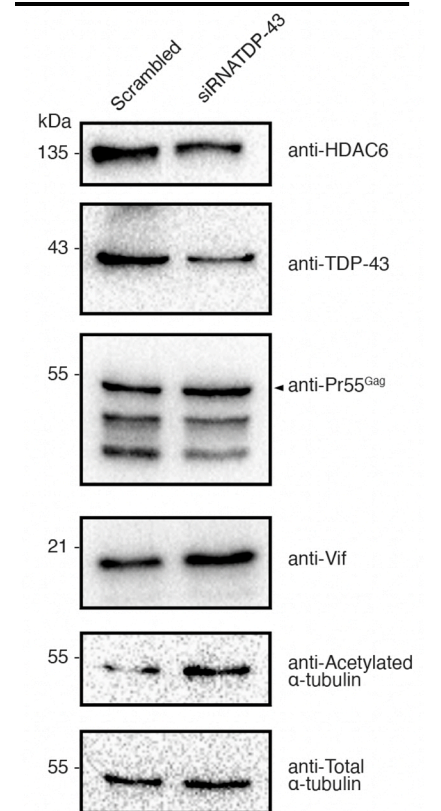

**Figure S7A.** Replicate 1 HDAC6 complete gel Western-blot associated with Figure 7A  
Cabrera-Rodríguez, R., *et al.*

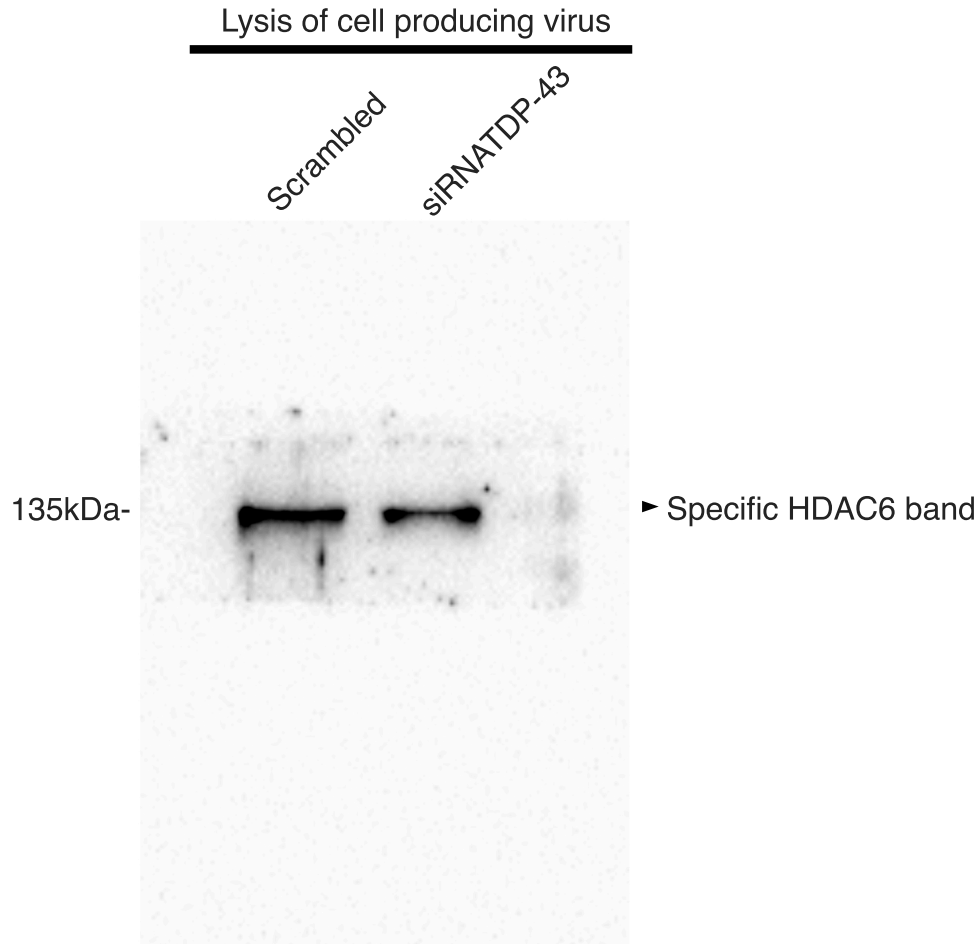

**Figure S7A.** Replicate 1 TDP-43 complete gel Western-blot associated with Figure 7A  
Cabrera-Rodríguez, R., *et al.*

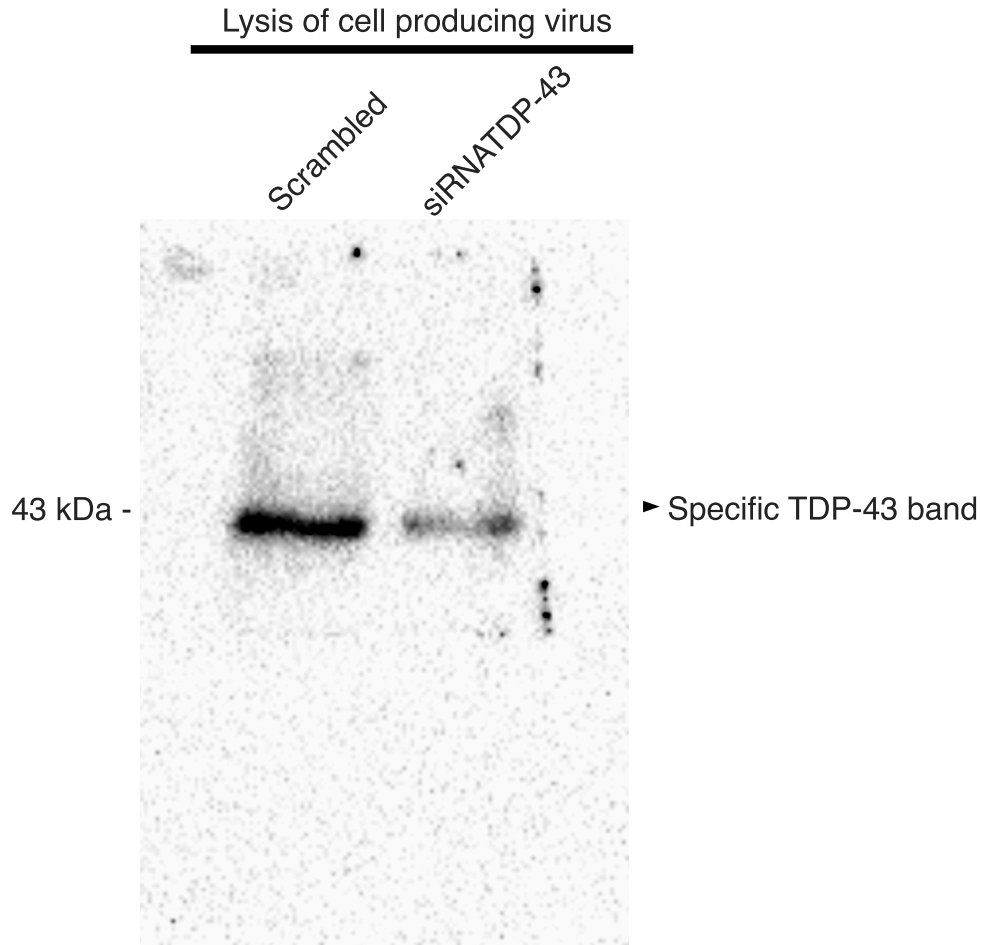

**Figure S7A.** Replicate 1 Pr55<sup>Gag</sup> complete gel Western-blot associated with Figure 7A  
Cabrera-Rodríguez, R., *et al.*

Lysis of cell producing virus

---

Scrambled

siRNATDP-43

55 kDa -

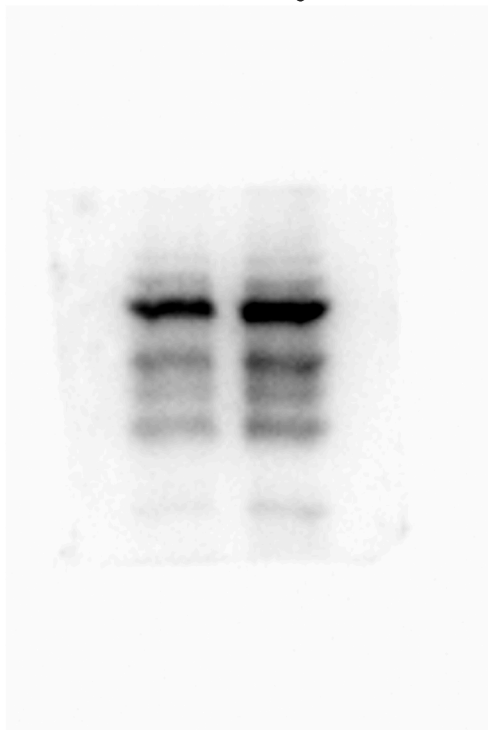

► Specific Pr55<sup>Gag</sup> band

**Figure S7A.** Replicate 1 Vif complete gel Western-blot associated with Figure 7A  
Cabrera-Rodríguez, R., *et al.*

Lysis of cell producing virus

Scrambled

siRNATDP-43

21 kDa -

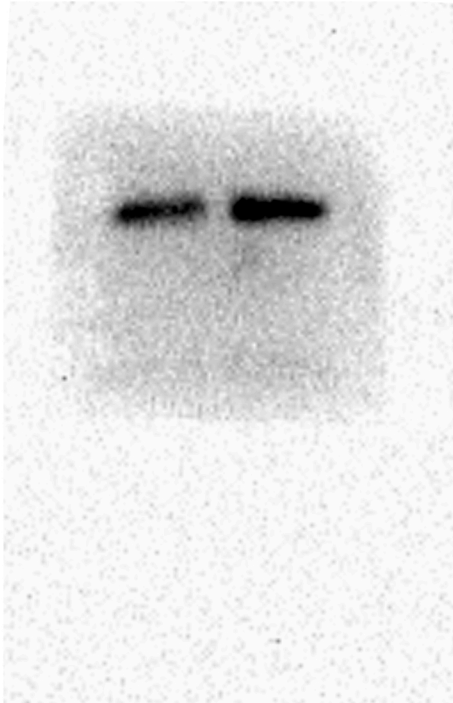

► Specific Vif band

**Figure S7A.** Replicate 1 Acetylated  $\alpha$ -tubulin complete gel Western-blot associated with Figure 7A  
Cabrera-Rodríguez, R., *et al.*

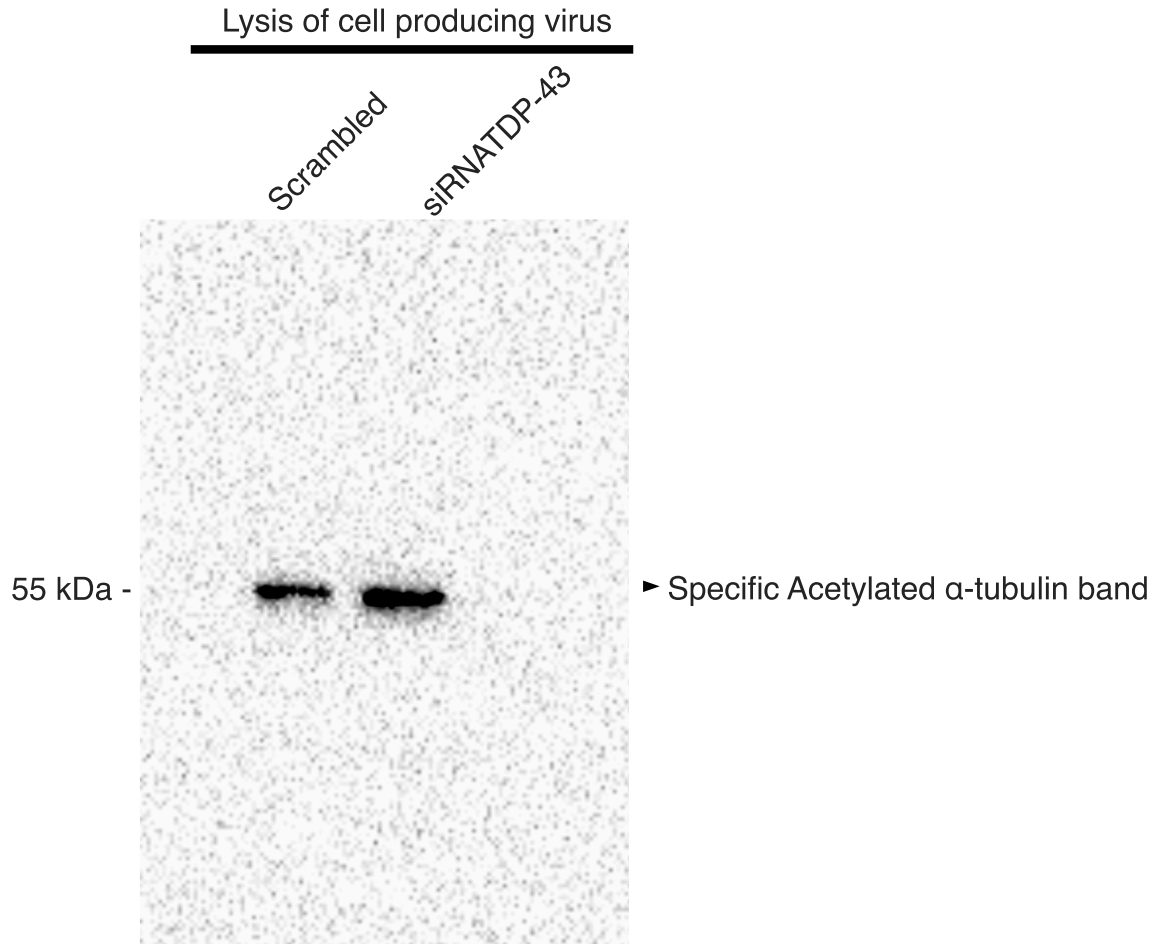

**Figure S7A.** Replicate 1 Total  $\alpha$ -tubulin complete gel Western-blot associated with Figure 7A  
Cabrera-Rodríguez, R., *et al.*

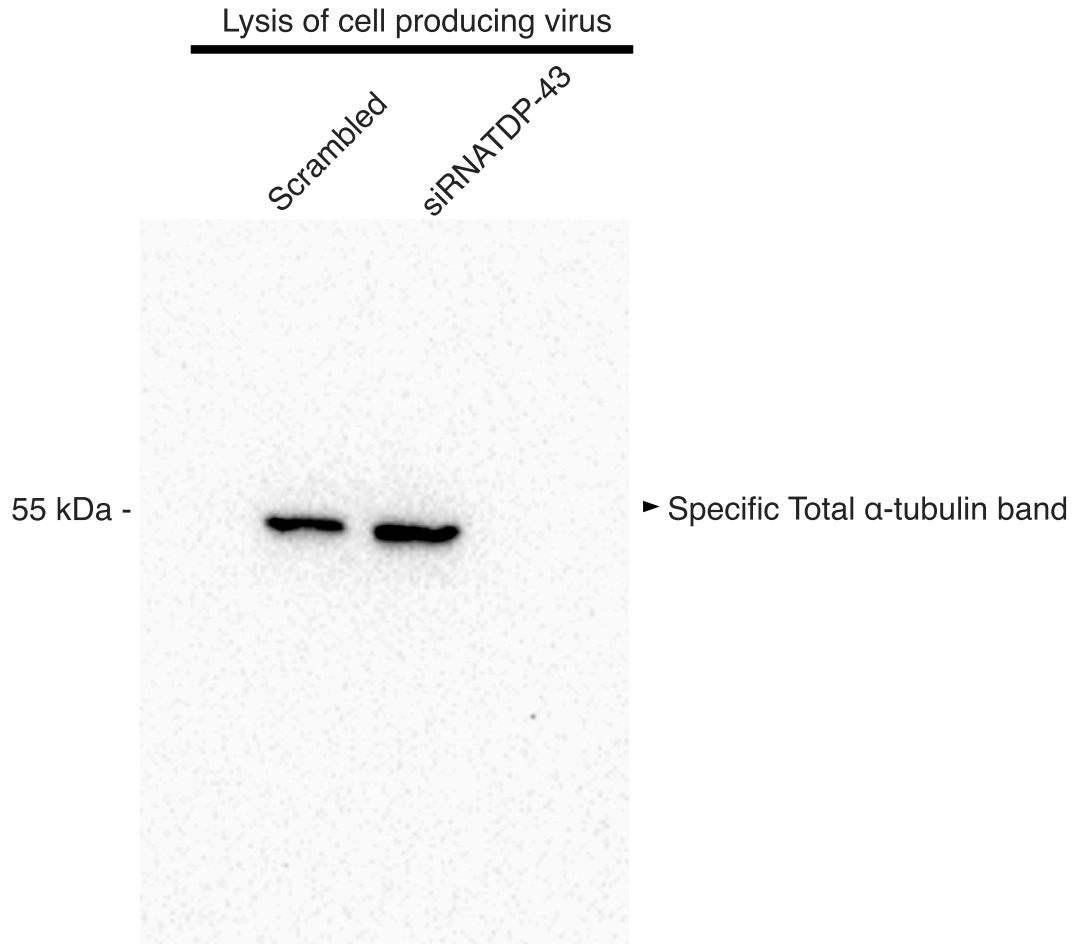

**Figure S7A.** Replicate 2 HDAC6 complete gel Western-blot associated with Figure 7A  
Cabrera-Rodríguez, R., *et al.*

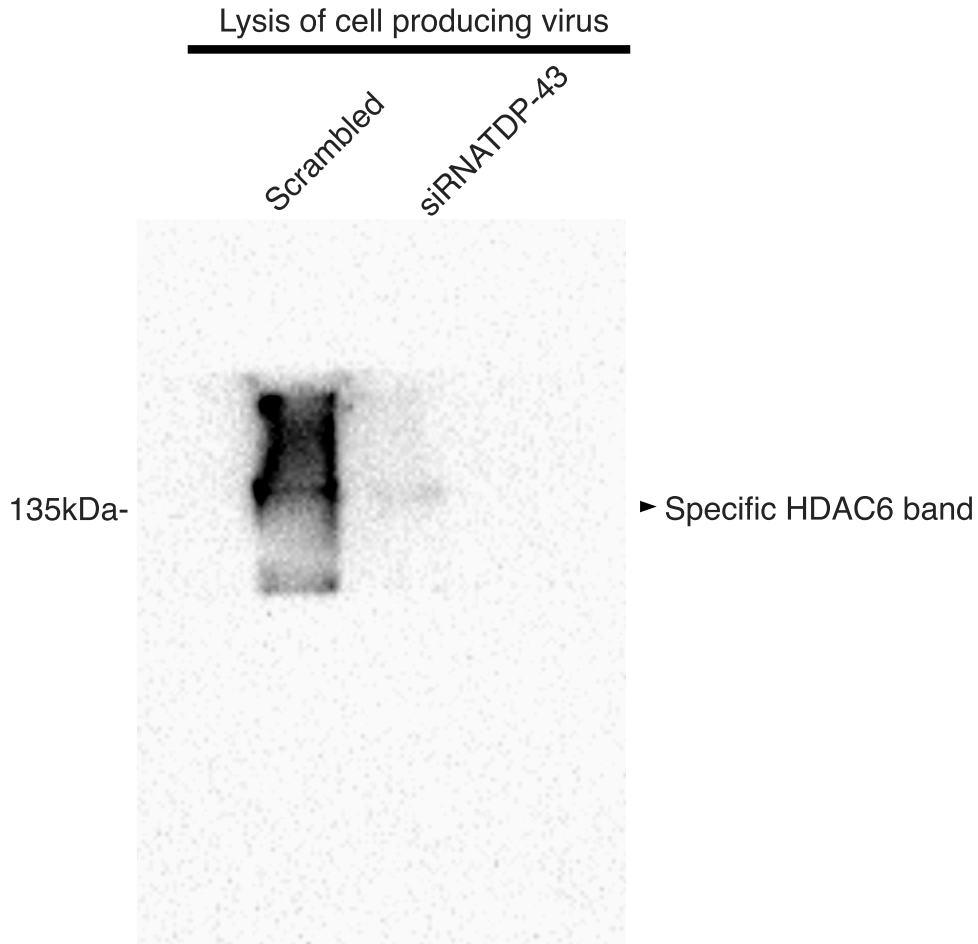



**Figure S7A.** Replicate 2 TDP-43 complete gel Western-blot associated with Figure 7A  
Cabrera-Rodríguez, R., *et al.*

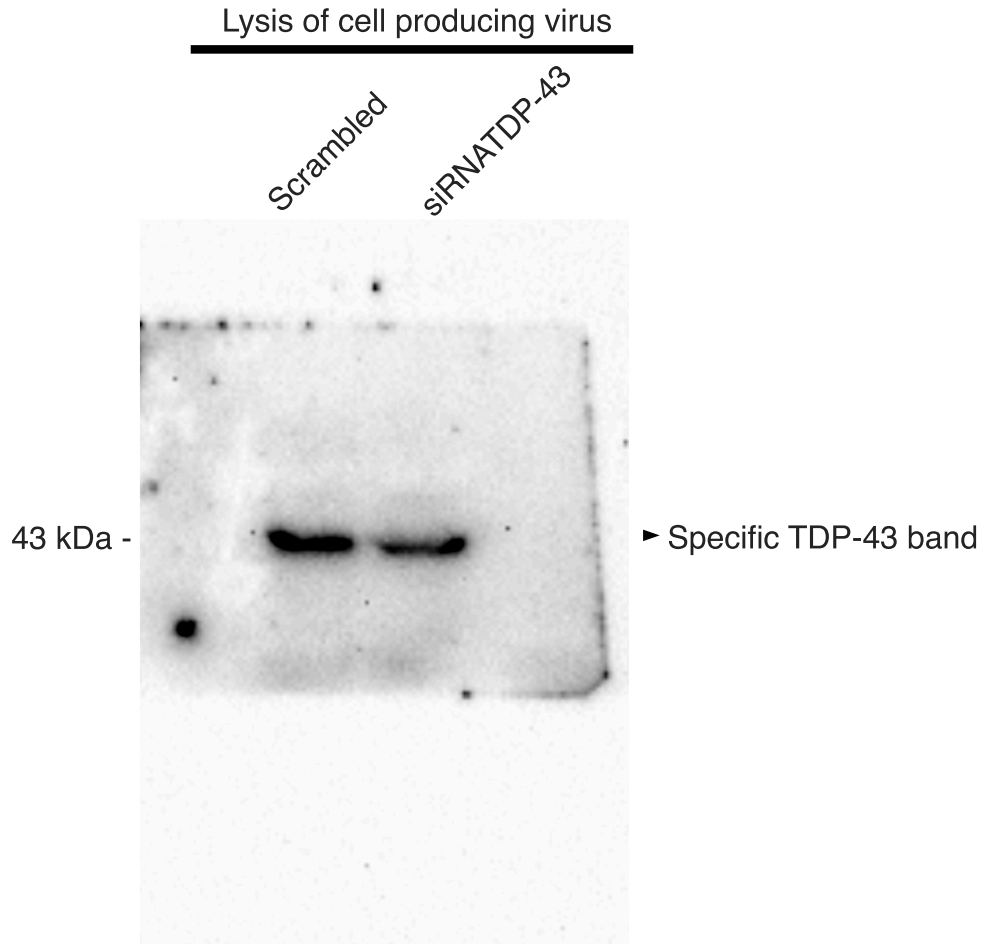

**Figure S7A.** Replicate 2 Pr55<sup>Gag</sup> complete gel Western-blot associated with Figure 7A  
Cabrera-Rodríguez, R., *et al.*

Lysis of cell producing virus

Scrambled

siRNATDP-43

55 kDa -

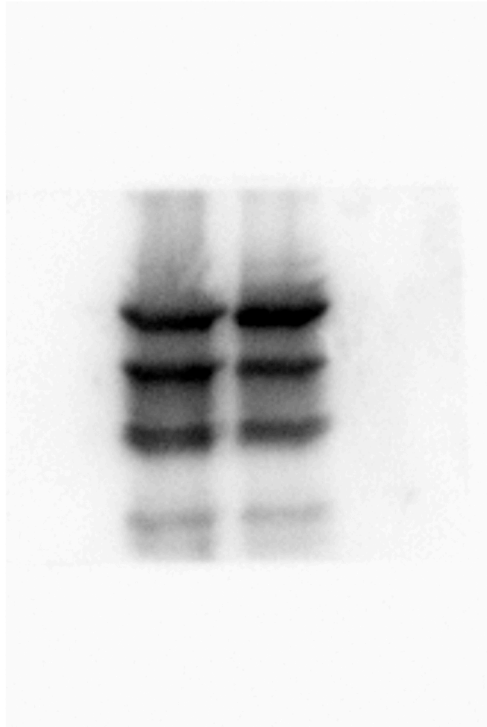

► Specific Pr55<sup>Gag</sup> band

**Figure S7A.** Replicate 2 Vif complete gel Western-blot associated with Figure 7A  
Cabrera-Rodríguez, R., *et al.*

Lysis of cell producing virus

---

Scrambled

siRNATDP-43

21 kDa -

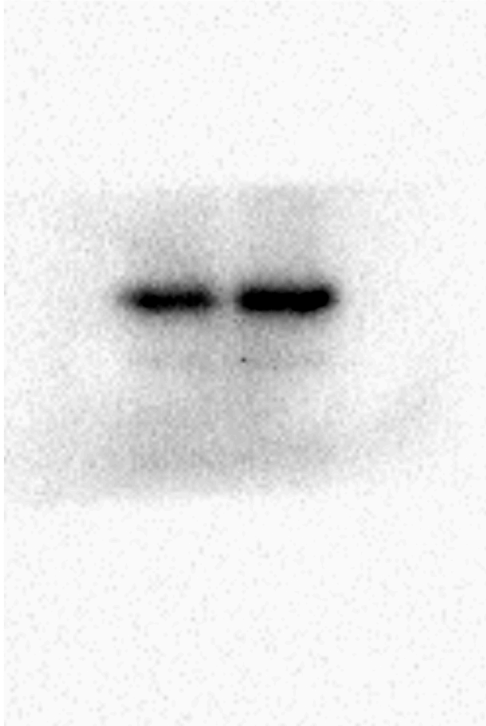

► Specific Vif band

**Figure S7A.** Replicate 2 Acetylated  $\alpha$ -tubulin complete gel Western-blot associated with Figure 7A  
Cabrera-Rodríguez, R., *et al.*

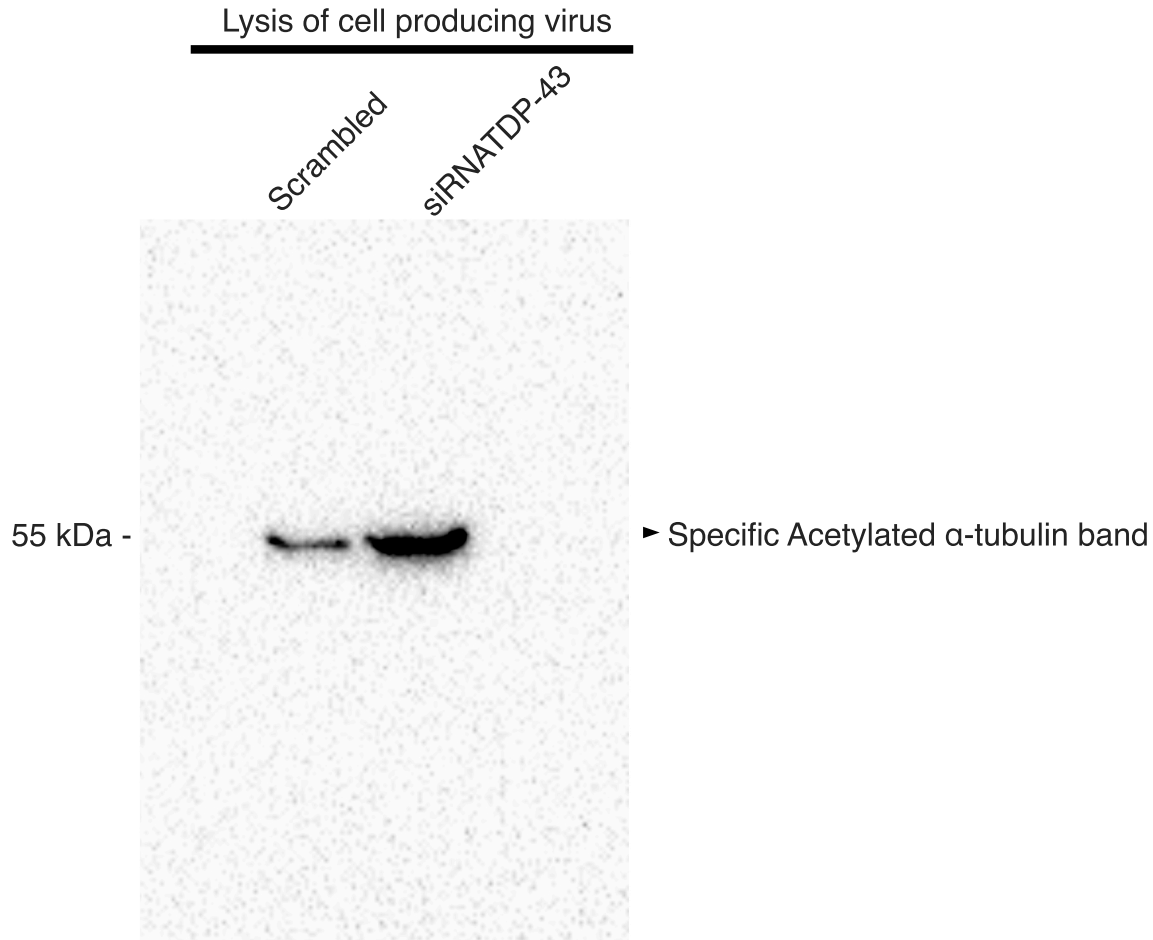

**Figure S7A.** Replicate 2 Total  $\alpha$ -tubulin complete gel Western-blot associated with Figure 7A  
Cabrera-Rodríguez, R., *et al.*

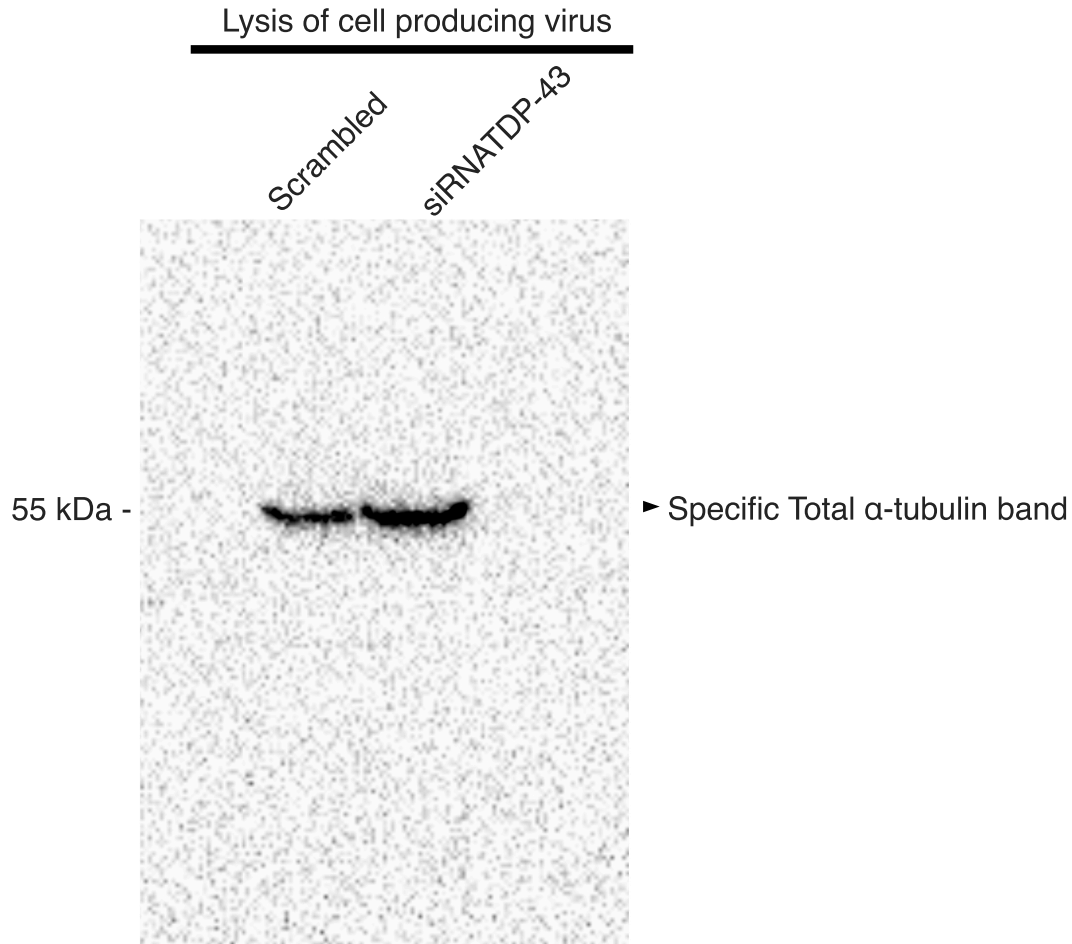

**Figure S7A.** Replicate 3 HDAC6 complete gel Western-blot associated with Figure 7A  
Cabrera-Rodríguez, R., *et al.*

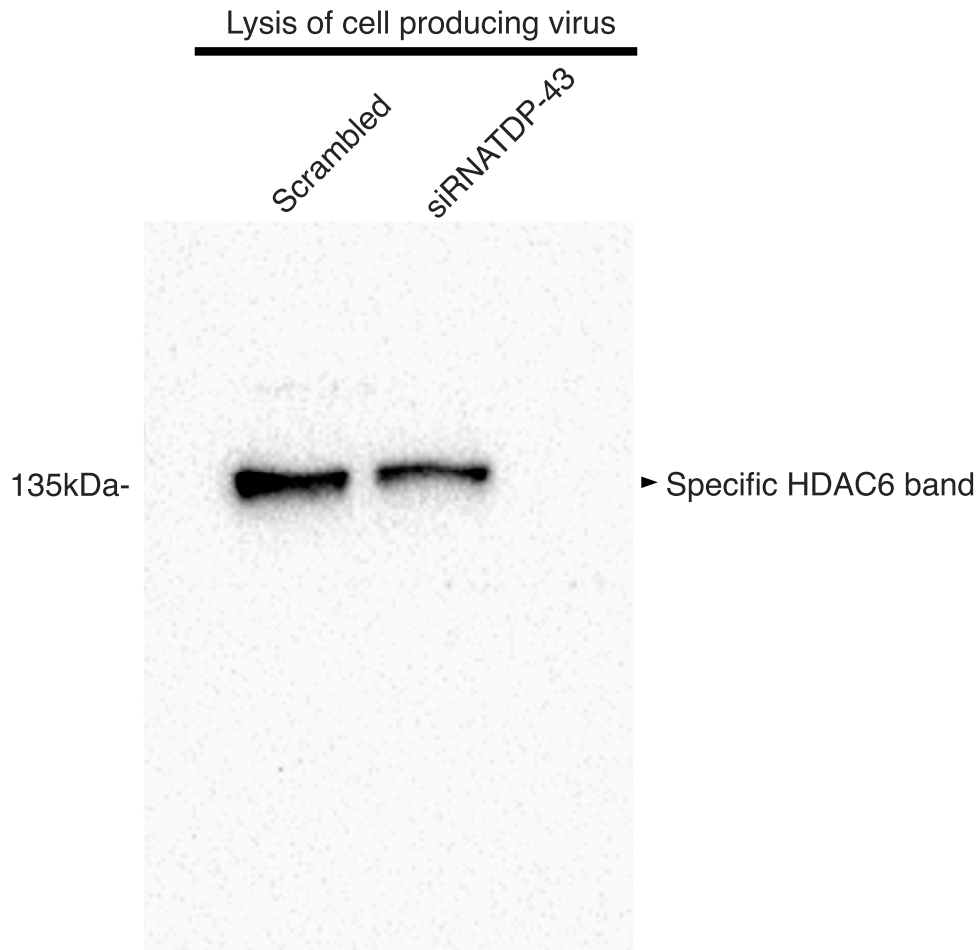

**Figure S7A.** Replicate 3 TDP-43 complete gel Western-blot associated with Figure 7A  
Cabrera-Rodríguez, R., *et al.*

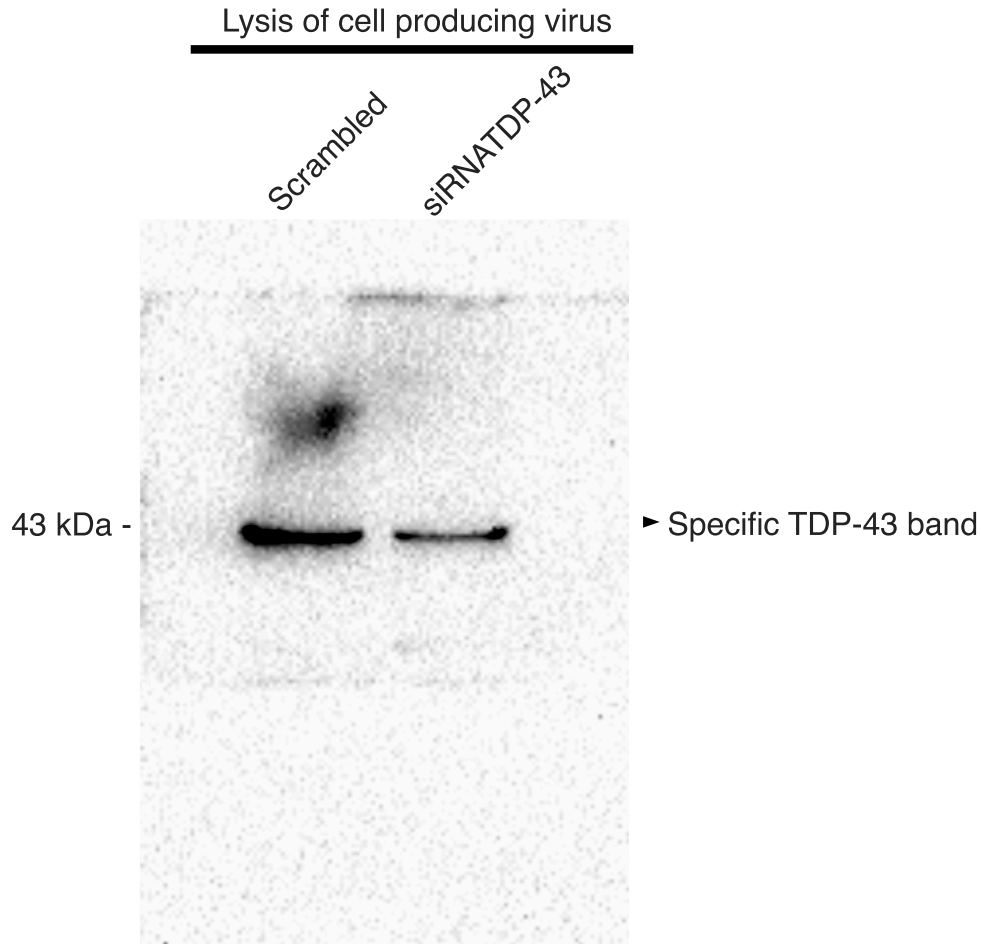

**Figure S7A.** Replicate 3 Pr55<sup>Gag</sup> complete gel Western-blot associated with Figure 7A  
Cabrera-Rodríguez, R., *et al.*

Lysis of cell producing virus

---

Scrambled

siRNATDP-43

55 kDa -

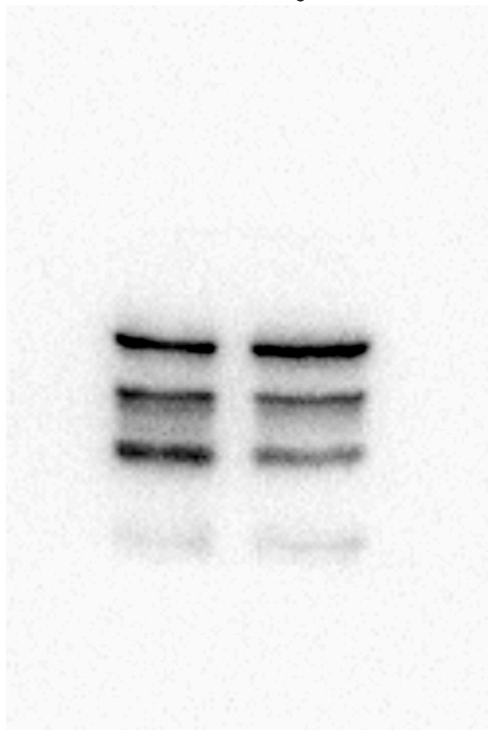

► Specific Pr55<sup>Gag</sup> band



**Figure S7A.** Replicate 3 Vif complete gel Western-blot associated with Figure 7A  
Cabrera-Rodríguez, R., *et al.*

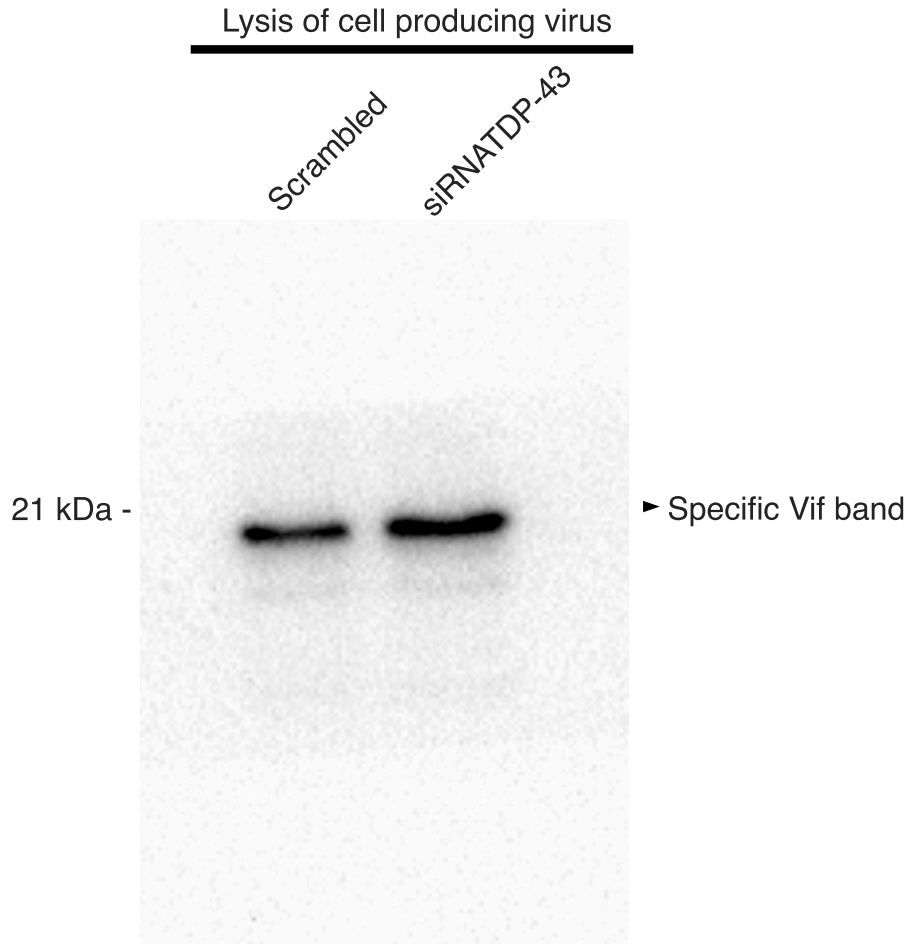

**Figure S7A.** Replicate 3 Acetylated  $\alpha$ -tubulin complete gel Western-blot associated with Figure 7A  
Cabrera-Rodríguez, R., *et al.*

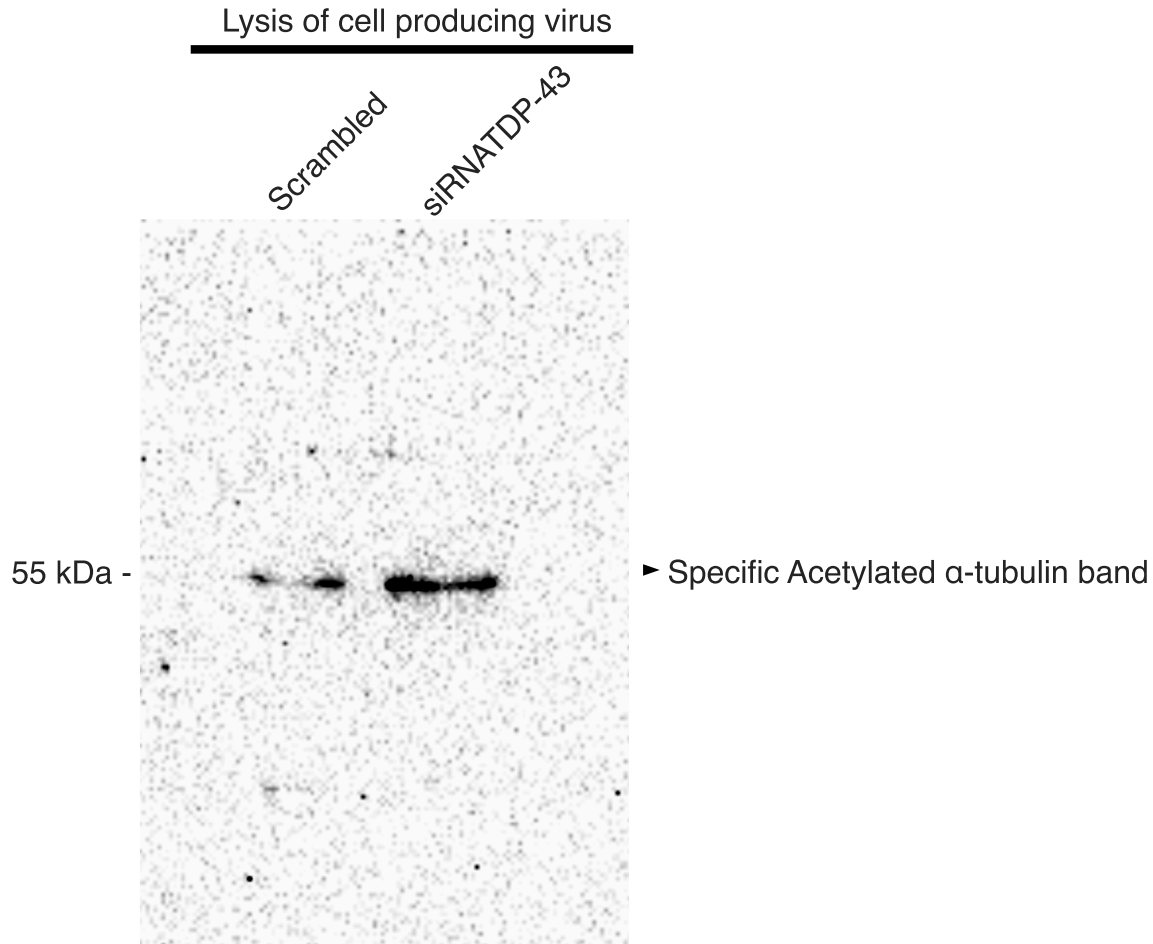

**Figure S7A.** Replicate 3 Total  $\alpha$ -tubulin complete gel Western-blot associated with Figure 7A  
Cabrera-Rodríguez, R., *et al.*

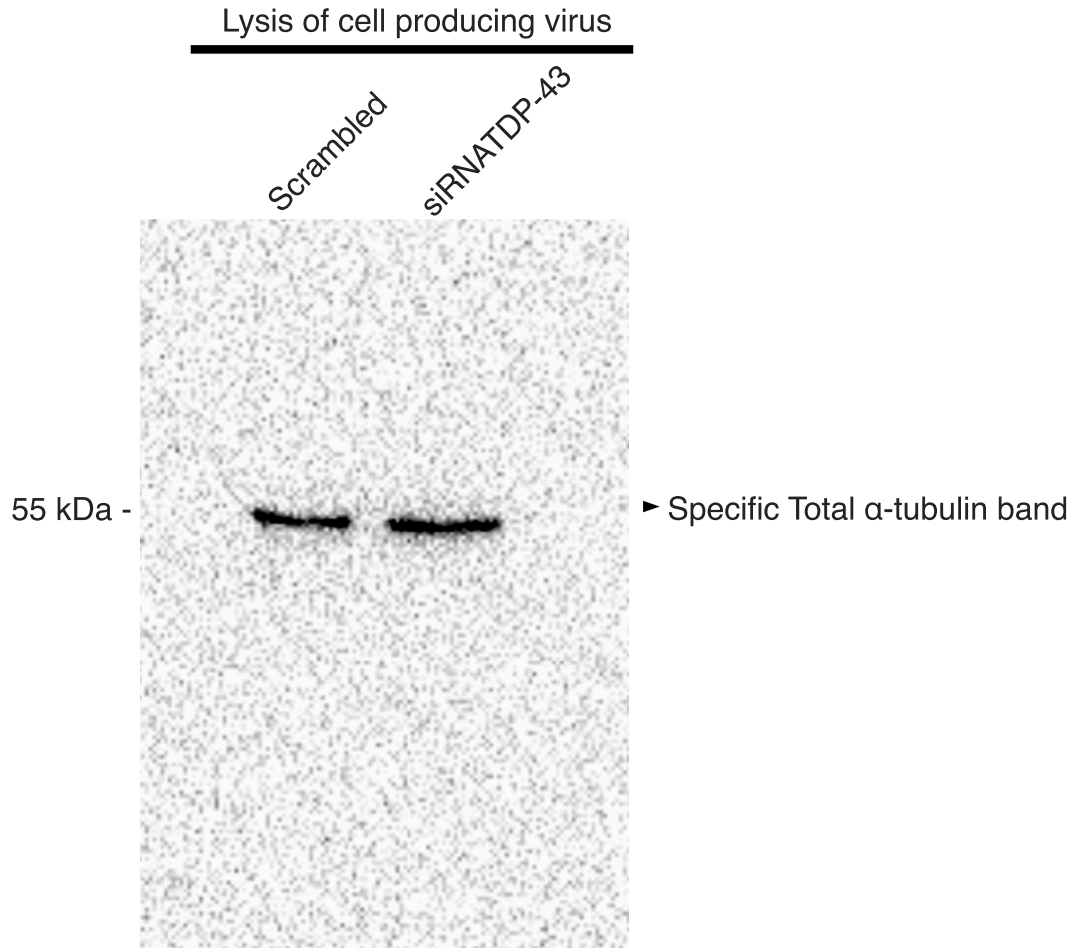

C Replicate 1 as figure format

Lysis of virions produced under different experimental conditions

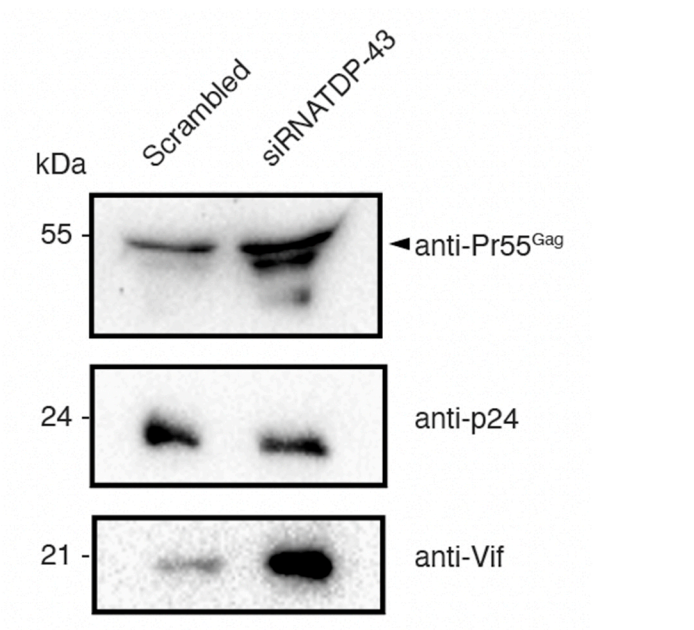

C Replicate 2 as figure format

Lysis of virions produced under different experimental conditions

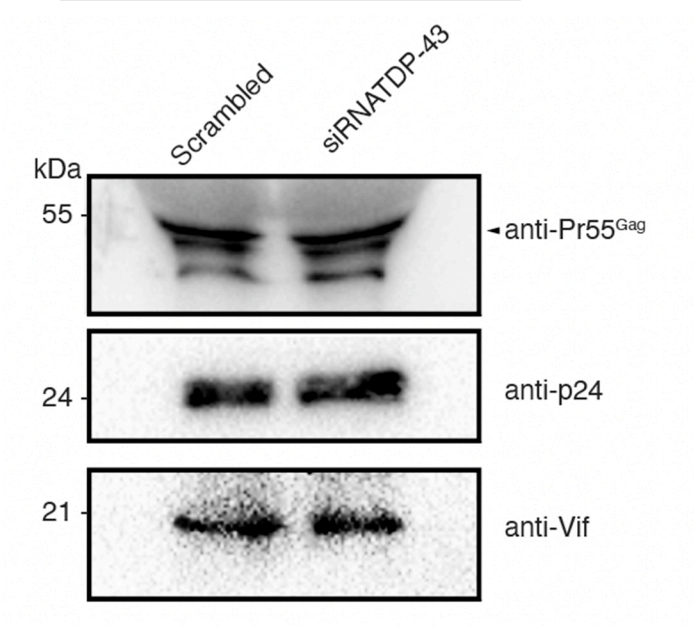

C Replicate 3 as figure format

Lysis of virions produced under different experimental conditions

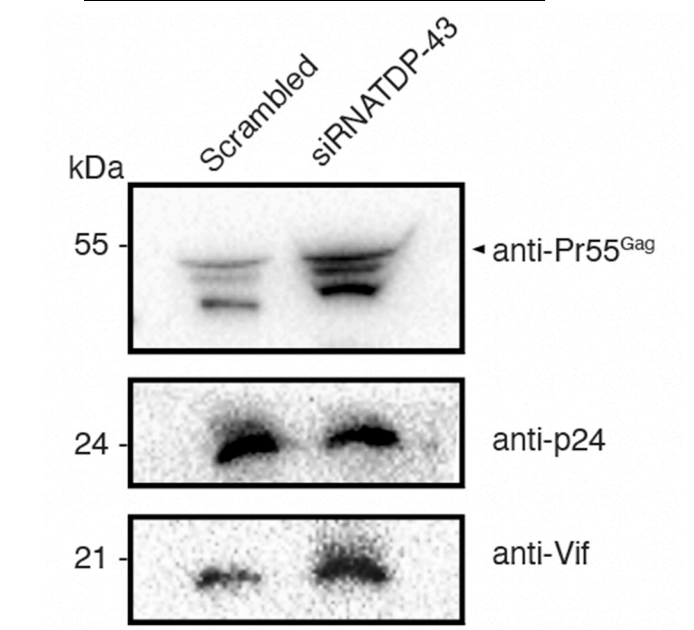

**Figure S7C.** Replicate 1 Pr55<sup>Gag</sup> complete gel Western-blot associated with Figure 7C  
Cabrera-Rodríguez, R., *et al.*

Lysis of virions produced under  
different experimental conditions

---

Scrambled  
siRNATDP-43

55 kDa -

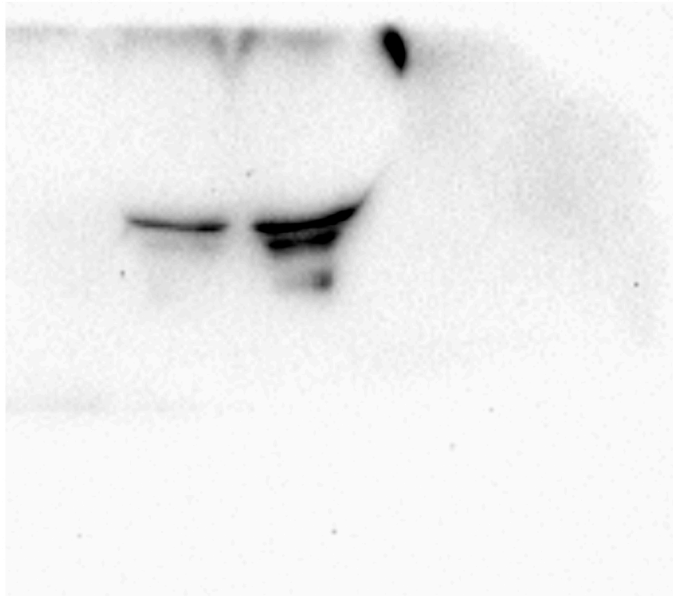

◀ Specific Pr55<sup>Gag</sup> band

**Figure S7C.** Replicate 1 p24 complete gel Western-blot associated with Figure 7C  
Cabrera-Rodríguez, R., *et al.*

Lysis of virions produced under  
different experimental conditions

---

Scrambled  
siRNATDP-43

24 kDa -

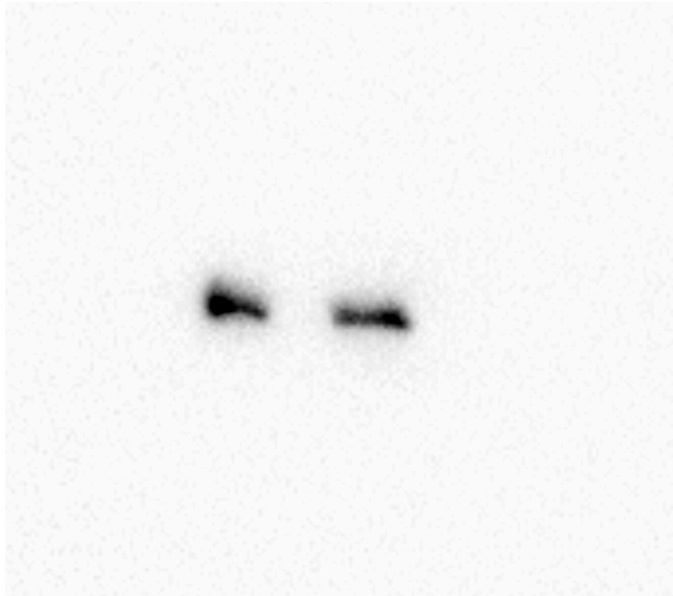

◀ Specific p24 band

**Figure S7C.** Replicate 1 Vif complete gel Western-blot associated with Figure 7C  
Cabrera-Rodríguez, R., *et al.*

Lysis of virions produced under  
different experimental conditions

---

Scrambled  
siRNATDP-43

21 kDa -

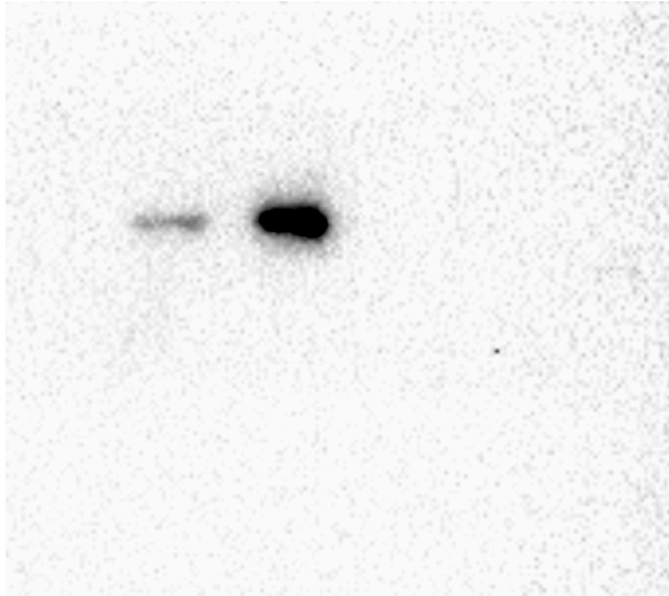

◀ Specific Vif band

**Figure S7C.** Replicate 2 Pr55<sup>Gag</sup> complete gel Western-blot associated with Figure 7C  
Cabrera-Rodríguez, R., *et al.*

Lysis of virions produced under  
different experimental conditions

---

Scrambled  
siRNATDP-43

55 kDa -

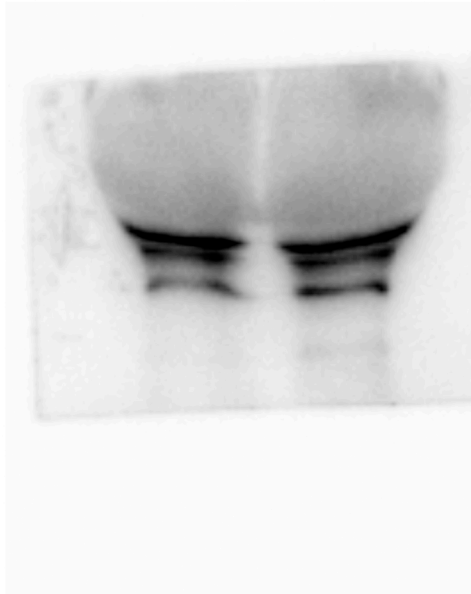

◀ Specific Pr55<sup>Gag</sup> band



**Figure S7C.** Replicate 2 p24 complete gel Western-blot associated with Figure 7C  
Cabrera-Rodríguez, R., *et al.*

Lysis of virions produced under  
different experimental conditions

---

Scrambled  
siRNATDP-43

24 kDa -

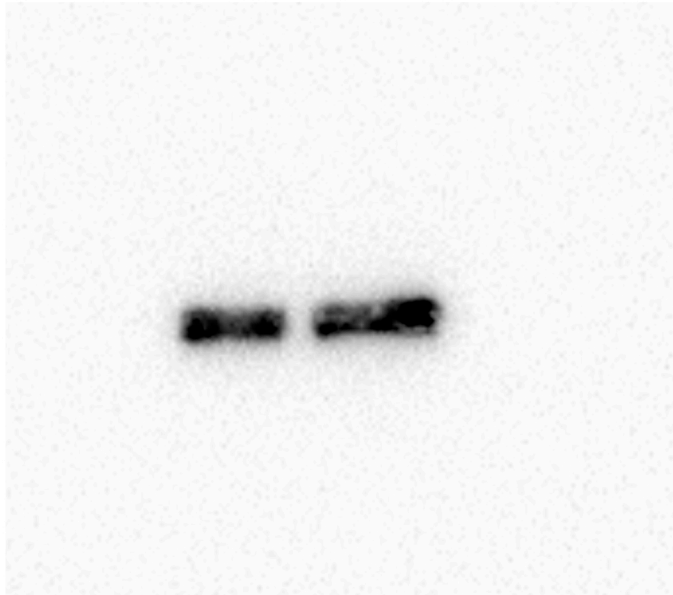

◀ Specific p24 band

**Figure S7C.** Replicate 2 Vif complete gel Western-blot associated with Figure 7C  
Cabrera-Rodríguez, R., *et al.*

Lysis of virions produced under  
different experimental conditions

---

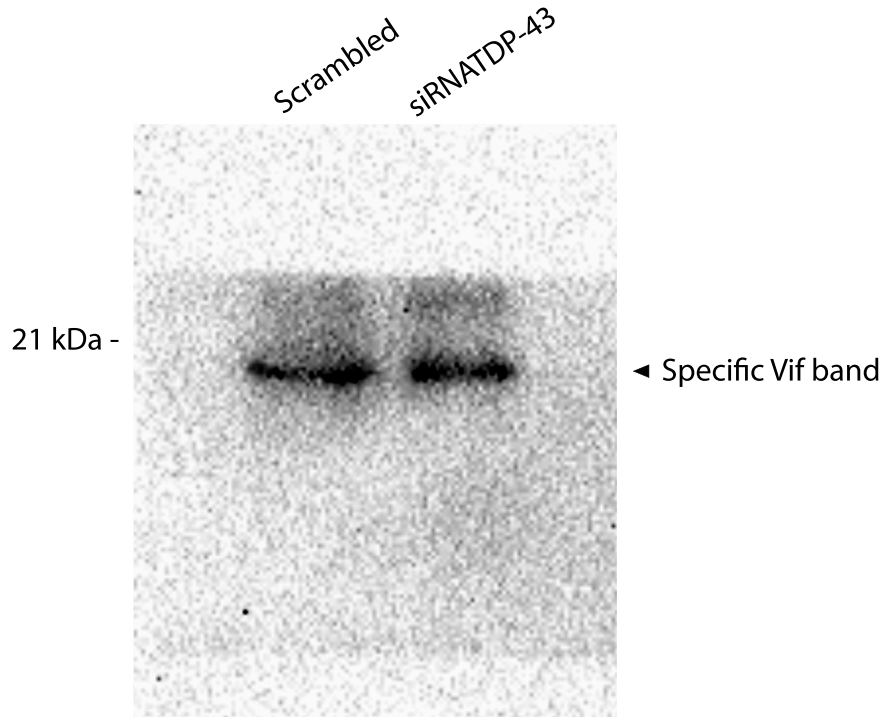

**Figure S7C.** Replicate 3 Pr55<sup>Gag</sup> complete gel Western-blot associated with Figure 7C  
Cabrera-Rodríguez, R., *et al.*

Lysis of virions produced under  
different experimental conditions

---

Scrambled  
siRNATDP-43

55 kDa -

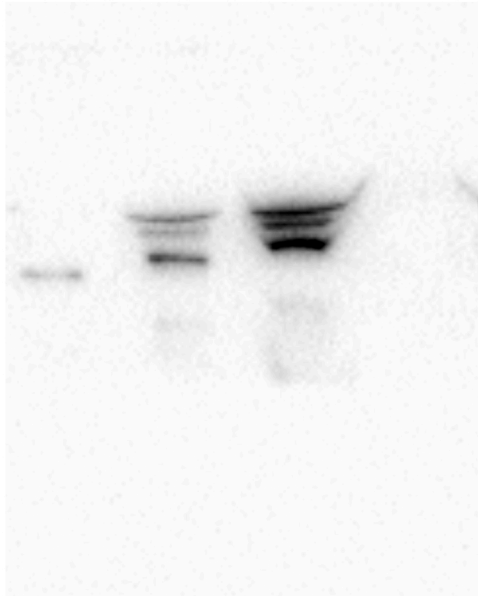

◀ Specific Pr55<sup>Gag</sup> band

**Figure S7C.** Replicate 3 p24 complete gel Western-blot associated with Figure 7C  
Cabrera-Rodríguez, R., *et al.*

Lysis of virions produced under  
different experimental conditions

---

Scrambled  
siRNATDP-43

24 kDa -

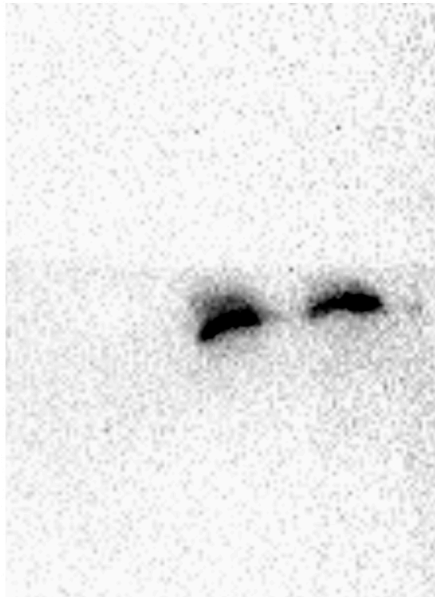

◀ Specific p24 band

**Figure S7C.** Replicate 3 Vif complete gel Western-blot associated with Figure 7C  
Cabrera-Rodríguez, R., *et al.*

Lysis of virions produced under  
different experimental conditions

---

Scrambled  
siRNATDP-43

21 kDa -

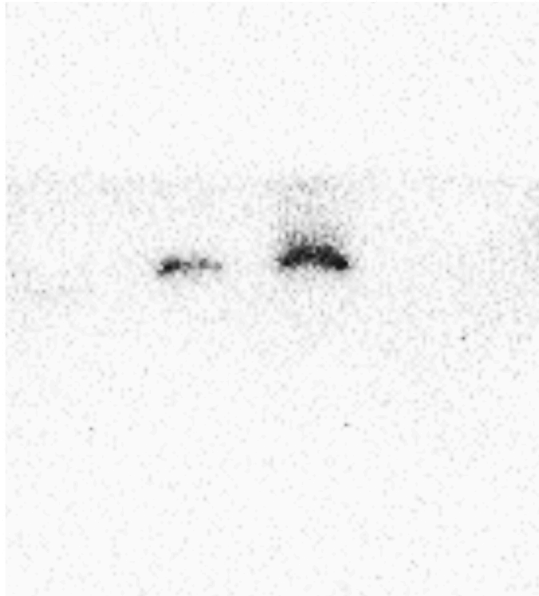

◀ Specific Vif band
